# Supplementary material for: Altered expression profiles of microRNA families during de-etiolation of maize and rice leaves
Source: BMC Res Notes. 2017 Feb 24;10:108. doi: 10.1186/s13104-016-2367-x (PMC5324284; doi:10.1186/s13104-016-2367-x)
Supplement: Supplementary file 9 — Additional file 9. Predicted target genes of both known and novel miRNAs for maize and rice. Potential targets for identified known and candidate novel miRNAs for both maize and rice were predicted by psRNATarget respectively. Aligned sequences and their genomic coordinates were also provided. [file 13104_2016_2367_MOESM9_ESM.xlsx]

## Sheet: maize_known
miRNA_Acc.	Target_Acc.	Expectation	UPE	miRNA_start	miRNA_end	Target_start	Target_end	miRNA_aligned_fragment	Target_aligned_fragment	Inhibition	Target_Desc.	multiplicity
zma-miR156d-5p	gnl|ZmGDB|GRMZM2G551565_T01	0	18.556	1	20	25	44	UGACAGAAGAGAGUGAGCAC	GUGCUCACUCUCUUCUGUCA	Cleavage	seq=cds; coord=5:92369026..92369713:1; parent_gene=GRMZM2G551565	1
zma-miR156d-5p	gnl|ZmGDB|AC233751.1_FGT002	1	23.513	1	20	1415	1434	UGACAGAAGAGAGUGAGCAC	GUGCUCUCUCUCUUCUGUCA	Cleavage	seq=cds; coord=4:44780143..44784469:-1; parent_gene=AC233751.1_FG002	1
zma-miR156d-5p	gnl|ZmGDB|GRMZM2G097275_T01	1	21.867	1	20	1106	1125	UGACAGAAGAGAGUGAGCAC	GUGCUCUCUCUCUUCUGUCA	Cleavage	seq=cds; coord=5:77940666..77945714:1; parent_gene=GRMZM2G097275	1
zma-miR156d-5p	gnl|ZmGDB|GRMZM2G097275_T03	1	21.867	1	20	1106	1125	UGACAGAAGAGAGUGAGCAC	GUGCUCUCUCUCUUCUGUCA	Cleavage	seq=cds; coord=5:77940666..77945676:1; parent_gene=GRMZM2G097275	1
zma-miR156d-5p	gnl|ZmGDB|GRMZM2G097275_T02	1	21.867	1	20	1106	1125	UGACAGAAGAGAGUGAGCAC	GUGCUCUCUCUCUUCUGUCA	Cleavage	seq=cds; coord=5:77940666..77945676:1; parent_gene=GRMZM2G097275	1
zma-miR156d-5p	gnl|ZmGDB|GRMZM5G878561_T01	1	19.127	1	20	950	969	UGACAGAAGAGAGUGAGCAC	GUGCUCUCUCUCUUCUGUCA	Cleavage	seq=cds; coord=3:159377754..159382446:-1; parent_gene=GRMZM5G878561	1
zma-miR156d-5p	gnl|ZmGDB|GRMZM2G097275_T04	1	21.867	1	20	998	1017	UGACAGAAGAGAGUGAGCAC	GUGCUCUCUCUCUUCUGUCA	Cleavage	seq=cds; coord=5:77940666..77945477:1; parent_gene=GRMZM2G097275	1
zma-miR156d-5p	gnl|ZmGDB|GRMZM2G061734_T01	1	17.452	1	20	941	960	UGACAGAAGAGAGUGAGCAC	GUGCUCUCUCUCUUCUGUCA	Cleavage	seq=cds; coord=2:192157754..192162802:1; parent_gene=GRMZM2G061734	1
zma-miR156d-5p	gnl|ZmGDB|GRMZM2G460544_T01	1	20.772	1	20	848	867	UGACAGAAGAGAGUGAGCAC	GUGCUCUCUCUCUUCUGUCA	Cleavage	seq=cds; coord=4:199278823..199283117:-1; parent_gene=GRMZM2G460544	1
zma-miR156d-5p	gnl|ZmGDB|GRMZM2G126018_T02	1	18.45	1	20	779	798	UGACAGAAGAGAGUGAGCAC	GUGCUCUCUCUCUUCUGUCA	Cleavage	seq=cds; coord=2:189838915..189842817:-1; parent_gene=GRMZM2G126018	1
zma-miR156d-5p	gnl|ZmGDB|GRMZM2G126018_T01	1	18.45	1	20	779	798	UGACAGAAGAGAGUGAGCAC	GUGCUCUCUCUCUUCUGUCA	Cleavage	seq=cds; coord=2:189838793..189842695:-1; parent_gene=GRMZM2G126018	1
zma-miR156d-5p	gnl|ZmGDB|GRMZM2G307588_T01	1	16.689	1	20	764	783	UGACAGAAGAGAGUGAGCAC	GUGCUCUCUCUCUUCUGUCA	Cleavage	seq=cds; coord=7:133170018..133173665:-1; parent_gene=GRMZM2G307588	1
zma-miR156d-5p	gnl|ZmGDB|GRMZM2G106798_T02	1	22.998	1	20	755	774	UGACAGAAGAGAGUGAGCAC	GUGCUCUCUCUCUUCUGUCA	Cleavage	seq=cds; coord=4:17489205..17501119:1; parent_gene=GRMZM2G106798	1
zma-miR156d-5p	gnl|ZmGDB|GRMZM2G106798_T03	1	22.998	1	20	755	774	UGACAGAAGAGAGUGAGCAC	GUGCUCUCUCUCUUCUGUCA	Cleavage	seq=cds; coord=4:17489205..17501119:1; parent_gene=GRMZM2G106798	1
zma-miR156d-3p	gnl|ZmGDB|GRMZM2G084046_T02	3	9.791	1	22	22	43	GCUCACUUCUCUUUCUGUCAGC	GCUGAGAGAAUGAGAAGUGAGG	Cleavage	seq=cds; coord=2:9085072..9086019:-1; parent_gene=GRMZM2G084046	1
zma-miR156d-3p	gnl|ZmGDB|GRMZM2G052148_T01	3	21.698	1	21	609	629	GCUCACUUCUCUUUCUGUCAG	CUGGCAGAAAGAGAAGAGAGA	Cleavage	seq=cds; coord=1:59581460..59591624:-1; parent_gene=GRMZM2G052148	1
zma-miR156d-3p	gnl|ZmGDB|GRMZM2G084046_T01	3	15.146	1	22	1408	1429	GCUCACUUCUCUUUCUGUCAGC	GCUGAGAGAAUGAGAAGUGAGG	Cleavage	seq=cds; coord=2:9085071..9088416:-1; parent_gene=GRMZM2G084046	1
zma-miR156d-3p	gnl|ZmGDB|GRMZM2G084046_T03	3	15.146	1	22	1414	1435	GCUCACUUCUCUUUCUGUCAGC	GCUGAGAGAAUGAGAAGUGAGG	Cleavage	seq=cds; coord=2:9085091..9088744:-1; parent_gene=GRMZM2G084046	1
zma-miR156f-5p	gnl|ZmGDB|GRMZM2G551565_T01	0	18.556	1	20	25	44	UGACAGAAGAGAGUGAGCAC	GUGCUCACUCUCUUCUGUCA	Cleavage	seq=cds; coord=5:92369026..92369713:1; parent_gene=GRMZM2G551565	1
zma-miR156f-5p	gnl|ZmGDB|AC233751.1_FGT002	1	23.513	1	20	1415	1434	UGACAGAAGAGAGUGAGCAC	GUGCUCUCUCUCUUCUGUCA	Cleavage	seq=cds; coord=4:44780143..44784469:-1; parent_gene=AC233751.1_FG002	1
zma-miR156f-5p	gnl|ZmGDB|GRMZM2G097275_T01	1	21.867	1	20	1106	1125	UGACAGAAGAGAGUGAGCAC	GUGCUCUCUCUCUUCUGUCA	Cleavage	seq=cds; coord=5:77940666..77945714:1; parent_gene=GRMZM2G097275	1
zma-miR156f-5p	gnl|ZmGDB|GRMZM2G097275_T03	1	21.867	1	20	1106	1125	UGACAGAAGAGAGUGAGCAC	GUGCUCUCUCUCUUCUGUCA	Cleavage	seq=cds; coord=5:77940666..77945676:1; parent_gene=GRMZM2G097275	1
zma-miR156f-5p	gnl|ZmGDB|GRMZM2G097275_T02	1	21.867	1	20	1106	1125	UGACAGAAGAGAGUGAGCAC	GUGCUCUCUCUCUUCUGUCA	Cleavage	seq=cds; coord=5:77940666..77945676:1; parent_gene=GRMZM2G097275	1
zma-miR156f-5p	gnl|ZmGDB|GRMZM5G878561_T01	1	19.127	1	20	950	969	UGACAGAAGAGAGUGAGCAC	GUGCUCUCUCUCUUCUGUCA	Cleavage	seq=cds; coord=3:159377754..159382446:-1; parent_gene=GRMZM5G878561	1
zma-miR156f-5p	gnl|ZmGDB|GRMZM2G097275_T04	1	21.867	1	20	998	1017	UGACAGAAGAGAGUGAGCAC	GUGCUCUCUCUCUUCUGUCA	Cleavage	seq=cds; coord=5:77940666..77945477:1; parent_gene=GRMZM2G097275	1
zma-miR156f-5p	gnl|ZmGDB|GRMZM2G061734_T01	1	17.452	1	20	941	960	UGACAGAAGAGAGUGAGCAC	GUGCUCUCUCUCUUCUGUCA	Cleavage	seq=cds; coord=2:192157754..192162802:1; parent_gene=GRMZM2G061734	1
zma-miR156f-5p	gnl|ZmGDB|GRMZM2G460544_T01	1	20.772	1	20	848	867	UGACAGAAGAGAGUGAGCAC	GUGCUCUCUCUCUUCUGUCA	Cleavage	seq=cds; coord=4:199278823..199283117:-1; parent_gene=GRMZM2G460544	1
zma-miR156f-5p	gnl|ZmGDB|GRMZM2G126018_T02	1	18.45	1	20	779	798	UGACAGAAGAGAGUGAGCAC	GUGCUCUCUCUCUUCUGUCA	Cleavage	seq=cds; coord=2:189838915..189842817:-1; parent_gene=GRMZM2G126018	1
zma-miR156f-5p	gnl|ZmGDB|GRMZM2G126018_T01	1	18.45	1	20	779	798	UGACAGAAGAGAGUGAGCAC	GUGCUCUCUCUCUUCUGUCA	Cleavage	seq=cds; coord=2:189838793..189842695:-1; parent_gene=GRMZM2G126018	1
zma-miR156f-5p	gnl|ZmGDB|GRMZM2G307588_T01	1	16.689	1	20	764	783	UGACAGAAGAGAGUGAGCAC	GUGCUCUCUCUCUUCUGUCA	Cleavage	seq=cds; coord=7:133170018..133173665:-1; parent_gene=GRMZM2G307588	1
zma-miR156f-5p	gnl|ZmGDB|GRMZM2G106798_T02	1	22.998	1	20	755	774	UGACAGAAGAGAGUGAGCAC	GUGCUCUCUCUCUUCUGUCA	Cleavage	seq=cds; coord=4:17489205..17501119:1; parent_gene=GRMZM2G106798	1
zma-miR156f-5p	gnl|ZmGDB|GRMZM2G106798_T03	1	22.998	1	20	755	774	UGACAGAAGAGAGUGAGCAC	GUGCUCUCUCUCUUCUGUCA	Cleavage	seq=cds; coord=4:17489205..17501119:1; parent_gene=GRMZM2G106798	1
zma-miR156f-3p	gnl|ZmGDB|GRMZM2G084046_T02	3	9.791	1	22	22	43	GCUCACUUCUCUUUCUGUCAGC	GCUGAGAGAAUGAGAAGUGAGG	Cleavage	seq=cds; coord=2:9085072..9086019:-1; parent_gene=GRMZM2G084046	1
zma-miR156f-3p	gnl|ZmGDB|GRMZM2G052148_T01	3	21.698	1	21	609	629	GCUCACUUCUCUUUCUGUCAG	CUGGCAGAAAGAGAAGAGAGA	Cleavage	seq=cds; coord=1:59581460..59591624:-1; parent_gene=GRMZM2G052148	1
zma-miR156f-3p	gnl|ZmGDB|GRMZM2G084046_T01	3	15.146	1	22	1408	1429	GCUCACUUCUCUUUCUGUCAGC	GCUGAGAGAAUGAGAAGUGAGG	Cleavage	seq=cds; coord=2:9085071..9088416:-1; parent_gene=GRMZM2G084046	1
zma-miR156f-3p	gnl|ZmGDB|GRMZM2G084046_T03	3	15.146	1	22	1414	1435	GCUCACUUCUCUUUCUGUCAGC	GCUGAGAGAAUGAGAAGUGAGG	Cleavage	seq=cds; coord=2:9085091..9088744:-1; parent_gene=GRMZM2G084046	1
zma-miR156g-5p	gnl|ZmGDB|GRMZM2G551565_T01	0	18.556	1	20	25	44	UGACAGAAGAGAGUGAGCAC	GUGCUCACUCUCUUCUGUCA	Cleavage	seq=cds; coord=5:92369026..92369713:1; parent_gene=GRMZM2G551565	1
zma-miR156g-5p	gnl|ZmGDB|AC233751.1_FGT002	1	23.513	1	20	1415	1434	UGACAGAAGAGAGUGAGCAC	GUGCUCUCUCUCUUCUGUCA	Cleavage	seq=cds; coord=4:44780143..44784469:-1; parent_gene=AC233751.1_FG002	1
zma-miR156g-5p	gnl|ZmGDB|GRMZM2G097275_T01	1	21.867	1	20	1106	1125	UGACAGAAGAGAGUGAGCAC	GUGCUCUCUCUCUUCUGUCA	Cleavage	seq=cds; coord=5:77940666..77945714:1; parent_gene=GRMZM2G097275	1
zma-miR156g-5p	gnl|ZmGDB|GRMZM2G097275_T03	1	21.867	1	20	1106	1125	UGACAGAAGAGAGUGAGCAC	GUGCUCUCUCUCUUCUGUCA	Cleavage	seq=cds; coord=5:77940666..77945676:1; parent_gene=GRMZM2G097275	1
zma-miR156g-5p	gnl|ZmGDB|GRMZM2G097275_T02	1	21.867	1	20	1106	1125	UGACAGAAGAGAGUGAGCAC	GUGCUCUCUCUCUUCUGUCA	Cleavage	seq=cds; coord=5:77940666..77945676:1; parent_gene=GRMZM2G097275	1
zma-miR156g-5p	gnl|ZmGDB|GRMZM5G878561_T01	1	19.127	1	20	950	969	UGACAGAAGAGAGUGAGCAC	GUGCUCUCUCUCUUCUGUCA	Cleavage	seq=cds; coord=3:159377754..159382446:-1; parent_gene=GRMZM5G878561	1
zma-miR156g-5p	gnl|ZmGDB|GRMZM2G097275_T04	1	21.867	1	20	998	1017	UGACAGAAGAGAGUGAGCAC	GUGCUCUCUCUCUUCUGUCA	Cleavage	seq=cds; coord=5:77940666..77945477:1; parent_gene=GRMZM2G097275	1
zma-miR156g-5p	gnl|ZmGDB|GRMZM2G061734_T01	1	17.452	1	20	941	960	UGACAGAAGAGAGUGAGCAC	GUGCUCUCUCUCUUCUGUCA	Cleavage	seq=cds; coord=2:192157754..192162802:1; parent_gene=GRMZM2G061734	1
zma-miR156g-5p	gnl|ZmGDB|GRMZM2G460544_T01	1	20.772	1	20	848	867	UGACAGAAGAGAGUGAGCAC	GUGCUCUCUCUCUUCUGUCA	Cleavage	seq=cds; coord=4:199278823..199283117:-1; parent_gene=GRMZM2G460544	1
zma-miR156g-5p	gnl|ZmGDB|GRMZM2G126018_T02	1	18.45	1	20	779	798	UGACAGAAGAGAGUGAGCAC	GUGCUCUCUCUCUUCUGUCA	Cleavage	seq=cds; coord=2:189838915..189842817:-1; parent_gene=GRMZM2G126018	1
zma-miR156g-5p	gnl|ZmGDB|GRMZM2G126018_T01	1	18.45	1	20	779	798	UGACAGAAGAGAGUGAGCAC	GUGCUCUCUCUCUUCUGUCA	Cleavage	seq=cds; coord=2:189838793..189842695:-1; parent_gene=GRMZM2G126018	1
zma-miR156g-5p	gnl|ZmGDB|GRMZM2G307588_T01	1	16.689	1	20	764	783	UGACAGAAGAGAGUGAGCAC	GUGCUCUCUCUCUUCUGUCA	Cleavage	seq=cds; coord=7:133170018..133173665:-1; parent_gene=GRMZM2G307588	1
zma-miR156g-5p	gnl|ZmGDB|GRMZM2G106798_T02	1	22.998	1	20	755	774	UGACAGAAGAGAGUGAGCAC	GUGCUCUCUCUCUUCUGUCA	Cleavage	seq=cds; coord=4:17489205..17501119:1; parent_gene=GRMZM2G106798	1
zma-miR156g-5p	gnl|ZmGDB|GRMZM2G106798_T03	1	22.998	1	20	755	774	UGACAGAAGAGAGUGAGCAC	GUGCUCUCUCUCUUCUGUCA	Cleavage	seq=cds; coord=4:17489205..17501119:1; parent_gene=GRMZM2G106798	1
zma-miR156g-3p	gnl|ZmGDB|GRMZM2G084046_T02	3	9.791	1	22	22	43	GCUCACUUCUCUUUCUGUCAGC	GCUGAGAGAAUGAGAAGUGAGG	Cleavage	seq=cds; coord=2:9085072..9086019:-1; parent_gene=GRMZM2G084046	1
zma-miR156g-3p	gnl|ZmGDB|GRMZM2G052148_T01	3	21.698	1	21	609	629	GCUCACUUCUCUUUCUGUCAG	CUGGCAGAAAGAGAAGAGAGA	Cleavage	seq=cds; coord=1:59581460..59591624:-1; parent_gene=GRMZM2G052148	1
zma-miR156g-3p	gnl|ZmGDB|GRMZM2G084046_T01	3	15.146	1	22	1408	1429	GCUCACUUCUCUUUCUGUCAGC	GCUGAGAGAAUGAGAAGUGAGG	Cleavage	seq=cds; coord=2:9085071..9088416:-1; parent_gene=GRMZM2G084046	1
zma-miR156g-3p	gnl|ZmGDB|GRMZM2G084046_T03	3	15.146	1	22	1414	1435	GCUCACUUCUCUUUCUGUCAGC	GCUGAGAGAAUGAGAAGUGAGG	Cleavage	seq=cds; coord=2:9085091..9088744:-1; parent_gene=GRMZM2G084046	1
zma-miR156b-5p	gnl|ZmGDB|GRMZM2G551565_T01	0	18.556	1	20	25	44	UGACAGAAGAGAGUGAGCAC	GUGCUCACUCUCUUCUGUCA	Cleavage	seq=cds; coord=5:92369026..92369713:1; parent_gene=GRMZM2G551565	1
zma-miR156b-5p	gnl|ZmGDB|AC233751.1_FGT002	1	23.513	1	20	1415	1434	UGACAGAAGAGAGUGAGCAC	GUGCUCUCUCUCUUCUGUCA	Cleavage	seq=cds; coord=4:44780143..44784469:-1; parent_gene=AC233751.1_FG002	1
zma-miR156b-5p	gnl|ZmGDB|GRMZM2G097275_T01	1	21.867	1	20	1106	1125	UGACAGAAGAGAGUGAGCAC	GUGCUCUCUCUCUUCUGUCA	Cleavage	seq=cds; coord=5:77940666..77945714:1; parent_gene=GRMZM2G097275	1
zma-miR156b-5p	gnl|ZmGDB|GRMZM2G097275_T03	1	21.867	1	20	1106	1125	UGACAGAAGAGAGUGAGCAC	GUGCUCUCUCUCUUCUGUCA	Cleavage	seq=cds; coord=5:77940666..77945676:1; parent_gene=GRMZM2G097275	1
zma-miR156b-5p	gnl|ZmGDB|GRMZM2G097275_T02	1	21.867	1	20	1106	1125	UGACAGAAGAGAGUGAGCAC	GUGCUCUCUCUCUUCUGUCA	Cleavage	seq=cds; coord=5:77940666..77945676:1; parent_gene=GRMZM2G097275	1
zma-miR156b-5p	gnl|ZmGDB|GRMZM5G878561_T01	1	19.127	1	20	950	969	UGACAGAAGAGAGUGAGCAC	GUGCUCUCUCUCUUCUGUCA	Cleavage	seq=cds; coord=3:159377754..159382446:-1; parent_gene=GRMZM5G878561	1
zma-miR156b-5p	gnl|ZmGDB|GRMZM2G097275_T04	1	21.867	1	20	998	1017	UGACAGAAGAGAGUGAGCAC	GUGCUCUCUCUCUUCUGUCA	Cleavage	seq=cds; coord=5:77940666..77945477:1; parent_gene=GRMZM2G097275	1
zma-miR156b-5p	gnl|ZmGDB|GRMZM2G061734_T01	1	17.452	1	20	941	960	UGACAGAAGAGAGUGAGCAC	GUGCUCUCUCUCUUCUGUCA	Cleavage	seq=cds; coord=2:192157754..192162802:1; parent_gene=GRMZM2G061734	1
zma-miR156b-5p	gnl|ZmGDB|GRMZM2G460544_T01	1	20.772	1	20	848	867	UGACAGAAGAGAGUGAGCAC	GUGCUCUCUCUCUUCUGUCA	Cleavage	seq=cds; coord=4:199278823..199283117:-1; parent_gene=GRMZM2G460544	1
zma-miR156b-5p	gnl|ZmGDB|GRMZM2G126018_T02	1	18.45	1	20	779	798	UGACAGAAGAGAGUGAGCAC	GUGCUCUCUCUCUUCUGUCA	Cleavage	seq=cds; coord=2:189838915..189842817:-1; parent_gene=GRMZM2G126018	1
zma-miR156b-5p	gnl|ZmGDB|GRMZM2G126018_T01	1	18.45	1	20	779	798	UGACAGAAGAGAGUGAGCAC	GUGCUCUCUCUCUUCUGUCA	Cleavage	seq=cds; coord=2:189838793..189842695:-1; parent_gene=GRMZM2G126018	1
zma-miR156b-5p	gnl|ZmGDB|GRMZM2G307588_T01	1	16.689	1	20	764	783	UGACAGAAGAGAGUGAGCAC	GUGCUCUCUCUCUUCUGUCA	Cleavage	seq=cds; coord=7:133170018..133173665:-1; parent_gene=GRMZM2G307588	1
zma-miR156b-5p	gnl|ZmGDB|GRMZM2G106798_T02	1	22.998	1	20	755	774	UGACAGAAGAGAGUGAGCAC	GUGCUCUCUCUCUUCUGUCA	Cleavage	seq=cds; coord=4:17489205..17501119:1; parent_gene=GRMZM2G106798	1
zma-miR156b-5p	gnl|ZmGDB|GRMZM2G106798_T03	1	22.998	1	20	755	774	UGACAGAAGAGAGUGAGCAC	GUGCUCUCUCUCUUCUGUCA	Cleavage	seq=cds; coord=4:17489205..17501119:1; parent_gene=GRMZM2G106798	1
zma-miR156c	gnl|ZmGDB|GRMZM2G551565_T01	0	18.556	1	20	25	44	UGACAGAAGAGAGUGAGCAC	GUGCUCACUCUCUUCUGUCA	Cleavage	seq=cds; coord=5:92369026..92369713:1; parent_gene=GRMZM2G551565	1
zma-miR156c	gnl|ZmGDB|AC233751.1_FGT002	1	23.513	1	20	1415	1434	UGACAGAAGAGAGUGAGCAC	GUGCUCUCUCUCUUCUGUCA	Cleavage	seq=cds; coord=4:44780143..44784469:-1; parent_gene=AC233751.1_FG002	1
zma-miR156c	gnl|ZmGDB|GRMZM2G097275_T01	1	21.867	1	20	1106	1125	UGACAGAAGAGAGUGAGCAC	GUGCUCUCUCUCUUCUGUCA	Cleavage	seq=cds; coord=5:77940666..77945714:1; parent_gene=GRMZM2G097275	1
zma-miR156c	gnl|ZmGDB|GRMZM2G097275_T03	1	21.867	1	20	1106	1125	UGACAGAAGAGAGUGAGCAC	GUGCUCUCUCUCUUCUGUCA	Cleavage	seq=cds; coord=5:77940666..77945676:1; parent_gene=GRMZM2G097275	1
zma-miR156c	gnl|ZmGDB|GRMZM2G097275_T02	1	21.867	1	20	1106	1125	UGACAGAAGAGAGUGAGCAC	GUGCUCUCUCUCUUCUGUCA	Cleavage	seq=cds; coord=5:77940666..77945676:1; parent_gene=GRMZM2G097275	1
zma-miR156c	gnl|ZmGDB|GRMZM5G878561_T01	1	19.127	1	20	950	969	UGACAGAAGAGAGUGAGCAC	GUGCUCUCUCUCUUCUGUCA	Cleavage	seq=cds; coord=3:159377754..159382446:-1; parent_gene=GRMZM5G878561	1
zma-miR156c	gnl|ZmGDB|GRMZM2G097275_T04	1	21.867	1	20	998	1017	UGACAGAAGAGAGUGAGCAC	GUGCUCUCUCUCUUCUGUCA	Cleavage	seq=cds; coord=5:77940666..77945477:1; parent_gene=GRMZM2G097275	1
zma-miR156c	gnl|ZmGDB|GRMZM2G061734_T01	1	17.452	1	20	941	960	UGACAGAAGAGAGUGAGCAC	GUGCUCUCUCUCUUCUGUCA	Cleavage	seq=cds; coord=2:192157754..192162802:1; parent_gene=GRMZM2G061734	1
zma-miR156c	gnl|ZmGDB|GRMZM2G460544_T01	1	20.772	1	20	848	867	UGACAGAAGAGAGUGAGCAC	GUGCUCUCUCUCUUCUGUCA	Cleavage	seq=cds; coord=4:199278823..199283117:-1; parent_gene=GRMZM2G460544	1
zma-miR156c	gnl|ZmGDB|GRMZM2G126018_T02	1	18.45	1	20	779	798	UGACAGAAGAGAGUGAGCAC	GUGCUCUCUCUCUUCUGUCA	Cleavage	seq=cds; coord=2:189838915..189842817:-1; parent_gene=GRMZM2G126018	1
zma-miR156c	gnl|ZmGDB|GRMZM2G126018_T01	1	18.45	1	20	779	798	UGACAGAAGAGAGUGAGCAC	GUGCUCUCUCUCUUCUGUCA	Cleavage	seq=cds; coord=2:189838793..189842695:-1; parent_gene=GRMZM2G126018	1
zma-miR156c	gnl|ZmGDB|GRMZM2G307588_T01	1	16.689	1	20	764	783	UGACAGAAGAGAGUGAGCAC	GUGCUCUCUCUCUUCUGUCA	Cleavage	seq=cds; coord=7:133170018..133173665:-1; parent_gene=GRMZM2G307588	1
zma-miR156c	gnl|ZmGDB|GRMZM2G106798_T02	1	22.998	1	20	755	774	UGACAGAAGAGAGUGAGCAC	GUGCUCUCUCUCUUCUGUCA	Cleavage	seq=cds; coord=4:17489205..17501119:1; parent_gene=GRMZM2G106798	1
zma-miR156c	gnl|ZmGDB|GRMZM2G106798_T03	1	22.998	1	20	755	774	UGACAGAAGAGAGUGAGCAC	GUGCUCUCUCUCUUCUGUCA	Cleavage	seq=cds; coord=4:17489205..17501119:1; parent_gene=GRMZM2G106798	1
zma-miR156e-5p	gnl|ZmGDB|GRMZM2G551565_T01	0	18.556	1	20	25	44	UGACAGAAGAGAGUGAGCAC	GUGCUCACUCUCUUCUGUCA	Cleavage	seq=cds; coord=5:92369026..92369713:1; parent_gene=GRMZM2G551565	1
zma-miR156e-5p	gnl|ZmGDB|AC233751.1_FGT002	1	23.513	1	20	1415	1434	UGACAGAAGAGAGUGAGCAC	GUGCUCUCUCUCUUCUGUCA	Cleavage	seq=cds; coord=4:44780143..44784469:-1; parent_gene=AC233751.1_FG002	1
zma-miR156e-5p	gnl|ZmGDB|GRMZM2G097275_T01	1	21.867	1	20	1106	1125	UGACAGAAGAGAGUGAGCAC	GUGCUCUCUCUCUUCUGUCA	Cleavage	seq=cds; coord=5:77940666..77945714:1; parent_gene=GRMZM2G097275	1
zma-miR156e-5p	gnl|ZmGDB|GRMZM2G097275_T03	1	21.867	1	20	1106	1125	UGACAGAAGAGAGUGAGCAC	GUGCUCUCUCUCUUCUGUCA	Cleavage	seq=cds; coord=5:77940666..77945676:1; parent_gene=GRMZM2G097275	1
zma-miR156e-5p	gnl|ZmGDB|GRMZM2G097275_T02	1	21.867	1	20	1106	1125	UGACAGAAGAGAGUGAGCAC	GUGCUCUCUCUCUUCUGUCA	Cleavage	seq=cds; coord=5:77940666..77945676:1; parent_gene=GRMZM2G097275	1
zma-miR156e-5p	gnl|ZmGDB|GRMZM5G878561_T01	1	19.127	1	20	950	969	UGACAGAAGAGAGUGAGCAC	GUGCUCUCUCUCUUCUGUCA	Cleavage	seq=cds; coord=3:159377754..159382446:-1; parent_gene=GRMZM5G878561	1
zma-miR156e-5p	gnl|ZmGDB|GRMZM2G097275_T04	1	21.867	1	20	998	1017	UGACAGAAGAGAGUGAGCAC	GUGCUCUCUCUCUUCUGUCA	Cleavage	seq=cds; coord=5:77940666..77945477:1; parent_gene=GRMZM2G097275	1
zma-miR156e-5p	gnl|ZmGDB|GRMZM2G061734_T01	1	17.452	1	20	941	960	UGACAGAAGAGAGUGAGCAC	GUGCUCUCUCUCUUCUGUCA	Cleavage	seq=cds; coord=2:192157754..192162802:1; parent_gene=GRMZM2G061734	1
zma-miR156e-5p	gnl|ZmGDB|GRMZM2G460544_T01	1	20.772	1	20	848	867	UGACAGAAGAGAGUGAGCAC	GUGCUCUCUCUCUUCUGUCA	Cleavage	seq=cds; coord=4:199278823..199283117:-1; parent_gene=GRMZM2G460544	1
zma-miR156e-5p	gnl|ZmGDB|GRMZM2G126018_T02	1	18.45	1	20	779	798	UGACAGAAGAGAGUGAGCAC	GUGCUCUCUCUCUUCUGUCA	Cleavage	seq=cds; coord=2:189838915..189842817:-1; parent_gene=GRMZM2G126018	1
zma-miR156e-5p	gnl|ZmGDB|GRMZM2G126018_T01	1	18.45	1	20	779	798	UGACAGAAGAGAGUGAGCAC	GUGCUCUCUCUCUUCUGUCA	Cleavage	seq=cds; coord=2:189838793..189842695:-1; parent_gene=GRMZM2G126018	1
zma-miR156e-5p	gnl|ZmGDB|GRMZM2G307588_T01	1	16.689	1	20	764	783	UGACAGAAGAGAGUGAGCAC	GUGCUCUCUCUCUUCUGUCA	Cleavage	seq=cds; coord=7:133170018..133173665:-1; parent_gene=GRMZM2G307588	1
zma-miR156e-5p	gnl|ZmGDB|GRMZM2G106798_T02	1	22.998	1	20	755	774	UGACAGAAGAGAGUGAGCAC	GUGCUCUCUCUCUUCUGUCA	Cleavage	seq=cds; coord=4:17489205..17501119:1; parent_gene=GRMZM2G106798	1
zma-miR156e-5p	gnl|ZmGDB|GRMZM2G106798_T03	1	22.998	1	20	755	774	UGACAGAAGAGAGUGAGCAC	GUGCUCUCUCUCUUCUGUCA	Cleavage	seq=cds; coord=4:17489205..17501119:1; parent_gene=GRMZM2G106798	1
zma-miR156e-3p	gnl|ZmGDB|GRMZM2G347583_T01	2.5	17.483	1	22	955	976	GCUCACUGCUCUCUCUGUCAUC	GGUGGCAGAGGAAGCAGUGGGC	Translation	seq=cds; coord=1:68660278..68665995:1; parent_gene=GRMZM2G347583	1
zma-miR156a-5p	gnl|ZmGDB|GRMZM2G551565_T01	0	18.556	1	20	25	44	UGACAGAAGAGAGUGAGCAC	GUGCUCACUCUCUUCUGUCA	Cleavage	seq=cds; coord=5:92369026..92369713:1; parent_gene=GRMZM2G551565	1
zma-miR156a-5p	gnl|ZmGDB|AC233751.1_FGT002	1	23.513	1	20	1415	1434	UGACAGAAGAGAGUGAGCAC	GUGCUCUCUCUCUUCUGUCA	Cleavage	seq=cds; coord=4:44780143..44784469:-1; parent_gene=AC233751.1_FG002	1
zma-miR156a-5p	gnl|ZmGDB|GRMZM2G097275_T01	1	21.867	1	20	1106	1125	UGACAGAAGAGAGUGAGCAC	GUGCUCUCUCUCUUCUGUCA	Cleavage	seq=cds; coord=5:77940666..77945714:1; parent_gene=GRMZM2G097275	1
zma-miR156a-5p	gnl|ZmGDB|GRMZM2G097275_T03	1	21.867	1	20	1106	1125	UGACAGAAGAGAGUGAGCAC	GUGCUCUCUCUCUUCUGUCA	Cleavage	seq=cds; coord=5:77940666..77945676:1; parent_gene=GRMZM2G097275	1
zma-miR156a-5p	gnl|ZmGDB|GRMZM2G097275_T02	1	21.867	1	20	1106	1125	UGACAGAAGAGAGUGAGCAC	GUGCUCUCUCUCUUCUGUCA	Cleavage	seq=cds; coord=5:77940666..77945676:1; parent_gene=GRMZM2G097275	1
zma-miR156a-5p	gnl|ZmGDB|GRMZM5G878561_T01	1	19.127	1	20	950	969	UGACAGAAGAGAGUGAGCAC	GUGCUCUCUCUCUUCUGUCA	Cleavage	seq=cds; coord=3:159377754..159382446:-1; parent_gene=GRMZM5G878561	1
zma-miR156a-5p	gnl|ZmGDB|GRMZM2G097275_T04	1	21.867	1	20	998	1017	UGACAGAAGAGAGUGAGCAC	GUGCUCUCUCUCUUCUGUCA	Cleavage	seq=cds; coord=5:77940666..77945477:1; parent_gene=GRMZM2G097275	1
zma-miR156a-5p	gnl|ZmGDB|GRMZM2G061734_T01	1	17.452	1	20	941	960	UGACAGAAGAGAGUGAGCAC	GUGCUCUCUCUCUUCUGUCA	Cleavage	seq=cds; coord=2:192157754..192162802:1; parent_gene=GRMZM2G061734	1
zma-miR156a-5p	gnl|ZmGDB|GRMZM2G460544_T01	1	20.772	1	20	848	867	UGACAGAAGAGAGUGAGCAC	GUGCUCUCUCUCUUCUGUCA	Cleavage	seq=cds; coord=4:199278823..199283117:-1; parent_gene=GRMZM2G460544	1
zma-miR156a-5p	gnl|ZmGDB|GRMZM2G126018_T02	1	18.45	1	20	779	798	UGACAGAAGAGAGUGAGCAC	GUGCUCUCUCUCUUCUGUCA	Cleavage	seq=cds; coord=2:189838915..189842817:-1; parent_gene=GRMZM2G126018	1
zma-miR156a-5p	gnl|ZmGDB|GRMZM2G126018_T01	1	18.45	1	20	779	798	UGACAGAAGAGAGUGAGCAC	GUGCUCUCUCUCUUCUGUCA	Cleavage	seq=cds; coord=2:189838793..189842695:-1; parent_gene=GRMZM2G126018	1
zma-miR156a-5p	gnl|ZmGDB|GRMZM2G307588_T01	1	16.689	1	20	764	783	UGACAGAAGAGAGUGAGCAC	GUGCUCUCUCUCUUCUGUCA	Cleavage	seq=cds; coord=7:133170018..133173665:-1; parent_gene=GRMZM2G307588	1
zma-miR156a-5p	gnl|ZmGDB|GRMZM2G106798_T02	1	22.998	1	20	755	774	UGACAGAAGAGAGUGAGCAC	GUGCUCUCUCUCUUCUGUCA	Cleavage	seq=cds; coord=4:17489205..17501119:1; parent_gene=GRMZM2G106798	1
zma-miR156a-5p	gnl|ZmGDB|GRMZM2G106798_T03	1	22.998	1	20	755	774	UGACAGAAGAGAGUGAGCAC	GUGCUCUCUCUCUUCUGUCA	Cleavage	seq=cds; coord=4:17489205..17501119:1; parent_gene=GRMZM2G106798	1
zma-miR156a-3p	gnl|ZmGDB|AC233960.1_FGT005	3	20.727	1	22	832	853	GCUCACUUCUCUCUCUGUCAGU	ACUGAAAGAGAGAGGAGGGAGC	Cleavage	seq=cds; coord=5:199967466..199969471:-1; parent_gene=AC233960.1_FG005	1
zma-miR156h-5p	gnl|ZmGDB|GRMZM2G551565_T01	0	18.556	1	20	25	44	UGACAGAAGAGAGUGAGCAC	GUGCUCACUCUCUUCUGUCA	Cleavage	seq=cds; coord=5:92369026..92369713:1; parent_gene=GRMZM2G551565	1
zma-miR156h-5p	gnl|ZmGDB|AC233751.1_FGT002	1	23.513	1	20	1415	1434	UGACAGAAGAGAGUGAGCAC	GUGCUCUCUCUCUUCUGUCA	Cleavage	seq=cds; coord=4:44780143..44784469:-1; parent_gene=AC233751.1_FG002	1
zma-miR156h-5p	gnl|ZmGDB|GRMZM2G097275_T01	1	21.867	1	20	1106	1125	UGACAGAAGAGAGUGAGCAC	GUGCUCUCUCUCUUCUGUCA	Cleavage	seq=cds; coord=5:77940666..77945714:1; parent_gene=GRMZM2G097275	1
zma-miR156h-5p	gnl|ZmGDB|GRMZM2G097275_T03	1	21.867	1	20	1106	1125	UGACAGAAGAGAGUGAGCAC	GUGCUCUCUCUCUUCUGUCA	Cleavage	seq=cds; coord=5:77940666..77945676:1; parent_gene=GRMZM2G097275	1
zma-miR156h-5p	gnl|ZmGDB|GRMZM2G097275_T02	1	21.867	1	20	1106	1125	UGACAGAAGAGAGUGAGCAC	GUGCUCUCUCUCUUCUGUCA	Cleavage	seq=cds; coord=5:77940666..77945676:1; parent_gene=GRMZM2G097275	1
zma-miR156h-5p	gnl|ZmGDB|GRMZM5G878561_T01	1	19.127	1	20	950	969	UGACAGAAGAGAGUGAGCAC	GUGCUCUCUCUCUUCUGUCA	Cleavage	seq=cds; coord=3:159377754..159382446:-1; parent_gene=GRMZM5G878561	1
zma-miR156h-5p	gnl|ZmGDB|GRMZM2G097275_T04	1	21.867	1	20	998	1017	UGACAGAAGAGAGUGAGCAC	GUGCUCUCUCUCUUCUGUCA	Cleavage	seq=cds; coord=5:77940666..77945477:1; parent_gene=GRMZM2G097275	1
zma-miR156h-5p	gnl|ZmGDB|GRMZM2G061734_T01	1	17.452	1	20	941	960	UGACAGAAGAGAGUGAGCAC	GUGCUCUCUCUCUUCUGUCA	Cleavage	seq=cds; coord=2:192157754..192162802:1; parent_gene=GRMZM2G061734	1
zma-miR156h-5p	gnl|ZmGDB|GRMZM2G460544_T01	1	20.772	1	20	848	867	UGACAGAAGAGAGUGAGCAC	GUGCUCUCUCUCUUCUGUCA	Cleavage	seq=cds; coord=4:199278823..199283117:-1; parent_gene=GRMZM2G460544	1
zma-miR156h-5p	gnl|ZmGDB|GRMZM2G126018_T02	1	18.45	1	20	779	798	UGACAGAAGAGAGUGAGCAC	GUGCUCUCUCUCUUCUGUCA	Cleavage	seq=cds; coord=2:189838915..189842817:-1; parent_gene=GRMZM2G126018	1
zma-miR156h-5p	gnl|ZmGDB|GRMZM2G126018_T01	1	18.45	1	20	779	798	UGACAGAAGAGAGUGAGCAC	GUGCUCUCUCUCUUCUGUCA	Cleavage	seq=cds; coord=2:189838793..189842695:-1; parent_gene=GRMZM2G126018	1
zma-miR156h-5p	gnl|ZmGDB|GRMZM2G307588_T01	1	16.689	1	20	764	783	UGACAGAAGAGAGUGAGCAC	GUGCUCUCUCUCUUCUGUCA	Cleavage	seq=cds; coord=7:133170018..133173665:-1; parent_gene=GRMZM2G307588	1
zma-miR156h-5p	gnl|ZmGDB|GRMZM2G106798_T02	1	22.998	1	20	755	774	UGACAGAAGAGAGUGAGCAC	GUGCUCUCUCUCUUCUGUCA	Cleavage	seq=cds; coord=4:17489205..17501119:1; parent_gene=GRMZM2G106798	1
zma-miR156h-5p	gnl|ZmGDB|GRMZM2G106798_T03	1	22.998	1	20	755	774	UGACAGAAGAGAGUGAGCAC	GUGCUCUCUCUCUUCUGUCA	Cleavage	seq=cds; coord=4:17489205..17501119:1; parent_gene=GRMZM2G106798	1
zma-miR156h-3p	gnl|ZmGDB|GRMZM5G892373_T01	3	15.617	1	22	169	190	GCUCACUGCUCUUUCUGUCAUC	GAUGACAGAAGUAGCAGUGAUC	Translation	seq=cds; coord=9:150199973..150201533:-1; parent_gene=GRMZM5G892373	1
zma-miR156h-3p	gnl|ZmGDB|GRMZM2G347583_T01	3	17.483	1	22	955	976	GCUCACUGCUCUUUCUGUCAUC	GGUGGCAGAGGAAGCAGUGGGC	Translation	seq=cds; coord=1:68660278..68665995:1; parent_gene=GRMZM2G347583	1
zma-miR156i-5p	gnl|ZmGDB|GRMZM2G551565_T01	0	18.556	1	20	25	44	UGACAGAAGAGAGUGAGCAC	GUGCUCACUCUCUUCUGUCA	Cleavage	seq=cds; coord=5:92369026..92369713:1; parent_gene=GRMZM2G551565	1
zma-miR156i-5p	gnl|ZmGDB|AC233751.1_FGT002	1	23.513	1	20	1415	1434	UGACAGAAGAGAGUGAGCAC	GUGCUCUCUCUCUUCUGUCA	Cleavage	seq=cds; coord=4:44780143..44784469:-1; parent_gene=AC233751.1_FG002	1
zma-miR156i-5p	gnl|ZmGDB|GRMZM2G097275_T01	1	21.867	1	20	1106	1125	UGACAGAAGAGAGUGAGCAC	GUGCUCUCUCUCUUCUGUCA	Cleavage	seq=cds; coord=5:77940666..77945714:1; parent_gene=GRMZM2G097275	1
zma-miR156i-5p	gnl|ZmGDB|GRMZM2G097275_T03	1	21.867	1	20	1106	1125	UGACAGAAGAGAGUGAGCAC	GUGCUCUCUCUCUUCUGUCA	Cleavage	seq=cds; coord=5:77940666..77945676:1; parent_gene=GRMZM2G097275	1
zma-miR156i-5p	gnl|ZmGDB|GRMZM2G097275_T02	1	21.867	1	20	1106	1125	UGACAGAAGAGAGUGAGCAC	GUGCUCUCUCUCUUCUGUCA	Cleavage	seq=cds; coord=5:77940666..77945676:1; parent_gene=GRMZM2G097275	1
zma-miR156i-5p	gnl|ZmGDB|GRMZM5G878561_T01	1	19.127	1	20	950	969	UGACAGAAGAGAGUGAGCAC	GUGCUCUCUCUCUUCUGUCA	Cleavage	seq=cds; coord=3:159377754..159382446:-1; parent_gene=GRMZM5G878561	1
zma-miR156i-5p	gnl|ZmGDB|GRMZM2G097275_T04	1	21.867	1	20	998	1017	UGACAGAAGAGAGUGAGCAC	GUGCUCUCUCUCUUCUGUCA	Cleavage	seq=cds; coord=5:77940666..77945477:1; parent_gene=GRMZM2G097275	1
zma-miR156i-5p	gnl|ZmGDB|GRMZM2G061734_T01	1	17.452	1	20	941	960	UGACAGAAGAGAGUGAGCAC	GUGCUCUCUCUCUUCUGUCA	Cleavage	seq=cds; coord=2:192157754..192162802:1; parent_gene=GRMZM2G061734	1
zma-miR156i-5p	gnl|ZmGDB|GRMZM2G460544_T01	1	20.772	1	20	848	867	UGACAGAAGAGAGUGAGCAC	GUGCUCUCUCUCUUCUGUCA	Cleavage	seq=cds; coord=4:199278823..199283117:-1; parent_gene=GRMZM2G460544	1
zma-miR156i-5p	gnl|ZmGDB|GRMZM2G126018_T02	1	18.45	1	20	779	798	UGACAGAAGAGAGUGAGCAC	GUGCUCUCUCUCUUCUGUCA	Cleavage	seq=cds; coord=2:189838915..189842817:-1; parent_gene=GRMZM2G126018	1
zma-miR156i-5p	gnl|ZmGDB|GRMZM2G126018_T01	1	18.45	1	20	779	798	UGACAGAAGAGAGUGAGCAC	GUGCUCUCUCUCUUCUGUCA	Cleavage	seq=cds; coord=2:189838793..189842695:-1; parent_gene=GRMZM2G126018	1
zma-miR156i-5p	gnl|ZmGDB|GRMZM2G307588_T01	1	16.689	1	20	764	783	UGACAGAAGAGAGUGAGCAC	GUGCUCUCUCUCUUCUGUCA	Cleavage	seq=cds; coord=7:133170018..133173665:-1; parent_gene=GRMZM2G307588	1
zma-miR156i-5p	gnl|ZmGDB|GRMZM2G106798_T02	1	22.998	1	20	755	774	UGACAGAAGAGAGUGAGCAC	GUGCUCUCUCUCUUCUGUCA	Cleavage	seq=cds; coord=4:17489205..17501119:1; parent_gene=GRMZM2G106798	1
zma-miR156i-5p	gnl|ZmGDB|GRMZM2G106798_T03	1	22.998	1	20	755	774	UGACAGAAGAGAGUGAGCAC	GUGCUCUCUCUCUUCUGUCA	Cleavage	seq=cds; coord=4:17489205..17501119:1; parent_gene=GRMZM2G106798	1
zma-miR160a-5p	gnl|ZmGDB|GRMZM2G567718_T01	0	12.852	1	21	6	26	UGCCUGGCUCCCUGUAUGCCA	UGGCAUACAGGGAGCCAGGCA	Cleavage	seq=cds; coord=6:9144425..9144859:-1; parent_gene=GRMZM2G567718	1
zma-miR160a-5p	gnl|ZmGDB|GRMZM2G159399_T01	0	21.942	1	20	1315	1334	UGCCUGGCUCCCUGUAUGCC	GGCAUACAGGGAGCCAGGCA	Cleavage	seq=cds; coord=5:27944757..27949513:-1; parent_gene=GRMZM2G159399	1
zma-miR160a-5p	gnl|ZmGDB|AC207656.3_FGT002	0	24.063	1	20	1351	1370	UGCCUGGCUCCCUGUAUGCC	GGCAUACAGGGAGCCAGGCA	Cleavage	seq=cds; coord=5:49253260..49255662:1; parent_gene=AC207656.3_FG002	1
zma-miR160a-5p	gnl|ZmGDB|AC207885.3_FGT009	1	24.092	1	20	484	503	UGCCUGGCUCCCUGUAUGCC	GGCAUACUGGGAGCCAGGCA	Cleavage	seq=cds; coord=2:168321269..168322176:-1; parent_gene=AC207885.3_FG009	1
zma-miR160a-5p	gnl|ZmGDB|GRMZM2G081406_T01	1	22.146	1	20	1372	1391	UGCCUGGCUCCCUGUAUGCC	GCCAUACAGGGAGCCAGGCA	Cleavage	seq=cds; coord=4:143802561..143805351:1; parent_gene=GRMZM2G081406	1
zma-miR160a-5p	gnl|ZmGDB|GRMZM2G481360_T01	1.5	19.367	1	20	1260	1279	UGCCUGGCUCCCUGUAUGCC	GGCAUCCGGGGAGCCAGGCA	Cleavage	seq=cds; coord=10:125546366..125549564:1; parent_gene=GRMZM2G481360	1
zma-miR160a-5p	gnl|ZmGDB|GRMZM2G458180_T01	1.5	17.352	1	20	1422	1441	UGCCUGGCUCCCUGUAUGCC	GGCAUCCGGGGAGCCAGGCA	Cleavage	seq=cds; coord=3:109713094..109716519:-1; parent_gene=GRMZM2G458180	1
zma-miR160a-5p	gnl|ZmGDB|GRMZM2G162809_T01	2.5	18.64	1	20	437	456	UGCCUGGCUCCCUGUAUGCC	AGCGUACAGUGAGCCAGGCA	Translation	seq=cds; coord=5:189764162..189765024:-1; parent_gene=GRMZM2G162809	1
zma-miR160a-5p	gnl|ZmGDB|GRMZM2G077386_T01	2.5	18.446	1	20	131	150	UGCCUGGCUCCCUGUAUGCC	GGCGUACAUUGAGCCAGGCA	Translation	seq=cds; coord=7:134316140..134316558:1; parent_gene=GRMZM2G077386	1
zma-miR160a-5p	gnl|ZmGDB|GRMZM5G861501_T01	3	22.084	1	20	502	521	UGCCUGGCUCCCUGUAUGCC	GGCAUGGAGGGAGCCAAGCA	Cleavage	seq=cds; coord=9:9361617..9363747:-1; parent_gene=GRMZM5G861501	1
zma-miR160a-3p	gnl|ZmGDB|GRMZM2G430224_T01	3	16.871	1	21	309	329	GCGUGCAAGGGGCCAAGCAUG	CAUGCUCCGCUCCUUGUACGC	Cleavage	seq=cds; coord=5:145334846..145337513:-1; parent_gene=GRMZM2G430224	1
zma-miR160a-3p	gnl|ZmGDB|AC205552.3_FGT003	3	16.871	1	21	309	329	GCGUGCAAGGGGCCAAGCAUG	CAUGCUCCGCUCCUUGUACGC	Cleavage	seq=cds; coord=4:135373558..135374737:1; parent_gene=AC205552.3_FG003	1
zma-miR160a-3p	gnl|ZmGDB|GRMZM2G149211_T01	3	17.879	1	20	799	818	GCGUGCAAGGGGCCAAGCAU	AUGCUAGGUGCCUUGCAUGC	Translation	seq=cds; coord=8:114426296..114431050:-1; parent_gene=GRMZM2G149211	1
zma-miR160a-3p	gnl|ZmGDB|GRMZM2G035298_T02	3	17.717	1	20	799	818	GCGUGCAAGGGGCCAAGCAU	AUGCUAGGUGCCUUGCAUGC	Translation	seq=cds; coord=6:144337071..144376854:-1; parent_gene=GRMZM2G035298	1
zma-miR160c-5p	gnl|ZmGDB|GRMZM2G567718_T01	0	12.852	1	21	6	26	UGCCUGGCUCCCUGUAUGCCA	UGGCAUACAGGGAGCCAGGCA	Cleavage	seq=cds; coord=6:9144425..9144859:-1; parent_gene=GRMZM2G567718	1
zma-miR160c-5p	gnl|ZmGDB|GRMZM2G159399_T01	0	21.942	1	20	1315	1334	UGCCUGGCUCCCUGUAUGCC	GGCAUACAGGGAGCCAGGCA	Cleavage	seq=cds; coord=5:27944757..27949513:-1; parent_gene=GRMZM2G159399	1
zma-miR160c-5p	gnl|ZmGDB|AC207656.3_FGT002	0	24.063	1	20	1351	1370	UGCCUGGCUCCCUGUAUGCC	GGCAUACAGGGAGCCAGGCA	Cleavage	seq=cds; coord=5:49253260..49255662:1; parent_gene=AC207656.3_FG002	1
zma-miR160c-5p	gnl|ZmGDB|AC207885.3_FGT009	1	24.092	1	20	484	503	UGCCUGGCUCCCUGUAUGCC	GGCAUACUGGGAGCCAGGCA	Cleavage	seq=cds; coord=2:168321269..168322176:-1; parent_gene=AC207885.3_FG009	1
zma-miR160c-5p	gnl|ZmGDB|GRMZM2G081406_T01	1	22.146	1	20	1372	1391	UGCCUGGCUCCCUGUAUGCC	GCCAUACAGGGAGCCAGGCA	Cleavage	seq=cds; coord=4:143802561..143805351:1; parent_gene=GRMZM2G081406	1
zma-miR160c-5p	gnl|ZmGDB|GRMZM2G481360_T01	1.5	19.367	1	20	1260	1279	UGCCUGGCUCCCUGUAUGCC	GGCAUCCGGGGAGCCAGGCA	Cleavage	seq=cds; coord=10:125546366..125549564:1; parent_gene=GRMZM2G481360	1
zma-miR160c-5p	gnl|ZmGDB|GRMZM2G458180_T01	1.5	17.352	1	20	1422	1441	UGCCUGGCUCCCUGUAUGCC	GGCAUCCGGGGAGCCAGGCA	Cleavage	seq=cds; coord=3:109713094..109716519:-1; parent_gene=GRMZM2G458180	1
zma-miR160c-5p	gnl|ZmGDB|GRMZM2G162809_T01	2.5	18.64	1	20	437	456	UGCCUGGCUCCCUGUAUGCC	AGCGUACAGUGAGCCAGGCA	Translation	seq=cds; coord=5:189764162..189765024:-1; parent_gene=GRMZM2G162809	1
zma-miR160c-5p	gnl|ZmGDB|GRMZM2G077386_T01	2.5	18.446	1	20	131	150	UGCCUGGCUCCCUGUAUGCC	GGCGUACAUUGAGCCAGGCA	Translation	seq=cds; coord=7:134316140..134316558:1; parent_gene=GRMZM2G077386	1
zma-miR160c-5p	gnl|ZmGDB|GRMZM5G861501_T01	3	22.084	1	20	502	521	UGCCUGGCUCCCUGUAUGCC	GGCAUGGAGGGAGCCAAGCA	Cleavage	seq=cds; coord=9:9361617..9363747:-1; parent_gene=GRMZM5G861501	1
zma-miR160c-3p	gnl|ZmGDB|AC211347.4_FGT007	3	24.099	1	20	28	47	GCGUGCAUGGUGCCAAGCAU	GUGCUUGUCACCAUGCUCGC	Cleavage	seq=cds; coord=2:150100694..150102594:-1; parent_gene=AC211347.4_FG007	1
zma-miR160c-3p	gnl|ZmGDB|GRMZM5G893219_T01	3	21.375	1	20	1	20	GCGUGCAUGGUGCCAAGCAU	AUGCUUGGAGGUAUGCACGC	Translation	seq=cds; coord=3:205846289..205846408:1; parent_gene=GRMZM5G893219	1
zma-miR160d-5p	gnl|ZmGDB|GRMZM2G567718_T01	0	12.852	1	21	6	26	UGCCUGGCUCCCUGUAUGCCA	UGGCAUACAGGGAGCCAGGCA	Cleavage	seq=cds; coord=6:9144425..9144859:-1; parent_gene=GRMZM2G567718	1
zma-miR160d-5p	gnl|ZmGDB|GRMZM2G159399_T01	0	21.942	1	20	1315	1334	UGCCUGGCUCCCUGUAUGCC	GGCAUACAGGGAGCCAGGCA	Cleavage	seq=cds; coord=5:27944757..27949513:-1; parent_gene=GRMZM2G159399	1
zma-miR160d-5p	gnl|ZmGDB|AC207656.3_FGT002	0	24.063	1	20	1351	1370	UGCCUGGCUCCCUGUAUGCC	GGCAUACAGGGAGCCAGGCA	Cleavage	seq=cds; coord=5:49253260..49255662:1; parent_gene=AC207656.3_FG002	1
zma-miR160d-5p	gnl|ZmGDB|AC207885.3_FGT009	1	24.092	1	20	484	503	UGCCUGGCUCCCUGUAUGCC	GGCAUACUGGGAGCCAGGCA	Cleavage	seq=cds; coord=2:168321269..168322176:-1; parent_gene=AC207885.3_FG009	1
zma-miR160d-5p	gnl|ZmGDB|GRMZM2G081406_T01	1	22.146	1	20	1372	1391	UGCCUGGCUCCCUGUAUGCC	GCCAUACAGGGAGCCAGGCA	Cleavage	seq=cds; coord=4:143802561..143805351:1; parent_gene=GRMZM2G081406	1
zma-miR160d-5p	gnl|ZmGDB|GRMZM2G481360_T01	1.5	19.367	1	20	1260	1279	UGCCUGGCUCCCUGUAUGCC	GGCAUCCGGGGAGCCAGGCA	Cleavage	seq=cds; coord=10:125546366..125549564:1; parent_gene=GRMZM2G481360	1
zma-miR160d-5p	gnl|ZmGDB|GRMZM2G458180_T01	1.5	17.352	1	20	1422	1441	UGCCUGGCUCCCUGUAUGCC	GGCAUCCGGGGAGCCAGGCA	Cleavage	seq=cds; coord=3:109713094..109716519:-1; parent_gene=GRMZM2G458180	1
zma-miR160d-5p	gnl|ZmGDB|GRMZM2G162809_T01	2.5	18.64	1	20	437	456	UGCCUGGCUCCCUGUAUGCC	AGCGUACAGUGAGCCAGGCA	Translation	seq=cds; coord=5:189764162..189765024:-1; parent_gene=GRMZM2G162809	1
zma-miR160d-5p	gnl|ZmGDB|GRMZM2G077386_T01	2.5	18.446	1	20	131	150	UGCCUGGCUCCCUGUAUGCC	GGCGUACAUUGAGCCAGGCA	Translation	seq=cds; coord=7:134316140..134316558:1; parent_gene=GRMZM2G077386	1
zma-miR160d-5p	gnl|ZmGDB|GRMZM5G861501_T01	3	22.084	1	20	502	521	UGCCUGGCUCCCUGUAUGCC	GGCAUGGAGGGAGCCAAGCA	Cleavage	seq=cds; coord=9:9361617..9363747:-1; parent_gene=GRMZM5G861501	1
zma-miR160d-3p	gnl|ZmGDB|GRMZM5G832381_T01	3	21.957	1	21	440	460	GCGUGCGUGGAGCCAAGCAUG	CGAGCUUGGCUCCGUGCGCGC	Cleavage	seq=cds; coord=5:70548256..70549346:-1; parent_gene=GRMZM5G832381	1
zma-miR160b-5p	gnl|ZmGDB|GRMZM2G567718_T01	0	12.852	1	21	6	26	UGCCUGGCUCCCUGUAUGCCA	UGGCAUACAGGGAGCCAGGCA	Cleavage	seq=cds; coord=6:9144425..9144859:-1; parent_gene=GRMZM2G567718	1
zma-miR160b-5p	gnl|ZmGDB|GRMZM2G159399_T01	0	21.942	1	20	1315	1334	UGCCUGGCUCCCUGUAUGCC	GGCAUACAGGGAGCCAGGCA	Cleavage	seq=cds; coord=5:27944757..27949513:-1; parent_gene=GRMZM2G159399	1
zma-miR160b-5p	gnl|ZmGDB|AC207656.3_FGT002	0	24.063	1	20	1351	1370	UGCCUGGCUCCCUGUAUGCC	GGCAUACAGGGAGCCAGGCA	Cleavage	seq=cds; coord=5:49253260..49255662:1; parent_gene=AC207656.3_FG002	1
zma-miR160b-5p	gnl|ZmGDB|AC207885.3_FGT009	1	24.092	1	20	484	503	UGCCUGGCUCCCUGUAUGCC	GGCAUACUGGGAGCCAGGCA	Cleavage	seq=cds; coord=2:168321269..168322176:-1; parent_gene=AC207885.3_FG009	1
zma-miR160b-5p	gnl|ZmGDB|GRMZM2G081406_T01	1	22.146	1	20	1372	1391	UGCCUGGCUCCCUGUAUGCC	GCCAUACAGGGAGCCAGGCA	Cleavage	seq=cds; coord=4:143802561..143805351:1; parent_gene=GRMZM2G081406	1
zma-miR160b-5p	gnl|ZmGDB|GRMZM2G481360_T01	1.5	19.367	1	20	1260	1279	UGCCUGGCUCCCUGUAUGCC	GGCAUCCGGGGAGCCAGGCA	Cleavage	seq=cds; coord=10:125546366..125549564:1; parent_gene=GRMZM2G481360	1
zma-miR160b-5p	gnl|ZmGDB|GRMZM2G458180_T01	1.5	17.352	1	20	1422	1441	UGCCUGGCUCCCUGUAUGCC	GGCAUCCGGGGAGCCAGGCA	Cleavage	seq=cds; coord=3:109713094..109716519:-1; parent_gene=GRMZM2G458180	1
zma-miR160b-5p	gnl|ZmGDB|GRMZM2G162809_T01	2.5	18.64	1	20	437	456	UGCCUGGCUCCCUGUAUGCC	AGCGUACAGUGAGCCAGGCA	Translation	seq=cds; coord=5:189764162..189765024:-1; parent_gene=GRMZM2G162809	1
zma-miR160b-5p	gnl|ZmGDB|GRMZM2G077386_T01	2.5	18.446	1	20	131	150	UGCCUGGCUCCCUGUAUGCC	GGCGUACAUUGAGCCAGGCA	Translation	seq=cds; coord=7:134316140..134316558:1; parent_gene=GRMZM2G077386	1
zma-miR160b-5p	gnl|ZmGDB|GRMZM5G861501_T01	3	22.084	1	20	502	521	UGCCUGGCUCCCUGUAUGCC	GGCAUGGAGGGAGCCAAGCA	Cleavage	seq=cds; coord=9:9361617..9363747:-1; parent_gene=GRMZM5G861501	1
zma-miR160b-3p	gnl|ZmGDB|GRMZM2G430224_T01	2.5	16.871	1	21	309	329	GCGUGCAAGGAGCCAAGCAUG	CAUGCUCCGCUCCUUGUACGC	Cleavage	seq=cds; coord=5:145334846..145337513:-1; parent_gene=GRMZM2G430224	1
zma-miR160b-3p	gnl|ZmGDB|AC205552.3_FGT003	2.5	16.871	1	21	309	329	GCGUGCAAGGAGCCAAGCAUG	CAUGCUCCGCUCCUUGUACGC	Cleavage	seq=cds; coord=4:135373558..135374737:1; parent_gene=AC205552.3_FG003	1
zma-miR160b-3p	gnl|ZmGDB|GRMZM2G703085_T01	3	14.64	1	21	131	151	GCGUGCAAGGAGCCAAGCAUG	CGUGUUUGGUUCGUUGUACGC	Translation	seq=cds; coord=2:74076783..74078313:1; parent_gene=GRMZM2G703085	1
zma-miR160b-3p	gnl|ZmGDB|GRMZM2G156162_T06	3	24.707	1	21	388	408	GCGUGCAAGGAGCCAAGCAUG	CAUGCUUCACUCCUUGCAUGU	Cleavage	seq=cds; coord=6:87797801..87803051:-1; parent_gene=GRMZM2G156162	1
zma-miR160b-3p	gnl|ZmGDB|GRMZM2G156162_T02	3	24.707	1	21	388	408	GCGUGCAAGGAGCCAAGCAUG	CAUGCUUCACUCCUUGCAUGU	Cleavage	seq=cds; coord=6:87797801..87803088:-1; parent_gene=GRMZM2G156162	1
zma-miR160b-3p	gnl|ZmGDB|GRMZM2G156162_T01	3	24.707	1	21	388	408	GCGUGCAAGGAGCCAAGCAUG	CAUGCUUCACUCCUUGCAUGU	Cleavage	seq=cds; coord=6:87797801..87803088:-1; parent_gene=GRMZM2G156162	1
zma-miR160b-3p	gnl|ZmGDB|GRMZM5G832381_T01	3	21.957	1	21	440	460	GCGUGCAAGGAGCCAAGCAUG	CGAGCUUGGCUCCGUGCGCGC	Cleavage	seq=cds; coord=5:70548256..70549346:-1; parent_gene=GRMZM5G832381	1
zma-miR160b-3p	gnl|ZmGDB|GRMZM2G149211_T01	3	17.879	1	20	799	818	GCGUGCAAGGAGCCAAGCAU	AUGCUAGGUGCCUUGCAUGC	Translation	seq=cds; coord=8:114426296..114431050:-1; parent_gene=GRMZM2G149211	1
zma-miR160b-3p	gnl|ZmGDB|GRMZM2G035298_T02	3	17.717	1	20	799	818	GCGUGCAAGGAGCCAAGCAU	AUGCUAGGUGCCUUGCAUGC	Translation	seq=cds; coord=6:144337071..144376854:-1; parent_gene=GRMZM2G035298	1
zma-miR164a-5p	gnl|ZmGDB|GRMZM2G139700_T01	1	20.392	1	20	738	757	UGGAGAAGCAGGGCACGUGC	GCUCGUGCCCUGCUUCUCCA	Cleavage	seq=cds; coord=3:137579039..137580848:1; parent_gene=GRMZM2G139700	1
zma-miR164a-5p	gnl|ZmGDB|GRMZM2G393433_T02	1	17.089	1	20	759	778	UGGAGAAGCAGGGCACGUGC	GCUCGUGCCCUGCUUCUCCA	Cleavage	seq=cds; coord=6:16291162..16293314:-1; parent_gene=GRMZM2G393433	1
zma-miR164a-5p	gnl|ZmGDB|GRMZM2G393433_T01	1	17.089	1	20	756	775	UGGAGAAGCAGGGCACGUGC	GCUCGUGCCCUGCUUCUCCA	Cleavage	seq=cds; coord=6:16291273..16293492:-1; parent_gene=GRMZM2G393433	1
zma-miR164a-5p	gnl|ZmGDB|GRMZM2G114850_T01	1	20.062	1	20	699	718	UGGAGAAGCAGGGCACGUGC	GCAGGUGCCCUGCUUCUCCA	Cleavage	seq=cds; coord=3:122071793..122076122:1; parent_gene=GRMZM2G114850	1
zma-miR164a-5p	gnl|ZmGDB|GRMZM2G063522_T01	1	19.743	1	20	660	679	UGGAGAAGCAGGGCACGUGC	GCAAGUGCCCUGCUUCUCCA	Cleavage	seq=cds; coord=5:43417416..43421787:-1; parent_gene=GRMZM2G063522	1
zma-miR164a-5p	gnl|ZmGDB|GRMZM2G146380_T01	2	17.042	1	20	435	454	UGGAGAAGCAGGGCACGUGC	ACACGUGACCUGCUUCUCCA	Cleavage	seq=cds; coord=5:176939481..176940584:-1; parent_gene=GRMZM2G146380	1
zma-miR164a-5p	gnl|ZmGDB|GRMZM2G058494_T01	2.5	23.502	1	21	37	57	UGGAGAAGCAGGGCACGUGCA	UGGACGUGCUCUCCUUCUCCA	Translation	seq=cds; coord=7:139562397..139563319:-1; parent_gene=GRMZM2G058494	1
zma-miR164a-5p	gnl|ZmGDB|GRMZM2G101033_T01	2.5	17.548	1	20	380	399	UGGAGAAGCAGGGCACGUGC	GCAUGUCUUCUGCUUCUCCA	Cleavage	seq=cds; coord=8:158564706..158565559:1; parent_gene=GRMZM2G101033	1
zma-miR164a-5p	gnl|ZmGDB|GRMZM2G011553_T01	3	19.012	1	21	497	517	UGGAGAAGCAGGGCACGUGCA	UGCGCCUGCCCUCCUUCUCCG	Translation	seq=cds; coord=3:1677728..1678921:-1; parent_gene=GRMZM2G011553	1
zma-miR164a-3p	gnl|ZmGDB|AC214126.4_FGT006	1.5	17.051	1	20	1	20	CACGUGUUCUCCUUCUCCAU	AUGGAGCAGGAGAGCACGUG	Cleavage	seq=cds; coord=1:245846638..245846907:-1; parent_gene=AC214126.4_FG006	1
zma-miR164a-3p	gnl|ZmGDB|AC205014.4_FGT001	3	24.567	1	21	99	119	CACGUGUUCUCCUUCUCCAUC	GGUGGAGAAGGAGCACAUGUU	Cleavage	seq=cds; coord=10:81831737..81831925:-1; parent_gene=AC205014.4_FG001	1
zma-miR164a-3p	gnl|ZmGDB|GRMZM2G158474_T01	2	19.242	1	20	1099	1118	CACGUGUUCUCCUUCUCCAU	AUGGAGAAGGAGAAUACUUG	Cleavage	seq=cds; coord=10:121215443..121220827:1; parent_gene=GRMZM2G158474	1
zma-miR164a-3p	gnl|ZmGDB|GRMZM2G001097_T01	2.5	15.982	1	21	399	419	CACGUGUUCUCCUUCUCCAUC	GAUGGAGAUGGAGAAUGUGUG	Cleavage	seq=cds; coord=5:182573856..182576166:1; parent_gene=GRMZM2G001097	1
zma-miR164a-3p	gnl|ZmGDB|GRMZM2G001097_T02	2.5	15.982	1	21	399	419	CACGUGUUCUCCUUCUCCAUC	GAUGGAGAUGGAGAAUGUGUG	Cleavage	seq=cds; coord=5:182573909..182576166:1; parent_gene=GRMZM2G001097	1
zma-miR164a-3p	gnl|ZmGDB|GRMZM2G001097_T03	2.5	15.982	1	21	399	419	CACGUGUUCUCCUUCUCCAUC	GAUGGAGAUGGAGAAUGUGUG	Cleavage	seq=cds; coord=5:182574420..182576154:1; parent_gene=GRMZM2G001097	1
zma-miR164a-3p	gnl|ZmGDB|AC199767.4_FGT002	2	18.364	1	20	1	20	CACGUGUUCUCCUUCUCCAU	AUGGAGCAGGAGAGCGCGUG	Cleavage	seq=cds; coord=8:159655366..159655767:-1; parent_gene=AC199767.4_FG002	1
zma-miR164a-3p	gnl|ZmGDB|GRMZM2G700742_T01	2	18.364	1	20	1	20	CACGUGUUCUCCUUCUCCAU	AUGGAGCAGGAGAGCGCGUG	Cleavage	seq=cds; coord=8:159650571..159650972:-1; parent_gene=GRMZM2G700742	1
zma-miR164a-3p	gnl|ZmGDB|AC209698.3_FGT004	2	18.364	1	20	1	20	CACGUGUUCUCCUUCUCCAU	AUGGAGCAGGAGAGCGCGUG	Cleavage	seq=cds; coord=1:195144976..195145377:1; parent_gene=AC209698.3_FG004	1
zma-miR164a-3p	gnl|ZmGDB|GRMZM2G354500_T01	2.5	20.382	1	21	139	159	CACGUGUUCUCCUUCUCCAUC	GCUGGAGAAGGAGCACAUGUG	Cleavage	seq=cds; coord=4:54082562..54083083:-1; parent_gene=GRMZM2G354500	1
zma-miR164a-3p	gnl|ZmGDB|GRMZM2G423351_T01	2.5	18.935	1	21	130	150	CACGUGUUCUCCUUCUCCAUC	GCUGGAGAAGGAGCACAUGUG	Cleavage	seq=cds; coord=5:170185626..170186074:-1; parent_gene=GRMZM2G423351	1
zma-miR164a-3p	gnl|ZmGDB|GRMZM5G806430_T01	3	24.368	1	21	99	119	CACGUGUUCUCCUUCUCCAUC	GGUGGAGAAGGAGCACAUGUU	Cleavage	seq=cds; coord=8:76442128..76443351:-1; parent_gene=GRMZM5G806430	1
zma-miR164a-3p	gnl|ZmGDB|GRMZM2G098443_T01	3	24.054	1	21	99	119	CACGUGUUCUCCUUCUCCAUC	GGUGGAGAAGGAGCACAUGUU	Cleavage	seq=cds; coord=8:96690277..96691143:1; parent_gene=GRMZM2G098443	1
zma-miR164a-3p	gnl|ZmGDB|GRMZM2G082227_T01	3	21.977	1	21	93	113	CACGUGUUCUCCUUCUCCAUC	GGUGGAGAAGGAGCACAUGUU	Cleavage	seq=cds; coord=1:4547696..4549322:1; parent_gene=GRMZM2G082227	1
zma-miR164a-3p	gnl|ZmGDB|GRMZM2G136616_T01	3	24.368	1	21	99	119	CACGUGUUCUCCUUCUCCAUC	GGUGGAGAAGGAGCACAUGUU	Cleavage	seq=cds; coord=1:163310053..163311736:-1; parent_gene=GRMZM2G136616	1
zma-miR164a-3p	gnl|ZmGDB|GRMZM5G865595_T01	3	23.751	1	21	429	449	CACGUGUUCUCCUUCUCCAUC	GGCGGAGAAGGAGAACAUGUU	Cleavage	seq=cds; coord=9:15616618..15617933:-1; parent_gene=GRMZM5G865595	1
zma-miR164d-5p	gnl|ZmGDB|GRMZM2G139700_T01	1	20.392	1	20	738	757	UGGAGAAGCAGGGCACGUGC	GCUCGUGCCCUGCUUCUCCA	Cleavage	seq=cds; coord=3:137579039..137580848:1; parent_gene=GRMZM2G139700	1
zma-miR164d-5p	gnl|ZmGDB|GRMZM2G393433_T02	1	17.089	1	20	759	778	UGGAGAAGCAGGGCACGUGC	GCUCGUGCCCUGCUUCUCCA	Cleavage	seq=cds; coord=6:16291162..16293314:-1; parent_gene=GRMZM2G393433	1
zma-miR164d-5p	gnl|ZmGDB|GRMZM2G393433_T01	1	17.089	1	20	756	775	UGGAGAAGCAGGGCACGUGC	GCUCGUGCCCUGCUUCUCCA	Cleavage	seq=cds; coord=6:16291273..16293492:-1; parent_gene=GRMZM2G393433	1
zma-miR164d-5p	gnl|ZmGDB|GRMZM2G114850_T01	1	20.062	1	20	699	718	UGGAGAAGCAGGGCACGUGC	GCAGGUGCCCUGCUUCUCCA	Cleavage	seq=cds; coord=3:122071793..122076122:1; parent_gene=GRMZM2G114850	1
zma-miR164d-5p	gnl|ZmGDB|GRMZM2G063522_T01	1	19.743	1	20	660	679	UGGAGAAGCAGGGCACGUGC	GCAAGUGCCCUGCUUCUCCA	Cleavage	seq=cds; coord=5:43417416..43421787:-1; parent_gene=GRMZM2G063522	1
zma-miR164d-5p	gnl|ZmGDB|GRMZM2G146380_T01	2	17.042	1	20	435	454	UGGAGAAGCAGGGCACGUGC	ACACGUGACCUGCUUCUCCA	Cleavage	seq=cds; coord=5:176939481..176940584:-1; parent_gene=GRMZM2G146380	1
zma-miR164d-5p	gnl|ZmGDB|GRMZM2G058494_T01	2.5	23.502	1	21	37	57	UGGAGAAGCAGGGCACGUGCA	UGGACGUGCUCUCCUUCUCCA	Translation	seq=cds; coord=7:139562397..139563319:-1; parent_gene=GRMZM2G058494	1
zma-miR164d-5p	gnl|ZmGDB|GRMZM2G101033_T01	2.5	17.548	1	20	380	399	UGGAGAAGCAGGGCACGUGC	GCAUGUCUUCUGCUUCUCCA	Cleavage	seq=cds; coord=8:158564706..158565559:1; parent_gene=GRMZM2G101033	1
zma-miR164d-5p	gnl|ZmGDB|GRMZM2G011553_T01	3	19.012	1	21	497	517	UGGAGAAGCAGGGCACGUGCA	UGCGCCUGCCCUCCUUCUCCG	Translation	seq=cds; coord=3:1677728..1678921:-1; parent_gene=GRMZM2G011553	1
zma-miR164d-3p	gnl|ZmGDB|GRMZM5G897073_T05	2	23.11	1	20	285	304	CACGUGGUCUCCUUCUCCAU	AUGGAGAAGGAGCCCACGUU	Cleavage	seq=cds; coord=9:27538302..27543501:-1; parent_gene=GRMZM5G897073	1
zma-miR164d-3p	gnl|ZmGDB|GRMZM2G304079_T03	2	22.389	1	20	1	20	CACGUGGUCUCCUUCUCCAU	AUGGAGAAGGAGCCCACGUU	Cleavage	seq=cds; coord=7:88153195..88157571:1; parent_gene=GRMZM2G304079	1
zma-miR164d-3p	gnl|ZmGDB|AC214126.4_FGT006	2.5	17.051	1	20	1	20	CACGUGGUCUCCUUCUCCAU	AUGGAGCAGGAGAGCACGUG	Cleavage	seq=cds; coord=1:245846638..245846907:-1; parent_gene=AC214126.4_FG006	1
zma-miR164d-3p	gnl|ZmGDB|GRMZM2G157246_T01	3	17.387	1	20	64	83	CACGUGGUCUCCUUCUCCAU	AUGGGGGAGGAGAUCAAGUG	Cleavage	seq=cds; coord=6:155209597..155211853:-1; parent_gene=GRMZM2G157246	1
zma-miR164d-3p	gnl|ZmGDB|GRMZM2G140917_T01	2.5	22.236	1	20	992	1011	CACGUGGUCUCCUUCUCCAU	GUGCAGAGGGAGAUCACGUG	Cleavage	seq=cds; coord=6:86747563..86755916:1; parent_gene=GRMZM2G140917	1
zma-miR164d-3p	gnl|ZmGDB|GRMZM2G700742_T01	3	18.364	1	20	1	20	CACGUGGUCUCCUUCUCCAU	AUGGAGCAGGAGAGCGCGUG	Cleavage	seq=cds; coord=8:159650571..159650972:-1; parent_gene=GRMZM2G700742	1
zma-miR164d-3p	gnl|ZmGDB|AC209698.3_FGT004	3	18.364	1	20	1	20	CACGUGGUCUCCUUCUCCAU	AUGGAGCAGGAGAGCGCGUG	Cleavage	seq=cds; coord=1:195144976..195145377:1; parent_gene=AC209698.3_FG004	1
zma-miR164d-3p	gnl|ZmGDB|AC199767.4_FGT002	3	18.364	1	20	1	20	CACGUGGUCUCCUUCUCCAU	AUGGAGCAGGAGAGCGCGUG	Cleavage	seq=cds; coord=8:159655366..159655767:-1; parent_gene=AC199767.4_FG002	1
zma-miR164b-5p	gnl|ZmGDB|GRMZM2G139700_T01	1	20.392	1	20	738	757	UGGAGAAGCAGGGCACGUGC	GCUCGUGCCCUGCUUCUCCA	Cleavage	seq=cds; coord=3:137579039..137580848:1; parent_gene=GRMZM2G139700	1
zma-miR164b-5p	gnl|ZmGDB|GRMZM2G393433_T02	1	17.089	1	20	759	778	UGGAGAAGCAGGGCACGUGC	GCUCGUGCCCUGCUUCUCCA	Cleavage	seq=cds; coord=6:16291162..16293314:-1; parent_gene=GRMZM2G393433	1
zma-miR164b-5p	gnl|ZmGDB|GRMZM2G393433_T01	1	17.089	1	20	756	775	UGGAGAAGCAGGGCACGUGC	GCUCGUGCCCUGCUUCUCCA	Cleavage	seq=cds; coord=6:16291273..16293492:-1; parent_gene=GRMZM2G393433	1
zma-miR164b-5p	gnl|ZmGDB|GRMZM2G114850_T01	1	20.062	1	20	699	718	UGGAGAAGCAGGGCACGUGC	GCAGGUGCCCUGCUUCUCCA	Cleavage	seq=cds; coord=3:122071793..122076122:1; parent_gene=GRMZM2G114850	1
zma-miR164b-5p	gnl|ZmGDB|GRMZM2G063522_T01	1	19.743	1	20	660	679	UGGAGAAGCAGGGCACGUGC	GCAAGUGCCCUGCUUCUCCA	Cleavage	seq=cds; coord=5:43417416..43421787:-1; parent_gene=GRMZM2G063522	1
zma-miR164b-5p	gnl|ZmGDB|GRMZM2G146380_T01	2	17.042	1	20	435	454	UGGAGAAGCAGGGCACGUGC	ACACGUGACCUGCUUCUCCA	Cleavage	seq=cds; coord=5:176939481..176940584:-1; parent_gene=GRMZM2G146380	1
zma-miR164b-5p	gnl|ZmGDB|GRMZM2G058494_T01	2.5	23.502	1	21	37	57	UGGAGAAGCAGGGCACGUGCA	UGGACGUGCUCUCCUUCUCCA	Translation	seq=cds; coord=7:139562397..139563319:-1; parent_gene=GRMZM2G058494	1
zma-miR164b-5p	gnl|ZmGDB|GRMZM2G101033_T01	2.5	17.548	1	20	380	399	UGGAGAAGCAGGGCACGUGC	GCAUGUCUUCUGCUUCUCCA	Cleavage	seq=cds; coord=8:158564706..158565559:1; parent_gene=GRMZM2G101033	1
zma-miR164b-5p	gnl|ZmGDB|GRMZM2G011553_T01	3	19.012	1	21	497	517	UGGAGAAGCAGGGCACGUGCA	UGCGCCUGCCCUCCUUCUCCG	Translation	seq=cds; coord=3:1677728..1678921:-1; parent_gene=GRMZM2G011553	1
zma-miR164b-3p	gnl|ZmGDB|GRMZM2G334631_T01	2.5	21.166	1	20	27	46	AUGUGCCCAUCUUCUCCACC	GGUGGAUAAGAUGGGAACAU	Cleavage	seq=cds; coord=4:6685884..6686446:1; parent_gene=GRMZM2G334631	1
zma-miR164b-3p	gnl|ZmGDB|GRMZM2G128319_T01	2	18.843	1	20	1663	1682	AUGUGCCCAUCUUCUCCACC	GUUCGAGAAGAUGGGCACAU	Cleavage	seq=cds; coord=10:113827557..113831463:-1; parent_gene=GRMZM2G128319	1
zma-miR164b-3p	gnl|ZmGDB|GRMZM2G078806_T05	3	17.183	1	20	342	361	AUGUGCCCAUCUUCUCCACC	GGUGGAGAGGAAGGACACAU	Translation	seq=cds; coord=1:66015021..66017039:-1; parent_gene=GRMZM2G078806	1
zma-miR164b-3p	gnl|ZmGDB|GRMZM2G013152_T01	3	23.044	1	20	705	724	AUGUGCCCAUCUUCUCCACC	GAUGGAGAGGAUGCGCACAU	Cleavage	seq=cds; coord=6:5508296..5511049:-1; parent_gene=GRMZM2G013152	1
zma-miR164b-3p	gnl|ZmGDB|GRMZM2G078806_T03	3	23.94	1	20	330	349	AUGUGCCCAUCUUCUCCACC	GGUGGAGAGGAAGGACACAU	Translation	seq=cds; coord=1:66013048..66017039:-1; parent_gene=GRMZM2G078806	1
zma-miR164b-3p	gnl|ZmGDB|GRMZM2G078806_T02	3	18.584	1	20	342	361	AUGUGCCCAUCUUCUCCACC	GGUGGAGAGGAAGGACACAU	Translation	seq=cds; coord=1:66013048..66017039:-1; parent_gene=GRMZM2G078806	1
zma-miR164b-3p	gnl|ZmGDB|GRMZM2G028733_T02	2.5	16.941	1	20	1783	1802	AUGUGCCCAUCUUCUCCACC	GGUGGAGGUGAUUGGCACAU	Cleavage	seq=cds; coord=8:136579799..136603057:1; parent_gene=GRMZM2G028733	1
zma-miR164c-5p	gnl|ZmGDB|GRMZM2G139700_T01	1	20.392	1	20	738	757	UGGAGAAGCAGGGCACGUGC	GCUCGUGCCCUGCUUCUCCA	Cleavage	seq=cds; coord=3:137579039..137580848:1; parent_gene=GRMZM2G139700	1
zma-miR164c-5p	gnl|ZmGDB|GRMZM2G393433_T02	1	17.089	1	20	759	778	UGGAGAAGCAGGGCACGUGC	GCUCGUGCCCUGCUUCUCCA	Cleavage	seq=cds; coord=6:16291162..16293314:-1; parent_gene=GRMZM2G393433	1
zma-miR164c-5p	gnl|ZmGDB|GRMZM2G393433_T01	1	17.089	1	20	756	775	UGGAGAAGCAGGGCACGUGC	GCUCGUGCCCUGCUUCUCCA	Cleavage	seq=cds; coord=6:16291273..16293492:-1; parent_gene=GRMZM2G393433	1
zma-miR164c-5p	gnl|ZmGDB|GRMZM2G114850_T01	1	20.062	1	20	699	718	UGGAGAAGCAGGGCACGUGC	GCAGGUGCCCUGCUUCUCCA	Cleavage	seq=cds; coord=3:122071793..122076122:1; parent_gene=GRMZM2G114850	1
zma-miR164c-5p	gnl|ZmGDB|GRMZM2G063522_T01	1	19.743	1	20	660	679	UGGAGAAGCAGGGCACGUGC	GCAAGUGCCCUGCUUCUCCA	Cleavage	seq=cds; coord=5:43417416..43421787:-1; parent_gene=GRMZM2G063522	1
zma-miR164c-5p	gnl|ZmGDB|GRMZM2G146380_T01	2	17.042	1	20	435	454	UGGAGAAGCAGGGCACGUGC	ACACGUGACCUGCUUCUCCA	Cleavage	seq=cds; coord=5:176939481..176940584:-1; parent_gene=GRMZM2G146380	1
zma-miR164c-5p	gnl|ZmGDB|GRMZM2G058494_T01	2.5	23.502	1	21	37	57	UGGAGAAGCAGGGCACGUGCA	UGGACGUGCUCUCCUUCUCCA	Translation	seq=cds; coord=7:139562397..139563319:-1; parent_gene=GRMZM2G058494	1
zma-miR164c-5p	gnl|ZmGDB|GRMZM2G101033_T01	2.5	17.548	1	20	380	399	UGGAGAAGCAGGGCACGUGC	GCAUGUCUUCUGCUUCUCCA	Cleavage	seq=cds; coord=8:158564706..158565559:1; parent_gene=GRMZM2G101033	1
zma-miR164c-5p	gnl|ZmGDB|GRMZM2G011553_T01	3	19.012	1	21	497	517	UGGAGAAGCAGGGCACGUGCA	UGCGCCUGCCCUCCUUCUCCG	Translation	seq=cds; coord=3:1677728..1678921:-1; parent_gene=GRMZM2G011553	1
zma-miR164c-3p	gnl|ZmGDB|GRMZM5G883034_T01	3	17.852	1	21	21	41	CAUGUGCCCUUCUUCUCCAUC	GGUGGGCGAGGAGGGCACAUG	Cleavage	seq=cds; coord=8:22022395..22022652:-1; parent_gene=GRMZM5G883034	1
zma-miR164c-3p	gnl|ZmGDB|GRMZM2G012584_T02	2.5	19.237	1	20	1	20	CAUGUGCCCUUCUUCUCCAU	AUGGGGAAGAAGGGCAAGUG	Cleavage	seq=cds; coord=8:131678500..131682270:-1; parent_gene=GRMZM2G012584	1
zma-miR164c-3p	gnl|ZmGDB|GRMZM2G012584_T01	2.5	19.237	1	20	1	20	CAUGUGCCCUUCUUCUCCAU	AUGGGGAAGAAGGGCAAGUG	Cleavage	seq=cds; coord=8:131678500..131682399:-1; parent_gene=GRMZM2G012584	1
zma-miR164c-3p	gnl|ZmGDB|GRMZM5G826979_T01	2.5	18.454	1	20	1	20	CAUGUGCCCUUCUUCUCCAU	AUGGGGAAGAAGGGCAAGUG	Cleavage	seq=cds; coord=6:27902005..27905819:-1; parent_gene=GRMZM5G826979	1
zma-miR164c-3p	gnl|ZmGDB|GRMZM5G826979_T05	2.5	18.454	1	20	1	20	CAUGUGCCCUUCUUCUCCAU	AUGGGGAAGAAGGGCAAGUG	Cleavage	seq=cds; coord=6:27902005..27906109:-1; parent_gene=GRMZM5G826979	1
zma-miR164c-3p	gnl|ZmGDB|GRMZM5G826979_T04	2.5	18.454	1	20	1	20	CAUGUGCCCUUCUUCUCCAU	AUGGGGAAGAAGGGCAAGUG	Cleavage	seq=cds; coord=6:27902005..27906109:-1; parent_gene=GRMZM5G826979	1
zma-miR164c-3p	gnl|ZmGDB|GRMZM5G826979_T03	2.5	18.454	1	20	1	20	CAUGUGCCCUUCUUCUCCAU	AUGGGGAAGAAGGGCAAGUG	Cleavage	seq=cds; coord=6:27902005..27906109:-1; parent_gene=GRMZM5G826979	1
zma-miR164c-3p	gnl|ZmGDB|GRMZM2G700716_T01	3	19.433	1	20	779	798	CAUGUGCCCUUCUUCUCCAU	UCGGAGGAGGAGGGCACAUG	Cleavage	seq=cds; coord=8:153480244..153485672:-1; parent_gene=GRMZM2G700716	1
zma-miR164c-3p	gnl|ZmGDB|AC233936.1_FGT002	3	11.783	1	20	391	410	CAUGUGCCCUUCUUCUCCAU	GUGGAGAGGGAGGGCACAAG	Cleavage	seq=cds; coord=6:96152276..96152824:1; parent_gene=AC233936.1_FG002	1
zma-miR169a-5p	gnl|ZmGDB|GRMZM2G078124_T01	2	18.351	1	20	283	302	CAGCCAAGGAUGACUUGCCG	AGGCAAGUCAUCCUUGGCUA	Cleavage	seq=cds; coord=2:192698625..192701211:-1; parent_gene=GRMZM2G078124	1
zma-miR169a-5p	gnl|ZmGDB|GRMZM5G848857_T01	3	18.83	1	20	154	173	CAGCCAAGGAUGACUUGCCG	CAGCAAGUCAUCCUUUGUUG	Cleavage	seq=cds; coord=3:70673394..70675245:-1; parent_gene=GRMZM5G848857	1
zma-miR169a-3p	gnl|ZmGDB|GRMZM2G011140_T02	2.5	22.276	1	21	206	226	GGCAAGUUGUUCUUGGCUACA	UGCAGCCAAGGAUGACUUGCC	Cleavage	seq=cds; coord=2:11299777..11300748:1; parent_gene=GRMZM2G011140	1
zma-miR169a-3p	gnl|ZmGDB|GRMZM2G011140_T01	2.5	22.276	1	21	206	226	GGCAAGUUGUUCUUGGCUACA	UGCAGCCAAGGAUGACUUGCC	Cleavage	seq=cds; coord=2:11299777..11300750:1; parent_gene=GRMZM2G011140	1
zma-miR169a-3p	gnl|ZmGDB|GRMZM5G872861_T01	3	24.102	1	20	194	213	GGCAAGUUGUUCUUGGCUAC	UUAGCCAAGAACAGCUUCCC	Cleavage	seq=cds; coord=9:7308372..7309689:-1; parent_gene=GRMZM5G872861	1
zma-miR169a-3p	gnl|ZmGDB|AC192581.3_FGT002	3	20.643	1	21	378	398	GGCAAGUUGUUCUUGGCUACA	UGUGGCGAGCAACAACUUGCC	Cleavage	seq=cds; coord=7:91640396..91641025:-1; parent_gene=AC192581.3_FG002	1
zma-miR169b-5p	gnl|ZmGDB|GRMZM2G078124_T01	2	18.351	1	20	283	302	CAGCCAAGGAUGACUUGCCG	AGGCAAGUCAUCCUUGGCUA	Cleavage	seq=cds; coord=2:192698625..192701211:-1; parent_gene=GRMZM2G078124	1
zma-miR169b-5p	gnl|ZmGDB|GRMZM5G848857_T01	3	18.83	1	20	154	173	CAGCCAAGGAUGACUUGCCG	CAGCAAGUCAUCCUUUGUUG	Cleavage	seq=cds; coord=3:70673394..70675245:-1; parent_gene=GRMZM5G848857	1
zma-miR169b-3p	gnl|ZmGDB|GRMZM2G011140_T02	2.5	22.276	1	21	206	226	GGCAAGUUGUUCUUGGCUACA	UGCAGCCAAGGAUGACUUGCC	Cleavage	seq=cds; coord=2:11299777..11300748:1; parent_gene=GRMZM2G011140	1
zma-miR169b-3p	gnl|ZmGDB|GRMZM2G011140_T01	2.5	22.276	1	21	206	226	GGCAAGUUGUUCUUGGCUACA	UGCAGCCAAGGAUGACUUGCC	Cleavage	seq=cds; coord=2:11299777..11300750:1; parent_gene=GRMZM2G011140	1
zma-miR169b-3p	gnl|ZmGDB|GRMZM5G872861_T01	3	24.102	1	20	194	213	GGCAAGUUGUUCUUGGCUAC	UUAGCCAAGAACAGCUUCCC	Cleavage	seq=cds; coord=9:7308372..7309689:-1; parent_gene=GRMZM5G872861	1
zma-miR169b-3p	gnl|ZmGDB|AC192581.3_FGT002	3	20.643	1	21	378	398	GGCAAGUUGUUCUUGGCUACA	UGUGGCGAGCAACAACUUGCC	Cleavage	seq=cds; coord=7:91640396..91641025:-1; parent_gene=AC192581.3_FG002	1
zma-miR167a-5p	gnl|ZmGDB|GRMZM2G112769_T01	3	17.536	1	20	1007	1027	UGAAGCUGCCAGCA-UGAUCU	AGAUUAAUGCUGGCAGUUUCA	Cleavage	seq=cds; coord=1:103774646..103779085:1; parent_gene=GRMZM2G112769	1
zma-miR167a-5p	gnl|ZmGDB|GRMZM2G042623_T02	3	17.536	1	20	995	1015	UGAAGCUGCCAGCA-UGAUCU	AGAUUAAUGCUGGCAGUUUCA	Cleavage	seq=cds; coord=8:134370594..134377908:1; parent_gene=GRMZM2G042623	1
zma-miR167a-5p	gnl|ZmGDB|GRMZM2G042623_T01	3	17.536	1	20	1007	1027	UGAAGCUGCCAGCA-UGAUCU	AGAUUAAUGCUGGCAGUUUCA	Cleavage	seq=cds; coord=8:134370592..134377931:1; parent_gene=GRMZM2G042623	1
zma-miR167a-5p	gnl|ZmGDB|GRMZM2G363338_T01	3	17.457	1	20	835	854	UGAAGCUGCCAGCAUGAUCU	ACAUCAUGGUGGCGGCUUUA	Cleavage	seq=cds; coord=8:117799130..117801199:1; parent_gene=GRMZM2G363338	1
zma-miR167a-3p	gnl|ZmGDB|GRMZM2G158415_T01	3	17.331	1	21	74	94	GAUCAUGCAUGACAGCCUCAU	AUGAGGUUGUCAUGCAUAAUG	Cleavage	seq=cds; coord=4:39085601..39087931:-1; parent_gene=GRMZM2G158415	1
zma-miR167a-3p	gnl|ZmGDB|GRMZM2G003096_T01	3	20.202	1	22	397	418	GAUCAUGCAUGACAGCCUCAUU	GAUGAGGCGGUCAGUCAUGAUC	Translation	seq=cds; coord=3:14335790..14339102:1; parent_gene=GRMZM2G003096	1
zma-miR167a-3p	gnl|ZmGDB|GRMZM2G008622_T02	3	19.093	1	20	870	889	GAUCAUGCAUGACAGCCUCA	AGAGGCCGUCGUGUAUGAUC	Cleavage	seq=cds; coord=10:148233861..148237393:1; parent_gene=GRMZM2G008622	1
zma-miR167a-3p	gnl|ZmGDB|GRMZM2G008622_T01	3	19.093	1	20	870	889	GAUCAUGCAUGACAGCCUCA	AGAGGCCGUCGUGUAUGAUC	Cleavage	seq=cds; coord=10:148233861..148237411:1; parent_gene=GRMZM2G008622	1
zma-miR167b-5p	gnl|ZmGDB|GRMZM2G112769_T01	3	17.536	1	20	1007	1027	UGAAGCUGCCAGCA-UGAUCU	AGAUUAAUGCUGGCAGUUUCA	Cleavage	seq=cds; coord=1:103774646..103779085:1; parent_gene=GRMZM2G112769	1
zma-miR167b-5p	gnl|ZmGDB|GRMZM2G042623_T02	3	17.536	1	20	995	1015	UGAAGCUGCCAGCA-UGAUCU	AGAUUAAUGCUGGCAGUUUCA	Cleavage	seq=cds; coord=8:134370594..134377908:1; parent_gene=GRMZM2G042623	1
zma-miR167b-5p	gnl|ZmGDB|GRMZM2G042623_T01	3	17.536	1	20	1007	1027	UGAAGCUGCCAGCA-UGAUCU	AGAUUAAUGCUGGCAGUUUCA	Cleavage	seq=cds; coord=8:134370592..134377931:1; parent_gene=GRMZM2G042623	1
zma-miR167b-5p	gnl|ZmGDB|GRMZM2G363338_T01	3	17.457	1	20	835	854	UGAAGCUGCCAGCAUGAUCU	ACAUCAUGGUGGCGGCUUUA	Cleavage	seq=cds; coord=8:117799130..117801199:1; parent_gene=GRMZM2G363338	1
zma-miR167b-3p	gnl|ZmGDB|GRMZM2G338533_T01	3	24.35	1	23	753	775	GAUCAUGCUGUGACAGUUUCACU	AGAGAAGUUGUCACAUCAUGAUA	Cleavage	seq=cds; coord=8:99447030..99450918:1; parent_gene=GRMZM2G338533	1
zma-miR167d-5p	gnl|ZmGDB|GRMZM2G112769_T01	3	17.536	1	20	1007	1027	UGAAGCUGCCAGCA-UGAUCU	AGAUUAAUGCUGGCAGUUUCA	Cleavage	seq=cds; coord=1:103774646..103779085:1; parent_gene=GRMZM2G112769	1
zma-miR167d-5p	gnl|ZmGDB|GRMZM2G042623_T02	3	17.536	1	20	995	1015	UGAAGCUGCCAGCA-UGAUCU	AGAUUAAUGCUGGCAGUUUCA	Cleavage	seq=cds; coord=8:134370594..134377908:1; parent_gene=GRMZM2G042623	1
zma-miR167d-5p	gnl|ZmGDB|GRMZM2G042623_T01	3	17.536	1	20	1007	1027	UGAAGCUGCCAGCA-UGAUCU	AGAUUAAUGCUGGCAGUUUCA	Cleavage	seq=cds; coord=8:134370592..134377931:1; parent_gene=GRMZM2G042623	1
zma-miR167d-5p	gnl|ZmGDB|GRMZM2G363338_T01	3	17.457	1	20	835	854	UGAAGCUGCCAGCAUGAUCU	ACAUCAUGGUGGCGGCUUUA	Cleavage	seq=cds; coord=8:117799130..117801199:1; parent_gene=GRMZM2G363338	1
zma-miR167d-3p	gnl|ZmGDB|GRMZM2G322348_T01	2.5	19.46	1	20	17	36	GGUCAUGCUGCUGCAGCCUC	CAGGCUGCAUCAGCAUGAUC	Translation	seq=cds; coord=4:239702248..239706103:-1; parent_gene=GRMZM2G322348	1
zma-miR167c-5p	gnl|ZmGDB|GRMZM2G112769_T01	3	17.536	1	20	1007	1027	UGAAGCUGCCAGCA-UGAUCU	AGAUUAAUGCUGGCAGUUUCA	Cleavage	seq=cds; coord=1:103774646..103779085:1; parent_gene=GRMZM2G112769	1
zma-miR167c-5p	gnl|ZmGDB|GRMZM2G042623_T02	3	17.536	1	20	995	1015	UGAAGCUGCCAGCA-UGAUCU	AGAUUAAUGCUGGCAGUUUCA	Cleavage	seq=cds; coord=8:134370594..134377908:1; parent_gene=GRMZM2G042623	1
zma-miR167c-5p	gnl|ZmGDB|GRMZM2G042623_T01	3	17.536	1	20	1007	1027	UGAAGCUGCCAGCA-UGAUCU	AGAUUAAUGCUGGCAGUUUCA	Cleavage	seq=cds; coord=8:134370592..134377931:1; parent_gene=GRMZM2G042623	1
zma-miR167c-5p	gnl|ZmGDB|GRMZM2G363338_T01	3	17.457	1	20	835	854	UGAAGCUGCCAGCAUGAUCU	ACAUCAUGGUGGCGGCUUUA	Cleavage	seq=cds; coord=8:117799130..117801199:1; parent_gene=GRMZM2G363338	1
zma-miR167c-3p	gnl|ZmGDB|GRMZM2G171639_T06	3	21.966	1	21	309	329	GAUCAUGCUGUGGCAGCCUCA	UGAGGCUGUCAUAGUAUGCUC	Cleavage	seq=cds; coord=4:231964582..231966712:-1; parent_gene=GRMZM2G171639	1
zma-miR167c-3p	gnl|ZmGDB|GRMZM2G082836_T01	3	16.417	1	23	295	317	GAUCAUGCUGUGGCAGCCUCACU	AUUGACGCUGCCACAGCAUCGUC	Cleavage	seq=cds; coord=1:68107606..68110989:1; parent_gene=GRMZM2G082836	1
zma-miR160e	gnl|ZmGDB|GRMZM2G567718_T01	0	12.852	1	21	6	26	UGCCUGGCUCCCUGUAUGCCA	UGGCAUACAGGGAGCCAGGCA	Cleavage	seq=cds; coord=6:9144425..9144859:-1; parent_gene=GRMZM2G567718	1
zma-miR160e	gnl|ZmGDB|GRMZM2G159399_T01	0	21.942	1	20	1315	1334	UGCCUGGCUCCCUGUAUGCC	GGCAUACAGGGAGCCAGGCA	Cleavage	seq=cds; coord=5:27944757..27949513:-1; parent_gene=GRMZM2G159399	1
zma-miR160e	gnl|ZmGDB|AC207656.3_FGT002	0	24.063	1	20	1351	1370	UGCCUGGCUCCCUGUAUGCC	GGCAUACAGGGAGCCAGGCA	Cleavage	seq=cds; coord=5:49253260..49255662:1; parent_gene=AC207656.3_FG002	1
zma-miR160e	gnl|ZmGDB|AC207885.3_FGT009	1	24.092	1	20	484	503	UGCCUGGCUCCCUGUAUGCC	GGCAUACUGGGAGCCAGGCA	Cleavage	seq=cds; coord=2:168321269..168322176:-1; parent_gene=AC207885.3_FG009	1
zma-miR160e	gnl|ZmGDB|GRMZM2G081406_T01	1	22.146	1	20	1372	1391	UGCCUGGCUCCCUGUAUGCC	GCCAUACAGGGAGCCAGGCA	Cleavage	seq=cds; coord=4:143802561..143805351:1; parent_gene=GRMZM2G081406	1
zma-miR160e	gnl|ZmGDB|GRMZM2G481360_T01	1.5	19.367	1	20	1260	1279	UGCCUGGCUCCCUGUAUGCC	GGCAUCCGGGGAGCCAGGCA	Cleavage	seq=cds; coord=10:125546366..125549564:1; parent_gene=GRMZM2G481360	1
zma-miR160e	gnl|ZmGDB|GRMZM2G458180_T01	1.5	17.352	1	20	1422	1441	UGCCUGGCUCCCUGUAUGCC	GGCAUCCGGGGAGCCAGGCA	Cleavage	seq=cds; coord=3:109713094..109716519:-1; parent_gene=GRMZM2G458180	1
zma-miR160e	gnl|ZmGDB|GRMZM2G162809_T01	2.5	18.64	1	20	437	456	UGCCUGGCUCCCUGUAUGCC	AGCGUACAGUGAGCCAGGCA	Translation	seq=cds; coord=5:189764162..189765024:-1; parent_gene=GRMZM2G162809	1
zma-miR160e	gnl|ZmGDB|GRMZM2G077386_T01	2.5	18.446	1	20	131	150	UGCCUGGCUCCCUGUAUGCC	GGCGUACAUUGAGCCAGGCA	Translation	seq=cds; coord=7:134316140..134316558:1; parent_gene=GRMZM2G077386	1
zma-miR160e	gnl|ZmGDB|GRMZM5G861501_T01	3	22.084	1	20	502	521	UGCCUGGCUCCCUGUAUGCC	GGCAUGGAGGGAGCCAAGCA	Cleavage	seq=cds; coord=9:9361617..9363747:-1; parent_gene=GRMZM5G861501	1
zma-miR166a-5p	gnl|ZmGDB|GRMZM2G320366_T01	3	16.082	1	21	54	74	GGAAUGUUGUCUGGCUCGGGG	UUCUGAGUCGGACAACAUUUU	Cleavage	seq=cds; coord=7:57376467..57382423:1; parent_gene=GRMZM2G320366	1
zma-miR166a-5p	gnl|ZmGDB|GRMZM2G320366_T03	3	16.082	1	21	54	74	GGAAUGUUGUCUGGCUCGGGG	UUCUGAGUCGGACAACAUUUU	Cleavage	seq=cds; coord=7:57376467..57381926:1; parent_gene=GRMZM2G320366	1
zma-miR166a-5p	gnl|ZmGDB|GRMZM2G495837_T01	2.5	8.913	1	21	448	468	GGAAUGUUGUCUGGCUCGGGG	UUUCGAGACAGACAACAUUUC	Cleavage	seq=cds; coord=7:68313629..68317632:1; parent_gene=GRMZM2G495837	1
zma-miR166a-5p	gnl|ZmGDB|GRMZM2G137820_T03	2.5	9.639	1	21	334	354	GGAAUGUUGUCUGGCUCGGGG	UUUCGAGACAGACAACAUUUC	Cleavage	seq=cds; coord=6:128663003..128666516:1; parent_gene=GRMZM2G137820	1
zma-miR166a-5p	gnl|ZmGDB|GRMZM2G326851_T01	3	22.56	1	21	1010	1030	GGAAUGUUGUCUGGCUCGGGG	CUUCGAGCCAGGCCACGUUCC	Cleavage	seq=cds; coord=10:125298128..125300187:1; parent_gene=GRMZM2G326851	1
zma-miR166a-5p	gnl|ZmGDB|GRMZM2G134903_T01	3	17.264	1	21	930	950	GGAAUGUUGUCUGGCUCGGGG	UCUUGAGCCAGACGAUGUUUC	Cleavage	seq=cds; coord=5:34584610..34589024:-1; parent_gene=GRMZM2G134903	1
zma-miR166a-5p	gnl|ZmGDB|GRMZM2G137820_T02	2.5	9.639	1	21	334	354	GGAAUGUUGUCUGGCUCGGGG	UUUCGAGACAGACAACAUUUC	Cleavage	seq=cds; coord=6:128663003..128669641:1; parent_gene=GRMZM2G137820	1
zma-miR166a-5p	gnl|ZmGDB|GRMZM2G131793_T01	3	16.203	1	21	762	782	GGAAUGUUGUCUGGCUCGGGG	UUCUGAGUCGGACAACAUUUU	Cleavage	seq=cds; coord=2:147618366..147625222:1; parent_gene=GRMZM2G131793	1
zma-miR166a-5p	gnl|ZmGDB|GRMZM2G110198_T02	3	18.458	1	20	723	742	GGAAUGUUGUCUGGCUCGGG	ACCGGACCAGACAAUAUUCC	Cleavage	seq=cds; coord=1:115405246..115408968:1; parent_gene=GRMZM2G110198	1
zma-miR166a-3p	gnl|ZmGDB|GRMZM2G109987_T04	2	24.232	1	20	573	592	UCGGACCAGGCUUCAUUCCC	UGGGAUGAAGCCUGGUCCGG	Cleavage	seq=cds; coord=9:154645740..154650601:-1; parent_gene=GRMZM2G109987	1
zma-miR166a-3p	gnl|ZmGDB|GRMZM2G042250_T04	2	23.534	1	20	564	583	UCGGACCAGGCUUCAUUCCC	UGGGAUGAAGCCUGGUCCGG	Cleavage	seq=cds; coord=1:2793728..2798869:1; parent_gene=GRMZM2G042250	1
zma-miR166a-3p	gnl|ZmGDB|GRMZM2G469551_T02	2	19.005	1	20	543	562	UCGGACCAGGCUUCAUUCCC	UGGGAUGAAGCCUGGUCCGG	Cleavage	seq=cds; coord=1:230535887..230547084:-1; parent_gene=GRMZM2G469551	1
zma-miR166a-3p	gnl|ZmGDB|GRMZM2G003509_T02	2	21.178	1	20	45	64	UCGGACCAGGCUUCAUUCCC	UGGGAUGAAGCCUGGUCCGG	Cleavage	seq=cds; coord=1:173233523..173239064:-1; parent_gene=GRMZM2G003509	1
zma-miR166a-3p	gnl|ZmGDB|GRMZM2G109987_T01	2	24.232	1	20	573	592	UCGGACCAGGCUUCAUUCCC	UGGGAUGAAGCCUGGUCCGG	Cleavage	seq=cds; coord=9:154642336..154650601:-1; parent_gene=GRMZM2G109987	1
zma-miR166a-3p	gnl|ZmGDB|GRMZM2G109987_T03	2	24.232	1	20	573	592	UCGGACCAGGCUUCAUUCCC	UGGGAUGAAGCCUGGUCCGG	Cleavage	seq=cds; coord=9:154642336..154650601:-1; parent_gene=GRMZM2G109987	1
zma-miR166a-3p	gnl|ZmGDB|GRMZM2G469551_T01	2	19.005	1	20	543	562	UCGGACCAGGCUUCAUUCCC	UGGGAUGAAGCCUGGUCCGG	Cleavage	seq=cds; coord=1:230535106..230547084:-1; parent_gene=GRMZM2G469551	1
zma-miR166a-3p	gnl|ZmGDB|GRMZM2G042250_T02	2	23.534	1	20	564	583	UCGGACCAGGCUUCAUUCCC	UGGGAUGAAGCCUGGUCCGG	Cleavage	seq=cds; coord=1:2793950..2800638:1; parent_gene=GRMZM2G042250	1
zma-miR166a-3p	gnl|ZmGDB|GRMZM2G042250_T01	2	23.534	1	20	564	583	UCGGACCAGGCUUCAUUCCC	UGGGAUGAAGCCUGGUCCGG	Cleavage	seq=cds; coord=1:2793728..2800641:1; parent_gene=GRMZM2G042250	1
zma-miR166a-3p	gnl|ZmGDB|GRMZM2G109987_T02	2	24.232	1	20	573	592	UCGGACCAGGCUUCAUUCCC	UGGGAUGAAGCCUGGUCCGG	Cleavage	seq=cds; coord=9:154642336..154650601:-1; parent_gene=GRMZM2G109987	1
zma-miR166a-3p	gnl|ZmGDB|GRMZM2G109987_T05	2	24.232	1	20	573	592	UCGGACCAGGCUUCAUUCCC	UGGGAUGAAGCCUGGUCCGG	Cleavage	seq=cds; coord=9:154642733..154649986:-1; parent_gene=GRMZM2G109987	1
zma-miR166a-3p	gnl|ZmGDB|GRMZM2G003509_T01	2	21.036	1	20	588	607	UCGGACCAGGCUUCAUUCCC	UGGGAUGAAGCCUGGUCCGG	Cleavage	seq=cds; coord=1:173233037..173239064:-1; parent_gene=GRMZM2G003509	1
zma-miR166a-3p	gnl|ZmGDB|AC187157.4_FGT005	2	23.173	1	20	564	583	UCGGACCAGGCUUCAUUCCC	CGGGAUGAAGCCUGGUCCGG	Cleavage	seq=cds; coord=8:22640866..22645283:-1; parent_gene=AC187157.4_FG005	1
zma-miR166a-3p	gnl|ZmGDB|GRMZM2G042250_T03	2	23.534	1	20	564	583	UCGGACCAGGCUUCAUUCCC	UGGGAUGAAGCCUGGUCCGG	Cleavage	seq=cds; coord=1:2793728..2800614:1; parent_gene=GRMZM2G042250	1
zma-miR166a-3p	gnl|ZmGDB|GRMZM2G178102_T01	2	20.931	1	20	882	901	UCGGACCAGGCUUCAUUCCC	UGGGAUGAAGCCUGGUCCGG	Cleavage	seq=cds; coord=3:123263423..123270240:-1; parent_gene=GRMZM2G178102	1
zma-miR166a-3p	gnl|ZmGDB|GRMZM2G006062_T01	2.5	22.975	1	20	108	127	UCGGACCAGGCUUCAUUCCC	UGGGAUGAAGCUUGGUCCGG	Cleavage	seq=cds; coord=4:169430032..169431340:1; parent_gene=GRMZM2G006062	1
zma-miR166a-3p	gnl|ZmGDB|AC208827.3_FGT002	2	16.209	1	20	268	287	UCGGACCAGGCUUCAUUCCC	AGGAAUGCAGCCUGGUCCGA	Cleavage	seq=cds; coord=10:47167600..47168316:-1; parent_gene=AC208827.3_FG002	1
zma-miR166a-3p	gnl|ZmGDB|GRMZM2G552083_T01	2.5	19.564	1	20	546	565	UCGGACCAGGCUUCAUUCCC	UGGGAUGGAGCCUGGUCCGG	Cleavage	seq=cds; coord=10:142904755..142908069:1; parent_gene=GRMZM2G552083	1
zma-miR166a-3p	gnl|ZmGDB|GRMZM2G336718_T01	2.5	19.552	1	20	45	64	UCGGACCAGGCUUCAUUCCC	UGGGAUGGAGCCUGGUCCGG	Cleavage	seq=cds; coord=10:102279782..102283839:1; parent_gene=GRMZM2G336718	1
zma-miR166a-3p	gnl|ZmGDB|GRMZM2G123644_T01	2.5	19.564	1	20	546	565	UCGGACCAGGCUUCAUUCCC	UGGGAUGGAGCCUGGUCCGG	Cleavage	seq=cds; coord=10:71608833..71613973:1; parent_gene=GRMZM2G123644	1
zma-miR166a-3p	gnl|ZmGDB|GRMZM2G038198_T01	3	17.689	1	20	486	505	UCGGACCAGGCUUCAUUCCC	UGAGAUGAAGCCUGGUCCGG	Cleavage	seq=cds; coord=10:39623082..39627688:-1; parent_gene=GRMZM2G038198	1
zma-miR162-5p	gnl|ZmGDB|GRMZM2G000889_T01	0	14.868	1	21	284	304	GGGCGCAGUGGUUUAUCGAUC	GAUCGAUAAACCACUGCGCCC	Cleavage	seq=cds; coord=5:182039249..182040909:1; parent_gene=GRMZM2G000889	1
zma-miR162-5p	gnl|ZmGDB|GRMZM2G020912_T01	3	14.107	1	20	1749	1768	GGGCGCAGUGGUUUAUCGAU	AUUGAAAAACUACUGUGCUC	Cleavage	seq=cds; coord=6:81965055..81971532:1; parent_gene=GRMZM2G020912	1
zma-miR162-5p	gnl|ZmGDB|GRMZM2G020912_T03	3	14.107	1	20	1662	1681	GGGCGCAGUGGUUUAUCGAU	AUUGAAAAACUACUGUGCUC	Cleavage	seq=cds; coord=6:81965001..81971331:1; parent_gene=GRMZM2G020912	1
zma-miR162-5p	gnl|ZmGDB|GRMZM2G020912_T02	3	14.107	1	20	1749	1768	GGGCGCAGUGGUUUAUCGAU	AUUGAAAAACUACUGUGCUC	Cleavage	seq=cds; coord=6:81965055..81971532:1; parent_gene=GRMZM2G020912	1
zma-miR162-5p	gnl|ZmGDB|GRMZM2G422464_T02	3	15.452	1	20	4855	4874	GGGCGCAGUGGUUUAUCGAU	AUCGAGGAACCACUGAGCCC	Cleavage	seq=cds; coord=4:218137643..218155614:-1; parent_gene=GRMZM2G422464	1
zma-miR162-3p	gnl|ZmGDB|GRMZM2G000889_T01	0	19.174	1	20	178	197	UCGAUAAACCUCUGCAUCCA	UGGAUGCAGAGGUUUAUCGA	Cleavage	seq=cds; coord=5:182039249..182040909:1; parent_gene=GRMZM2G000889	1
zma-miR162-3p	gnl|ZmGDB|GRMZM2G040762_T01	2.5	24.192	1	20	1253	1273	UCGAU-AAACCUCUGCAUCCA	UGGAUGCAGAGGUUUUAUCGA	Cleavage	seq=cds; coord=1:4607185..4614592:-1; parent_gene=GRMZM2G040762	1
zma-miR166h-5p	gnl|ZmGDB|GRMZM2G420865_T02	2.5	24.272	1	20	474	493	GGAAUGACGUCCGGUCCGAA	UUCGGAUCGGGCAUCAUUUC	Cleavage	seq=cds; coord=2:193040343..193063905:1; parent_gene=GRMZM2G420865	1
zma-miR166h-5p	gnl|ZmGDB|GRMZM2G420865_T01	2.5	24.272	1	20	522	541	GGAAUGACGUCCGGUCCGAA	UUCGGAUCGGGCAUCAUUUC	Cleavage	seq=cds; coord=2:193040339..193063547:1; parent_gene=GRMZM2G420865	1
zma-miR166h-3p	gnl|ZmGDB|GRMZM2G109987_T04	2	24.232	1	20	573	592	UCGGACCAGGCUUCAUUCCC	UGGGAUGAAGCCUGGUCCGG	Cleavage	seq=cds; coord=9:154645740..154650601:-1; parent_gene=GRMZM2G109987	1
zma-miR166h-3p	gnl|ZmGDB|GRMZM2G042250_T04	2	23.534	1	20	564	583	UCGGACCAGGCUUCAUUCCC	UGGGAUGAAGCCUGGUCCGG	Cleavage	seq=cds; coord=1:2793728..2798869:1; parent_gene=GRMZM2G042250	1
zma-miR166h-3p	gnl|ZmGDB|GRMZM2G469551_T02	2	19.005	1	20	543	562	UCGGACCAGGCUUCAUUCCC	UGGGAUGAAGCCUGGUCCGG	Cleavage	seq=cds; coord=1:230535887..230547084:-1; parent_gene=GRMZM2G469551	1
zma-miR166h-3p	gnl|ZmGDB|GRMZM2G003509_T02	2	21.178	1	20	45	64	UCGGACCAGGCUUCAUUCCC	UGGGAUGAAGCCUGGUCCGG	Cleavage	seq=cds; coord=1:173233523..173239064:-1; parent_gene=GRMZM2G003509	1
zma-miR166h-3p	gnl|ZmGDB|GRMZM2G109987_T01	2	24.232	1	20	573	592	UCGGACCAGGCUUCAUUCCC	UGGGAUGAAGCCUGGUCCGG	Cleavage	seq=cds; coord=9:154642336..154650601:-1; parent_gene=GRMZM2G109987	1
zma-miR166h-3p	gnl|ZmGDB|GRMZM2G109987_T03	2	24.232	1	20	573	592	UCGGACCAGGCUUCAUUCCC	UGGGAUGAAGCCUGGUCCGG	Cleavage	seq=cds; coord=9:154642336..154650601:-1; parent_gene=GRMZM2G109987	1
zma-miR166h-3p	gnl|ZmGDB|GRMZM2G469551_T01	2	19.005	1	20	543	562	UCGGACCAGGCUUCAUUCCC	UGGGAUGAAGCCUGGUCCGG	Cleavage	seq=cds; coord=1:230535106..230547084:-1; parent_gene=GRMZM2G469551	1
zma-miR166h-3p	gnl|ZmGDB|GRMZM2G042250_T01	2	23.534	1	20	564	583	UCGGACCAGGCUUCAUUCCC	UGGGAUGAAGCCUGGUCCGG	Cleavage	seq=cds; coord=1:2793728..2800641:1; parent_gene=GRMZM2G042250	1
zma-miR166h-3p	gnl|ZmGDB|GRMZM2G042250_T02	2	23.534	1	20	564	583	UCGGACCAGGCUUCAUUCCC	UGGGAUGAAGCCUGGUCCGG	Cleavage	seq=cds; coord=1:2793950..2800638:1; parent_gene=GRMZM2G042250	1
zma-miR166h-3p	gnl|ZmGDB|GRMZM2G109987_T05	2	24.232	1	20	573	592	UCGGACCAGGCUUCAUUCCC	UGGGAUGAAGCCUGGUCCGG	Cleavage	seq=cds; coord=9:154642733..154649986:-1; parent_gene=GRMZM2G109987	1
zma-miR166h-3p	gnl|ZmGDB|GRMZM2G109987_T02	2	24.232	1	20	573	592	UCGGACCAGGCUUCAUUCCC	UGGGAUGAAGCCUGGUCCGG	Cleavage	seq=cds; coord=9:154642336..154650601:-1; parent_gene=GRMZM2G109987	1
zma-miR166h-3p	gnl|ZmGDB|GRMZM2G003509_T01	2	21.036	1	20	588	607	UCGGACCAGGCUUCAUUCCC	UGGGAUGAAGCCUGGUCCGG	Cleavage	seq=cds; coord=1:173233037..173239064:-1; parent_gene=GRMZM2G003509	1
zma-miR166h-3p	gnl|ZmGDB|AC187157.4_FGT005	2	23.173	1	20	564	583	UCGGACCAGGCUUCAUUCCC	CGGGAUGAAGCCUGGUCCGG	Cleavage	seq=cds; coord=8:22640866..22645283:-1; parent_gene=AC187157.4_FG005	1
zma-miR166h-3p	gnl|ZmGDB|GRMZM2G042250_T03	2	23.534	1	20	564	583	UCGGACCAGGCUUCAUUCCC	UGGGAUGAAGCCUGGUCCGG	Cleavage	seq=cds; coord=1:2793728..2800614:1; parent_gene=GRMZM2G042250	1
zma-miR166h-3p	gnl|ZmGDB|GRMZM2G178102_T01	2	20.931	1	20	882	901	UCGGACCAGGCUUCAUUCCC	UGGGAUGAAGCCUGGUCCGG	Cleavage	seq=cds; coord=3:123263423..123270240:-1; parent_gene=GRMZM2G178102	1
zma-miR166h-3p	gnl|ZmGDB|GRMZM2G006062_T01	2.5	22.975	1	20	108	127	UCGGACCAGGCUUCAUUCCC	UGGGAUGAAGCUUGGUCCGG	Cleavage	seq=cds; coord=4:169430032..169431340:1; parent_gene=GRMZM2G006062	1
zma-miR166h-3p	gnl|ZmGDB|AC208827.3_FGT002	2	16.209	1	20	268	287	UCGGACCAGGCUUCAUUCCC	AGGAAUGCAGCCUGGUCCGA	Cleavage	seq=cds; coord=10:47167600..47168316:-1; parent_gene=AC208827.3_FG002	1
zma-miR166h-3p	gnl|ZmGDB|GRMZM2G552083_T01	2.5	19.564	1	20	546	565	UCGGACCAGGCUUCAUUCCC	UGGGAUGGAGCCUGGUCCGG	Cleavage	seq=cds; coord=10:142904755..142908069:1; parent_gene=GRMZM2G552083	1
zma-miR166h-3p	gnl|ZmGDB|GRMZM2G336718_T01	2.5	19.552	1	20	45	64	UCGGACCAGGCUUCAUUCCC	UGGGAUGGAGCCUGGUCCGG	Cleavage	seq=cds; coord=10:102279782..102283839:1; parent_gene=GRMZM2G336718	1
zma-miR166h-3p	gnl|ZmGDB|GRMZM2G123644_T01	2.5	19.564	1	20	546	565	UCGGACCAGGCUUCAUUCCC	UGGGAUGGAGCCUGGUCCGG	Cleavage	seq=cds; coord=10:71608833..71613973:1; parent_gene=GRMZM2G123644	1
zma-miR166h-3p	gnl|ZmGDB|GRMZM2G038198_T01	3	17.689	1	20	486	505	UCGGACCAGGCUUCAUUCCC	UGAGAUGAAGCCUGGUCCGG	Cleavage	seq=cds; coord=10:39623082..39627688:-1; parent_gene=GRMZM2G038198	1
zma-miR166h-3p	gnl|ZmGDB|GRMZM5G897556_T01	2.5	23.965	1	20	254	273	UCGGACCAGGCUUCAUUCCC	GGGGAACAAGCCUGGUCCGA	Cleavage	seq=cds; coord=6:7506596..7507790:-1; parent_gene=GRMZM5G897556	1
zma-miR166h-3p	gnl|ZmGDB|GRMZM2G499154_T01	2.5	19.184	1	20	1129	1148	UCGGACCAGGCUUCAUUCCC	GGGGAACAAGCCUGGUCCGA	Cleavage	seq=cds; coord=2:179016240..179019876:1; parent_gene=GRMZM2G499154	1
zma-miR166e	gnl|ZmGDB|GRMZM2G109987_T04	2	24.232	1	20	573	592	UCGGACCAGGCUUCAUUCCC	UGGGAUGAAGCCUGGUCCGG	Cleavage	seq=cds; coord=9:154645740..154650601:-1; parent_gene=GRMZM2G109987	1
zma-miR166e	gnl|ZmGDB|GRMZM2G042250_T04	2	23.534	1	20	564	583	UCGGACCAGGCUUCAUUCCC	UGGGAUGAAGCCUGGUCCGG	Cleavage	seq=cds; coord=1:2793728..2798869:1; parent_gene=GRMZM2G042250	1
zma-miR166e	gnl|ZmGDB|GRMZM2G469551_T02	2	19.005	1	20	543	562	UCGGACCAGGCUUCAUUCCC	UGGGAUGAAGCCUGGUCCGG	Cleavage	seq=cds; coord=1:230535887..230547084:-1; parent_gene=GRMZM2G469551	1
zma-miR166e	gnl|ZmGDB|GRMZM2G003509_T02	2	21.178	1	20	45	64	UCGGACCAGGCUUCAUUCCC	UGGGAUGAAGCCUGGUCCGG	Cleavage	seq=cds; coord=1:173233523..173239064:-1; parent_gene=GRMZM2G003509	1
zma-miR166e	gnl|ZmGDB|GRMZM2G109987_T01	2	24.232	1	20	573	592	UCGGACCAGGCUUCAUUCCC	UGGGAUGAAGCCUGGUCCGG	Cleavage	seq=cds; coord=9:154642336..154650601:-1; parent_gene=GRMZM2G109987	1
zma-miR166e	gnl|ZmGDB|GRMZM2G109987_T03	2	24.232	1	20	573	592	UCGGACCAGGCUUCAUUCCC	UGGGAUGAAGCCUGGUCCGG	Cleavage	seq=cds; coord=9:154642336..154650601:-1; parent_gene=GRMZM2G109987	1
zma-miR166e	gnl|ZmGDB|GRMZM2G469551_T01	2	19.005	1	20	543	562	UCGGACCAGGCUUCAUUCCC	UGGGAUGAAGCCUGGUCCGG	Cleavage	seq=cds; coord=1:230535106..230547084:-1; parent_gene=GRMZM2G469551	1
zma-miR166e	gnl|ZmGDB|GRMZM2G042250_T01	2	23.534	1	20	564	583	UCGGACCAGGCUUCAUUCCC	UGGGAUGAAGCCUGGUCCGG	Cleavage	seq=cds; coord=1:2793728..2800641:1; parent_gene=GRMZM2G042250	1
zma-miR166e	gnl|ZmGDB|GRMZM2G042250_T02	2	23.534	1	20	564	583	UCGGACCAGGCUUCAUUCCC	UGGGAUGAAGCCUGGUCCGG	Cleavage	seq=cds; coord=1:2793950..2800638:1; parent_gene=GRMZM2G042250	1
zma-miR166e	gnl|ZmGDB|GRMZM2G109987_T05	2	24.232	1	20	573	592	UCGGACCAGGCUUCAUUCCC	UGGGAUGAAGCCUGGUCCGG	Cleavage	seq=cds; coord=9:154642733..154649986:-1; parent_gene=GRMZM2G109987	1
zma-miR166e	gnl|ZmGDB|GRMZM2G109987_T02	2	24.232	1	20	573	592	UCGGACCAGGCUUCAUUCCC	UGGGAUGAAGCCUGGUCCGG	Cleavage	seq=cds; coord=9:154642336..154650601:-1; parent_gene=GRMZM2G109987	1
zma-miR166e	gnl|ZmGDB|GRMZM2G003509_T01	2	21.036	1	20	588	607	UCGGACCAGGCUUCAUUCCC	UGGGAUGAAGCCUGGUCCGG	Cleavage	seq=cds; coord=1:173233037..173239064:-1; parent_gene=GRMZM2G003509	1
zma-miR166e	gnl|ZmGDB|AC187157.4_FGT005	2	23.173	1	20	564	583	UCGGACCAGGCUUCAUUCCC	CGGGAUGAAGCCUGGUCCGG	Cleavage	seq=cds; coord=8:22640866..22645283:-1; parent_gene=AC187157.4_FG005	1
zma-miR166e	gnl|ZmGDB|GRMZM2G042250_T03	2	23.534	1	20	564	583	UCGGACCAGGCUUCAUUCCC	UGGGAUGAAGCCUGGUCCGG	Cleavage	seq=cds; coord=1:2793728..2800614:1; parent_gene=GRMZM2G042250	1
zma-miR166e	gnl|ZmGDB|GRMZM2G178102_T01	2	20.931	1	20	882	901	UCGGACCAGGCUUCAUUCCC	UGGGAUGAAGCCUGGUCCGG	Cleavage	seq=cds; coord=3:123263423..123270240:-1; parent_gene=GRMZM2G178102	1
zma-miR166e	gnl|ZmGDB|GRMZM2G006062_T01	2.5	22.975	1	20	108	127	UCGGACCAGGCUUCAUUCCC	UGGGAUGAAGCUUGGUCCGG	Cleavage	seq=cds; coord=4:169430032..169431340:1; parent_gene=GRMZM2G006062	1
zma-miR166e	gnl|ZmGDB|AC208827.3_FGT002	2	16.209	1	20	268	287	UCGGACCAGGCUUCAUUCCC	AGGAAUGCAGCCUGGUCCGA	Cleavage	seq=cds; coord=10:47167600..47168316:-1; parent_gene=AC208827.3_FG002	1
zma-miR166e	gnl|ZmGDB|GRMZM2G552083_T01	2.5	19.564	1	20	546	565	UCGGACCAGGCUUCAUUCCC	UGGGAUGGAGCCUGGUCCGG	Cleavage	seq=cds; coord=10:142904755..142908069:1; parent_gene=GRMZM2G552083	1
zma-miR166e	gnl|ZmGDB|GRMZM2G336718_T01	2.5	19.552	1	20	45	64	UCGGACCAGGCUUCAUUCCC	UGGGAUGGAGCCUGGUCCGG	Cleavage	seq=cds; coord=10:102279782..102283839:1; parent_gene=GRMZM2G336718	1
zma-miR166e	gnl|ZmGDB|GRMZM2G123644_T01	2.5	19.564	1	20	546	565	UCGGACCAGGCUUCAUUCCC	UGGGAUGGAGCCUGGUCCGG	Cleavage	seq=cds; coord=10:71608833..71613973:1; parent_gene=GRMZM2G123644	1
zma-miR166e	gnl|ZmGDB|GRMZM2G038198_T01	3	17.689	1	20	486	505	UCGGACCAGGCUUCAUUCCC	UGAGAUGAAGCCUGGUCCGG	Cleavage	seq=cds; coord=10:39623082..39627688:-1; parent_gene=GRMZM2G038198	1
zma-miR166e	gnl|ZmGDB|GRMZM5G897556_T01	2.5	23.965	1	20	254	273	UCGGACCAGGCUUCAUUCCC	GGGGAACAAGCCUGGUCCGA	Cleavage	seq=cds; coord=6:7506596..7507790:-1; parent_gene=GRMZM5G897556	1
zma-miR166e	gnl|ZmGDB|GRMZM2G499154_T01	2.5	19.184	1	20	1129	1148	UCGGACCAGGCUUCAUUCCC	GGGGAACAAGCCUGGUCCGA	Cleavage	seq=cds; coord=2:179016240..179019876:1; parent_gene=GRMZM2G499154	1
zma-miR166i-5p	gnl|ZmGDB|GRMZM2G134903_T01	3	17.264	1	21	930	950	GGAAUGUCGUCUGGCGCGAGA	UCUUGAGCCAGACGAUGUUUC	Cleavage	seq=cds; coord=5:34584610..34589024:-1; parent_gene=GRMZM2G134903	1
zma-miR166i-5p	gnl|ZmGDB|GRMZM2G305439_T01	3	24.808	1	20	753	772	GGAAUGUCGUCUGGCGCGAG	CUCGCACCGGAUGGCGUUCC	Cleavage	seq=cds; coord=3:213593371..213594644:1; parent_gene=GRMZM2G305439	1
zma-miR166i-3p	gnl|ZmGDB|GRMZM2G109987_T04	2	24.232	1	20	573	592	UCGGACCAGGCUUCAUUCCC	UGGGAUGAAGCCUGGUCCGG	Cleavage	seq=cds; coord=9:154645740..154650601:-1; parent_gene=GRMZM2G109987	1
zma-miR166i-3p	gnl|ZmGDB|GRMZM2G042250_T04	2	23.534	1	20	564	583	UCGGACCAGGCUUCAUUCCC	UGGGAUGAAGCCUGGUCCGG	Cleavage	seq=cds; coord=1:2793728..2798869:1; parent_gene=GRMZM2G042250	1
zma-miR166i-3p	gnl|ZmGDB|GRMZM2G469551_T02	2	19.005	1	20	543	562	UCGGACCAGGCUUCAUUCCC	UGGGAUGAAGCCUGGUCCGG	Cleavage	seq=cds; coord=1:230535887..230547084:-1; parent_gene=GRMZM2G469551	1
zma-miR166i-3p	gnl|ZmGDB|GRMZM2G003509_T02	2	21.178	1	20	45	64	UCGGACCAGGCUUCAUUCCC	UGGGAUGAAGCCUGGUCCGG	Cleavage	seq=cds; coord=1:173233523..173239064:-1; parent_gene=GRMZM2G003509	1
zma-miR166i-3p	gnl|ZmGDB|GRMZM2G109987_T01	2	24.232	1	20	573	592	UCGGACCAGGCUUCAUUCCC	UGGGAUGAAGCCUGGUCCGG	Cleavage	seq=cds; coord=9:154642336..154650601:-1; parent_gene=GRMZM2G109987	1
zma-miR166i-3p	gnl|ZmGDB|GRMZM2G109987_T03	2	24.232	1	20	573	592	UCGGACCAGGCUUCAUUCCC	UGGGAUGAAGCCUGGUCCGG	Cleavage	seq=cds; coord=9:154642336..154650601:-1; parent_gene=GRMZM2G109987	1
zma-miR166i-3p	gnl|ZmGDB|GRMZM2G469551_T01	2	19.005	1	20	543	562	UCGGACCAGGCUUCAUUCCC	UGGGAUGAAGCCUGGUCCGG	Cleavage	seq=cds; coord=1:230535106..230547084:-1; parent_gene=GRMZM2G469551	1
zma-miR166i-3p	gnl|ZmGDB|GRMZM2G042250_T01	2	23.534	1	20	564	583	UCGGACCAGGCUUCAUUCCC	UGGGAUGAAGCCUGGUCCGG	Cleavage	seq=cds; coord=1:2793728..2800641:1; parent_gene=GRMZM2G042250	1
zma-miR166i-3p	gnl|ZmGDB|GRMZM2G042250_T02	2	23.534	1	20	564	583	UCGGACCAGGCUUCAUUCCC	UGGGAUGAAGCCUGGUCCGG	Cleavage	seq=cds; coord=1:2793950..2800638:1; parent_gene=GRMZM2G042250	1
zma-miR166i-3p	gnl|ZmGDB|GRMZM2G109987_T05	2	24.232	1	20	573	592	UCGGACCAGGCUUCAUUCCC	UGGGAUGAAGCCUGGUCCGG	Cleavage	seq=cds; coord=9:154642733..154649986:-1; parent_gene=GRMZM2G109987	1
zma-miR166i-3p	gnl|ZmGDB|GRMZM2G109987_T02	2	24.232	1	20	573	592	UCGGACCAGGCUUCAUUCCC	UGGGAUGAAGCCUGGUCCGG	Cleavage	seq=cds; coord=9:154642336..154650601:-1; parent_gene=GRMZM2G109987	1
zma-miR166i-3p	gnl|ZmGDB|GRMZM2G003509_T01	2	21.036	1	20	588	607	UCGGACCAGGCUUCAUUCCC	UGGGAUGAAGCCUGGUCCGG	Cleavage	seq=cds; coord=1:173233037..173239064:-1; parent_gene=GRMZM2G003509	1
zma-miR166i-3p	gnl|ZmGDB|AC187157.4_FGT005	2	23.173	1	20	564	583	UCGGACCAGGCUUCAUUCCC	CGGGAUGAAGCCUGGUCCGG	Cleavage	seq=cds; coord=8:22640866..22645283:-1; parent_gene=AC187157.4_FG005	1
zma-miR166i-3p	gnl|ZmGDB|GRMZM2G042250_T03	2	23.534	1	20	564	583	UCGGACCAGGCUUCAUUCCC	UGGGAUGAAGCCUGGUCCGG	Cleavage	seq=cds; coord=1:2793728..2800614:1; parent_gene=GRMZM2G042250	1
zma-miR166i-3p	gnl|ZmGDB|GRMZM2G178102_T01	2	20.931	1	20	882	901	UCGGACCAGGCUUCAUUCCC	UGGGAUGAAGCCUGGUCCGG	Cleavage	seq=cds; coord=3:123263423..123270240:-1; parent_gene=GRMZM2G178102	1
zma-miR166i-3p	gnl|ZmGDB|GRMZM2G006062_T01	2.5	22.975	1	20	108	127	UCGGACCAGGCUUCAUUCCC	UGGGAUGAAGCUUGGUCCGG	Cleavage	seq=cds; coord=4:169430032..169431340:1; parent_gene=GRMZM2G006062	1
zma-miR166i-3p	gnl|ZmGDB|AC208827.3_FGT002	2	16.209	1	20	268	287	UCGGACCAGGCUUCAUUCCC	AGGAAUGCAGCCUGGUCCGA	Cleavage	seq=cds; coord=10:47167600..47168316:-1; parent_gene=AC208827.3_FG002	1
zma-miR166i-3p	gnl|ZmGDB|GRMZM2G552083_T01	2.5	19.564	1	20	546	565	UCGGACCAGGCUUCAUUCCC	UGGGAUGGAGCCUGGUCCGG	Cleavage	seq=cds; coord=10:142904755..142908069:1; parent_gene=GRMZM2G552083	1
zma-miR166i-3p	gnl|ZmGDB|GRMZM2G336718_T01	2.5	19.552	1	20	45	64	UCGGACCAGGCUUCAUUCCC	UGGGAUGGAGCCUGGUCCGG	Cleavage	seq=cds; coord=10:102279782..102283839:1; parent_gene=GRMZM2G336718	1
zma-miR166i-3p	gnl|ZmGDB|GRMZM2G123644_T01	2.5	19.564	1	20	546	565	UCGGACCAGGCUUCAUUCCC	UGGGAUGGAGCCUGGUCCGG	Cleavage	seq=cds; coord=10:71608833..71613973:1; parent_gene=GRMZM2G123644	1
zma-miR166i-3p	gnl|ZmGDB|GRMZM2G038198_T01	3	17.689	1	20	486	505	UCGGACCAGGCUUCAUUCCC	UGAGAUGAAGCCUGGUCCGG	Cleavage	seq=cds; coord=10:39623082..39627688:-1; parent_gene=GRMZM2G038198	1
zma-miR166i-3p	gnl|ZmGDB|GRMZM5G897556_T01	2.5	23.965	1	20	254	273	UCGGACCAGGCUUCAUUCCC	GGGGAACAAGCCUGGUCCGA	Cleavage	seq=cds; coord=6:7506596..7507790:-1; parent_gene=GRMZM5G897556	1
zma-miR166i-3p	gnl|ZmGDB|GRMZM2G499154_T01	2.5	19.184	1	20	1129	1148	UCGGACCAGGCUUCAUUCCC	GGGGAACAAGCCUGGUCCGA	Cleavage	seq=cds; coord=2:179016240..179019876:1; parent_gene=GRMZM2G499154	1
zma-miR166f	gnl|ZmGDB|GRMZM2G109987_T04	2	24.232	1	20	573	592	UCGGACCAGGCUUCAUUCCC	UGGGAUGAAGCCUGGUCCGG	Cleavage	seq=cds; coord=9:154645740..154650601:-1; parent_gene=GRMZM2G109987	1
zma-miR166f	gnl|ZmGDB|GRMZM2G042250_T04	2	23.534	1	20	564	583	UCGGACCAGGCUUCAUUCCC	UGGGAUGAAGCCUGGUCCGG	Cleavage	seq=cds; coord=1:2793728..2798869:1; parent_gene=GRMZM2G042250	1
zma-miR166f	gnl|ZmGDB|GRMZM2G469551_T02	2	19.005	1	20	543	562	UCGGACCAGGCUUCAUUCCC	UGGGAUGAAGCCUGGUCCGG	Cleavage	seq=cds; coord=1:230535887..230547084:-1; parent_gene=GRMZM2G469551	1
zma-miR166f	gnl|ZmGDB|GRMZM2G003509_T02	2	21.178	1	20	45	64	UCGGACCAGGCUUCAUUCCC	UGGGAUGAAGCCUGGUCCGG	Cleavage	seq=cds; coord=1:173233523..173239064:-1; parent_gene=GRMZM2G003509	1
zma-miR166f	gnl|ZmGDB|GRMZM2G109987_T01	2	24.232	1	20	573	592	UCGGACCAGGCUUCAUUCCC	UGGGAUGAAGCCUGGUCCGG	Cleavage	seq=cds; coord=9:154642336..154650601:-1; parent_gene=GRMZM2G109987	1
zma-miR166f	gnl|ZmGDB|GRMZM2G109987_T03	2	24.232	1	20	573	592	UCGGACCAGGCUUCAUUCCC	UGGGAUGAAGCCUGGUCCGG	Cleavage	seq=cds; coord=9:154642336..154650601:-1; parent_gene=GRMZM2G109987	1
zma-miR166f	gnl|ZmGDB|GRMZM2G469551_T01	2	19.005	1	20	543	562	UCGGACCAGGCUUCAUUCCC	UGGGAUGAAGCCUGGUCCGG	Cleavage	seq=cds; coord=1:230535106..230547084:-1; parent_gene=GRMZM2G469551	1
zma-miR166f	gnl|ZmGDB|GRMZM2G042250_T01	2	23.534	1	20	564	583	UCGGACCAGGCUUCAUUCCC	UGGGAUGAAGCCUGGUCCGG	Cleavage	seq=cds; coord=1:2793728..2800641:1; parent_gene=GRMZM2G042250	1
zma-miR166f	gnl|ZmGDB|GRMZM2G042250_T02	2	23.534	1	20	564	583	UCGGACCAGGCUUCAUUCCC	UGGGAUGAAGCCUGGUCCGG	Cleavage	seq=cds; coord=1:2793950..2800638:1; parent_gene=GRMZM2G042250	1
zma-miR166f	gnl|ZmGDB|GRMZM2G109987_T05	2	24.232	1	20	573	592	UCGGACCAGGCUUCAUUCCC	UGGGAUGAAGCCUGGUCCGG	Cleavage	seq=cds; coord=9:154642733..154649986:-1; parent_gene=GRMZM2G109987	1
zma-miR166f	gnl|ZmGDB|GRMZM2G109987_T02	2	24.232	1	20	573	592	UCGGACCAGGCUUCAUUCCC	UGGGAUGAAGCCUGGUCCGG	Cleavage	seq=cds; coord=9:154642336..154650601:-1; parent_gene=GRMZM2G109987	1
zma-miR166f	gnl|ZmGDB|GRMZM2G003509_T01	2	21.036	1	20	588	607	UCGGACCAGGCUUCAUUCCC	UGGGAUGAAGCCUGGUCCGG	Cleavage	seq=cds; coord=1:173233037..173239064:-1; parent_gene=GRMZM2G003509	1
zma-miR166f	gnl|ZmGDB|AC187157.4_FGT005	2	23.173	1	20	564	583	UCGGACCAGGCUUCAUUCCC	CGGGAUGAAGCCUGGUCCGG	Cleavage	seq=cds; coord=8:22640866..22645283:-1; parent_gene=AC187157.4_FG005	1
zma-miR166f	gnl|ZmGDB|GRMZM2G042250_T03	2	23.534	1	20	564	583	UCGGACCAGGCUUCAUUCCC	UGGGAUGAAGCCUGGUCCGG	Cleavage	seq=cds; coord=1:2793728..2800614:1; parent_gene=GRMZM2G042250	1
zma-miR166f	gnl|ZmGDB|GRMZM2G178102_T01	2	20.931	1	20	882	901	UCGGACCAGGCUUCAUUCCC	UGGGAUGAAGCCUGGUCCGG	Cleavage	seq=cds; coord=3:123263423..123270240:-1; parent_gene=GRMZM2G178102	1
zma-miR166f	gnl|ZmGDB|GRMZM2G006062_T01	2.5	22.975	1	20	108	127	UCGGACCAGGCUUCAUUCCC	UGGGAUGAAGCUUGGUCCGG	Cleavage	seq=cds; coord=4:169430032..169431340:1; parent_gene=GRMZM2G006062	1
zma-miR166f	gnl|ZmGDB|AC208827.3_FGT002	2	16.209	1	20	268	287	UCGGACCAGGCUUCAUUCCC	AGGAAUGCAGCCUGGUCCGA	Cleavage	seq=cds; coord=10:47167600..47168316:-1; parent_gene=AC208827.3_FG002	1
zma-miR166f	gnl|ZmGDB|GRMZM2G552083_T01	2.5	19.564	1	20	546	565	UCGGACCAGGCUUCAUUCCC	UGGGAUGGAGCCUGGUCCGG	Cleavage	seq=cds; coord=10:142904755..142908069:1; parent_gene=GRMZM2G552083	1
zma-miR166f	gnl|ZmGDB|GRMZM2G336718_T01	2.5	19.552	1	20	45	64	UCGGACCAGGCUUCAUUCCC	UGGGAUGGAGCCUGGUCCGG	Cleavage	seq=cds; coord=10:102279782..102283839:1; parent_gene=GRMZM2G336718	1
zma-miR166f	gnl|ZmGDB|GRMZM2G123644_T01	2.5	19.564	1	20	546	565	UCGGACCAGGCUUCAUUCCC	UGGGAUGGAGCCUGGUCCGG	Cleavage	seq=cds; coord=10:71608833..71613973:1; parent_gene=GRMZM2G123644	1
zma-miR166f	gnl|ZmGDB|GRMZM2G038198_T01	3	17.689	1	20	486	505	UCGGACCAGGCUUCAUUCCC	UGAGAUGAAGCCUGGUCCGG	Cleavage	seq=cds; coord=10:39623082..39627688:-1; parent_gene=GRMZM2G038198	1
zma-miR166f	gnl|ZmGDB|GRMZM5G897556_T01	2.5	23.965	1	20	254	273	UCGGACCAGGCUUCAUUCCC	GGGGAACAAGCCUGGUCCGA	Cleavage	seq=cds; coord=6:7506596..7507790:-1; parent_gene=GRMZM5G897556	1
zma-miR166f	gnl|ZmGDB|GRMZM2G499154_T01	2.5	19.184	1	20	1129	1148	UCGGACCAGGCUUCAUUCCC	GGGGAACAAGCCUGGUCCGA	Cleavage	seq=cds; coord=2:179016240..179019876:1; parent_gene=GRMZM2G499154	1
zma-miR166g-5p	gnl|ZmGDB|GRMZM2G173542_T02	3	21.717	1	21	352	372	GGAAUGUUGUCUGGUUGGAGA	UUUUCAGCUGGACAACAUUCU	Cleavage	seq=cds; coord=3:182750821..182754835:1; parent_gene=GRMZM2G173542	1
zma-miR166g-5p	gnl|ZmGDB|GRMZM2G173542_T03	3	21.717	1	21	772	792	GGAAUGUUGUCUGGUUGGAGA	UUUUCAGCUGGACAACAUUCU	Cleavage	seq=cds; coord=3:182749400..182752616:1; parent_gene=GRMZM2G173542	1
zma-miR166g-5p	gnl|ZmGDB|GRMZM2G066755_T01	3	22.62	1	21	772	792	GGAAUGUUGUCUGGUUGGAGA	UUUUCAGCUGGACAACAUUCU	Cleavage	seq=cds; coord=8:169623758..169627146:1; parent_gene=GRMZM2G066755	1
zma-miR166g-5p	gnl|ZmGDB|GRMZM2G066755_T02	3	22.62	1	21	772	792	GGAAUGUUGUCUGGUUGGAGA	UUUUCAGCUGGACAACAUUCU	Cleavage	seq=cds; coord=8:169623758..169627127:1; parent_gene=GRMZM2G066755	1
zma-miR166g-5p	gnl|ZmGDB|GRMZM2G173542_T01	3	21.717	1	21	772	792	GGAAUGUUGUCUGGUUGGAGA	UUUUCAGCUGGACAACAUUCU	Cleavage	seq=cds; coord=3:182749400..182757534:1; parent_gene=GRMZM2G173542	1
zma-miR166g-5p	gnl|ZmGDB|GRMZM2G087144_T01	2.5	19.961	1	20	679	698	GGAAUGUUGUCUGGUUGGAG	GACCAACCAGACAACAUUCU	Cleavage	seq=cds; coord=7:141807875..141813323:-1; parent_gene=GRMZM2G087144	1
zma-miR166g-5p	gnl|ZmGDB|GRMZM2G155337_T03	3	12.11	1	20	616	635	GGAAUGUUGUCUGGUUGGAG	GACCAACCAGAGAACAUUCC	Translation	seq=cds; coord=2:194905170..194910667:1; parent_gene=GRMZM2G155337	1
zma-miR166g-5p	gnl|ZmGDB|GRMZM2G155337_T02	3	12.11	1	20	700	719	GGAAUGUUGUCUGGUUGGAG	GACCAACCAGAGAACAUUCC	Translation	seq=cds; coord=2:194904965..194910977:1; parent_gene=GRMZM2G155337	1
zma-miR166g-5p	gnl|ZmGDB|GRMZM2G103078_T01	3	23.896	1	20	1260	1279	GGAAUGUUGUCUGGUUGGAG	GCCCAACGAGACAACAUUCC	Cleavage	seq=cds; coord=6:57596481..57599062:-1; parent_gene=GRMZM2G103078	1
zma-miR166g-5p	gnl|ZmGDB|GRMZM2G538486_T01	3	21.527	1	20	85	104	GGAAUGUUGUCUGGUUGGAG	CUCCAAUUAGAGAAUAUUCU	Translation	seq=cds; coord=8:157006480..157006926:-1; parent_gene=GRMZM2G538486	1
zma-miR166g-3p	gnl|ZmGDB|GRMZM2G109987_T04	2	24.232	1	20	573	592	UCGGACCAGGCUUCAUUCCC	UGGGAUGAAGCCUGGUCCGG	Cleavage	seq=cds; coord=9:154645740..154650601:-1; parent_gene=GRMZM2G109987	1
zma-miR166g-3p	gnl|ZmGDB|GRMZM2G042250_T04	2	23.534	1	20	564	583	UCGGACCAGGCUUCAUUCCC	UGGGAUGAAGCCUGGUCCGG	Cleavage	seq=cds; coord=1:2793728..2798869:1; parent_gene=GRMZM2G042250	1
zma-miR166g-3p	gnl|ZmGDB|GRMZM2G469551_T02	2	19.005	1	20	543	562	UCGGACCAGGCUUCAUUCCC	UGGGAUGAAGCCUGGUCCGG	Cleavage	seq=cds; coord=1:230535887..230547084:-1; parent_gene=GRMZM2G469551	1
zma-miR166g-3p	gnl|ZmGDB|GRMZM2G003509_T02	2	21.178	1	20	45	64	UCGGACCAGGCUUCAUUCCC	UGGGAUGAAGCCUGGUCCGG	Cleavage	seq=cds; coord=1:173233523..173239064:-1; parent_gene=GRMZM2G003509	1
zma-miR166g-3p	gnl|ZmGDB|GRMZM2G109987_T01	2	24.232	1	20	573	592	UCGGACCAGGCUUCAUUCCC	UGGGAUGAAGCCUGGUCCGG	Cleavage	seq=cds; coord=9:154642336..154650601:-1; parent_gene=GRMZM2G109987	1
zma-miR166g-3p	gnl|ZmGDB|GRMZM2G109987_T03	2	24.232	1	20	573	592	UCGGACCAGGCUUCAUUCCC	UGGGAUGAAGCCUGGUCCGG	Cleavage	seq=cds; coord=9:154642336..154650601:-1; parent_gene=GRMZM2G109987	1
zma-miR166g-3p	gnl|ZmGDB|GRMZM2G469551_T01	2	19.005	1	20	543	562	UCGGACCAGGCUUCAUUCCC	UGGGAUGAAGCCUGGUCCGG	Cleavage	seq=cds; coord=1:230535106..230547084:-1; parent_gene=GRMZM2G469551	1
zma-miR166g-3p	gnl|ZmGDB|GRMZM2G042250_T01	2	23.534	1	20	564	583	UCGGACCAGGCUUCAUUCCC	UGGGAUGAAGCCUGGUCCGG	Cleavage	seq=cds; coord=1:2793728..2800641:1; parent_gene=GRMZM2G042250	1
zma-miR166g-3p	gnl|ZmGDB|GRMZM2G042250_T02	2	23.534	1	20	564	583	UCGGACCAGGCUUCAUUCCC	UGGGAUGAAGCCUGGUCCGG	Cleavage	seq=cds; coord=1:2793950..2800638:1; parent_gene=GRMZM2G042250	1
zma-miR166g-3p	gnl|ZmGDB|GRMZM2G109987_T05	2	24.232	1	20	573	592	UCGGACCAGGCUUCAUUCCC	UGGGAUGAAGCCUGGUCCGG	Cleavage	seq=cds; coord=9:154642733..154649986:-1; parent_gene=GRMZM2G109987	1
zma-miR166g-3p	gnl|ZmGDB|GRMZM2G109987_T02	2	24.232	1	20	573	592	UCGGACCAGGCUUCAUUCCC	UGGGAUGAAGCCUGGUCCGG	Cleavage	seq=cds; coord=9:154642336..154650601:-1; parent_gene=GRMZM2G109987	1
zma-miR166g-3p	gnl|ZmGDB|GRMZM2G003509_T01	2	21.036	1	20	588	607	UCGGACCAGGCUUCAUUCCC	UGGGAUGAAGCCUGGUCCGG	Cleavage	seq=cds; coord=1:173233037..173239064:-1; parent_gene=GRMZM2G003509	1
zma-miR166g-3p	gnl|ZmGDB|AC187157.4_FGT005	2	23.173	1	20	564	583	UCGGACCAGGCUUCAUUCCC	CGGGAUGAAGCCUGGUCCGG	Cleavage	seq=cds; coord=8:22640866..22645283:-1; parent_gene=AC187157.4_FG005	1
zma-miR166g-3p	gnl|ZmGDB|GRMZM2G042250_T03	2	23.534	1	20	564	583	UCGGACCAGGCUUCAUUCCC	UGGGAUGAAGCCUGGUCCGG	Cleavage	seq=cds; coord=1:2793728..2800614:1; parent_gene=GRMZM2G042250	1
zma-miR166g-3p	gnl|ZmGDB|GRMZM2G178102_T01	2	20.931	1	20	882	901	UCGGACCAGGCUUCAUUCCC	UGGGAUGAAGCCUGGUCCGG	Cleavage	seq=cds; coord=3:123263423..123270240:-1; parent_gene=GRMZM2G178102	1
zma-miR166g-3p	gnl|ZmGDB|GRMZM2G006062_T01	2.5	22.975	1	20	108	127	UCGGACCAGGCUUCAUUCCC	UGGGAUGAAGCUUGGUCCGG	Cleavage	seq=cds; coord=4:169430032..169431340:1; parent_gene=GRMZM2G006062	1
zma-miR166g-3p	gnl|ZmGDB|AC208827.3_FGT002	2	16.209	1	20	268	287	UCGGACCAGGCUUCAUUCCC	AGGAAUGCAGCCUGGUCCGA	Cleavage	seq=cds; coord=10:47167600..47168316:-1; parent_gene=AC208827.3_FG002	1
zma-miR166g-3p	gnl|ZmGDB|GRMZM2G552083_T01	2.5	19.564	1	20	546	565	UCGGACCAGGCUUCAUUCCC	UGGGAUGGAGCCUGGUCCGG	Cleavage	seq=cds; coord=10:142904755..142908069:1; parent_gene=GRMZM2G552083	1
zma-miR166g-3p	gnl|ZmGDB|GRMZM2G336718_T01	2.5	19.552	1	20	45	64	UCGGACCAGGCUUCAUUCCC	UGGGAUGGAGCCUGGUCCGG	Cleavage	seq=cds; coord=10:102279782..102283839:1; parent_gene=GRMZM2G336718	1
zma-miR166g-3p	gnl|ZmGDB|GRMZM2G123644_T01	2.5	19.564	1	20	546	565	UCGGACCAGGCUUCAUUCCC	UGGGAUGGAGCCUGGUCCGG	Cleavage	seq=cds; coord=10:71608833..71613973:1; parent_gene=GRMZM2G123644	1
zma-miR166g-3p	gnl|ZmGDB|GRMZM2G038198_T01	3	17.689	1	20	486	505	UCGGACCAGGCUUCAUUCCC	UGAGAUGAAGCCUGGUCCGG	Cleavage	seq=cds; coord=10:39623082..39627688:-1; parent_gene=GRMZM2G038198	1
zma-miR166g-3p	gnl|ZmGDB|GRMZM5G897556_T01	2.5	23.965	1	20	254	273	UCGGACCAGGCUUCAUUCCC	GGGGAACAAGCCUGGUCCGA	Cleavage	seq=cds; coord=6:7506596..7507790:-1; parent_gene=GRMZM5G897556	1
zma-miR166g-3p	gnl|ZmGDB|GRMZM2G499154_T01	2.5	19.184	1	20	1129	1148	UCGGACCAGGCUUCAUUCCC	GGGGAACAAGCCUGGUCCGA	Cleavage	seq=cds; coord=2:179016240..179019876:1; parent_gene=GRMZM2G499154	1
zma-miR166b-5p	gnl|ZmGDB|GRMZM2G134903_T01	2.5	17.264	1	21	930	950	GGAAUGUUGUCUGGUUCAAGG	UCUUGAGCCAGACGAUGUUUC	Cleavage	seq=cds; coord=5:34584610..34589024:-1; parent_gene=GRMZM2G134903	1
zma-miR166b-5p	gnl|ZmGDB|GRMZM2G091243_T02	3	14.286	1	21	231	251	GGAAUGUUGUCUGGUUCAAGG	CUUUAAAUCAGACAACAUUUU	Cleavage	seq=cds; coord=4:46423804..46429055:1; parent_gene=GRMZM2G091243	1
zma-miR166b-5p	gnl|ZmGDB|GRMZM2G091243_T01	3	14.286	1	21	483	503	GGAAUGUUGUCUGGUUCAAGG	CUUUAAAUCAGACAACAUUUU	Cleavage	seq=cds; coord=4:46423298..46429421:1; parent_gene=GRMZM2G091243	1
zma-miR166b-5p	gnl|ZmGDB|GRMZM2G446189_T01	3	21.933	1	21	597	617	GGAAUGUUGUCUGGUUCAAGG	CUUUAGGCCAGACAACAUUCU	Cleavage	seq=cds; coord=4:35220862..35224040:-1; parent_gene=GRMZM2G446189	1
zma-miR166b-5p	gnl|ZmGDB|GRMZM2G048801_T01	3	13.714	1	21	1080	1100	GGAAUGUUGUCUGGUUCAAGG	UCUUGAGCUAAAUAACAUUUC	Translation	seq=cds; coord=4:4089239..4092552:1; parent_gene=GRMZM2G048801	1
zma-miR166b-3p	gnl|ZmGDB|GRMZM2G109987_T04	2	24.232	1	20	573	592	UCGGACCAGGCUUCAUUCCC	UGGGAUGAAGCCUGGUCCGG	Cleavage	seq=cds; coord=9:154645740..154650601:-1; parent_gene=GRMZM2G109987	1
zma-miR166b-3p	gnl|ZmGDB|GRMZM2G042250_T04	2	23.534	1	20	564	583	UCGGACCAGGCUUCAUUCCC	UGGGAUGAAGCCUGGUCCGG	Cleavage	seq=cds; coord=1:2793728..2798869:1; parent_gene=GRMZM2G042250	1
zma-miR166b-3p	gnl|ZmGDB|GRMZM2G469551_T02	2	19.005	1	20	543	562	UCGGACCAGGCUUCAUUCCC	UGGGAUGAAGCCUGGUCCGG	Cleavage	seq=cds; coord=1:230535887..230547084:-1; parent_gene=GRMZM2G469551	1
zma-miR166b-3p	gnl|ZmGDB|GRMZM2G003509_T02	2	21.178	1	20	45	64	UCGGACCAGGCUUCAUUCCC	UGGGAUGAAGCCUGGUCCGG	Cleavage	seq=cds; coord=1:173233523..173239064:-1; parent_gene=GRMZM2G003509	1
zma-miR166b-3p	gnl|ZmGDB|GRMZM2G109987_T01	2	24.232	1	20	573	592	UCGGACCAGGCUUCAUUCCC	UGGGAUGAAGCCUGGUCCGG	Cleavage	seq=cds; coord=9:154642336..154650601:-1; parent_gene=GRMZM2G109987	1
zma-miR166b-3p	gnl|ZmGDB|GRMZM2G109987_T03	2	24.232	1	20	573	592	UCGGACCAGGCUUCAUUCCC	UGGGAUGAAGCCUGGUCCGG	Cleavage	seq=cds; coord=9:154642336..154650601:-1; parent_gene=GRMZM2G109987	1
zma-miR166b-3p	gnl|ZmGDB|GRMZM2G469551_T01	2	19.005	1	20	543	562	UCGGACCAGGCUUCAUUCCC	UGGGAUGAAGCCUGGUCCGG	Cleavage	seq=cds; coord=1:230535106..230547084:-1; parent_gene=GRMZM2G469551	1
zma-miR166b-3p	gnl|ZmGDB|GRMZM2G042250_T01	2	23.534	1	20	564	583	UCGGACCAGGCUUCAUUCCC	UGGGAUGAAGCCUGGUCCGG	Cleavage	seq=cds; coord=1:2793728..2800641:1; parent_gene=GRMZM2G042250	1
zma-miR166b-3p	gnl|ZmGDB|GRMZM2G042250_T02	2	23.534	1	20	564	583	UCGGACCAGGCUUCAUUCCC	UGGGAUGAAGCCUGGUCCGG	Cleavage	seq=cds; coord=1:2793950..2800638:1; parent_gene=GRMZM2G042250	1
zma-miR166b-3p	gnl|ZmGDB|GRMZM2G109987_T05	2	24.232	1	20	573	592	UCGGACCAGGCUUCAUUCCC	UGGGAUGAAGCCUGGUCCGG	Cleavage	seq=cds; coord=9:154642733..154649986:-1; parent_gene=GRMZM2G109987	1
zma-miR166b-3p	gnl|ZmGDB|GRMZM2G109987_T02	2	24.232	1	20	573	592	UCGGACCAGGCUUCAUUCCC	UGGGAUGAAGCCUGGUCCGG	Cleavage	seq=cds; coord=9:154642336..154650601:-1; parent_gene=GRMZM2G109987	1
zma-miR166b-3p	gnl|ZmGDB|GRMZM2G003509_T01	2	21.036	1	20	588	607	UCGGACCAGGCUUCAUUCCC	UGGGAUGAAGCCUGGUCCGG	Cleavage	seq=cds; coord=1:173233037..173239064:-1; parent_gene=GRMZM2G003509	1
zma-miR166b-3p	gnl|ZmGDB|AC187157.4_FGT005	2	23.173	1	20	564	583	UCGGACCAGGCUUCAUUCCC	CGGGAUGAAGCCUGGUCCGG	Cleavage	seq=cds; coord=8:22640866..22645283:-1; parent_gene=AC187157.4_FG005	1
zma-miR166b-3p	gnl|ZmGDB|GRMZM2G042250_T03	2	23.534	1	20	564	583	UCGGACCAGGCUUCAUUCCC	UGGGAUGAAGCCUGGUCCGG	Cleavage	seq=cds; coord=1:2793728..2800614:1; parent_gene=GRMZM2G042250	1
zma-miR166b-3p	gnl|ZmGDB|GRMZM2G178102_T01	2	20.931	1	20	882	901	UCGGACCAGGCUUCAUUCCC	UGGGAUGAAGCCUGGUCCGG	Cleavage	seq=cds; coord=3:123263423..123270240:-1; parent_gene=GRMZM2G178102	1
zma-miR166b-3p	gnl|ZmGDB|GRMZM2G006062_T01	2.5	22.975	1	20	108	127	UCGGACCAGGCUUCAUUCCC	UGGGAUGAAGCUUGGUCCGG	Cleavage	seq=cds; coord=4:169430032..169431340:1; parent_gene=GRMZM2G006062	1
zma-miR166b-3p	gnl|ZmGDB|AC208827.3_FGT002	2	16.209	1	20	268	287	UCGGACCAGGCUUCAUUCCC	AGGAAUGCAGCCUGGUCCGA	Cleavage	seq=cds; coord=10:47167600..47168316:-1; parent_gene=AC208827.3_FG002	1
zma-miR166b-3p	gnl|ZmGDB|GRMZM2G552083_T01	2.5	19.564	1	20	546	565	UCGGACCAGGCUUCAUUCCC	UGGGAUGGAGCCUGGUCCGG	Cleavage	seq=cds; coord=10:142904755..142908069:1; parent_gene=GRMZM2G552083	1
zma-miR166b-3p	gnl|ZmGDB|GRMZM2G336718_T01	2.5	19.552	1	20	45	64	UCGGACCAGGCUUCAUUCCC	UGGGAUGGAGCCUGGUCCGG	Cleavage	seq=cds; coord=10:102279782..102283839:1; parent_gene=GRMZM2G336718	1
zma-miR166b-3p	gnl|ZmGDB|GRMZM2G123644_T01	2.5	19.564	1	20	546	565	UCGGACCAGGCUUCAUUCCC	UGGGAUGGAGCCUGGUCCGG	Cleavage	seq=cds; coord=10:71608833..71613973:1; parent_gene=GRMZM2G123644	1
zma-miR166b-3p	gnl|ZmGDB|GRMZM2G038198_T01	3	17.689	1	20	486	505	UCGGACCAGGCUUCAUUCCC	UGAGAUGAAGCCUGGUCCGG	Cleavage	seq=cds; coord=10:39623082..39627688:-1; parent_gene=GRMZM2G038198	1
zma-miR166b-3p	gnl|ZmGDB|GRMZM5G897556_T01	2.5	23.965	1	20	254	273	UCGGACCAGGCUUCAUUCCC	GGGGAACAAGCCUGGUCCGA	Cleavage	seq=cds; coord=6:7506596..7507790:-1; parent_gene=GRMZM5G897556	1
zma-miR166b-3p	gnl|ZmGDB|GRMZM2G499154_T01	2.5	19.184	1	20	1129	1148	UCGGACCAGGCUUCAUUCCC	GGGGAACAAGCCUGGUCCGA	Cleavage	seq=cds; coord=2:179016240..179019876:1; parent_gene=GRMZM2G499154	1
zma-miR166c-5p	gnl|ZmGDB|GRMZM2G495837_T01	2	8.913	1	21	448	468	GGAAUGUUGUCUGGCUCGAGG	UUUCGAGACAGACAACAUUUC	Cleavage	seq=cds; coord=7:68313629..68317632:1; parent_gene=GRMZM2G495837	1
zma-miR166c-5p	gnl|ZmGDB|GRMZM2G137820_T03	2	9.639	1	21	334	354	GGAAUGUUGUCUGGCUCGAGG	UUUCGAGACAGACAACAUUUC	Cleavage	seq=cds; coord=6:128663003..128666516:1; parent_gene=GRMZM2G137820	1
zma-miR166c-5p	gnl|ZmGDB|GRMZM2G326851_T01	2.5	22.56	1	21	1010	1030	GGAAUGUUGUCUGGCUCGAGG	CUUCGAGCCAGGCCACGUUCC	Cleavage	seq=cds; coord=10:125298128..125300187:1; parent_gene=GRMZM2G326851	1
zma-miR166c-5p	gnl|ZmGDB|GRMZM2G134903_T01	2.5	17.264	1	21	930	950	GGAAUGUUGUCUGGCUCGAGG	UCUUGAGCCAGACGAUGUUUC	Cleavage	seq=cds; coord=5:34584610..34589024:-1; parent_gene=GRMZM2G134903	1
zma-miR166c-5p	gnl|ZmGDB|GRMZM2G137820_T02	2	9.639	1	21	334	354	GGAAUGUUGUCUGGCUCGAGG	UUUCGAGACAGACAACAUUUC	Cleavage	seq=cds; coord=6:128663003..128669641:1; parent_gene=GRMZM2G137820	1
zma-miR166c-5p	gnl|ZmGDB|GRMZM2G156694_T01	3	16.937	1	21	147	167	GGAAUGUUGUCUGGCUCGAGG	UCUCGAGUCAGAUAACCUUCU	Cleavage	seq=cds; coord=5:131184356..131184779:1; parent_gene=GRMZM2G156694	1
zma-miR166c-5p	gnl|ZmGDB|GRMZM2G410191_T02	3	19.431	1	21	438	458	GGAAUGUUGUCUGGCUCGAGG	CUUCAGGCCAGACAAUAUUCU	Cleavage	seq=cds; coord=10:125828794..125834952:-1; parent_gene=GRMZM2G410191	1
zma-miR166c-5p	gnl|ZmGDB|GRMZM2G410191_T01	3	19.431	1	21	438	458	GGAAUGUUGUCUGGCUCGAGG	CUUCAGGCCAGACAAUAUUCU	Cleavage	seq=cds; coord=10:125829143..125834952:-1; parent_gene=GRMZM2G410191	1
zma-miR166c-5p	gnl|ZmGDB|GRMZM2G446189_T01	3	21.933	1	21	597	617	GGAAUGUUGUCUGGCUCGAGG	CUUUAGGCCAGACAACAUUCU	Cleavage	seq=cds; coord=4:35220862..35224040:-1; parent_gene=GRMZM2G446189	1
zma-miR166c-5p	gnl|ZmGDB|GRMZM2G013848_T01	3	23.296	1	21	893	913	GGAAUGUUGUCUGGCUCGAGG	CUUCGAGCCAGGCCGCGUUCC	Cleavage	seq=cds; coord=5:215846665..215848735:1; parent_gene=GRMZM2G013848	1
zma-miR166c-5p	gnl|ZmGDB|GRMZM2G389097_T01	3	23.572	1	21	1427	1447	GGAAUGUUGUCUGGCUCGAGG	CUUCGAGCCAGGCCGCGUUCC	Cleavage	seq=cds; coord=2:59740878..59756086:1; parent_gene=GRMZM2G389097	1
zma-miR166c-5p	gnl|ZmGDB|GRMZM2G048801_T01	3	13.714	1	21	1080	1100	GGAAUGUUGUCUGGCUCGAGG	UCUUGAGCUAAAUAACAUUUC	Translation	seq=cds; coord=4:4089239..4092552:1; parent_gene=GRMZM2G048801	1
zma-miR166c-3p	gnl|ZmGDB|GRMZM2G109987_T04	2	24.232	1	20	573	592	UCGGACCAGGCUUCAUUCCC	UGGGAUGAAGCCUGGUCCGG	Cleavage	seq=cds; coord=9:154645740..154650601:-1; parent_gene=GRMZM2G109987	1
zma-miR166c-3p	gnl|ZmGDB|GRMZM2G042250_T04	2	23.534	1	20	564	583	UCGGACCAGGCUUCAUUCCC	UGGGAUGAAGCCUGGUCCGG	Cleavage	seq=cds; coord=1:2793728..2798869:1; parent_gene=GRMZM2G042250	1
zma-miR166c-3p	gnl|ZmGDB|GRMZM2G469551_T02	2	19.005	1	20	543	562	UCGGACCAGGCUUCAUUCCC	UGGGAUGAAGCCUGGUCCGG	Cleavage	seq=cds; coord=1:230535887..230547084:-1; parent_gene=GRMZM2G469551	1
zma-miR166c-3p	gnl|ZmGDB|GRMZM2G003509_T02	2	21.178	1	20	45	64	UCGGACCAGGCUUCAUUCCC	UGGGAUGAAGCCUGGUCCGG	Cleavage	seq=cds; coord=1:173233523..173239064:-1; parent_gene=GRMZM2G003509	1
zma-miR166c-3p	gnl|ZmGDB|GRMZM2G109987_T01	2	24.232	1	20	573	592	UCGGACCAGGCUUCAUUCCC	UGGGAUGAAGCCUGGUCCGG	Cleavage	seq=cds; coord=9:154642336..154650601:-1; parent_gene=GRMZM2G109987	1
zma-miR166c-3p	gnl|ZmGDB|GRMZM2G109987_T03	2	24.232	1	20	573	592	UCGGACCAGGCUUCAUUCCC	UGGGAUGAAGCCUGGUCCGG	Cleavage	seq=cds; coord=9:154642336..154650601:-1; parent_gene=GRMZM2G109987	1
zma-miR166c-3p	gnl|ZmGDB|GRMZM2G469551_T01	2	19.005	1	20	543	562	UCGGACCAGGCUUCAUUCCC	UGGGAUGAAGCCUGGUCCGG	Cleavage	seq=cds; coord=1:230535106..230547084:-1; parent_gene=GRMZM2G469551	1
zma-miR166c-3p	gnl|ZmGDB|GRMZM2G042250_T01	2	23.534	1	20	564	583	UCGGACCAGGCUUCAUUCCC	UGGGAUGAAGCCUGGUCCGG	Cleavage	seq=cds; coord=1:2793728..2800641:1; parent_gene=GRMZM2G042250	1
zma-miR166c-3p	gnl|ZmGDB|GRMZM2G042250_T02	2	23.534	1	20	564	583	UCGGACCAGGCUUCAUUCCC	UGGGAUGAAGCCUGGUCCGG	Cleavage	seq=cds; coord=1:2793950..2800638:1; parent_gene=GRMZM2G042250	1
zma-miR166c-3p	gnl|ZmGDB|GRMZM2G109987_T05	2	24.232	1	20	573	592	UCGGACCAGGCUUCAUUCCC	UGGGAUGAAGCCUGGUCCGG	Cleavage	seq=cds; coord=9:154642733..154649986:-1; parent_gene=GRMZM2G109987	1
zma-miR166c-3p	gnl|ZmGDB|GRMZM2G109987_T02	2	24.232	1	20	573	592	UCGGACCAGGCUUCAUUCCC	UGGGAUGAAGCCUGGUCCGG	Cleavage	seq=cds; coord=9:154642336..154650601:-1; parent_gene=GRMZM2G109987	1
zma-miR166c-3p	gnl|ZmGDB|GRMZM2G003509_T01	2	21.036	1	20	588	607	UCGGACCAGGCUUCAUUCCC	UGGGAUGAAGCCUGGUCCGG	Cleavage	seq=cds; coord=1:173233037..173239064:-1; parent_gene=GRMZM2G003509	1
zma-miR166c-3p	gnl|ZmGDB|AC187157.4_FGT005	2	23.173	1	20	564	583	UCGGACCAGGCUUCAUUCCC	CGGGAUGAAGCCUGGUCCGG	Cleavage	seq=cds; coord=8:22640866..22645283:-1; parent_gene=AC187157.4_FG005	1
zma-miR166c-3p	gnl|ZmGDB|GRMZM2G042250_T03	2	23.534	1	20	564	583	UCGGACCAGGCUUCAUUCCC	UGGGAUGAAGCCUGGUCCGG	Cleavage	seq=cds; coord=1:2793728..2800614:1; parent_gene=GRMZM2G042250	1
zma-miR166c-3p	gnl|ZmGDB|GRMZM2G178102_T01	2	20.931	1	20	882	901	UCGGACCAGGCUUCAUUCCC	UGGGAUGAAGCCUGGUCCGG	Cleavage	seq=cds; coord=3:123263423..123270240:-1; parent_gene=GRMZM2G178102	1
zma-miR166c-3p	gnl|ZmGDB|GRMZM2G006062_T01	2.5	22.975	1	20	108	127	UCGGACCAGGCUUCAUUCCC	UGGGAUGAAGCUUGGUCCGG	Cleavage	seq=cds; coord=4:169430032..169431340:1; parent_gene=GRMZM2G006062	1
zma-miR166c-3p	gnl|ZmGDB|AC208827.3_FGT002	2	16.209	1	20	268	287	UCGGACCAGGCUUCAUUCCC	AGGAAUGCAGCCUGGUCCGA	Cleavage	seq=cds; coord=10:47167600..47168316:-1; parent_gene=AC208827.3_FG002	1
zma-miR166c-3p	gnl|ZmGDB|GRMZM2G552083_T01	2.5	19.564	1	20	546	565	UCGGACCAGGCUUCAUUCCC	UGGGAUGGAGCCUGGUCCGG	Cleavage	seq=cds; coord=10:142904755..142908069:1; parent_gene=GRMZM2G552083	1
zma-miR166c-3p	gnl|ZmGDB|GRMZM2G336718_T01	2.5	19.552	1	20	45	64	UCGGACCAGGCUUCAUUCCC	UGGGAUGGAGCCUGGUCCGG	Cleavage	seq=cds; coord=10:102279782..102283839:1; parent_gene=GRMZM2G336718	1
zma-miR166c-3p	gnl|ZmGDB|GRMZM2G123644_T01	2.5	19.564	1	20	546	565	UCGGACCAGGCUUCAUUCCC	UGGGAUGGAGCCUGGUCCGG	Cleavage	seq=cds; coord=10:71608833..71613973:1; parent_gene=GRMZM2G123644	1
zma-miR166c-3p	gnl|ZmGDB|GRMZM2G038198_T01	3	17.689	1	20	486	505	UCGGACCAGGCUUCAUUCCC	UGAGAUGAAGCCUGGUCCGG	Cleavage	seq=cds; coord=10:39623082..39627688:-1; parent_gene=GRMZM2G038198	1
zma-miR166c-3p	gnl|ZmGDB|GRMZM5G897556_T01	2.5	23.965	1	20	254	273	UCGGACCAGGCUUCAUUCCC	GGGGAACAAGCCUGGUCCGA	Cleavage	seq=cds; coord=6:7506596..7507790:-1; parent_gene=GRMZM5G897556	1
zma-miR166c-3p	gnl|ZmGDB|GRMZM2G499154_T01	2.5	19.184	1	20	1129	1148	UCGGACCAGGCUUCAUUCCC	GGGGAACAAGCCUGGUCCGA	Cleavage	seq=cds; coord=2:179016240..179019876:1; parent_gene=GRMZM2G499154	1
zma-miR166d-5p	gnl|ZmGDB|GRMZM2G134903_T01	2.5	17.264	1	21	930	950	GGAAUGUUGUCUGGUUCAAGG	UCUUGAGCCAGACGAUGUUUC	Cleavage	seq=cds; coord=5:34584610..34589024:-1; parent_gene=GRMZM2G134903	1
zma-miR166d-5p	gnl|ZmGDB|GRMZM2G091243_T02	3	14.286	1	21	231	251	GGAAUGUUGUCUGGUUCAAGG	CUUUAAAUCAGACAACAUUUU	Cleavage	seq=cds; coord=4:46423804..46429055:1; parent_gene=GRMZM2G091243	1
zma-miR166d-5p	gnl|ZmGDB|GRMZM2G091243_T01	3	14.286	1	21	483	503	GGAAUGUUGUCUGGUUCAAGG	CUUUAAAUCAGACAACAUUUU	Cleavage	seq=cds; coord=4:46423298..46429421:1; parent_gene=GRMZM2G091243	1
zma-miR166d-5p	gnl|ZmGDB|GRMZM2G446189_T01	3	21.933	1	21	597	617	GGAAUGUUGUCUGGUUCAAGG	CUUUAGGCCAGACAACAUUCU	Cleavage	seq=cds; coord=4:35220862..35224040:-1; parent_gene=GRMZM2G446189	1
zma-miR166d-5p	gnl|ZmGDB|GRMZM2G048801_T01	3	13.714	1	21	1080	1100	GGAAUGUUGUCUGGUUCAAGG	UCUUGAGCUAAAUAACAUUUC	Translation	seq=cds; coord=4:4089239..4092552:1; parent_gene=GRMZM2G048801	1
zma-miR166d-3p	gnl|ZmGDB|GRMZM2G109987_T04	2	24.232	1	20	573	592	UCGGACCAGGCUUCAUUCCC	UGGGAUGAAGCCUGGUCCGG	Cleavage	seq=cds; coord=9:154645740..154650601:-1; parent_gene=GRMZM2G109987	1
zma-miR166d-3p	gnl|ZmGDB|GRMZM2G042250_T04	2	23.534	1	20	564	583	UCGGACCAGGCUUCAUUCCC	UGGGAUGAAGCCUGGUCCGG	Cleavage	seq=cds; coord=1:2793728..2798869:1; parent_gene=GRMZM2G042250	1
zma-miR166d-3p	gnl|ZmGDB|GRMZM2G469551_T02	2	19.005	1	20	543	562	UCGGACCAGGCUUCAUUCCC	UGGGAUGAAGCCUGGUCCGG	Cleavage	seq=cds; coord=1:230535887..230547084:-1; parent_gene=GRMZM2G469551	1
zma-miR166d-3p	gnl|ZmGDB|GRMZM2G003509_T02	2	21.178	1	20	45	64	UCGGACCAGGCUUCAUUCCC	UGGGAUGAAGCCUGGUCCGG	Cleavage	seq=cds; coord=1:173233523..173239064:-1; parent_gene=GRMZM2G003509	1
zma-miR166d-3p	gnl|ZmGDB|GRMZM2G109987_T01	2	24.232	1	20	573	592	UCGGACCAGGCUUCAUUCCC	UGGGAUGAAGCCUGGUCCGG	Cleavage	seq=cds; coord=9:154642336..154650601:-1; parent_gene=GRMZM2G109987	1
zma-miR166d-3p	gnl|ZmGDB|GRMZM2G109987_T03	2	24.232	1	20	573	592	UCGGACCAGGCUUCAUUCCC	UGGGAUGAAGCCUGGUCCGG	Cleavage	seq=cds; coord=9:154642336..154650601:-1; parent_gene=GRMZM2G109987	1
zma-miR166d-3p	gnl|ZmGDB|GRMZM2G469551_T01	2	19.005	1	20	543	562	UCGGACCAGGCUUCAUUCCC	UGGGAUGAAGCCUGGUCCGG	Cleavage	seq=cds; coord=1:230535106..230547084:-1; parent_gene=GRMZM2G469551	1
zma-miR166d-3p	gnl|ZmGDB|GRMZM2G042250_T01	2	23.534	1	20	564	583	UCGGACCAGGCUUCAUUCCC	UGGGAUGAAGCCUGGUCCGG	Cleavage	seq=cds; coord=1:2793728..2800641:1; parent_gene=GRMZM2G042250	1
zma-miR166d-3p	gnl|ZmGDB|GRMZM2G042250_T02	2	23.534	1	20	564	583	UCGGACCAGGCUUCAUUCCC	UGGGAUGAAGCCUGGUCCGG	Cleavage	seq=cds; coord=1:2793950..2800638:1; parent_gene=GRMZM2G042250	1
zma-miR166d-3p	gnl|ZmGDB|GRMZM2G109987_T05	2	24.232	1	20	573	592	UCGGACCAGGCUUCAUUCCC	UGGGAUGAAGCCUGGUCCGG	Cleavage	seq=cds; coord=9:154642733..154649986:-1; parent_gene=GRMZM2G109987	1
zma-miR166d-3p	gnl|ZmGDB|GRMZM2G109987_T02	2	24.232	1	20	573	592	UCGGACCAGGCUUCAUUCCC	UGGGAUGAAGCCUGGUCCGG	Cleavage	seq=cds; coord=9:154642336..154650601:-1; parent_gene=GRMZM2G109987	1
zma-miR166d-3p	gnl|ZmGDB|GRMZM2G003509_T01	2	21.036	1	20	588	607	UCGGACCAGGCUUCAUUCCC	UGGGAUGAAGCCUGGUCCGG	Cleavage	seq=cds; coord=1:173233037..173239064:-1; parent_gene=GRMZM2G003509	1
zma-miR166d-3p	gnl|ZmGDB|AC187157.4_FGT005	2	23.173	1	20	564	583	UCGGACCAGGCUUCAUUCCC	CGGGAUGAAGCCUGGUCCGG	Cleavage	seq=cds; coord=8:22640866..22645283:-1; parent_gene=AC187157.4_FG005	1
zma-miR166d-3p	gnl|ZmGDB|GRMZM2G042250_T03	2	23.534	1	20	564	583	UCGGACCAGGCUUCAUUCCC	UGGGAUGAAGCCUGGUCCGG	Cleavage	seq=cds; coord=1:2793728..2800614:1; parent_gene=GRMZM2G042250	1
zma-miR166d-3p	gnl|ZmGDB|GRMZM2G178102_T01	2	20.931	1	20	882	901	UCGGACCAGGCUUCAUUCCC	UGGGAUGAAGCCUGGUCCGG	Cleavage	seq=cds; coord=3:123263423..123270240:-1; parent_gene=GRMZM2G178102	1
zma-miR166d-3p	gnl|ZmGDB|GRMZM2G006062_T01	2.5	22.975	1	20	108	127	UCGGACCAGGCUUCAUUCCC	UGGGAUGAAGCUUGGUCCGG	Cleavage	seq=cds; coord=4:169430032..169431340:1; parent_gene=GRMZM2G006062	1
zma-miR166d-3p	gnl|ZmGDB|AC208827.3_FGT002	2	16.209	1	20	268	287	UCGGACCAGGCUUCAUUCCC	AGGAAUGCAGCCUGGUCCGA	Cleavage	seq=cds; coord=10:47167600..47168316:-1; parent_gene=AC208827.3_FG002	1
zma-miR166d-3p	gnl|ZmGDB|GRMZM2G552083_T01	2.5	19.564	1	20	546	565	UCGGACCAGGCUUCAUUCCC	UGGGAUGGAGCCUGGUCCGG	Cleavage	seq=cds; coord=10:142904755..142908069:1; parent_gene=GRMZM2G552083	1
zma-miR166d-3p	gnl|ZmGDB|GRMZM2G336718_T01	2.5	19.552	1	20	45	64	UCGGACCAGGCUUCAUUCCC	UGGGAUGGAGCCUGGUCCGG	Cleavage	seq=cds; coord=10:102279782..102283839:1; parent_gene=GRMZM2G336718	1
zma-miR166d-3p	gnl|ZmGDB|GRMZM2G123644_T01	2.5	19.564	1	20	546	565	UCGGACCAGGCUUCAUUCCC	UGGGAUGGAGCCUGGUCCGG	Cleavage	seq=cds; coord=10:71608833..71613973:1; parent_gene=GRMZM2G123644	1
zma-miR166d-3p	gnl|ZmGDB|GRMZM2G038198_T01	3	17.689	1	20	486	505	UCGGACCAGGCUUCAUUCCC	UGAGAUGAAGCCUGGUCCGG	Cleavage	seq=cds; coord=10:39623082..39627688:-1; parent_gene=GRMZM2G038198	1
zma-miR166d-3p	gnl|ZmGDB|GRMZM5G897556_T01	2.5	23.965	1	20	254	273	UCGGACCAGGCUUCAUUCCC	GGGGAACAAGCCUGGUCCGA	Cleavage	seq=cds; coord=6:7506596..7507790:-1; parent_gene=GRMZM5G897556	1
zma-miR166d-3p	gnl|ZmGDB|GRMZM2G499154_T01	2.5	19.184	1	20	1129	1148	UCGGACCAGGCUUCAUUCCC	GGGGAACAAGCCUGGUCCGA	Cleavage	seq=cds; coord=2:179016240..179019876:1; parent_gene=GRMZM2G499154	1
zma-miR171a-5p	gnl|ZmGDB|GRMZM2G508843_T01	2.5	14.049	1	21	36	55	UAUUGGCGAGGUUCAAUCAGA	UCUGAUUGA-CCUCGUCAAUA	Cleavage	seq=cds; coord=6:134143703..134143810:1; parent_gene=GRMZM2G508843	1
zma-miR171a-5p	gnl|ZmGDB|GRMZM2G080851_T01	3	16.712	1	20	495	514	UAUUGGCGAGGUUCAAUCAG	CUGGCUGGACCUUGCCGAUA	Cleavage	seq=cds; coord=8:112896020..112902572:1; parent_gene=GRMZM2G080851	1
zma-miR171a-3p	gnl|ZmGDB|GRMZM2G317338_T01	0	23.512	1	20	253	272	UGAUUGAGCCGCGCCAAUAU	AUAUUGGCGCGGCUCAAUCA	Cleavage	seq=cds; coord=6:2909967..2910502:1; parent_gene=GRMZM2G317338	1
zma-miR171a-3p	gnl|ZmGDB|GRMZM2G098800_T01	0	23.516	1	20	421	440	UGAUUGAGCCGCGCCAAUAU	AUAUUGGCGCGGCUCAAUCA	Cleavage	seq=cds; coord=4:153196436..153199541:1; parent_gene=GRMZM2G098800	1
zma-miR171a-3p	gnl|ZmGDB|GRMZM2G098800_T02	0	23.516	1	20	1108	1127	UGAUUGAGCCGCGCCAAUAU	AUAUUGGCGCGGCUCAAUCA	Cleavage	seq=cds; coord=4:153196404..153199186:1; parent_gene=GRMZM2G098800	1
zma-miR171a-3p	gnl|ZmGDB|AC187788.3_FGT008	0.5	22.707	1	20	145	164	UGAUUGAGCCGCGCCAAUAU	AUAUUGGCGCGGCUCAAUUA	Cleavage	seq=cds; coord=7:165554811..165555298:-1; parent_gene=AC187788.3_FG008	1
zma-miR171a-3p	gnl|ZmGDB|GRMZM2G477666_T01	1.5	20.615	1	20	220	239	UGAUUGAGCCGCGCCAAUAU	AUAUUGGCGCAGCUCAAUUA	Translation	seq=cds; coord=9:143369964..143371910:-1; parent_gene=GRMZM2G477666	1
zma-miR171a-3p	gnl|ZmGDB|GRMZM2G082167_T01	3	24.151	1	20	719	738	UGAUUGAGCCGCGCCAAUAU	CUGUUGGUGCUGCUCAAUCA	Translation	seq=cds; coord=10:26984538..26988303:1; parent_gene=GRMZM2G082167	1
zma-miR171a-3p	gnl|ZmGDB|GRMZM2G060265_T01	3	23.598	1	20	439	458	UGAUUGAGCCGCGCCAAUAU	AUACUGGCGCGGCUCAACUA	Cleavage	seq=cds; coord=1:1955584..1957660:1; parent_gene=GRMZM2G060265	1
zma-miR171b-5p	gnl|ZmGDB|GRMZM2G071502_T01	3	19.046	1	20	45	64	GAUAUUGGCGCGGUUCAAUC	GAUUGAUUCGCGUCAAUAUG	Cleavage	seq=cds; coord=5:148896609..148896908:-1; parent_gene=GRMZM2G071502	1
zma-miR171b-3p	gnl|ZmGDB|GRMZM2G317338_T01	1.5	22.308	1	20	250	269	UUGAGCCGUGCCAAUAUCAC	GCGAUAUUGGCGCGGCUCAA	Cleavage	seq=cds; coord=6:2909967..2910502:1; parent_gene=GRMZM2G317338	1
zma-miR171b-3p	gnl|ZmGDB|AC187788.3_FGT008	1.5	24.175	1	20	142	161	UUGAGCCGUGCCAAUAUCAC	GAGAUAUUGGCGCGGCUCAA	Cleavage	seq=cds; coord=7:165554811..165555298:-1; parent_gene=AC187788.3_FG008	1
zma-miR171b-3p	gnl|ZmGDB|GRMZM2G011947_T01	1.5	24.467	1	20	166	185	UUGAGCCGUGCCAAUAUCAC	GAGAUAUUGGCGCGGCUCAA	Cleavage	seq=cds; coord=6:55396619..55397567:1; parent_gene=GRMZM2G011947	1
zma-miR171b-3p	gnl|ZmGDB|GRMZM2G098800_T01	1.5	23.315	1	20	418	437	UUGAGCCGUGCCAAUAUCAC	GAGAUAUUGGCGCGGCUCAA	Cleavage	seq=cds; coord=4:153196436..153199541:1; parent_gene=GRMZM2G098800	1
zma-miR171b-3p	gnl|ZmGDB|GRMZM2G110579_T01	1.5	23.999	1	20	769	788	UUGAGCCGUGCCAAUAUCAC	GCGAUAUUGGCGCGGCUCAA	Cleavage	seq=cds; coord=5:192846362..192849106:1; parent_gene=GRMZM2G110579	1
zma-miR171b-3p	gnl|ZmGDB|GRMZM2G098800_T02	1.5	23.315	1	20	1105	1124	UUGAGCCGUGCCAAUAUCAC	GAGAUAUUGGCGCGGCUCAA	Cleavage	seq=cds; coord=4:153196404..153199186:1; parent_gene=GRMZM2G098800	1
zma-miR171b-3p	gnl|ZmGDB|GRMZM2G477666_T01	3	23.164	1	20	217	236	UUGAGCCGUGCCAAUAUCAC	GAGAUAUUGGCGCAGCUCAA	Cleavage	seq=cds; coord=9:143369964..143371910:-1; parent_gene=GRMZM2G477666	1
zma-miR171b-3p	gnl|ZmGDB|GRMZM2G021471_T01	2.5	15.348	1	20	365	384	UUGAGCCGUGCCAAUAUCAC	GUGAAAAUGGCAUGGCUCAA	Cleavage	seq=cds; coord=3:134018680..134023296:-1; parent_gene=GRMZM2G021471	1
zma-miR171b-3p	gnl|ZmGDB|GRMZM2G143480_T04	3	21.516	1	20	235	254	UUGAGCCGUGCCAAUAUCAC	GUGGUUGUGGCACGGUUCAA	Cleavage	seq=cds; coord=10:145895459..145900491:1; parent_gene=GRMZM2G143480	1
zma-miR171b-3p	gnl|ZmGDB|GRMZM2G143480_T03	3	21.516	1	20	229	248	UUGAGCCGUGCCAAUAUCAC	GUGGUUGUGGCACGGUUCAA	Cleavage	seq=cds; coord=10:145895459..145900494:1; parent_gene=GRMZM2G143480	1
zma-miR171b-3p	gnl|ZmGDB|GRMZM2G143480_T01	3	21.516	1	20	229	248	UUGAGCCGUGCCAAUAUCAC	GUGGUUGUGGCACGGUUCAA	Cleavage	seq=cds; coord=10:145895417..145903773:1; parent_gene=GRMZM2G143480	1
zma-miR171b-3p	gnl|ZmGDB|GRMZM2G143480_T02	3	21.516	1	20	235	254	UUGAGCCGUGCCAAUAUCAC	GUGGUUGUGGCACGGUUCAA	Cleavage	seq=cds; coord=10:145895430..145900495:1; parent_gene=GRMZM2G143480	1
zma-miR171b-3p	gnl|ZmGDB|GRMZM2G033219_T01	3	18.449	1	20	235	254	UUGAGCCGUGCCAAUAUCAC	GUGGUUGUGGCACGGUUCAA	Cleavage	seq=cds; coord=2:4834198..4840631:-1; parent_gene=GRMZM2G033219	1
zma-miR171b-3p	gnl|ZmGDB|GRMZM2G033219_T02	3	18.449	1	20	235	254	UUGAGCCGUGCCAAUAUCAC	GUGGUUGUGGCACGGUUCAA	Cleavage	seq=cds; coord=2:4836019..4840631:-1; parent_gene=GRMZM2G033219	1
zma-miR172a	gnl|ZmGDB|GRMZM2G416725_T01	0.5	16.96	1	20	129	148	AGAAUCUUGAUGAUGCUGCA	UGCAGCAUCAUCAGGAUUCU	Cleavage	seq=cds; coord=6:29013673..29014420:1; parent_gene=GRMZM2G416725	1
zma-miR172a	gnl|ZmGDB|GRMZM5G862109_T02	0.5	23.824	1	20	867	886	AGAAUCUUGAUGAUGCUGCA	UGCAGCAUCAUCAGGAUUCU	Cleavage	seq=cds; coord=1:292889740..292893983:1; parent_gene=GRMZM5G862109	1
zma-miR172a	gnl|ZmGDB|GRMZM5G862109_T01	0.5	23.824	1	20	1191	1210	AGAAUCUUGAUGAUGCUGCA	UGCAGCAUCAUCAGGAUUCU	Cleavage	seq=cds; coord=1:292889740..292893983:1; parent_gene=GRMZM5G862109	1
zma-miR172a	gnl|ZmGDB|GRMZM2G700665_T02	0.5	21.238	1	20	1248	1267	AGAAUCUUGAUGAUGCUGCA	UGCAGCAUCAUCAGGAUUCU	Cleavage	seq=cds; coord=8:132044001..132047428:1; parent_gene=GRMZM2G700665	1
zma-miR172a	gnl|ZmGDB|GRMZM2G700665_T03	0.5	21.238	1	20	1293	1312	AGAAUCUUGAUGAUGCUGCA	UGCAGCAUCAUCAGGAUUCU	Cleavage	seq=cds; coord=8:132044001..132047428:1; parent_gene=GRMZM2G700665	1
zma-miR172a	gnl|ZmGDB|GRMZM2G176175_T01	0.5	16.235	1	20	1467	1486	AGAAUCUUGAUGAUGCUGCA	UGCAGCAUCAUCAGGAUUCU	Cleavage	seq=cds; coord=7:22004372..22015553:1; parent_gene=GRMZM2G176175	1
zma-miR172a	gnl|ZmGDB|GRMZM2G176175_T02	0.5	16.235	1	20	1470	1489	AGAAUCUUGAUGAUGCUGCA	UGCAGCAUCAUCAGGAUUCU	Cleavage	seq=cds; coord=7:22004372..22015553:1; parent_gene=GRMZM2G176175	1
zma-miR172a	gnl|ZmGDB|GRMZM2G076602_T01	2.5	16.771	1	20	693	712	AGAAUCUUGAUGAUGCUGCA	UGCAGCAUCAUCACGAUUCC	Cleavage	seq=cds; coord=10:145350317..145352828:1; parent_gene=GRMZM2G076602	1
zma-miR172a	gnl|ZmGDB|GRMZM2G174784_T01	2.5	15.498	1	20	1383	1402	AGAAUCUUGAUGAUGCUGCA	UGCAGCAUCAUCACGAUUCC	Cleavage	seq=cds; coord=2:5514479..5518846:-1; parent_gene=GRMZM2G174784	1
zma-miR172a	gnl|ZmGDB|GRMZM2G423956_T04	2	22.173	1	20	980	999	AGAAUCUUGAUGAUGCUGCA	UGCAGCAUUGUCCAGAUUCU	Cleavage	seq=cds; coord=6:1335084..1338778:1; parent_gene=GRMZM2G423956	1
zma-miR172a	gnl|ZmGDB|GRMZM2G423956_T03	2	22.173	1	20	1487	1506	AGAAUCUUGAUGAUGCUGCA	UGCAGCAUUGUCCAGAUUCU	Cleavage	seq=cds; coord=6:1335084..1338778:1; parent_gene=GRMZM2G423956	1
zma-miR172a	gnl|ZmGDB|GRMZM2G423956_T02	2	22.173	1	20	1487	1506	AGAAUCUUGAUGAUGCUGCA	UGCAGCAUUGUCCAGAUUCU	Cleavage	seq=cds; coord=6:1334626..1338778:1; parent_gene=GRMZM2G423956	1
zma-miR172a	gnl|ZmGDB|GRMZM2G423956_T01	2	22.173	1	20	1487	1506	AGAAUCUUGAUGAUGCUGCA	UGCAGCAUUGUCCAGAUUCU	Cleavage	seq=cds; coord=6:1334626..1338778:1; parent_gene=GRMZM2G423956	1
zma-miR172a	gnl|ZmGDB|GRMZM5G803935_T01	3	21.171	1	20	205	224	AGAAUCUUGAUGAUGCUGCA	AGUGGCAUCAUCAAGAUUCA	Cleavage	seq=cds; coord=3:144884032..144884741:1; parent_gene=GRMZM5G803935	1
zma-miR172a	gnl|ZmGDB|GRMZM2G469304_T01	2.5	23.535	1	20	48	67	AGAAUCUUGAUGAUGCUGCA	UGCAGCACCAUCAGGAUUCA	Cleavage	seq=cds; coord=1:28961031..28964979:-1; parent_gene=GRMZM2G469304	1
zma-miR172d-5p	gnl|ZmGDB|AC213800.3_FGT001	2.5	20.13	1	20	210	229	CAGCACCAUCAAGAUUCACA	UGUGGAUUUUGAUGGUGCAG	Cleavage	seq=cds; coord=6:136284942..136285643:1; parent_gene=AC213800.3_FG001	1
zma-miR172d-3p	gnl|ZmGDB|GRMZM2G416725_T01	0.5	16.96	1	20	129	148	AGAAUCUUGAUGAUGCUGCA	UGCAGCAUCAUCAGGAUUCU	Cleavage	seq=cds; coord=6:29013673..29014420:1; parent_gene=GRMZM2G416725	1
zma-miR172d-3p	gnl|ZmGDB|GRMZM5G862109_T02	0.5	23.824	1	20	867	886	AGAAUCUUGAUGAUGCUGCA	UGCAGCAUCAUCAGGAUUCU	Cleavage	seq=cds; coord=1:292889740..292893983:1; parent_gene=GRMZM5G862109	1
zma-miR172d-3p	gnl|ZmGDB|GRMZM5G862109_T01	0.5	23.824	1	20	1191	1210	AGAAUCUUGAUGAUGCUGCA	UGCAGCAUCAUCAGGAUUCU	Cleavage	seq=cds; coord=1:292889740..292893983:1; parent_gene=GRMZM5G862109	1
zma-miR172d-3p	gnl|ZmGDB|GRMZM2G700665_T02	0.5	21.238	1	20	1248	1267	AGAAUCUUGAUGAUGCUGCA	UGCAGCAUCAUCAGGAUUCU	Cleavage	seq=cds; coord=8:132044001..132047428:1; parent_gene=GRMZM2G700665	1
zma-miR172d-3p	gnl|ZmGDB|GRMZM2G700665_T03	0.5	21.238	1	20	1293	1312	AGAAUCUUGAUGAUGCUGCA	UGCAGCAUCAUCAGGAUUCU	Cleavage	seq=cds; coord=8:132044001..132047428:1; parent_gene=GRMZM2G700665	1
zma-miR172d-3p	gnl|ZmGDB|GRMZM2G176175_T01	0.5	16.235	1	20	1467	1486	AGAAUCUUGAUGAUGCUGCA	UGCAGCAUCAUCAGGAUUCU	Cleavage	seq=cds; coord=7:22004372..22015553:1; parent_gene=GRMZM2G176175	1
zma-miR172d-3p	gnl|ZmGDB|GRMZM2G176175_T02	0.5	16.235	1	20	1470	1489	AGAAUCUUGAUGAUGCUGCA	UGCAGCAUCAUCAGGAUUCU	Cleavage	seq=cds; coord=7:22004372..22015553:1; parent_gene=GRMZM2G176175	1
zma-miR172d-3p	gnl|ZmGDB|GRMZM2G076602_T01	2.5	16.771	1	20	693	712	AGAAUCUUGAUGAUGCUGCA	UGCAGCAUCAUCACGAUUCC	Cleavage	seq=cds; coord=10:145350317..145352828:1; parent_gene=GRMZM2G076602	1
zma-miR172d-3p	gnl|ZmGDB|GRMZM2G174784_T01	2.5	15.498	1	20	1383	1402	AGAAUCUUGAUGAUGCUGCA	UGCAGCAUCAUCACGAUUCC	Cleavage	seq=cds; coord=2:5514479..5518846:-1; parent_gene=GRMZM2G174784	1
zma-miR172d-3p	gnl|ZmGDB|GRMZM2G423956_T04	2	22.173	1	20	980	999	AGAAUCUUGAUGAUGCUGCA	UGCAGCAUUGUCCAGAUUCU	Cleavage	seq=cds; coord=6:1335084..1338778:1; parent_gene=GRMZM2G423956	1
zma-miR172d-3p	gnl|ZmGDB|GRMZM2G423956_T03	2	22.173	1	20	1487	1506	AGAAUCUUGAUGAUGCUGCA	UGCAGCAUUGUCCAGAUUCU	Cleavage	seq=cds; coord=6:1335084..1338778:1; parent_gene=GRMZM2G423956	1
zma-miR172d-3p	gnl|ZmGDB|GRMZM2G423956_T02	2	22.173	1	20	1487	1506	AGAAUCUUGAUGAUGCUGCA	UGCAGCAUUGUCCAGAUUCU	Cleavage	seq=cds; coord=6:1334626..1338778:1; parent_gene=GRMZM2G423956	1
zma-miR172d-3p	gnl|ZmGDB|GRMZM2G423956_T01	2	22.173	1	20	1487	1506	AGAAUCUUGAUGAUGCUGCA	UGCAGCAUUGUCCAGAUUCU	Cleavage	seq=cds; coord=6:1334626..1338778:1; parent_gene=GRMZM2G423956	1
zma-miR172d-3p	gnl|ZmGDB|GRMZM5G803935_T01	3	21.171	1	20	205	224	AGAAUCUUGAUGAUGCUGCA	AGUGGCAUCAUCAAGAUUCA	Cleavage	seq=cds; coord=3:144884032..144884741:1; parent_gene=GRMZM5G803935	1
zma-miR172d-3p	gnl|ZmGDB|GRMZM2G469304_T01	2.5	23.535	1	20	48	67	AGAAUCUUGAUGAUGCUGCA	UGCAGCACCAUCAGGAUUCA	Cleavage	seq=cds; coord=1:28961031..28964979:-1; parent_gene=GRMZM2G469304	1
zma-miR172b-5p	gnl|ZmGDB|AC213800.3_FGT001	2.5	20.13	1	20	210	229	CAGCACCAUCAAGAUUCACA	UGUGGAUUUUGAUGGUGCAG	Cleavage	seq=cds; coord=6:136284942..136285643:1; parent_gene=AC213800.3_FG001	1
zma-miR172b-3p	gnl|ZmGDB|GRMZM2G416725_T01	0.5	16.96	1	20	129	148	AGAAUCUUGAUGAUGCUGCA	UGCAGCAUCAUCAGGAUUCU	Cleavage	seq=cds; coord=6:29013673..29014420:1; parent_gene=GRMZM2G416725	1
zma-miR172b-3p	gnl|ZmGDB|GRMZM5G862109_T02	0.5	23.824	1	20	867	886	AGAAUCUUGAUGAUGCUGCA	UGCAGCAUCAUCAGGAUUCU	Cleavage	seq=cds; coord=1:292889740..292893983:1; parent_gene=GRMZM5G862109	1
zma-miR172b-3p	gnl|ZmGDB|GRMZM5G862109_T01	0.5	23.824	1	20	1191	1210	AGAAUCUUGAUGAUGCUGCA	UGCAGCAUCAUCAGGAUUCU	Cleavage	seq=cds; coord=1:292889740..292893983:1; parent_gene=GRMZM5G862109	1
zma-miR172b-3p	gnl|ZmGDB|GRMZM2G700665_T02	0.5	21.238	1	20	1248	1267	AGAAUCUUGAUGAUGCUGCA	UGCAGCAUCAUCAGGAUUCU	Cleavage	seq=cds; coord=8:132044001..132047428:1; parent_gene=GRMZM2G700665	1
zma-miR172b-3p	gnl|ZmGDB|GRMZM2G700665_T03	0.5	21.238	1	20	1293	1312	AGAAUCUUGAUGAUGCUGCA	UGCAGCAUCAUCAGGAUUCU	Cleavage	seq=cds; coord=8:132044001..132047428:1; parent_gene=GRMZM2G700665	1
zma-miR172b-3p	gnl|ZmGDB|GRMZM2G176175_T01	0.5	16.235	1	20	1467	1486	AGAAUCUUGAUGAUGCUGCA	UGCAGCAUCAUCAGGAUUCU	Cleavage	seq=cds; coord=7:22004372..22015553:1; parent_gene=GRMZM2G176175	1
zma-miR172b-3p	gnl|ZmGDB|GRMZM2G176175_T02	0.5	16.235	1	20	1470	1489	AGAAUCUUGAUGAUGCUGCA	UGCAGCAUCAUCAGGAUUCU	Cleavage	seq=cds; coord=7:22004372..22015553:1; parent_gene=GRMZM2G176175	1
zma-miR172b-3p	gnl|ZmGDB|GRMZM2G076602_T01	2.5	16.771	1	20	693	712	AGAAUCUUGAUGAUGCUGCA	UGCAGCAUCAUCACGAUUCC	Cleavage	seq=cds; coord=10:145350317..145352828:1; parent_gene=GRMZM2G076602	1
zma-miR172b-3p	gnl|ZmGDB|GRMZM2G174784_T01	2.5	15.498	1	20	1383	1402	AGAAUCUUGAUGAUGCUGCA	UGCAGCAUCAUCACGAUUCC	Cleavage	seq=cds; coord=2:5514479..5518846:-1; parent_gene=GRMZM2G174784	1
zma-miR172b-3p	gnl|ZmGDB|GRMZM2G423956_T04	2	22.173	1	20	980	999	AGAAUCUUGAUGAUGCUGCA	UGCAGCAUUGUCCAGAUUCU	Cleavage	seq=cds; coord=6:1335084..1338778:1; parent_gene=GRMZM2G423956	1
zma-miR172b-3p	gnl|ZmGDB|GRMZM2G423956_T03	2	22.173	1	20	1487	1506	AGAAUCUUGAUGAUGCUGCA	UGCAGCAUUGUCCAGAUUCU	Cleavage	seq=cds; coord=6:1335084..1338778:1; parent_gene=GRMZM2G423956	1
zma-miR172b-3p	gnl|ZmGDB|GRMZM2G423956_T02	2	22.173	1	20	1487	1506	AGAAUCUUGAUGAUGCUGCA	UGCAGCAUUGUCCAGAUUCU	Cleavage	seq=cds; coord=6:1334626..1338778:1; parent_gene=GRMZM2G423956	1
zma-miR172b-3p	gnl|ZmGDB|GRMZM2G423956_T01	2	22.173	1	20	1487	1506	AGAAUCUUGAUGAUGCUGCA	UGCAGCAUUGUCCAGAUUCU	Cleavage	seq=cds; coord=6:1334626..1338778:1; parent_gene=GRMZM2G423956	1
zma-miR172b-3p	gnl|ZmGDB|GRMZM5G803935_T01	3	21.171	1	20	205	224	AGAAUCUUGAUGAUGCUGCA	AGUGGCAUCAUCAAGAUUCA	Cleavage	seq=cds; coord=3:144884032..144884741:1; parent_gene=GRMZM5G803935	1
zma-miR172b-3p	gnl|ZmGDB|GRMZM2G469304_T01	2.5	23.535	1	20	48	67	AGAAUCUUGAUGAUGCUGCA	UGCAGCACCAUCAGGAUUCA	Cleavage	seq=cds; coord=1:28961031..28964979:-1; parent_gene=GRMZM2G469304	1
zma-miR172c-5p	gnl|ZmGDB|GRMZM2G007721_T02	3	23.939	1	20	558	577	CAGCACCACCAAGAUUCACA	GGUGCAUCAUGGUGGUGCUG	Cleavage	seq=cds; coord=10:98699874..98715865:1; parent_gene=GRMZM2G007721	1
zma-miR172c-5p	gnl|ZmGDB|GRMZM2G007721_T01	3	23.939	1	20	1125	1144	CAGCACCACCAAGAUUCACA	GGUGCAUCAUGGUGGUGCUG	Cleavage	seq=cds; coord=10:98697827..98715875:1; parent_gene=GRMZM2G007721	1
zma-miR172c-5p	gnl|ZmGDB|AC197581.3_FGT002	3	22.23	1	20	60	79	CAGCACCACCAAGAUUCACA	UUUGGGUCUUGGAGGUGCUG	Cleavage	seq=cds; coord=6:122242739..122244096:1; parent_gene=AC197581.3_FG002	1
zma-miR172c-5p	gnl|ZmGDB|GRMZM2G477483_T01	3	21.766	1	20	150	169	CAGCACCACCAAGAUUCACA	UUUGGGUCUUGGAGGUGCUG	Cleavage	seq=cds; coord=9:97532702..97534001:-1; parent_gene=GRMZM2G477483	1
zma-miR172c-3p	gnl|ZmGDB|GRMZM2G416725_T01	0.5	16.96	1	20	129	148	AGAAUCUUGAUGAUGCUGCA	UGCAGCAUCAUCAGGAUUCU	Cleavage	seq=cds; coord=6:29013673..29014420:1; parent_gene=GRMZM2G416725	1
zma-miR172c-3p	gnl|ZmGDB|GRMZM5G862109_T02	0.5	23.824	1	20	867	886	AGAAUCUUGAUGAUGCUGCA	UGCAGCAUCAUCAGGAUUCU	Cleavage	seq=cds; coord=1:292889740..292893983:1; parent_gene=GRMZM5G862109	1
zma-miR172c-3p	gnl|ZmGDB|GRMZM5G862109_T01	0.5	23.824	1	20	1191	1210	AGAAUCUUGAUGAUGCUGCA	UGCAGCAUCAUCAGGAUUCU	Cleavage	seq=cds; coord=1:292889740..292893983:1; parent_gene=GRMZM5G862109	1
zma-miR172c-3p	gnl|ZmGDB|GRMZM2G700665_T02	0.5	21.238	1	20	1248	1267	AGAAUCUUGAUGAUGCUGCA	UGCAGCAUCAUCAGGAUUCU	Cleavage	seq=cds; coord=8:132044001..132047428:1; parent_gene=GRMZM2G700665	1
zma-miR172c-3p	gnl|ZmGDB|GRMZM2G700665_T03	0.5	21.238	1	20	1293	1312	AGAAUCUUGAUGAUGCUGCA	UGCAGCAUCAUCAGGAUUCU	Cleavage	seq=cds; coord=8:132044001..132047428:1; parent_gene=GRMZM2G700665	1
zma-miR172c-3p	gnl|ZmGDB|GRMZM2G176175_T01	0.5	16.235	1	20	1467	1486	AGAAUCUUGAUGAUGCUGCA	UGCAGCAUCAUCAGGAUUCU	Cleavage	seq=cds; coord=7:22004372..22015553:1; parent_gene=GRMZM2G176175	1
zma-miR172c-3p	gnl|ZmGDB|GRMZM2G176175_T02	0.5	16.235	1	20	1470	1489	AGAAUCUUGAUGAUGCUGCA	UGCAGCAUCAUCAGGAUUCU	Cleavage	seq=cds; coord=7:22004372..22015553:1; parent_gene=GRMZM2G176175	1
zma-miR172c-3p	gnl|ZmGDB|GRMZM2G076602_T01	2.5	16.771	1	20	693	712	AGAAUCUUGAUGAUGCUGCA	UGCAGCAUCAUCACGAUUCC	Cleavage	seq=cds; coord=10:145350317..145352828:1; parent_gene=GRMZM2G076602	1
zma-miR172c-3p	gnl|ZmGDB|GRMZM2G174784_T01	2.5	15.498	1	20	1383	1402	AGAAUCUUGAUGAUGCUGCA	UGCAGCAUCAUCACGAUUCC	Cleavage	seq=cds; coord=2:5514479..5518846:-1; parent_gene=GRMZM2G174784	1
zma-miR172c-3p	gnl|ZmGDB|GRMZM2G423956_T04	2	22.173	1	20	980	999	AGAAUCUUGAUGAUGCUGCA	UGCAGCAUUGUCCAGAUUCU	Cleavage	seq=cds; coord=6:1335084..1338778:1; parent_gene=GRMZM2G423956	1
zma-miR172c-3p	gnl|ZmGDB|GRMZM2G423956_T03	2	22.173	1	20	1487	1506	AGAAUCUUGAUGAUGCUGCA	UGCAGCAUUGUCCAGAUUCU	Cleavage	seq=cds; coord=6:1335084..1338778:1; parent_gene=GRMZM2G423956	1
zma-miR172c-3p	gnl|ZmGDB|GRMZM2G423956_T02	2	22.173	1	20	1487	1506	AGAAUCUUGAUGAUGCUGCA	UGCAGCAUUGUCCAGAUUCU	Cleavage	seq=cds; coord=6:1334626..1338778:1; parent_gene=GRMZM2G423956	1
zma-miR172c-3p	gnl|ZmGDB|GRMZM2G423956_T01	2	22.173	1	20	1487	1506	AGAAUCUUGAUGAUGCUGCA	UGCAGCAUUGUCCAGAUUCU	Cleavage	seq=cds; coord=6:1334626..1338778:1; parent_gene=GRMZM2G423956	1
zma-miR172c-3p	gnl|ZmGDB|GRMZM5G803935_T01	3	21.171	1	20	205	224	AGAAUCUUGAUGAUGCUGCA	AGUGGCAUCAUCAAGAUUCA	Cleavage	seq=cds; coord=3:144884032..144884741:1; parent_gene=GRMZM5G803935	1
zma-miR172c-3p	gnl|ZmGDB|GRMZM2G469304_T01	2.5	23.535	1	20	48	67	AGAAUCUUGAUGAUGCUGCA	UGCAGCACCAUCAGGAUUCA	Cleavage	seq=cds; coord=1:28961031..28964979:-1; parent_gene=GRMZM2G469304	1
zma-miR171d-5p	gnl|ZmGDB|GRMZM2G148518_T02	2.5	16.35	1	20	1103	1122	UGUUGGCUCGGCUCACUCAG	CUGAGGGAGCCGAACCAACA	Cleavage	seq=cds; coord=10:143483468..143486964:-1; parent_gene=GRMZM2G148518	1
zma-miR171d-5p	gnl|ZmGDB|GRMZM2G148518_T01	2.5	16.35	1	20	1103	1122	UGUUGGCUCGGCUCACUCAG	CUGAGGGAGCCGAACCAACA	Cleavage	seq=cds; coord=10:143483122..143486983:-1; parent_gene=GRMZM2G148518	1
zma-miR171d-5p	gnl|ZmGDB|AC199480.3_FGT005	3	14.372	1	20	150	169	UGUUGGCUCGGCUCACUCAG	CUGGGAGAGCCGAGCCACCA	Cleavage	seq=cds; coord=3:219197776..219198288:1; parent_gene=AC199480.3_FG005	1
zma-miR171d-5p	gnl|ZmGDB|GRMZM5G821411_T01	3	13.146	1	20	362	381	UGUUGGCUCGGCUCACUCAG	CUGAGUUUGCUGAGUCAACA	Cleavage	seq=cds; coord=5:206027378..206028144:1; parent_gene=GRMZM5G821411	1
zma-miR171d-5p	gnl|ZmGDB|GRMZM2G001421_T03	3	24.498	1	20	1326	1345	UGUUGGCUCGGCUCACUCAG	CUGCGUCGGCCGGGCCAACA	Cleavage	seq=cds; coord=8:26345052..26350246:1; parent_gene=GRMZM2G001421	1
zma-miR171d-5p	gnl|ZmGDB|GRMZM2G001421_T02	3	24.498	1	20	1692	1711	UGUUGGCUCGGCUCACUCAG	CUGCGUCGGCCGGGCCAACA	Cleavage	seq=cds; coord=8:26345052..26350246:1; parent_gene=GRMZM2G001421	1
zma-miR171d-5p	gnl|ZmGDB|GRMZM2G001421_T01	3	24.498	1	20	1692	1711	UGUUGGCUCGGCUCACUCAG	CUGCGUCGGCCGGGCCAACA	Cleavage	seq=cds; coord=8:26345052..26350246:1; parent_gene=GRMZM2G001421	1
zma-miR171d-5p	gnl|ZmGDB|GRMZM2G001421_T04	3	24.498	1	20	1833	1852	UGUUGGCUCGGCUCACUCAG	CUGCGUCGGCCGGGCCAACA	Cleavage	seq=cds; coord=8:26345438..26350246:1; parent_gene=GRMZM2G001421	1
zma-miR171d-3p	gnl|ZmGDB|GRMZM2G317338_T01	0.5	23.512	1	21	252	272	UGAUUGAGCCGUGCCAAUAUC	GAUAUUGGCGCGGCUCAAUCA	Cleavage	seq=cds; coord=6:2909967..2910502:1; parent_gene=GRMZM2G317338	1
zma-miR171d-3p	gnl|ZmGDB|GRMZM2G098800_T01	0.5	23.516	1	21	420	440	UGAUUGAGCCGUGCCAAUAUC	GAUAUUGGCGCGGCUCAAUCA	Cleavage	seq=cds; coord=4:153196436..153199541:1; parent_gene=GRMZM2G098800	1
zma-miR171d-3p	gnl|ZmGDB|GRMZM2G098800_T02	0.5	23.516	1	21	1107	1127	UGAUUGAGCCGUGCCAAUAUC	GAUAUUGGCGCGGCUCAAUCA	Cleavage	seq=cds; coord=4:153196404..153199186:1; parent_gene=GRMZM2G098800	1
zma-miR171d-3p	gnl|ZmGDB|AC187788.3_FGT008	1	22.707	1	21	144	164	UGAUUGAGCCGUGCCAAUAUC	GAUAUUGGCGCGGCUCAAUUA	Cleavage	seq=cds; coord=7:165554811..165555298:-1; parent_gene=AC187788.3_FG008	1
zma-miR171d-3p	gnl|ZmGDB|GRMZM2G477666_T01	2	20.615	1	21	219	239	UGAUUGAGCCGUGCCAAUAUC	GAUAUUGGCGCAGCUCAAUUA	Translation	seq=cds; coord=9:143369964..143371910:-1; parent_gene=GRMZM2G477666	1
zma-miR171f-5p	gnl|ZmGDB|GRMZM2G063628_T01	3	20.14	1	21	75	95	CGAUGUUGGCAUGGCUCAAUC	GGUUGCGCCGUACCAACAUCG	Translation	seq=cds; coord=6:143069193..143069707:-1; parent_gene=GRMZM2G063628	1
zma-miR171f-3p	gnl|ZmGDB|GRMZM2G317338_T01	1.5	22.308	1	20	250	269	UUGAGCCGUGCCAAUAUCAC	GCGAUAUUGGCGCGGCUCAA	Cleavage	seq=cds; coord=6:2909967..2910502:1; parent_gene=GRMZM2G317338	1
zma-miR171f-3p	gnl|ZmGDB|AC187788.3_FGT008	1.5	24.175	1	20	142	161	UUGAGCCGUGCCAAUAUCAC	GAGAUAUUGGCGCGGCUCAA	Cleavage	seq=cds; coord=7:165554811..165555298:-1; parent_gene=AC187788.3_FG008	1
zma-miR171f-3p	gnl|ZmGDB|GRMZM2G011947_T01	1.5	24.467	1	20	166	185	UUGAGCCGUGCCAAUAUCAC	GAGAUAUUGGCGCGGCUCAA	Cleavage	seq=cds; coord=6:55396619..55397567:1; parent_gene=GRMZM2G011947	1
zma-miR171f-3p	gnl|ZmGDB|GRMZM2G098800_T01	1.5	23.315	1	20	418	437	UUGAGCCGUGCCAAUAUCAC	GAGAUAUUGGCGCGGCUCAA	Cleavage	seq=cds; coord=4:153196436..153199541:1; parent_gene=GRMZM2G098800	1
zma-miR171f-3p	gnl|ZmGDB|GRMZM2G110579_T01	1.5	23.999	1	20	769	788	UUGAGCCGUGCCAAUAUCAC	GCGAUAUUGGCGCGGCUCAA	Cleavage	seq=cds; coord=5:192846362..192849106:1; parent_gene=GRMZM2G110579	1
zma-miR171f-3p	gnl|ZmGDB|GRMZM2G098800_T02	1.5	23.315	1	20	1105	1124	UUGAGCCGUGCCAAUAUCAC	GAGAUAUUGGCGCGGCUCAA	Cleavage	seq=cds; coord=4:153196404..153199186:1; parent_gene=GRMZM2G098800	1
zma-miR171f-3p	gnl|ZmGDB|GRMZM2G021471_T01	2.5	15.348	1	21	364	384	UUGAGCCGUGCCAAUAUCACA	UGUGAAAAUGGCAUGGCUCAA	Cleavage	seq=cds; coord=3:134018680..134023296:-1; parent_gene=GRMZM2G021471	1
zma-miR171f-3p	gnl|ZmGDB|GRMZM2G383154_T01	2.5	19.608	1	21	666	685	UUGAGCCGUGCCAAUAUCACA	UGUGAUAUUGGCA-GGUUCAA	Cleavage	seq=cds; coord=3:66728190..66731876:-1; parent_gene=GRMZM2G383154	1
zma-miR171f-3p	gnl|ZmGDB|GRMZM2G477666_T01	3	23.164	1	20	217	236	UUGAGCCGUGCCAAUAUCAC	GAGAUAUUGGCGCAGCUCAA	Cleavage	seq=cds; coord=9:143369964..143371910:-1; parent_gene=GRMZM2G477666	1
zma-miR171f-3p	gnl|ZmGDB|GRMZM2G143480_T04	3	21.516	1	20	235	254	UUGAGCCGUGCCAAUAUCAC	GUGGUUGUGGCACGGUUCAA	Cleavage	seq=cds; coord=10:145895459..145900491:1; parent_gene=GRMZM2G143480	1
zma-miR171f-3p	gnl|ZmGDB|GRMZM2G143480_T01	3	21.516	1	20	229	248	UUGAGCCGUGCCAAUAUCAC	GUGGUUGUGGCACGGUUCAA	Cleavage	seq=cds; coord=10:145895417..145903773:1; parent_gene=GRMZM2G143480	1
zma-miR171f-3p	gnl|ZmGDB|GRMZM2G143480_T03	3	21.516	1	20	229	248	UUGAGCCGUGCCAAUAUCAC	GUGGUUGUGGCACGGUUCAA	Cleavage	seq=cds; coord=10:145895459..145900494:1; parent_gene=GRMZM2G143480	1
zma-miR394a-5p	gnl|ZmGDB|GRMZM2G064954_T01	0	23.112	1	20	1083	1102	UUGGCAUUCUGUCCACCUCC	GGAGGUGGACAGAAUGCCAA	Cleavage	seq=cds; coord=8:161103602..161107787:1; parent_gene=GRMZM2G064954	1
zma-miR394a-5p	gnl|ZmGDB|GRMZM2G119650_T01	0	22.966	1	20	1083	1102	UUGGCAUUCUGUCCACCUCC	GGAGGUGGACAGAAUGCCAA	Cleavage	seq=cds; coord=3:158566844..158570457:-1; parent_gene=GRMZM2G119650	1
zma-miR394a-5p	gnl|ZmGDB|GRMZM2G087649_T01	3	24.197	1	20	460	479	UUGGCAUUCUGUCCACCUCC	UGGGGUGAACAGGAUGCCAA	Cleavage	seq=cds; coord=5:140756805..140759709:1; parent_gene=GRMZM2G087649	1
zma-miR394a-5p	gnl|ZmGDB|GRMZM2G409020_T01	3	18.228	1	20	287	306	UUGGCAUUCUGUCCACCUCC	GGAAGUGGAUAGAAUGCCUA	Cleavage	seq=cds; coord=4:173014770..173022544:-1; parent_gene=GRMZM2G409020	1
zma-miR394a-5p	gnl|ZmGDB|GRMZM5G870829_T01	3	23.988	1	20	132	151	UUGGCAUUCUGUCCACCUCC	GGAGGUCGACUGGAUGCCAG	Translation	seq=cds; coord=1:285316058..285316683:1; parent_gene=GRMZM5G870829	1
zma-miR394a-5p	gnl|ZmGDB|AC196059.3_FGT018	3	13.982	1	20	93	112	UUGGCAUUCUGUCCACCUCC	GGAGGUGGUGAGGGUGCCAA	Translation	seq=cds; coord=9:150799290..150799679:-1; parent_gene=AC196059.3_FG018	1
zma-miR394a-3p	gnl|ZmGDB|GRMZM2G096343_T01	3	17.804	1	20	968	987	AGGUGGGCAUACUGCCAAUG	CAUUGGCAGUUUGUCCGUUU	Translation	seq=cds; coord=4:170007004..170017001:-1; parent_gene=GRMZM2G096343	1
zma-miR394a-3p	gnl|ZmGDB|GRMZM2G420774_T01	3	19.37	1	20	410	429	AGGUGGGCAUACUGCCAAUG	CAUUGGAAGAAUGCCUACUU	Translation	seq=cds; coord=10:65657276..65659663:-1; parent_gene=GRMZM2G420774	1
zma-miR394b-5p	gnl|ZmGDB|GRMZM2G064954_T01	0	23.112	1	20	1083	1102	UUGGCAUUCUGUCCACCUCC	GGAGGUGGACAGAAUGCCAA	Cleavage	seq=cds; coord=8:161103602..161107787:1; parent_gene=GRMZM2G064954	1
zma-miR394b-5p	gnl|ZmGDB|GRMZM2G119650_T01	0	22.966	1	20	1083	1102	UUGGCAUUCUGUCCACCUCC	GGAGGUGGACAGAAUGCCAA	Cleavage	seq=cds; coord=3:158566844..158570457:-1; parent_gene=GRMZM2G119650	1
zma-miR394b-5p	gnl|ZmGDB|GRMZM2G087649_T01	3	24.197	1	20	460	479	UUGGCAUUCUGUCCACCUCC	UGGGGUGAACAGGAUGCCAA	Cleavage	seq=cds; coord=5:140756805..140759709:1; parent_gene=GRMZM2G087649	1
zma-miR394b-5p	gnl|ZmGDB|GRMZM2G409020_T01	3	18.228	1	20	287	306	UUGGCAUUCUGUCCACCUCC	GGAAGUGGAUAGAAUGCCUA	Cleavage	seq=cds; coord=4:173014770..173022544:-1; parent_gene=GRMZM2G409020	1
zma-miR394b-5p	gnl|ZmGDB|GRMZM5G870829_T01	3	23.988	1	20	132	151	UUGGCAUUCUGUCCACCUCC	GGAGGUCGACUGGAUGCCAG	Translation	seq=cds; coord=1:285316058..285316683:1; parent_gene=GRMZM5G870829	1
zma-miR394b-5p	gnl|ZmGDB|AC196059.3_FGT018	3	13.982	1	20	93	112	UUGGCAUUCUGUCCACCUCC	GGAGGUGGUGAGGGUGCCAA	Translation	seq=cds; coord=9:150799290..150799679:-1; parent_gene=AC196059.3_FG018	1
zma-miR394b-3p	gnl|ZmGDB|GRMZM2G096343_T01	3	17.804	1	20	968	987	AGGUGGGCAUACUGCCAAUG	CAUUGGCAGUUUGUCCGUUU	Translation	seq=cds; coord=4:170007004..170017001:-1; parent_gene=GRMZM2G096343	1
zma-miR394b-3p	gnl|ZmGDB|GRMZM2G420774_T01	3	19.37	1	20	410	429	AGGUGGGCAUACUGCCAAUG	CAUUGGAAGAAUGCCUACUU	Translation	seq=cds; coord=10:65657276..65659663:-1; parent_gene=GRMZM2G420774	1
zma-miR395b-5p	gnl|ZmGDB|GRMZM2G420988_T01	2	14.876	1	20	245	264	GUUCCCUACAAGCACUUCAC	GUGAAGUGUUUGGAGGGAAU	Cleavage	seq=cds; coord=9:43679893..43682735:-1; parent_gene=GRMZM2G420988	1
zma-miR395b-5p	gnl|ZmGDB|GRMZM2G136366_T01	2.5	19.693	1	19	1599	1618	GUUCCCUA-CAAGCACUUCA	UGAAGUGCUUGGUAGGGGAC	Translation	seq=cds; coord=1:182283135..182290570:1; parent_gene=GRMZM2G136366	1
zma-miR395b-3p	gnl|ZmGDB|GRMZM2G149952_T01	1	21.484	1	21	391	411	GUGAAGUGUUUGGGGGAACUC	GAGUUCCUCCAAACACUUCAU	Cleavage	seq=cds; coord=1:275090703..275094517:-1; parent_gene=GRMZM2G149952	1
zma-miR395b-3p	gnl|ZmGDB|GRMZM2G051270_T01	1.5	22.338	1	21	397	417	GUGAAGUGUUUGGGGGAACUC	GAGUUCCUCCAAGCACUUCAU	Cleavage	seq=cds; coord=5:7702248..7706223:1; parent_gene=GRMZM2G051270	1
zma-miR395b-3p	gnl|ZmGDB|GRMZM2G051270_T03	1.5	22.338	1	21	397	417	GUGAAGUGUUUGGGGGAACUC	GAGUUCCUCCAAGCACUUCAU	Cleavage	seq=cds; coord=5:7702336..7706201:1; parent_gene=GRMZM2G051270	1
zma-miR395b-3p	gnl|ZmGDB|GRMZM2G051270_T02	1.5	19.86	1	21	13	33	GUGAAGUGUUUGGGGGAACUC	GAGUUCCUCCAAGCACUUCAU	Cleavage	seq=cds; coord=5:7702370..7706207:1; parent_gene=GRMZM2G051270	1
zma-miR395b-3p	gnl|ZmGDB|GRMZM2G134044_T01	3	21.943	1	20	606	625	GUGAAGUGUUUGGGGGAACU	GGUUUCCCCAAAUGCUUCGU	Cleavage	seq=cds; coord=10:102234290..102238464:-1; parent_gene=GRMZM2G134044	1
zma-miR395b-3p	gnl|ZmGDB|GRMZM2G134044_T02	3	21.943	1	20	606	625	GUGAAGUGUUUGGGGGAACU	GGUUUCCCCAAAUGCUUCGU	Cleavage	seq=cds; coord=10:102234290..102238464:-1; parent_gene=GRMZM2G134044	1
zma-miR395b-3p	gnl|ZmGDB|GRMZM2G134044_T03	3	21.943	1	20	606	625	GUGAAGUGUUUGGGGGAACU	GGUUUCCCCAAAUGCUUCGU	Cleavage	seq=cds; coord=10:102234290..102238413:-1; parent_gene=GRMZM2G134044	1
zma-miR395c-5p	gnl|ZmGDB|GRMZM2G420988_T01	1.5	14.876	1	20	245	264	GUUCCCUGCAAACACUUCAC	GUGAAGUGUUUGGAGGGAAU	Cleavage	seq=cds; coord=9:43679893..43682735:-1; parent_gene=GRMZM2G420988	1
zma-miR395c-5p	gnl|ZmGDB|GRMZM2G476841_T01	3	24.681	1	21	19	39	GUUCCCUGCAAACACUUCACC	GGUGAAGCGGAUGCAGGGAAC	Translation	seq=cds; coord=1:159207070..159208956:-1; parent_gene=GRMZM2G476841	1
zma-miR395c-3p	gnl|ZmGDB|GRMZM2G149952_T01	0.5	21.484	1	21	391	411	GUGAAGUGUUUGGAGGAACUC	GAGUUCCUCCAAACACUUCAU	Cleavage	seq=cds; coord=1:275090703..275094517:-1; parent_gene=GRMZM2G149952	1
zma-miR395c-3p	gnl|ZmGDB|GRMZM2G051270_T01	1	22.338	1	21	397	417	GUGAAGUGUUUGGAGGAACUC	GAGUUCCUCCAAGCACUUCAU	Cleavage	seq=cds; coord=5:7702248..7706223:1; parent_gene=GRMZM2G051270	1
zma-miR395c-3p	gnl|ZmGDB|GRMZM2G051270_T03	1	22.338	1	21	397	417	GUGAAGUGUUUGGAGGAACUC	GAGUUCCUCCAAGCACUUCAU	Cleavage	seq=cds; coord=5:7702336..7706201:1; parent_gene=GRMZM2G051270	1
zma-miR395c-3p	gnl|ZmGDB|GRMZM2G051270_T02	1	19.86	1	21	13	33	GUGAAGUGUUUGGAGGAACUC	GAGUUCCUCCAAGCACUUCAU	Cleavage	seq=cds; coord=5:7702370..7706207:1; parent_gene=GRMZM2G051270	1
zma-miR395c-3p	gnl|ZmGDB|GRMZM2G048276_T01	3	11.112	1	20	2265	2284	GUGAAGUGUUUGGAGGAACU	AGUUUCUUCAGAUGCUUCAU	Cleavage	seq=cds; coord=1:210219079..210224111:1; parent_gene=GRMZM2G048276	1
zma-miR395c-3p	gnl|ZmGDB|GRMZM2G049288_T01	3	23.411	1	20	918	937	GUGAAGUGUUUGGAGGAACU	UGUUCUUACAAGCACUUCAC	Cleavage	seq=cds; coord=9:111981488..112003339:1; parent_gene=GRMZM2G049288	1
zma-miR395c-3p	gnl|ZmGDB|GRMZM2G024887_T01	3	24.61	1	21	213	233	GUGAAGUGUUUGGAGGAACUC	GAGCUUCUCCAAGAACUUCAC	Cleavage	seq=cds; coord=10:132702049..132703602:-1; parent_gene=GRMZM2G024887	1
zma-miR395c-3p	gnl|ZmGDB|GRMZM2G153268_T01	3	22.996	1	21	210	230	GUGAAGUGUUUGGAGGAACUC	GAGCUUCUCCAAGAACUUCAC	Cleavage	seq=cds; coord=2:23133999..23135553:1; parent_gene=GRMZM2G153268	1
zma-miR395a-5p	gnl|ZmGDB|GRMZM2G077180_T01	2.5	22.796	1	22	675	696	GUUCUCCUCAAACCACUUCAGU	GCUGGAGUGGUUCGUGGAGAAC	Translation	seq=cds; coord=5:56833666..56838382:-1; parent_gene=GRMZM2G077180	1
zma-miR395a-5p	gnl|ZmGDB|GRMZM2G098227_T01	3	21.351	1	22	1239	1260	GUUCUCCUCAAACCACUUCAGU	AUUGAAGAGGUUAGAGGAGAAG	Translation	seq=cds; coord=8:108034632..108055193:-1; parent_gene=GRMZM2G098227	1
zma-miR395a-5p	gnl|ZmGDB|GRMZM2G098227_T02	3	21.351	1	22	1284	1305	GUUCUCCUCAAACCACUUCAGU	AUUGAAGAGGUUAGAGGAGAAG	Translation	seq=cds; coord=8:108034632..108055193:-1; parent_gene=GRMZM2G098227	1
zma-miR395a-5p	gnl|ZmGDB|AC194447.3_FGT002	3	21.402	1	23	144	165	GUUCUCCUCAAACCACUUCAGUU	AGUUGAAGUGGUA-GAGGAGAAC	Translation	seq=cds; coord=2:181902256..181903950:1; parent_gene=AC194447.3_FG002	1
zma-miR395a-5p	gnl|ZmGDB|GRMZM2G175089_T04	3	18.565	1	20	521	540	GUUCUCCUCAAACCACUUCA	UGAAGAGUUUUGAGGAGAAA	Cleavage	seq=cds; coord=6:162112265..162114272:-1; parent_gene=GRMZM2G175089	1
zma-miR395a-3p	gnl|ZmGDB|GRMZM2G149952_T01	1	21.484	1	21	391	411	GUGAAGUGUUUGGGGGAACUC	GAGUUCCUCCAAACACUUCAU	Cleavage	seq=cds; coord=1:275090703..275094517:-1; parent_gene=GRMZM2G149952	1
zma-miR395a-3p	gnl|ZmGDB|GRMZM2G051270_T01	1.5	22.338	1	21	397	417	GUGAAGUGUUUGGGGGAACUC	GAGUUCCUCCAAGCACUUCAU	Cleavage	seq=cds; coord=5:7702248..7706223:1; parent_gene=GRMZM2G051270	1
zma-miR395a-3p	gnl|ZmGDB|GRMZM2G051270_T03	1.5	22.338	1	21	397	417	GUGAAGUGUUUGGGGGAACUC	GAGUUCCUCCAAGCACUUCAU	Cleavage	seq=cds; coord=5:7702336..7706201:1; parent_gene=GRMZM2G051270	1
zma-miR395a-3p	gnl|ZmGDB|GRMZM2G051270_T02	1.5	19.86	1	21	13	33	GUGAAGUGUUUGGGGGAACUC	GAGUUCCUCCAAGCACUUCAU	Cleavage	seq=cds; coord=5:7702370..7706207:1; parent_gene=GRMZM2G051270	1
zma-miR395a-3p	gnl|ZmGDB|GRMZM2G134044_T01	3	21.943	1	20	606	625	GUGAAGUGUUUGGGGGAACU	GGUUUCCCCAAAUGCUUCGU	Cleavage	seq=cds; coord=10:102234290..102238464:-1; parent_gene=GRMZM2G134044	1
zma-miR395a-3p	gnl|ZmGDB|GRMZM2G134044_T02	3	21.943	1	20	606	625	GUGAAGUGUUUGGGGGAACU	GGUUUCCCCAAAUGCUUCGU	Cleavage	seq=cds; coord=10:102234290..102238464:-1; parent_gene=GRMZM2G134044	1
zma-miR395a-3p	gnl|ZmGDB|GRMZM2G134044_T03	3	21.943	1	20	606	625	GUGAAGUGUUUGGGGGAACU	GGUUUCCCCAAAUGCUUCGU	Cleavage	seq=cds; coord=10:102234290..102238413:-1; parent_gene=GRMZM2G134044	1
zma-miR396b-5p	gnl|ZmGDB|GRMZM2G087671_T01	3	21.968	1	20	737	756	UUCCACAGCUUUCUUGAACU	AGUUUAAGAAAGCUGUCGAU	Cleavage	seq=cds; coord=6:135779127..135782735:1; parent_gene=GRMZM2G087671	1
zma-miR396b-5p	gnl|ZmGDB|GRMZM2G008283_T01	2.5	17.991	1	21	157	177	UUCCACAGCUUUCUUGAACUG	UACUUCAAGACAGUUGUGGAA	Translation	seq=cds; coord=3:8587471..8592158:-1; parent_gene=GRMZM2G008283	1
zma-miR396b-5p	gnl|ZmGDB|GRMZM2G008283_T02	2.5	17.991	1	21	187	207	UUCCACAGCUUUCUUGAACUG	UACUUCAAGACAGUUGUGGAA	Translation	seq=cds; coord=3:8587471..8592158:-1; parent_gene=GRMZM2G008283	1
zma-miR396b-5p	gnl|ZmGDB|GRMZM2G152526_T01	3	20.585	1	20	371	390	UUCCACAGCUUUCUUGAACU	AGUUUGGGAAGGUUGUGGAG	Cleavage	seq=cds; coord=1:143622295..143626633:1; parent_gene=GRMZM2G152526	1
zma-miR396b-5p	gnl|ZmGDB|GRMZM2G156656_T01	3	21.789	1	20	806	825	UUCCACAGCUUUCUUGAACU	AGUUUAAGAAGGUUGUAGAA	Cleavage	seq=cds; coord=1:295470099..295474847:1; parent_gene=GRMZM2G156656	1
zma-miR396b-5p	gnl|ZmGDB|GRMZM2G099862_T04	2	24.834	1	21	318	339	UUCCACA-GCUUUCUUGAACUG	CCGUUCAAGAAAGCAUGUGGAA	Cleavage	seq=cds; coord=2:225159573..225162090:-1; parent_gene=GRMZM2G099862	1
zma-miR396b-5p	gnl|ZmGDB|GRMZM2G178983_T01	3	19.805	1	20	136	155	UUCCACAGCUUUCUUGAACU	AGGUCAAGAAAGCCGUGGGA	Cleavage	seq=cds; coord=4:173299838..173300267:-1; parent_gene=GRMZM2G178983	1
zma-miR396b-5p	gnl|ZmGDB|GRMZM2G119359_T01	2	17.432	1	21	18	39	UUCCACA-GCUUUCUUGAACUG	CCGUUCAAGAAAGCCUGUGGAA	Cleavage	seq=cds; coord=9:25709471..25712485:1; parent_gene=GRMZM2G119359	1
zma-miR396b-5p	gnl|ZmGDB|GRMZM2G129147_T02	2	22.507	1	21	18	39	UUCCACA-GCUUUCUUGAACUG	CCGUUCAAGAAAGCCUGUGGAA	Cleavage	seq=cds; coord=10:140968794..140971765:-1; parent_gene=GRMZM2G129147	1
zma-miR396b-5p	gnl|ZmGDB|GRMZM2G098594_T03	2	15.604	1	21	18	39	UUCCACA-GCUUUCUUGAACUG	CCGUUCAAGAAAGCCUGUGGAA	Cleavage	seq=cds; coord=6:60193365..60196491:-1; parent_gene=GRMZM2G098594	1
zma-miR396b-5p	gnl|ZmGDB|GRMZM2G098594_T04	2	15.604	1	21	18	39	UUCCACA-GCUUUCUUGAACUG	CCGUUCAAGAAAGCCUGUGGAA	Cleavage	seq=cds; coord=6:60193371..60196425:-1; parent_gene=GRMZM2G098594	1
zma-miR396b-5p	gnl|ZmGDB|GRMZM2G067743_T01	2	21.025	1	21	147	168	UUCCACA-GCUUUCUUGAACUG	CCGUUCAAGAAAGCCUGUGGAA	Cleavage	seq=cds; coord=9:9812369..9814204:-1; parent_gene=GRMZM2G067743	1
zma-miR396b-5p	gnl|ZmGDB|GRMZM2G033612_T02	2	9.814	1	21	48	69	UUCCACA-GCUUUCUUGAACUG	CCGUUCAAGAAAGCCUGUGGAA	Cleavage	seq=cds; coord=5:13806785..13809605:-1; parent_gene=GRMZM2G033612	1
zma-miR396b-5p	gnl|ZmGDB|GRMZM2G067743_T02	2	21.025	1	21	364	385	UUCCACA-GCUUUCUUGAACUG	CCGUUCAAGAAAGCCUGUGGAA	Cleavage	seq=cds; coord=9:9812369..9814204:-1; parent_gene=GRMZM2G067743	1
zma-miR396b-5p	gnl|ZmGDB|GRMZM2G099862_T03	2	24.834	1	21	318	339	UUCCACA-GCUUUCUUGAACUG	CCGUUCAAGAAAGCAUGUGGAA	Cleavage	seq=cds; coord=2:225159572..225162289:-1; parent_gene=GRMZM2G099862	1
zma-miR396b-3p	gnl|ZmGDB|GRMZM2G328154_T01	3	16.736	1	21	86	106	GUUCAAUAAAGCUGUGGGAAA	UCUUCCACAGCUUUCUUGAAC	Cleavage	seq=cds; coord=9:15357333..15361490:-1; parent_gene=GRMZM2G328154	1
zma-miR396b-3p	gnl|ZmGDB|GRMZM2G178990_T01	3	22.654	1	21	176	196	GUUCAAUAAAGCUGUGGGAAA	UCUUCCACAGCUUUCUUGAAC	Cleavage	seq=cds; coord=4:173294957..173295667:1; parent_gene=GRMZM2G178990	1
zma-miR396b-3p	gnl|ZmGDB|GRMZM2G153797_T01	3	22.954	1	20	938	957	GUUCAAUAAAGCUGUGGGAA	UUCCCAAGGCUUUAUUGGAG	Cleavage	seq=cds; coord=4:237383949..237385613:1; parent_gene=GRMZM2G153797	1
zma-miR396a-5p	gnl|ZmGDB|GRMZM2G087671_T01	3	21.968	1	20	737	756	UUCCACAGCUUUCUUGAACU	AGUUUAAGAAAGCUGUCGAU	Cleavage	seq=cds; coord=6:135779127..135782735:1; parent_gene=GRMZM2G087671	1
zma-miR396a-5p	gnl|ZmGDB|GRMZM2G008283_T01	2.5	17.991	1	21	157	177	UUCCACAGCUUUCUUGAACUG	UACUUCAAGACAGUUGUGGAA	Translation	seq=cds; coord=3:8587471..8592158:-1; parent_gene=GRMZM2G008283	1
zma-miR396a-5p	gnl|ZmGDB|GRMZM2G008283_T02	2.5	17.991	1	21	187	207	UUCCACAGCUUUCUUGAACUG	UACUUCAAGACAGUUGUGGAA	Translation	seq=cds; coord=3:8587471..8592158:-1; parent_gene=GRMZM2G008283	1
zma-miR396a-5p	gnl|ZmGDB|GRMZM2G152526_T01	3	20.585	1	20	371	390	UUCCACAGCUUUCUUGAACU	AGUUUGGGAAGGUUGUGGAG	Cleavage	seq=cds; coord=1:143622295..143626633:1; parent_gene=GRMZM2G152526	1
zma-miR396a-5p	gnl|ZmGDB|GRMZM2G156656_T01	3	21.789	1	20	806	825	UUCCACAGCUUUCUUGAACU	AGUUUAAGAAGGUUGUAGAA	Cleavage	seq=cds; coord=1:295470099..295474847:1; parent_gene=GRMZM2G156656	1
zma-miR396a-5p	gnl|ZmGDB|GRMZM2G099862_T04	2	24.834	1	21	318	339	UUCCACA-GCUUUCUUGAACUG	CCGUUCAAGAAAGCAUGUGGAA	Cleavage	seq=cds; coord=2:225159573..225162090:-1; parent_gene=GRMZM2G099862	1
zma-miR396a-5p	gnl|ZmGDB|GRMZM2G178983_T01	3	19.805	1	20	136	155	UUCCACAGCUUUCUUGAACU	AGGUCAAGAAAGCCGUGGGA	Cleavage	seq=cds; coord=4:173299838..173300267:-1; parent_gene=GRMZM2G178983	1
zma-miR396a-5p	gnl|ZmGDB|GRMZM2G119359_T01	2	17.432	1	21	18	39	UUCCACA-GCUUUCUUGAACUG	CCGUUCAAGAAAGCCUGUGGAA	Cleavage	seq=cds; coord=9:25709471..25712485:1; parent_gene=GRMZM2G119359	1
zma-miR396a-5p	gnl|ZmGDB|GRMZM2G129147_T02	2	22.507	1	21	18	39	UUCCACA-GCUUUCUUGAACUG	CCGUUCAAGAAAGCCUGUGGAA	Cleavage	seq=cds; coord=10:140968794..140971765:-1; parent_gene=GRMZM2G129147	1
zma-miR396a-5p	gnl|ZmGDB|GRMZM2G098594_T03	2	15.604	1	21	18	39	UUCCACA-GCUUUCUUGAACUG	CCGUUCAAGAAAGCCUGUGGAA	Cleavage	seq=cds; coord=6:60193365..60196491:-1; parent_gene=GRMZM2G098594	1
zma-miR396a-5p	gnl|ZmGDB|GRMZM2G098594_T04	2	15.604	1	21	18	39	UUCCACA-GCUUUCUUGAACUG	CCGUUCAAGAAAGCCUGUGGAA	Cleavage	seq=cds; coord=6:60193371..60196425:-1; parent_gene=GRMZM2G098594	1
zma-miR396a-5p	gnl|ZmGDB|GRMZM2G067743_T01	2	21.025	1	21	147	168	UUCCACA-GCUUUCUUGAACUG	CCGUUCAAGAAAGCCUGUGGAA	Cleavage	seq=cds; coord=9:9812369..9814204:-1; parent_gene=GRMZM2G067743	1
zma-miR396a-5p	gnl|ZmGDB|GRMZM2G033612_T02	2	9.814	1	21	48	69	UUCCACA-GCUUUCUUGAACUG	CCGUUCAAGAAAGCCUGUGGAA	Cleavage	seq=cds; coord=5:13806785..13809605:-1; parent_gene=GRMZM2G033612	1
zma-miR396a-5p	gnl|ZmGDB|GRMZM2G067743_T02	2	21.025	1	21	364	385	UUCCACA-GCUUUCUUGAACUG	CCGUUCAAGAAAGCCUGUGGAA	Cleavage	seq=cds; coord=9:9812369..9814204:-1; parent_gene=GRMZM2G067743	1
zma-miR396a-5p	gnl|ZmGDB|GRMZM2G099862_T03	2	24.834	1	21	318	339	UUCCACA-GCUUUCUUGAACUG	CCGUUCAAGAAAGCAUGUGGAA	Cleavage	seq=cds; coord=2:225159572..225162289:-1; parent_gene=GRMZM2G099862	1
zma-miR396a-3p	gnl|ZmGDB|GRMZM2G328154_T01	3	16.736	1	21	86	106	GUUCAAUAAAGCUGUGGGAAA	UCUUCCACAGCUUUCUUGAAC	Cleavage	seq=cds; coord=9:15357333..15361490:-1; parent_gene=GRMZM2G328154	1
zma-miR396a-3p	gnl|ZmGDB|GRMZM2G178990_T01	3	22.654	1	21	176	196	GUUCAAUAAAGCUGUGGGAAA	UCUUCCACAGCUUUCUUGAAC	Cleavage	seq=cds; coord=4:173294957..173295667:1; parent_gene=GRMZM2G178990	1
zma-miR396a-3p	gnl|ZmGDB|GRMZM2G153797_T01	3	22.954	1	20	938	957	GUUCAAUAAAGCUGUGGGAA	UUCCCAAGGCUUUAUUGGAG	Cleavage	seq=cds; coord=4:237383949..237385613:1; parent_gene=GRMZM2G153797	1
zma-miR399a-5p	gnl|ZmGDB|AC203090.3_FGT001	2.5	15.47	1	20	290	309	GUGCGGUUCUCCUCUGGCAC	GUGGCAGAGGAGAACUGCGU	Cleavage	seq=cds; coord=1:214925304..214926658:1; parent_gene=AC203090.3_FG001	1
zma-miR399a-3p	gnl|ZmGDB|AC206165.3_FGT001	2.5	18.768	1	21	34	54	UGCCAAAGGAGAAUUGCCCUG	CAGGGUACGUCUCCUUUGGCA	Cleavage	seq=cds; coord=6:159694621..159696531:1; parent_gene=AC206165.3_FG001	1
zma-miR399c-5p	gnl|ZmGDB|GRMZM5G838804_T01	3	20.777	1	20	11	30	GGGUACGUCUCCUUUGGCAC	GUGCCGAAGGACACGUACAC	Translation	seq=cds; coord=3:215786271..215787588:1; parent_gene=GRMZM5G838804	1
zma-miR399c-5p	gnl|ZmGDB|GRMZM5G838804_T02	3	20.777	1	20	11	30	GGGUACGUCUCCUUUGGCAC	GUGCCGAAGGACACGUACAC	Translation	seq=cds; coord=3:215785771..215787483:1; parent_gene=GRMZM5G838804	1
zma-miR399c-5p	gnl|ZmGDB|GRMZM5G838804_T03	3	20.777	1	20	11	30	GGGUACGUCUCCUUUGGCAC	GUGCCGAAGGACACGUACAC	Translation	seq=cds; coord=3:215785743..215787588:1; parent_gene=GRMZM5G838804	1
zma-miR399c-3p	gnl|ZmGDB|AC206165.3_FGT001	2.5	18.768	1	21	34	54	UGCCAAAGGAGAAUUGCCCUG	CAGGGUACGUCUCCUUUGGCA	Cleavage	seq=cds; coord=6:159694621..159696531:1; parent_gene=AC206165.3_FG001	1
zma-miR399b-5p	gnl|ZmGDB|GRMZM2G085089_T01	3	17.359	1	20	1345	1364	GUGCAGCUCUCCUCUGGCAU	AUGGCGGGGGAGAGCUGCGU	Cleavage	seq=cds; coord=5:59305449..59307120:1; parent_gene=GRMZM2G085089	1
zma-miR399b-3p	gnl|ZmGDB|AC206165.3_FGT001	3	18.768	1	21	34	54	UGCCAAAGGAGAGCUGUCCUG	CAGGGUACGUCUCCUUUGGCA	Cleavage	seq=cds; coord=6:159694621..159696531:1; parent_gene=AC206165.3_FG001	1
zma-miR399b-3p	gnl|ZmGDB|GRMZM2G148727_T01	3	19.043	1	21	2948	2968	UGCCAAAGGAGAGCUGUCCUG	CAGGACAGCUCAGCUUUGGUG	Translation	seq=cds; coord=5:15555821..15563245:-1; parent_gene=GRMZM2G148727	1
zma-miR399d-5p	gnl|ZmGDB|GRMZM2G125378_T01	3	17.249	1	21	30	49	GUGUGGCUCUCCUCUGGCAUG	CAUGCCAGAGGAGAGC-ACAU	Cleavage	seq=cds; coord=4:165973008..165976049:-1; parent_gene=GRMZM2G125378	1
zma-miR399d-5p	gnl|ZmGDB|GRMZM2G030422_T03	3	17.533	1	21	936	956	GUGUGGCUCUCCUCUGGCAUG	CAUGUCUGAGGAGAGCCAUAA	Cleavage	seq=cds; coord=1:35240624..35250929:-1; parent_gene=GRMZM2G030422	1
zma-miR399d-5p	gnl|ZmGDB|GRMZM2G146395_T01	2.5	24.268	1	20	229	248	GUGUGGCUCUCCUCUGGCAU	GUGCCAGAGGACAGCUACAU	Translation	seq=cds; coord=2:57540774..57543444:-1; parent_gene=GRMZM2G146395	1
zma-miR399d-5p	gnl|ZmGDB|AC193398.3_FGT001	2.5	12.344	1	20	1	20	GUGUGGCUCUCCUCUGGCAU	AUGCCAGAAGGGAGUUACAC	Cleavage	seq=cds; coord=4:3583981..3585585:-1; parent_gene=AC193398.3_FG001	1
zma-miR399d-5p	gnl|ZmGDB|GRMZM2G310674_T02	3	17.345	1	21	333	353	GUGUGGCUCUCCUCUGGCAUG	UAUGCCGGAUGAGAGGCACAC	Cleavage	seq=cds; coord=10:16355064..16361012:1; parent_gene=GRMZM2G310674	1
zma-miR399d-3p	gnl|ZmGDB|AC206165.3_FGT001	2.5	18.768	1	21	34	54	UGCCAAAGGAGAGCUGCCCUG	CAGGGUACGUCUCCUUUGGCA	Cleavage	seq=cds; coord=6:159694621..159696531:1; parent_gene=AC206165.3_FG001	1
zma-miR399e-5p	gnl|ZmGDB|GRMZM2G135654_T03	1.5	19.879	1	20	32	51	GGGCUUCUCUUUCUUGGCAG	CUGCCAAGAAGGAGAGGCUC	Cleavage	seq=cds; coord=1:194732560..194735038:-1; parent_gene=GRMZM2G135654	1
zma-miR399e-5p	gnl|ZmGDB|GRMZM2G135654_T02	1.5	20.977	1	20	299	318	GGGCUUCUCUUUCUUGGCAG	CUGCCAAGAAGGAGAGGCUC	Cleavage	seq=cds; coord=1:194731583..194734665:-1; parent_gene=GRMZM2G135654	1
zma-miR399e-5p	gnl|ZmGDB|GRMZM2G135654_T01	1.5	20.977	1	20	299	318	GGGCUUCUCUUUCUUGGCAG	CUGCCAAGAAGGAGAGGCUC	Cleavage	seq=cds; coord=1:194731583..194734717:-1; parent_gene=GRMZM2G135654	1
zma-miR399e-5p	gnl|ZmGDB|GRMZM2G178968_T02	2	22.185	1	20	32	51	GGGCUUCUCUUUCUUGGCAG	CUGCCAAGAAGGAGAGGCUU	Cleavage	seq=cds; coord=2:192412489..192414292:-1; parent_gene=GRMZM2G178968	1
zma-miR399e-5p	gnl|ZmGDB|GRMZM2G042599_T04	3	24.67	1	21	100	120	GGGCUUCUCUUUCUUGGCAGG	CUGGCCAAGAAAGGGAAGCCG	Cleavage	seq=cds; coord=2:3942271..3945882:-1; parent_gene=GRMZM2G042599	1
zma-miR399e-5p	gnl|ZmGDB|GRMZM2G042599_T02	3	24.67	1	21	100	120	GGGCUUCUCUUUCUUGGCAGG	CUGGCCAAGAAAGGGAAGCCG	Cleavage	seq=cds; coord=2:3942180..3945882:-1; parent_gene=GRMZM2G042599	1
zma-miR399e-5p	gnl|ZmGDB|AC193319.3_FGT004	3	23.04	1	20	2	21	GGGCUUCUCUUUCUUGGCAG	UGGCCAAGAAGGAGAAGUCC	Cleavage	seq=cds; coord=4:85141293..85141781:1; parent_gene=AC193319.3_FG004	1
zma-miR399e-5p	gnl|ZmGDB|GRMZM2G042599_T01	3	24.67	1	21	100	120	GGGCUUCUCUUUCUUGGCAGG	CUGGCCAAGAAAGGGAAGCCG	Cleavage	seq=cds; coord=2:3942180..3945882:-1; parent_gene=GRMZM2G042599	1
zma-miR399e-5p	gnl|ZmGDB|GRMZM2G042599_T03	3	24.67	1	21	100	120	GGGCUUCUCUUUCUUGGCAGG	CUGGCCAAGAAAGGGAAGCCG	Cleavage	seq=cds; coord=2:3942271..3945882:-1; parent_gene=GRMZM2G042599	1
zma-miR399e-5p	gnl|ZmGDB|GRMZM2G160364_T01	3	23.862	1	21	1237	1257	GGGCUUCUCUUUCUUGGCAGG	CCUGUCAAGAAGCAGAAGCCA	Translation	seq=cds; coord=7:117235763..117243088:-1; parent_gene=GRMZM2G160364	1
zma-miR399e-5p	gnl|ZmGDB|GRMZM2G102878_T02	3	20.069	1	21	1684	1704	GGGCUUCUCUUUCUUGGCAGG	CCUUCUAAGAAGGAGAAGCCA	Cleavage	seq=cds; coord=2:191811639..191821028:-1; parent_gene=GRMZM2G102878	1
zma-miR399e-5p	gnl|ZmGDB|GRMZM2G102878_T01	3	20.069	1	21	1747	1767	GGGCUUCUCUUUCUUGGCAGG	CCUUCUAAGAAGGAGAAGCCA	Cleavage	seq=cds; coord=2:191811639..191821204:-1; parent_gene=GRMZM2G102878	1
zma-miR399e-5p	gnl|ZmGDB|GRMZM2G048305_T02	3	14.631	1	21	2143	2163	GGGCUUCUCUUUCUUGGCAGG	CCUGUCAAGAAAGUGAAGCUA	Cleavage	seq=cds; coord=3:30853195..30856309:1; parent_gene=GRMZM2G048305	1
zma-miR399e-5p	gnl|ZmGDB|GRMZM2G048305_T01	3	14.631	1	21	2143	2163	GGGCUUCUCUUUCUUGGCAGG	CCUGUCAAGAAAGUGAAGCUA	Cleavage	seq=cds; coord=3:30853146..30856672:1; parent_gene=GRMZM2G048305	1
zma-miR399e-3p	gnl|ZmGDB|AC206165.3_FGT001	2.5	18.768	1	21	34	54	UGCCAAAGGAGAGUUGCCCUG	CAGGGUACGUCUCCUUUGGCA	Cleavage	seq=cds; coord=6:159694621..159696531:1; parent_gene=AC206165.3_FG001	1
zma-miR399f-5p	gnl|ZmGDB|GRMZM2G361376_T01	2.5	24.261	1	21	1016	1036	GGGCAACUUCUCCUUUGGCAG	CUGCCAAAGGAGGGGCUGCCC	Cleavage	seq=cds; coord=3:232020417..232024370:1; parent_gene=GRMZM2G361376	1
zma-miR399f-5p	gnl|ZmGDB|AC188756.2_FGT002	1.5	22.448	1	20	300	319	GGGCAACUUCUCCUUUGGCA	UGCCAAAAGAGGAGUUGCCC	Cleavage	seq=cds; coord=9:38370335..38371751:-1; parent_gene=AC188756.2_FG002	1
zma-miR399f-5p	gnl|ZmGDB|GRMZM5G839032_T01	2.5	22.051	1	21	268	288	GGGCAACUUCUCCUUUGGCAG	UUGCCAAAGAAGAGGUUGCUU	Cleavage	seq=cds; coord=5:9799395..9799715:1; parent_gene=GRMZM5G839032	1
zma-miR399f-5p	gnl|ZmGDB|GRMZM5G856189_T01	2.5	22.051	1	21	268	288	GGGCAACUUCUCCUUUGGCAG	UUGCCAAAGAAGAGGUUGCUU	Cleavage	seq=cds; coord=mitochondrion:486574..486894:1; parent_gene=GRMZM5G856189	1
zma-miR399f-5p	gnl|ZmGDB|GRMZM2G116133_T06	3	20.025	1	21	215	235	GGGCAACUUCUCCUUUGGCAG	CUGACAAAGGAAAAGUUGCCA	Translation	seq=cds; coord=5:64914410..64920069:1; parent_gene=GRMZM2G116133	1
zma-miR399f-5p	gnl|ZmGDB|GRMZM2G116133_T03	3	20.025	1	21	215	235	GGGCAACUUCUCCUUUGGCAG	CUGACAAAGGAAAAGUUGCCA	Translation	seq=cds; coord=5:64913998..64920069:1; parent_gene=GRMZM2G116133	1
zma-miR399f-5p	gnl|ZmGDB|GRMZM2G116133_T01	3	20.025	1	21	215	235	GGGCAACUUCUCCUUUGGCAG	CUGACAAAGGAAAAGUUGCCA	Translation	seq=cds; coord=5:64913992..64924248:1; parent_gene=GRMZM2G116133	1
zma-miR399f-5p	gnl|ZmGDB|GRMZM2G116133_T07	3	20.025	1	21	215	235	GGGCAACUUCUCCUUUGGCAG	CUGACAAAGGAAAAGUUGCCA	Translation	seq=cds; coord=5:64916441..64924248:1; parent_gene=GRMZM2G116133	1
zma-miR156j-5p	gnl|ZmGDB|AC233751.1_FGT002	0	23.513	1	21	1414	1434	UGACAGAAGAGAGAGAGCACA	UGUGCUCUCUCUCUUCUGUCA	Cleavage	seq=cds; coord=4:44780143..44784469:-1; parent_gene=AC233751.1_FG002	1
zma-miR156j-5p	gnl|ZmGDB|GRMZM5G878561_T01	0	19.127	1	21	949	969	UGACAGAAGAGAGAGAGCACA	UGUGCUCUCUCUCUUCUGUCA	Cleavage	seq=cds; coord=3:159377754..159382446:-1; parent_gene=GRMZM5G878561	1
zma-miR156j-5p	gnl|ZmGDB|GRMZM2G061734_T01	0	17.452	1	21	940	960	UGACAGAAGAGAGAGAGCACA	UGUGCUCUCUCUCUUCUGUCA	Cleavage	seq=cds; coord=2:192157754..192162802:1; parent_gene=GRMZM2G061734	1
zma-miR156j-5p	gnl|ZmGDB|GRMZM2G460544_T01	0	20.772	1	21	847	867	UGACAGAAGAGAGAGAGCACA	UGUGCUCUCUCUCUUCUGUCA	Cleavage	seq=cds; coord=4:199278823..199283117:-1; parent_gene=GRMZM2G460544	1
zma-miR156j-5p	gnl|ZmGDB|GRMZM2G126018_T01	0	18.45	1	21	778	798	UGACAGAAGAGAGAGAGCACA	UGUGCUCUCUCUCUUCUGUCA	Cleavage	seq=cds; coord=2:189838793..189842695:-1; parent_gene=GRMZM2G126018	1
zma-miR156j-5p	gnl|ZmGDB|GRMZM2G126018_T02	0	18.45	1	21	778	798	UGACAGAAGAGAGAGAGCACA	UGUGCUCUCUCUCUUCUGUCA	Cleavage	seq=cds; coord=2:189838915..189842817:-1; parent_gene=GRMZM2G126018	1
zma-miR156j-5p	gnl|ZmGDB|GRMZM2G307588_T01	0	16.689	1	21	763	783	UGACAGAAGAGAGAGAGCACA	UGUGCUCUCUCUCUUCUGUCA	Cleavage	seq=cds; coord=7:133170018..133173665:-1; parent_gene=GRMZM2G307588	1
zma-miR156j-5p	gnl|ZmGDB|GRMZM2G106798_T01	0	22.998	1	21	754	774	UGACAGAAGAGAGAGAGCACA	UGUGCUCUCUCUCUUCUGUCA	Cleavage	seq=cds; coord=4:17489205..17501119:1; parent_gene=GRMZM2G106798	1
zma-miR156j-5p	gnl|ZmGDB|GRMZM2G106798_T03	0	22.998	1	21	754	774	UGACAGAAGAGAGAGAGCACA	UGUGCUCUCUCUCUUCUGUCA	Cleavage	seq=cds; coord=4:17489205..17501119:1; parent_gene=GRMZM2G106798	1
zma-miR156j-5p	gnl|ZmGDB|GRMZM2G106798_T02	0	22.998	1	21	754	774	UGACAGAAGAGAGAGAGCACA	UGUGCUCUCUCUCUUCUGUCA	Cleavage	seq=cds; coord=4:17489205..17501119:1; parent_gene=GRMZM2G106798	1
zma-miR156j-5p	gnl|ZmGDB|GRMZM2G371033_T01	0	18.515	1	21	589	609	UGACAGAAGAGAGAGAGCACA	UGUGCUCUCUCUCUUCUGUCA	Cleavage	seq=cds; coord=8:161522745..161525837:-1; parent_gene=GRMZM2G371033	1
zma-miR156j-5p	gnl|ZmGDB|GRMZM5G806833_T01	0	15.225	1	21	427	447	UGACAGAAGAGAGAGAGCACA	UGUGCUCUCUCUCUUCUGUCA	Cleavage	seq=cds; coord=7:136328788..136330155:-1; parent_gene=GRMZM5G806833	1
zma-miR156j-5p	gnl|ZmGDB|GRMZM2G097275_T03	0	21.867	1	20	1106	1125	UGACAGAAGAGAGAGAGCAC	GUGCUCUCUCUCUUCUGUCA	Cleavage	seq=cds; coord=5:77940666..77945676:1; parent_gene=GRMZM2G097275	1
zma-miR156j-5p	gnl|ZmGDB|GRMZM2G097275_T02	0	21.867	1	20	1106	1125	UGACAGAAGAGAGAGAGCAC	GUGCUCUCUCUCUUCUGUCA	Cleavage	seq=cds; coord=5:77940666..77945676:1; parent_gene=GRMZM2G097275	1
zma-miR156j-5p	gnl|ZmGDB|GRMZM2G097275_T01	0	21.867	1	20	1106	1125	UGACAGAAGAGAGAGAGCAC	GUGCUCUCUCUCUUCUGUCA	Cleavage	seq=cds; coord=5:77940666..77945714:1; parent_gene=GRMZM2G097275	1
zma-miR156j-5p	gnl|ZmGDB|GRMZM2G097275_T04	0	21.867	1	20	998	1017	UGACAGAAGAGAGAGAGCAC	GUGCUCUCUCUCUUCUGUCA	Cleavage	seq=cds; coord=5:77940666..77945477:1; parent_gene=GRMZM2G097275	1
zma-miR156j-3p	gnl|ZmGDB|GRMZM5G839240_T01	2	14.508	1	20	73	92	UGCUCUCUGCUCUCACUGUC	CACAGGGAGAGCAGAGAGCA	Cleavage	seq=cds; coord=3:71913667..71914200:1; parent_gene=GRMZM5G839240	1
zma-miR156j-3p	gnl|ZmGDB|GRMZM5G826024_T01	2	16.341	1	20	136	155	UGCUCUCUGCUCUCACUGUC	CACAGGGAGAGCAGAGAGCA	Cleavage	seq=cds; coord=3:71921400..71922035:1; parent_gene=GRMZM5G826024	1
zma-miR156j-3p	gnl|ZmGDB|GRMZM2G118078_T01	3	17.277	1	21	99	119	UGCUCUCUGCUCUCACUGUCA	UGAUAGUGAGAACAGAGAACA	Translation	seq=cds; coord=8:120244979..120245647:1; parent_gene=GRMZM2G118078	1
zma-miR156j-3p	gnl|ZmGDB|GRMZM2G374460_T01	2.5	22.772	1	20	185	204	UGCUCUCUGCUCUCACUGUC	CACAGAGAGAGCAGGGAGCA	Cleavage	seq=cds; coord=2:219514570..219515151:1; parent_gene=GRMZM2G374460	1
zma-miR156j-3p	gnl|ZmGDB|GRMZM2G703778_T01	2.5	20.143	1	20	80	99	UGCUCUCUGCUCUCACUGUC	CACAGGGAGAGCAGGGAGCA	Cleavage	seq=cds; coord=1:155387191..155387675:-1; parent_gene=GRMZM2G703778	1
zma-miR156j-3p	gnl|ZmGDB|AC208308.3_FGT004	2.5	20.143	1	20	80	99	UGCUCUCUGCUCUCACUGUC	CACAGGGAGAGCAGGGAGCA	Cleavage	seq=cds; coord=1:155392124..155392609:-1; parent_gene=AC208308.3_FG004	1
zma-miR159a-3p	gnl|ZmGDB|GRMZM2G416652_T01	1	20.367	1	20	798	817	UUUGGAUUGAAGGGAGCUCU	CGAGCUCCCUUCAAUCCAAA	Cleavage	seq=cds; coord=9:90038076..90047250:-1; parent_gene=GRMZM2G416652	1
zma-miR159a-3p	gnl|ZmGDB|GRMZM2G416652_T02	1	20.367	1	20	798	817	UUUGGAUUGAAGGGAGCUCU	CGAGCUCCCUUCAAUCCAAA	Cleavage	seq=cds; coord=9:90038338..90047250:-1; parent_gene=GRMZM2G416652	1
zma-miR159a-3p	gnl|ZmGDB|GRMZM2G167088_T01	1	20.367	1	20	798	817	UUUGGAUUGAAGGGAGCUCU	CGAGCUCCCUUCAAUCCAAA	Cleavage	seq=cds; coord=9:90079570..90086572:-1; parent_gene=GRMZM2G167088	1
zma-miR159a-3p	gnl|ZmGDB|GRMZM2G423833_T01	1.5	16.255	1	21	905	925	UUUGGAUUGAAGGGAGCUCUG	CAGAGAUCCCUUCGAUCCAAA	Cleavage	seq=cds; coord=6:89138035..89141019:-1; parent_gene=GRMZM2G423833	1
zma-miR159a-3p	gnl|ZmGDB|GRMZM2G004090_T01	1.5	20.447	1	20	798	817	UUUGGAUUGAAGGGAGCUCU	CGAGCUCCCUUCAGUCCAAA	Cleavage	seq=cds; coord=9:90125460..90132277:-1; parent_gene=GRMZM2G004090	1
zma-miR159a-3p	gnl|ZmGDB|GRMZM2G093789_T01	2	17.64	1	21	872	892	UUUGGAUUGAAGGGAGCUCUG	CAGAGAUUCCUUCGAUCCAAA	Cleavage	seq=cds; coord=6:89240540..89253660:-1; parent_gene=GRMZM2G093789	1
zma-miR159a-3p	gnl|ZmGDB|GRMZM2G075064_T01	2	18.026	1	21	617	637	UUUGGAUUGAAGGGAGCUCUG	CGGAGAUCCCUUCGAUCCAAA	Cleavage	seq=cds; coord=6:102317765..102320107:-1; parent_gene=GRMZM2G075064	1
zma-miR159a-3p	gnl|ZmGDB|AC209015.3_FGT004	2	13.983	1	21	328	348	UUUGGAUUGAAGGGAGCUCUG	CGGAGAUCCCUUCGAUCCAAA	Cleavage	seq=cds; coord=6:102323695..102324231:-1; parent_gene=AC209015.3_FG004	1
zma-miR159a-3p	gnl|ZmGDB|GRMZM2G139688_T01	2.5	17.184	1	21	977	997	UUUGGAUUGAAGGGAGCUCUG	UGGAGCUCCCUUCACUCCAAG	Cleavage	seq=cds; coord=3:187002242..187006264:-1; parent_gene=GRMZM2G139688	1
zma-miR159a-3p	gnl|ZmGDB|GRMZM2G028054_T02	2	16.122	1	21	971	991	UUUGGAUUGAAGGGAGCUCUG	UGGAGCCCCCUUCAGUCCAAA	Cleavage	seq=cds; coord=8:171172099..171175888:-1; parent_gene=GRMZM2G028054	1
zma-miR159a-3p	gnl|ZmGDB|GRMZM2G028054_T03	2	16.122	1	21	971	991	UUUGGAUUGAAGGGAGCUCUG	UGGAGCCCCCUUCAGUCCAAA	Cleavage	seq=cds; coord=8:171172099..171175888:-1; parent_gene=GRMZM2G028054	1
zma-miR159a-3p	gnl|ZmGDB|GRMZM2G028054_T01	2	16.122	1	21	971	991	UUUGGAUUGAAGGGAGCUCUG	UGGAGCCCCCUUCAGUCCAAA	Cleavage	seq=cds; coord=8:171172057..171175888:-1; parent_gene=GRMZM2G028054	1
zma-miR159a-3p	gnl|ZmGDB|AC204352.3_FGT012	2.5	20.466	1	21	650	670	UUUGGAUUGAAGGGAGCUCUG	CAGAGCACCCUUCAAGCCAAA	Cleavage	seq=cds; coord=6:156830401..156831790:-1; parent_gene=AC204352.3_FG012	1
zma-miR159a-3p	gnl|ZmGDB|GRMZM2G046443_T01	2	24.756	1	21	292	312	UUUGGAUUGAAGGGAGCUCUG	UGGAGCUCCAUUCGAUCCAAA	Cleavage	seq=cds; coord=1:190313406..190314657:1; parent_gene=GRMZM2G046443	1
zma-miR159a-3p	gnl|ZmGDB|GRMZM2G376684_T01	2	13.939	1	21	764	784	UUUGGAUUGAAGGGAGCUCUG	UGGAGAUCCCUUCGAUCCAAA	Cleavage	seq=cds; coord=6:102313193..102315769:-1; parent_gene=GRMZM2G376684	1
zma-miR159a-3p	gnl|ZmGDB|GRMZM2G070523_T01	3	16.911	1	21	869	889	UUUGGAUUGAAGGGAGCUCUG	UGGAGCUCCCUUCAAACCAAU	Cleavage	seq=cds; coord=5:20197754..20200691:-1; parent_gene=GRMZM2G070523	1
zma-miR159a-3p	gnl|ZmGDB|GRMZM2G070523_T03	3	16.911	1	21	869	889	UUUGGAUUGAAGGGAGCUCUG	UGGAGCUCCCUUCAAACCAAU	Cleavage	seq=cds; coord=5:20197986..20200588:-1; parent_gene=GRMZM2G070523	1
zma-miR159a-3p	gnl|ZmGDB|GRMZM2G070523_T02	3	16.911	1	21	869	889	UUUGGAUUGAAGGGAGCUCUG	UGGAGCUCCCUUCAAACCAAU	Cleavage	seq=cds; coord=5:20199067..20200640:-1; parent_gene=GRMZM2G070523	1
zma-miR159a-3p	gnl|ZmGDB|GRMZM2G038195_T02	3	16.182	1	21	841	861	UUUGGAUUGAAGGGAGCUCUG	CAGAACUUCCUUCAAUUCAAC	Cleavage	seq=cds; coord=4:230556482..230569470:1; parent_gene=GRMZM2G038195	1
zma-miR159a-3p	gnl|ZmGDB|GRMZM2G038195_T01	3	16.182	1	21	841	861	UUUGGAUUGAAGGGAGCUCUG	CAGAACUUCCUUCAAUUCAAC	Cleavage	seq=cds; coord=4:230556470..230569433:1; parent_gene=GRMZM2G038195	1
zma-miR159a-3p	gnl|ZmGDB|GRMZM2G085550_T02	3	19.999	1	21	488	508	UUUGGAUUGAAGGGAGCUCUG	CGGAGCCCCCUUCAAACCAAA	Cleavage	seq=cds; coord=3:3558092..3560574:1; parent_gene=GRMZM2G085550	1
zma-miR159b-3p	gnl|ZmGDB|GRMZM2G416652_T01	1	20.367	1	20	798	817	UUUGGAUUGAAGGGAGCUCU	CGAGCUCCCUUCAAUCCAAA	Cleavage	seq=cds; coord=9:90038076..90047250:-1; parent_gene=GRMZM2G416652	1
zma-miR159b-3p	gnl|ZmGDB|GRMZM2G416652_T02	1	20.367	1	20	798	817	UUUGGAUUGAAGGGAGCUCU	CGAGCUCCCUUCAAUCCAAA	Cleavage	seq=cds; coord=9:90038338..90047250:-1; parent_gene=GRMZM2G416652	1
zma-miR159b-3p	gnl|ZmGDB|GRMZM2G167088_T01	1	20.367	1	20	798	817	UUUGGAUUGAAGGGAGCUCU	CGAGCUCCCUUCAAUCCAAA	Cleavage	seq=cds; coord=9:90079570..90086572:-1; parent_gene=GRMZM2G167088	1
zma-miR159b-3p	gnl|ZmGDB|GRMZM2G423833_T01	1.5	16.255	1	21	905	925	UUUGGAUUGAAGGGAGCUCUG	CAGAGAUCCCUUCGAUCCAAA	Cleavage	seq=cds; coord=6:89138035..89141019:-1; parent_gene=GRMZM2G423833	1
zma-miR159b-3p	gnl|ZmGDB|GRMZM2G004090_T01	1.5	20.447	1	20	798	817	UUUGGAUUGAAGGGAGCUCU	CGAGCUCCCUUCAGUCCAAA	Cleavage	seq=cds; coord=9:90125460..90132277:-1; parent_gene=GRMZM2G004090	1
zma-miR159b-3p	gnl|ZmGDB|GRMZM2G093789_T01	2	17.64	1	21	872	892	UUUGGAUUGAAGGGAGCUCUG	CAGAGAUUCCUUCGAUCCAAA	Cleavage	seq=cds; coord=6:89240540..89253660:-1; parent_gene=GRMZM2G093789	1
zma-miR159b-3p	gnl|ZmGDB|GRMZM2G075064_T01	2	18.026	1	21	617	637	UUUGGAUUGAAGGGAGCUCUG	CGGAGAUCCCUUCGAUCCAAA	Cleavage	seq=cds; coord=6:102317765..102320107:-1; parent_gene=GRMZM2G075064	1
zma-miR159b-3p	gnl|ZmGDB|AC209015.3_FGT004	2	13.983	1	21	328	348	UUUGGAUUGAAGGGAGCUCUG	CGGAGAUCCCUUCGAUCCAAA	Cleavage	seq=cds; coord=6:102323695..102324231:-1; parent_gene=AC209015.3_FG004	1
zma-miR159b-3p	gnl|ZmGDB|GRMZM2G139688_T01	2.5	17.184	1	21	977	997	UUUGGAUUGAAGGGAGCUCUG	UGGAGCUCCCUUCACUCCAAG	Cleavage	seq=cds; coord=3:187002242..187006264:-1; parent_gene=GRMZM2G139688	1
zma-miR159b-3p	gnl|ZmGDB|GRMZM2G028054_T02	2	16.122	1	21	971	991	UUUGGAUUGAAGGGAGCUCUG	UGGAGCCCCCUUCAGUCCAAA	Cleavage	seq=cds; coord=8:171172099..171175888:-1; parent_gene=GRMZM2G028054	1
zma-miR159b-3p	gnl|ZmGDB|GRMZM2G028054_T03	2	16.122	1	21	971	991	UUUGGAUUGAAGGGAGCUCUG	UGGAGCCCCCUUCAGUCCAAA	Cleavage	seq=cds; coord=8:171172099..171175888:-1; parent_gene=GRMZM2G028054	1
zma-miR159b-3p	gnl|ZmGDB|GRMZM2G028054_T01	2	16.122	1	21	971	991	UUUGGAUUGAAGGGAGCUCUG	UGGAGCCCCCUUCAGUCCAAA	Cleavage	seq=cds; coord=8:171172057..171175888:-1; parent_gene=GRMZM2G028054	1
zma-miR159b-3p	gnl|ZmGDB|AC204352.3_FGT012	2.5	20.466	1	21	650	670	UUUGGAUUGAAGGGAGCUCUG	CAGAGCACCCUUCAAGCCAAA	Cleavage	seq=cds; coord=6:156830401..156831790:-1; parent_gene=AC204352.3_FG012	1
zma-miR159b-3p	gnl|ZmGDB|GRMZM2G046443_T01	2	24.756	1	21	292	312	UUUGGAUUGAAGGGAGCUCUG	UGGAGCUCCAUUCGAUCCAAA	Cleavage	seq=cds; coord=1:190313406..190314657:1; parent_gene=GRMZM2G046443	1
zma-miR159b-3p	gnl|ZmGDB|GRMZM2G376684_T01	2	13.939	1	21	764	784	UUUGGAUUGAAGGGAGCUCUG	UGGAGAUCCCUUCGAUCCAAA	Cleavage	seq=cds; coord=6:102313193..102315769:-1; parent_gene=GRMZM2G376684	1
zma-miR159b-3p	gnl|ZmGDB|GRMZM2G070523_T01	3	16.911	1	21	869	889	UUUGGAUUGAAGGGAGCUCUG	UGGAGCUCCCUUCAAACCAAU	Cleavage	seq=cds; coord=5:20197754..20200691:-1; parent_gene=GRMZM2G070523	1
zma-miR159b-3p	gnl|ZmGDB|GRMZM2G070523_T03	3	16.911	1	21	869	889	UUUGGAUUGAAGGGAGCUCUG	UGGAGCUCCCUUCAAACCAAU	Cleavage	seq=cds; coord=5:20197986..20200588:-1; parent_gene=GRMZM2G070523	1
zma-miR159b-3p	gnl|ZmGDB|GRMZM2G070523_T02	3	16.911	1	21	869	889	UUUGGAUUGAAGGGAGCUCUG	UGGAGCUCCCUUCAAACCAAU	Cleavage	seq=cds; coord=5:20199067..20200640:-1; parent_gene=GRMZM2G070523	1
zma-miR159b-3p	gnl|ZmGDB|GRMZM2G038195_T02	3	16.182	1	21	841	861	UUUGGAUUGAAGGGAGCUCUG	CAGAACUUCCUUCAAUUCAAC	Cleavage	seq=cds; coord=4:230556482..230569470:1; parent_gene=GRMZM2G038195	1
zma-miR159b-3p	gnl|ZmGDB|GRMZM2G038195_T01	3	16.182	1	21	841	861	UUUGGAUUGAAGGGAGCUCUG	CAGAACUUCCUUCAAUUCAAC	Cleavage	seq=cds; coord=4:230556470..230569433:1; parent_gene=GRMZM2G038195	1
zma-miR159b-3p	gnl|ZmGDB|GRMZM2G085550_T02	3	19.999	1	21	488	508	UUUGGAUUGAAGGGAGCUCUG	CGGAGCCCCCUUCAAACCAAA	Cleavage	seq=cds; coord=3:3558092..3560574:1; parent_gene=GRMZM2G085550	1
zma-miR159c-5p	gnl|ZmGDB|GRMZM2G027100_T01	1.5	20.235	1	20	100	119	GAGCUCCCUUCGAUCCAAUC	GCUUGGAUUGAAGGGAGCUC	Cleavage	seq=cds; coord=3:2748284..2748460:-1; parent_gene=GRMZM2G027100	1
zma-miR159c-5p	gnl|ZmGDB|GRMZM2G027100_T02	1.5	19.716	1	20	100	119	GAGCUCCCUUCGAUCCAAUC	GCUUGGAUUGAAGGGAGCUC	Cleavage	seq=cds; coord=3:2748194..2748460:-1; parent_gene=GRMZM2G027100	1
zma-miR159c-5p	gnl|ZmGDB|GRMZM2G127720_T01	1.5	18.624	1	20	100	119	GAGCUCCCUUCGAUCCAAUC	GCUUGGAUUGAAGGGAGCUC	Cleavage	seq=cds; coord=8:26822627..26822951:1; parent_gene=GRMZM2G127720	1
zma-miR159c-5p	gnl|ZmGDB|GRMZM2G014004_T02	3	17.678	1	20	267	286	GAGCUCCCUUCGAUCCAAUC	GAUUGGACUGAAUGGAGUUC	Cleavage	seq=cds; coord=4:196513488..196545715:-1; parent_gene=GRMZM2G014004	1
zma-miR159c-5p	gnl|ZmGDB|GRMZM2G014004_T01	3	17.678	1	20	267	286	GAGCUCCCUUCGAUCCAAUC	GAUUGGACUGAAUGGAGUUC	Cleavage	seq=cds; coord=4:196513488..196545715:-1; parent_gene=GRMZM2G014004	1
zma-miR159c-3p	gnl|ZmGDB|GRMZM2G139688_T01	1.5	17.184	1	20	978	997	CUUGGAUUGAAGGGAGCUCC	GGAGCUCCCUUCACUCCAAG	Cleavage	seq=cds; coord=3:187002242..187006264:-1; parent_gene=GRMZM2G139688	1
zma-miR159c-3p	gnl|ZmGDB|GRMZM2G416652_T01	2	20.367	1	20	798	817	CUUGGAUUGAAGGGAGCUCC	CGAGCUCCCUUCAAUCCAAA	Cleavage	seq=cds; coord=9:90038076..90047250:-1; parent_gene=GRMZM2G416652	1
zma-miR159c-3p	gnl|ZmGDB|GRMZM2G416652_T02	2	20.367	1	20	798	817	CUUGGAUUGAAGGGAGCUCC	CGAGCUCCCUUCAAUCCAAA	Cleavage	seq=cds; coord=9:90038338..90047250:-1; parent_gene=GRMZM2G416652	1
zma-miR159c-3p	gnl|ZmGDB|GRMZM2G167088_T01	2	20.367	1	20	798	817	CUUGGAUUGAAGGGAGCUCC	CGAGCUCCCUUCAAUCCAAA	Cleavage	seq=cds; coord=9:90079570..90086572:-1; parent_gene=GRMZM2G167088	1
zma-miR159c-3p	gnl|ZmGDB|GRMZM2G096647_T08	2.5	20.435	1	21	12	32	CUUGGAUUGAAGGGAGCUCCU	AGGAGCUUUCUUCAGUUCAGG	Cleavage	seq=cds; coord=8:23802653..23806260:-1; parent_gene=GRMZM2G096647	1
zma-miR159c-3p	gnl|ZmGDB|GRMZM2G004090_T01	2.5	20.447	1	20	798	817	CUUGGAUUGAAGGGAGCUCC	CGAGCUCCCUUCAGUCCAAA	Cleavage	seq=cds; coord=9:90125460..90132277:-1; parent_gene=GRMZM2G004090	1
zma-miR159c-3p	gnl|ZmGDB|GRMZM2G070523_T01	2.5	16.911	1	20	870	889	CUUGGAUUGAAGGGAGCUCC	GGAGCUCCCUUCAAACCAAU	Cleavage	seq=cds; coord=5:20197754..20200691:-1; parent_gene=GRMZM2G070523	1
zma-miR159c-3p	gnl|ZmGDB|GRMZM2G070523_T02	2.5	16.911	1	20	870	889	CUUGGAUUGAAGGGAGCUCC	GGAGCUCCCUUCAAACCAAU	Cleavage	seq=cds; coord=5:20199067..20200640:-1; parent_gene=GRMZM2G070523	1
zma-miR159c-3p	gnl|ZmGDB|GRMZM2G070523_T03	2.5	16.911	1	20	870	889	CUUGGAUUGAAGGGAGCUCC	GGAGCUCCCUUCAAACCAAU	Cleavage	seq=cds; coord=5:20197986..20200588:-1; parent_gene=GRMZM2G070523	1
zma-miR159c-3p	gnl|ZmGDB|GRMZM2G007502_T01	2.5	18.344	1	20	64	83	CUUGGAUUGAAGGGAGCUCC	GGAGCUCCCUUCAACUCGAG	Cleavage	seq=cds; coord=9:69755829..69757294:1; parent_gene=GRMZM2G007502	1
zma-miR159c-3p	gnl|ZmGDB|GRMZM2G503279_T01	2.5	23.924	1	21	102	122	CUUGGAUUGAAGGGAGCUCCU	GGGAGCACCCUUCAGUCCAAC	Cleavage	seq=cds; coord=8:148276552..148277605:1; parent_gene=GRMZM2G503279	1
zma-miR159c-3p	gnl|ZmGDB|GRMZM2G028054_T01	2.5	16.122	1	20	972	991	CUUGGAUUGAAGGGAGCUCC	GGAGCCCCCUUCAGUCCAAA	Cleavage	seq=cds; coord=8:171172057..171175888:-1; parent_gene=GRMZM2G028054	1
zma-miR159c-3p	gnl|ZmGDB|GRMZM2G028054_T03	2.5	16.122	1	20	972	991	CUUGGAUUGAAGGGAGCUCC	GGAGCCCCCUUCAGUCCAAA	Cleavage	seq=cds; coord=8:171172099..171175888:-1; parent_gene=GRMZM2G028054	1
zma-miR159c-3p	gnl|ZmGDB|GRMZM2G028054_T02	2.5	16.122	1	20	972	991	CUUGGAUUGAAGGGAGCUCC	GGAGCCCCCUUCAGUCCAAA	Cleavage	seq=cds; coord=8:171172099..171175888:-1; parent_gene=GRMZM2G028054	1
zma-miR159c-3p	gnl|ZmGDB|GRMZM2G046443_T01	2.5	24.756	1	20	293	312	CUUGGAUUGAAGGGAGCUCC	GGAGCUCCAUUCGAUCCAAA	Cleavage	seq=cds; coord=1:190313406..190314657:1; parent_gene=GRMZM2G046443	1
zma-miR159c-3p	gnl|ZmGDB|GRMZM2G376684_T01	2.5	13.939	1	20	765	784	CUUGGAUUGAAGGGAGCUCC	GGAGAUCCCUUCGAUCCAAA	Cleavage	seq=cds; coord=6:102313193..102315769:-1; parent_gene=GRMZM2G376684	1
zma-miR159c-3p	gnl|ZmGDB|GRMZM2G075064_T01	2.5	18.026	1	20	618	637	CUUGGAUUGAAGGGAGCUCC	GGAGAUCCCUUCGAUCCAAA	Cleavage	seq=cds; coord=6:102317765..102320107:-1; parent_gene=GRMZM2G075064	1
zma-miR159c-3p	gnl|ZmGDB|AC209015.3_FGT004	2.5	13.983	1	20	329	348	CUUGGAUUGAAGGGAGCUCC	GGAGAUCCCUUCGAUCCAAA	Cleavage	seq=cds; coord=6:102323695..102324231:-1; parent_gene=AC209015.3_FG004	1
zma-miR159d-5p	gnl|ZmGDB|GRMZM2G027100_T01	1.5	20.235	1	20	100	119	GAGCUCCCUUCGAUCCAAUC	GCUUGGAUUGAAGGGAGCUC	Cleavage	seq=cds; coord=3:2748284..2748460:-1; parent_gene=GRMZM2G027100	1
zma-miR159d-5p	gnl|ZmGDB|GRMZM2G027100_T02	1.5	19.716	1	20	100	119	GAGCUCCCUUCGAUCCAAUC	GCUUGGAUUGAAGGGAGCUC	Cleavage	seq=cds; coord=3:2748194..2748460:-1; parent_gene=GRMZM2G027100	1
zma-miR159d-5p	gnl|ZmGDB|GRMZM2G127720_T01	1.5	18.624	1	20	100	119	GAGCUCCCUUCGAUCCAAUC	GCUUGGAUUGAAGGGAGCUC	Cleavage	seq=cds; coord=8:26822627..26822951:1; parent_gene=GRMZM2G127720	1
zma-miR159d-5p	gnl|ZmGDB|GRMZM2G014004_T02	3	17.678	1	20	267	286	GAGCUCCCUUCGAUCCAAUC	GAUUGGACUGAAUGGAGUUC	Cleavage	seq=cds; coord=4:196513488..196545715:-1; parent_gene=GRMZM2G014004	1
zma-miR159d-5p	gnl|ZmGDB|GRMZM2G014004_T01	3	17.678	1	20	267	286	GAGCUCCCUUCGAUCCAAUC	GAUUGGACUGAAUGGAGUUC	Cleavage	seq=cds; coord=4:196513488..196545715:-1; parent_gene=GRMZM2G014004	1
zma-miR159d-3p	gnl|ZmGDB|GRMZM2G139688_T01	1.5	17.184	1	20	978	997	CUUGGAUUGAAGGGAGCUCC	GGAGCUCCCUUCACUCCAAG	Cleavage	seq=cds; coord=3:187002242..187006264:-1; parent_gene=GRMZM2G139688	1
zma-miR159d-3p	gnl|ZmGDB|GRMZM2G416652_T01	2	20.367	1	20	798	817	CUUGGAUUGAAGGGAGCUCC	CGAGCUCCCUUCAAUCCAAA	Cleavage	seq=cds; coord=9:90038076..90047250:-1; parent_gene=GRMZM2G416652	1
zma-miR159d-3p	gnl|ZmGDB|GRMZM2G416652_T02	2	20.367	1	20	798	817	CUUGGAUUGAAGGGAGCUCC	CGAGCUCCCUUCAAUCCAAA	Cleavage	seq=cds; coord=9:90038338..90047250:-1; parent_gene=GRMZM2G416652	1
zma-miR159d-3p	gnl|ZmGDB|GRMZM2G167088_T01	2	20.367	1	20	798	817	CUUGGAUUGAAGGGAGCUCC	CGAGCUCCCUUCAAUCCAAA	Cleavage	seq=cds; coord=9:90079570..90086572:-1; parent_gene=GRMZM2G167088	1
zma-miR159d-3p	gnl|ZmGDB|GRMZM2G096647_T08	2.5	20.435	1	21	12	32	CUUGGAUUGAAGGGAGCUCCU	AGGAGCUUUCUUCAGUUCAGG	Cleavage	seq=cds; coord=8:23802653..23806260:-1; parent_gene=GRMZM2G096647	1
zma-miR159d-3p	gnl|ZmGDB|GRMZM2G004090_T01	2.5	20.447	1	20	798	817	CUUGGAUUGAAGGGAGCUCC	CGAGCUCCCUUCAGUCCAAA	Cleavage	seq=cds; coord=9:90125460..90132277:-1; parent_gene=GRMZM2G004090	1
zma-miR159d-3p	gnl|ZmGDB|GRMZM2G070523_T01	2.5	16.911	1	20	870	889	CUUGGAUUGAAGGGAGCUCC	GGAGCUCCCUUCAAACCAAU	Cleavage	seq=cds; coord=5:20197754..20200691:-1; parent_gene=GRMZM2G070523	1
zma-miR159d-3p	gnl|ZmGDB|GRMZM2G070523_T02	2.5	16.911	1	20	870	889	CUUGGAUUGAAGGGAGCUCC	GGAGCUCCCUUCAAACCAAU	Cleavage	seq=cds; coord=5:20199067..20200640:-1; parent_gene=GRMZM2G070523	1
zma-miR159d-3p	gnl|ZmGDB|GRMZM2G070523_T03	2.5	16.911	1	20	870	889	CUUGGAUUGAAGGGAGCUCC	GGAGCUCCCUUCAAACCAAU	Cleavage	seq=cds; coord=5:20197986..20200588:-1; parent_gene=GRMZM2G070523	1
zma-miR159d-3p	gnl|ZmGDB|GRMZM2G007502_T01	2.5	18.344	1	20	64	83	CUUGGAUUGAAGGGAGCUCC	GGAGCUCCCUUCAACUCGAG	Cleavage	seq=cds; coord=9:69755829..69757294:1; parent_gene=GRMZM2G007502	1
zma-miR159d-3p	gnl|ZmGDB|GRMZM2G503279_T01	2.5	23.924	1	21	102	122	CUUGGAUUGAAGGGAGCUCCU	GGGAGCACCCUUCAGUCCAAC	Cleavage	seq=cds; coord=8:148276552..148277605:1; parent_gene=GRMZM2G503279	1
zma-miR159d-3p	gnl|ZmGDB|GRMZM2G028054_T01	2.5	16.122	1	20	972	991	CUUGGAUUGAAGGGAGCUCC	GGAGCCCCCUUCAGUCCAAA	Cleavage	seq=cds; coord=8:171172057..171175888:-1; parent_gene=GRMZM2G028054	1
zma-miR159d-3p	gnl|ZmGDB|GRMZM2G028054_T03	2.5	16.122	1	20	972	991	CUUGGAUUGAAGGGAGCUCC	GGAGCCCCCUUCAGUCCAAA	Cleavage	seq=cds; coord=8:171172099..171175888:-1; parent_gene=GRMZM2G028054	1
zma-miR159d-3p	gnl|ZmGDB|GRMZM2G028054_T02	2.5	16.122	1	20	972	991	CUUGGAUUGAAGGGAGCUCC	GGAGCCCCCUUCAGUCCAAA	Cleavage	seq=cds; coord=8:171172099..171175888:-1; parent_gene=GRMZM2G028054	1
zma-miR159d-3p	gnl|ZmGDB|GRMZM2G046443_T01	2.5	24.756	1	20	293	312	CUUGGAUUGAAGGGAGCUCC	GGAGCUCCAUUCGAUCCAAA	Cleavage	seq=cds; coord=1:190313406..190314657:1; parent_gene=GRMZM2G046443	1
zma-miR159d-3p	gnl|ZmGDB|GRMZM2G376684_T01	2.5	13.939	1	20	765	784	CUUGGAUUGAAGGGAGCUCC	GGAGAUCCCUUCGAUCCAAA	Cleavage	seq=cds; coord=6:102313193..102315769:-1; parent_gene=GRMZM2G376684	1
zma-miR159d-3p	gnl|ZmGDB|GRMZM2G075064_T01	2.5	18.026	1	20	618	637	CUUGGAUUGAAGGGAGCUCC	GGAGAUCCCUUCGAUCCAAA	Cleavage	seq=cds; coord=6:102317765..102320107:-1; parent_gene=GRMZM2G075064	1
zma-miR159d-3p	gnl|ZmGDB|AC209015.3_FGT004	2.5	13.983	1	20	329	348	CUUGGAUUGAAGGGAGCUCC	GGAGAUCCCUUCGAUCCAAA	Cleavage	seq=cds; coord=6:102323695..102324231:-1; parent_gene=AC209015.3_FG004	1
zma-miR319a-5p	gnl|ZmGDB|GRMZM2G132082_T01	2.5	20.325	1	20	158	177	GAGCUCUCUUCAGUCCACUC	GAGUGAAUCGAAGAGAGCUC	Cleavage	seq=cds; coord=8:12568520..12569477:-1; parent_gene=GRMZM2G132082	1
zma-miR319a-5p	gnl|ZmGDB|GRMZM2G395357_T01	2.5	18.809	1	20	158	177	GAGCUCUCUUCAGUCCACUC	GAGUGAAUCGAAGAGAGCUC	Cleavage	seq=cds; coord=7:11898631..11900274:-1; parent_gene=GRMZM2G395357	1
zma-miR319a-5p	gnl|ZmGDB|GRMZM2G143202_T01	2.5	22.193	1	20	1110	1129	GAGCUCUCUUCAGUCCACUC	GACUGCACUGAGGAGAGCUC	Cleavage	seq=cds; coord=1:86838343..86848726:1; parent_gene=GRMZM2G143202	1
zma-miR319a-5p	gnl|ZmGDB|GRMZM2G154229_T01	2.5	18.002	1	20	2500	2519	GAGCUCUCUUCAGUCCACUC	GAGAAGACUGGAGAGAGCUC	Cleavage	seq=cds; coord=9:28614519..28620441:1; parent_gene=GRMZM2G154229	1
zma-miR319a-5p	gnl|ZmGDB|GRMZM2G059996_T01	3	13.996	1	20	152	171	GAGCUCUCUUCAGUCCACUC	GAGUGAAUCGAAGAGAGUUC	Cleavage	seq=cds; coord=2:213937771..213938126:-1; parent_gene=GRMZM2G059996	1
zma-miR319a-5p	gnl|ZmGDB|GRMZM2G014004_T01	3	17.678	1	20	267	286	GAGCUCUCUUCAGUCCACUC	GAUUGGACUGAAUGGAGUUC	Cleavage	seq=cds; coord=4:196513488..196545715:-1; parent_gene=GRMZM2G014004	1
zma-miR319a-5p	gnl|ZmGDB|GRMZM2G014004_T02	3	17.678	1	20	267	286	GAGCUCUCUUCAGUCCACUC	GAUUGGACUGAAUGGAGUUC	Cleavage	seq=cds; coord=4:196513488..196545715:-1; parent_gene=GRMZM2G014004	1
zma-miR319a-3p	gnl|ZmGDB|GRMZM2G028054_T03	2	16.03	1	20	971	990	UUGGACUGAAGGGUGCUCCC	UGGAGCCCCCUUCAGUCCAA	Cleavage	seq=cds; coord=8:171172099..171175888:-1; parent_gene=GRMZM2G028054	1
zma-miR319a-3p	gnl|ZmGDB|GRMZM2G028054_T01	2	16.03	1	20	971	990	UUGGACUGAAGGGUGCUCCC	UGGAGCCCCCUUCAGUCCAA	Cleavage	seq=cds; coord=8:171172057..171175888:-1; parent_gene=GRMZM2G028054	1
zma-miR319a-3p	gnl|ZmGDB|GRMZM2G028054_T02	2	16.03	1	20	971	990	UUGGACUGAAGGGUGCUCCC	UGGAGCCCCCUUCAGUCCAA	Cleavage	seq=cds; coord=8:171172099..171175888:-1; parent_gene=GRMZM2G028054	1
zma-miR319a-3p	gnl|ZmGDB|GRMZM2G115516_T02	2.5	18.845	1	20	106	125	UUGGACUGAAGGGUGCUCCC	AGGGGGACCCUUCAGUCCAA	Cleavage	seq=cds; coord=1:285310408..285314533:1; parent_gene=GRMZM2G115516	1
zma-miR319a-3p	gnl|ZmGDB|GRMZM2G180568_T01	2.5	18.393	1	20	754	773	UUGGACUGAAGGGUGCUCCC	CGGGGCACACUUCAGUCCAA	Cleavage	seq=cds; coord=7:168217960..168219041:-1; parent_gene=GRMZM2G180568	1
zma-miR319a-3p	gnl|ZmGDB|GRMZM2G089361_T01	2.5	18.038	1	20	937	956	UUGGACUGAAGGGUGCUCCC	AGGGGGACCCUUCAGUCCAA	Cleavage	seq=cds; coord=5:4945066..4946626:-1; parent_gene=GRMZM2G089361	1
zma-miR319a-3p	gnl|ZmGDB|GRMZM2G115516_T01	2.5	18.845	1	20	952	971	UUGGACUGAAGGGUGCUCCC	AGGGGGACCCUUCAGUCCAA	Cleavage	seq=cds; coord=1:285309991..285314535:1; parent_gene=GRMZM2G115516	1
zma-miR319a-3p	gnl|ZmGDB|GRMZM2G388987_T01	2.5	15.082	1	20	1160	1179	UUGGACUGAAGGGUGCUCCC	GGAAGCACCUUUCAGUUCAG	Cleavage	seq=cds; coord=6:95457491..95468437:1; parent_gene=GRMZM2G388987	1
zma-miR319a-3p	gnl|ZmGDB|GRMZM2G004090_T01	3	20.745	1	20	797	816	UUGGACUGAAGGGUGCUCCC	UCGAGCUCCCUUCAGUCCAA	Cleavage	seq=cds; coord=9:90125460..90132277:-1; parent_gene=GRMZM2G004090	1
zma-miR319a-3p	gnl|ZmGDB|GRMZM5G890162_T01	3	16.615	1	20	693	712	UUGGACUGAAGGGUGCUCCC	UGGAGCACCCUGCAGUUCAG	Translation	seq=cds; coord=7:49724338..49730222:1; parent_gene=GRMZM5G890162	1
zma-miR319a-3p	gnl|ZmGDB|GRMZM2G020805_T01	3	20.122	1	20	1087	1106	UUGGACUGAAGGGUGCUCCC	AGGGGGGCCCUUCAGUCCAA	Cleavage	seq=cds; coord=2:234795896..234802008:-1; parent_gene=GRMZM2G020805	1
zma-miR319a-3p	gnl|ZmGDB|GRMZM2G354502_T01	3	17.348	1	20	262	281	UUGGACUGAAGGGUGCUCCC	GUGAGCGCCCUCCAGUCCGA	Translation	seq=cds; coord=7:141931020..141932125:1; parent_gene=GRMZM2G354502	1
zma-miR319c-5p	gnl|ZmGDB|GRMZM2G132082_T01	2.5	20.325	1	20	158	177	GAGCUCUCUUCAGUCCACUC	GAGUGAAUCGAAGAGAGCUC	Cleavage	seq=cds; coord=8:12568520..12569477:-1; parent_gene=GRMZM2G132082	1
zma-miR319c-5p	gnl|ZmGDB|GRMZM2G395357_T01	2.5	18.809	1	20	158	177	GAGCUCUCUUCAGUCCACUC	GAGUGAAUCGAAGAGAGCUC	Cleavage	seq=cds; coord=7:11898631..11900274:-1; parent_gene=GRMZM2G395357	1
zma-miR319c-5p	gnl|ZmGDB|GRMZM2G143202_T01	2.5	22.193	1	20	1110	1129	GAGCUCUCUUCAGUCCACUC	GACUGCACUGAGGAGAGCUC	Cleavage	seq=cds; coord=1:86838343..86848726:1; parent_gene=GRMZM2G143202	1
zma-miR319c-5p	gnl|ZmGDB|GRMZM2G154229_T01	2.5	18.002	1	20	2500	2519	GAGCUCUCUUCAGUCCACUC	GAGAAGACUGGAGAGAGCUC	Cleavage	seq=cds; coord=9:28614519..28620441:1; parent_gene=GRMZM2G154229	1
zma-miR319c-5p	gnl|ZmGDB|GRMZM2G059996_T01	3	13.996	1	20	152	171	GAGCUCUCUUCAGUCCACUC	GAGUGAAUCGAAGAGAGUUC	Cleavage	seq=cds; coord=2:213937771..213938126:-1; parent_gene=GRMZM2G059996	1
zma-miR319c-5p	gnl|ZmGDB|GRMZM2G014004_T01	3	17.678	1	20	267	286	GAGCUCUCUUCAGUCCACUC	GAUUGGACUGAAUGGAGUUC	Cleavage	seq=cds; coord=4:196513488..196545715:-1; parent_gene=GRMZM2G014004	1
zma-miR319c-5p	gnl|ZmGDB|GRMZM2G014004_T02	3	17.678	1	20	267	286	GAGCUCUCUUCAGUCCACUC	GAUUGGACUGAAUGGAGUUC	Cleavage	seq=cds; coord=4:196513488..196545715:-1; parent_gene=GRMZM2G014004	1
zma-miR319c-3p	gnl|ZmGDB|GRMZM2G028054_T03	2	16.03	1	20	971	990	UUGGACUGAAGGGUGCUCCC	UGGAGCCCCCUUCAGUCCAA	Cleavage	seq=cds; coord=8:171172099..171175888:-1; parent_gene=GRMZM2G028054	1
zma-miR319c-3p	gnl|ZmGDB|GRMZM2G028054_T01	2	16.03	1	20	971	990	UUGGACUGAAGGGUGCUCCC	UGGAGCCCCCUUCAGUCCAA	Cleavage	seq=cds; coord=8:171172057..171175888:-1; parent_gene=GRMZM2G028054	1
zma-miR319c-3p	gnl|ZmGDB|GRMZM2G028054_T02	2	16.03	1	20	971	990	UUGGACUGAAGGGUGCUCCC	UGGAGCCCCCUUCAGUCCAA	Cleavage	seq=cds; coord=8:171172099..171175888:-1; parent_gene=GRMZM2G028054	1
zma-miR319c-3p	gnl|ZmGDB|GRMZM2G115516_T02	2.5	18.845	1	20	106	125	UUGGACUGAAGGGUGCUCCC	AGGGGGACCCUUCAGUCCAA	Cleavage	seq=cds; coord=1:285310408..285314533:1; parent_gene=GRMZM2G115516	1
zma-miR319c-3p	gnl|ZmGDB|GRMZM2G180568_T01	2.5	18.393	1	20	754	773	UUGGACUGAAGGGUGCUCCC	CGGGGCACACUUCAGUCCAA	Cleavage	seq=cds; coord=7:168217960..168219041:-1; parent_gene=GRMZM2G180568	1
zma-miR319c-3p	gnl|ZmGDB|GRMZM2G089361_T01	2.5	18.038	1	20	937	956	UUGGACUGAAGGGUGCUCCC	AGGGGGACCCUUCAGUCCAA	Cleavage	seq=cds; coord=5:4945066..4946626:-1; parent_gene=GRMZM2G089361	1
zma-miR319c-3p	gnl|ZmGDB|GRMZM2G115516_T01	2.5	18.845	1	20	952	971	UUGGACUGAAGGGUGCUCCC	AGGGGGACCCUUCAGUCCAA	Cleavage	seq=cds; coord=1:285309991..285314535:1; parent_gene=GRMZM2G115516	1
zma-miR319c-3p	gnl|ZmGDB|GRMZM2G388987_T01	2.5	15.082	1	20	1160	1179	UUGGACUGAAGGGUGCUCCC	GGAAGCACCUUUCAGUUCAG	Cleavage	seq=cds; coord=6:95457491..95468437:1; parent_gene=GRMZM2G388987	1
zma-miR319c-3p	gnl|ZmGDB|GRMZM2G004090_T01	3	20.745	1	20	797	816	UUGGACUGAAGGGUGCUCCC	UCGAGCUCCCUUCAGUCCAA	Cleavage	seq=cds; coord=9:90125460..90132277:-1; parent_gene=GRMZM2G004090	1
zma-miR319c-3p	gnl|ZmGDB|GRMZM5G890162_T01	3	16.615	1	20	693	712	UUGGACUGAAGGGUGCUCCC	UGGAGCACCCUGCAGUUCAG	Translation	seq=cds; coord=7:49724338..49730222:1; parent_gene=GRMZM5G890162	1
zma-miR319c-3p	gnl|ZmGDB|GRMZM2G020805_T01	3	20.122	1	20	1087	1106	UUGGACUGAAGGGUGCUCCC	AGGGGGGCCCUUCAGUCCAA	Cleavage	seq=cds; coord=2:234795896..234802008:-1; parent_gene=GRMZM2G020805	1
zma-miR319c-3p	gnl|ZmGDB|GRMZM2G354502_T01	3	17.348	1	20	262	281	UUGGACUGAAGGGUGCUCCC	GUGAGCGCCCUCCAGUCCGA	Translation	seq=cds; coord=7:141931020..141932125:1; parent_gene=GRMZM2G354502	1
zma-miR319b-5p	gnl|ZmGDB|GRMZM2G105360_T01	3	22.339	1	20	148	167	AGAGCGUCCUUCAGUCCACU	GUUGGAUUGAAGGAUGCUCU	Cleavage	seq=cds; coord=2:1915194..1916130:1; parent_gene=GRMZM2G105360	1
zma-miR319b-5p	gnl|ZmGDB|GRMZM2G468783_T01	3	17.561	1	20	592	611	AGAGCGUCCUUCAGUCCACU	GCUGGAUUGAAGGAUGCUCU	Cleavage	seq=cds; coord=8:157083488..157086077:1; parent_gene=GRMZM2G468783	1
zma-miR319b-5p	gnl|ZmGDB|GRMZM2G144020_T02	3	24.205	1	20	451	470	AGAGCGUCCUUCAGUCCACU	GCUGGAUUGAAGGAUGCUCU	Cleavage	seq=cds; coord=5:2265546..2268158:-1; parent_gene=GRMZM2G144020	1
zma-miR319b-5p	gnl|ZmGDB|AC196428.3_FGT003	3	17.561	1	20	736	755	AGAGCGUCCUUCAGUCCACU	GCUGGAUUGAAGGAUGCUCU	Cleavage	seq=cds; coord=7:81011648..81013673:-1; parent_gene=AC196428.3_FG003	1
zma-miR319b-5p	gnl|ZmGDB|AC202158.3_FGT001	3	18.498	1	20	736	755	AGAGCGUCCUUCAGUCCACU	GCUGGAUUGAAGGAUGCUCU	Cleavage	seq=cds; coord=1:180441194..180442773:-1; parent_gene=AC202158.3_FG001	1
zma-miR319b-5p	gnl|ZmGDB|GRMZM2G144020_T01	3	24.205	1	20	562	581	AGAGCGUCCUUCAGUCCACU	GCUGGAUUGAAGGAUGCUCU	Cleavage	seq=cds; coord=5:2265218..2268167:-1; parent_gene=GRMZM2G144020	1
zma-miR319b-5p	gnl|ZmGDB|GRMZM2G411448_T01	3	14.508	1	20	844	863	AGAGCGUCCUUCAGUCCACU	GCUGGAUUGAAGGAUGCUCU	Cleavage	seq=cds; coord=8:115487162..115492859:-1; parent_gene=GRMZM2G411448	1
zma-miR319b-5p	gnl|ZmGDB|GRMZM2G415882_T01	3	19.381	1	20	871	890	AGAGCGUCCUUCAGUCCACU	GCUGGAUUGAAGGAUGCUCU	Cleavage	seq=cds; coord=8:150005990..150009326:-1; parent_gene=GRMZM2G415882	1
zma-miR319b-5p	gnl|ZmGDB|GRMZM2G371935_T01	3	21.45	1	20	403	422	AGAGCGUCCUUCAGUCCACU	GCUGGAUUGAAGGAUGCUCU	Cleavage	seq=cds; coord=5:6899384..6903751:-1; parent_gene=GRMZM2G371935	1
zma-miR319b-5p	gnl|ZmGDB|AC209074.3_FGT007	3	18.329	1	20	607	626	AGAGCGUCCUUCAGUCCACU	GUUGGAUUGAAGGAUGCUCU	Cleavage	seq=cds; coord=8:164924251..164928829:-1; parent_gene=AC209074.3_FG007	1
zma-miR319b-5p	gnl|ZmGDB|GRMZM2G459811_T03	3	22.565	1	20	562	581	AGAGCGUCCUUCAGUCCACU	GCUGGAUUGAAGGAUGCUCU	Cleavage	seq=cds; coord=1:293793122..293796213:1; parent_gene=GRMZM2G459811	1
zma-miR319b-5p	gnl|ZmGDB|GRMZM2G459811_T02	3	22.565	1	20	562	581	AGAGCGUCCUUCAGUCCACU	GCUGGAUUGAAGGAUGCUCU	Cleavage	seq=cds; coord=1:293793122..293796213:1; parent_gene=GRMZM2G459811	1
zma-miR319b-5p	gnl|ZmGDB|GRMZM2G543205_T01	3	18.594	1	20	688	707	AGAGCGUCCUUCAGUCCACU	GCUGGAUUGAAGGAUGCUCU	Cleavage	seq=cds; coord=1:150784380..150788703:-1; parent_gene=GRMZM2G543205	1
zma-miR319b-3p	gnl|ZmGDB|GRMZM2G028054_T03	2	16.03	1	20	971	990	UUGGACUGAAGGGUGCUCCC	UGGAGCCCCCUUCAGUCCAA	Cleavage	seq=cds; coord=8:171172099..171175888:-1; parent_gene=GRMZM2G028054	1
zma-miR319b-3p	gnl|ZmGDB|GRMZM2G028054_T01	2	16.03	1	20	971	990	UUGGACUGAAGGGUGCUCCC	UGGAGCCCCCUUCAGUCCAA	Cleavage	seq=cds; coord=8:171172057..171175888:-1; parent_gene=GRMZM2G028054	1
zma-miR319b-3p	gnl|ZmGDB|GRMZM2G028054_T02	2	16.03	1	20	971	990	UUGGACUGAAGGGUGCUCCC	UGGAGCCCCCUUCAGUCCAA	Cleavage	seq=cds; coord=8:171172099..171175888:-1; parent_gene=GRMZM2G028054	1
zma-miR319b-3p	gnl|ZmGDB|GRMZM2G115516_T02	2.5	18.845	1	20	106	125	UUGGACUGAAGGGUGCUCCC	AGGGGGACCCUUCAGUCCAA	Cleavage	seq=cds; coord=1:285310408..285314533:1; parent_gene=GRMZM2G115516	1
zma-miR319b-3p	gnl|ZmGDB|GRMZM2G180568_T01	2.5	18.393	1	20	754	773	UUGGACUGAAGGGUGCUCCC	CGGGGCACACUUCAGUCCAA	Cleavage	seq=cds; coord=7:168217960..168219041:-1; parent_gene=GRMZM2G180568	1
zma-miR319b-3p	gnl|ZmGDB|GRMZM2G089361_T01	2.5	18.038	1	20	937	956	UUGGACUGAAGGGUGCUCCC	AGGGGGACCCUUCAGUCCAA	Cleavage	seq=cds; coord=5:4945066..4946626:-1; parent_gene=GRMZM2G089361	1
zma-miR319b-3p	gnl|ZmGDB|GRMZM2G115516_T01	2.5	18.845	1	20	952	971	UUGGACUGAAGGGUGCUCCC	AGGGGGACCCUUCAGUCCAA	Cleavage	seq=cds; coord=1:285309991..285314535:1; parent_gene=GRMZM2G115516	1
zma-miR319b-3p	gnl|ZmGDB|GRMZM2G388987_T01	2.5	15.082	1	20	1160	1179	UUGGACUGAAGGGUGCUCCC	GGAAGCACCUUUCAGUUCAG	Cleavage	seq=cds; coord=6:95457491..95468437:1; parent_gene=GRMZM2G388987	1
zma-miR319b-3p	gnl|ZmGDB|GRMZM2G004090_T01	3	20.745	1	20	797	816	UUGGACUGAAGGGUGCUCCC	UCGAGCUCCCUUCAGUCCAA	Cleavage	seq=cds; coord=9:90125460..90132277:-1; parent_gene=GRMZM2G004090	1
zma-miR319b-3p	gnl|ZmGDB|GRMZM5G890162_T01	3	16.615	1	20	693	712	UUGGACUGAAGGGUGCUCCC	UGGAGCACCCUGCAGUUCAG	Translation	seq=cds; coord=7:49724338..49730222:1; parent_gene=GRMZM5G890162	1
zma-miR319b-3p	gnl|ZmGDB|GRMZM2G020805_T01	3	20.122	1	20	1087	1106	UUGGACUGAAGGGUGCUCCC	AGGGGGGCCCUUCAGUCCAA	Cleavage	seq=cds; coord=2:234795896..234802008:-1; parent_gene=GRMZM2G020805	1
zma-miR319b-3p	gnl|ZmGDB|GRMZM2G354502_T01	3	17.348	1	20	262	281	UUGGACUGAAGGGUGCUCCC	GUGAGCGCCCUCCAGUCCGA	Translation	seq=cds; coord=7:141931020..141932125:1; parent_gene=GRMZM2G354502	1
zma-miR319d-5p	gnl|ZmGDB|GRMZM2G105360_T01	3	22.339	1	20	148	167	AGAGCGUCCUUCAGUCCACU	GUUGGAUUGAAGGAUGCUCU	Cleavage	seq=cds; coord=2:1915194..1916130:1; parent_gene=GRMZM2G105360	1
zma-miR319d-5p	gnl|ZmGDB|GRMZM2G468783_T01	3	17.561	1	20	592	611	AGAGCGUCCUUCAGUCCACU	GCUGGAUUGAAGGAUGCUCU	Cleavage	seq=cds; coord=8:157083488..157086077:1; parent_gene=GRMZM2G468783	1
zma-miR319d-5p	gnl|ZmGDB|GRMZM2G144020_T02	3	24.205	1	20	451	470	AGAGCGUCCUUCAGUCCACU	GCUGGAUUGAAGGAUGCUCU	Cleavage	seq=cds; coord=5:2265546..2268158:-1; parent_gene=GRMZM2G144020	1
zma-miR319d-5p	gnl|ZmGDB|AC196428.3_FGT003	3	17.561	1	20	736	755	AGAGCGUCCUUCAGUCCACU	GCUGGAUUGAAGGAUGCUCU	Cleavage	seq=cds; coord=7:81011648..81013673:-1; parent_gene=AC196428.3_FG003	1
zma-miR319d-5p	gnl|ZmGDB|AC202158.3_FGT001	3	18.498	1	20	736	755	AGAGCGUCCUUCAGUCCACU	GCUGGAUUGAAGGAUGCUCU	Cleavage	seq=cds; coord=1:180441194..180442773:-1; parent_gene=AC202158.3_FG001	1
zma-miR319d-5p	gnl|ZmGDB|GRMZM2G144020_T01	3	24.205	1	20	562	581	AGAGCGUCCUUCAGUCCACU	GCUGGAUUGAAGGAUGCUCU	Cleavage	seq=cds; coord=5:2265218..2268167:-1; parent_gene=GRMZM2G144020	1
zma-miR319d-5p	gnl|ZmGDB|GRMZM2G411448_T01	3	14.508	1	20	844	863	AGAGCGUCCUUCAGUCCACU	GCUGGAUUGAAGGAUGCUCU	Cleavage	seq=cds; coord=8:115487162..115492859:-1; parent_gene=GRMZM2G411448	1
zma-miR319d-5p	gnl|ZmGDB|GRMZM2G415882_T01	3	19.381	1	20	871	890	AGAGCGUCCUUCAGUCCACU	GCUGGAUUGAAGGAUGCUCU	Cleavage	seq=cds; coord=8:150005990..150009326:-1; parent_gene=GRMZM2G415882	1
zma-miR319d-5p	gnl|ZmGDB|GRMZM2G371935_T01	3	21.45	1	20	403	422	AGAGCGUCCUUCAGUCCACU	GCUGGAUUGAAGGAUGCUCU	Cleavage	seq=cds; coord=5:6899384..6903751:-1; parent_gene=GRMZM2G371935	1
zma-miR319d-5p	gnl|ZmGDB|AC209074.3_FGT007	3	18.329	1	20	607	626	AGAGCGUCCUUCAGUCCACU	GUUGGAUUGAAGGAUGCUCU	Cleavage	seq=cds; coord=8:164924251..164928829:-1; parent_gene=AC209074.3_FG007	1
zma-miR319d-5p	gnl|ZmGDB|GRMZM2G459811_T03	3	22.565	1	20	562	581	AGAGCGUCCUUCAGUCCACU	GCUGGAUUGAAGGAUGCUCU	Cleavage	seq=cds; coord=1:293793122..293796213:1; parent_gene=GRMZM2G459811	1
zma-miR319d-5p	gnl|ZmGDB|GRMZM2G459811_T02	3	22.565	1	20	562	581	AGAGCGUCCUUCAGUCCACU	GCUGGAUUGAAGGAUGCUCU	Cleavage	seq=cds; coord=1:293793122..293796213:1; parent_gene=GRMZM2G459811	1
zma-miR319d-5p	gnl|ZmGDB|GRMZM2G543205_T01	3	18.594	1	20	688	707	AGAGCGUCCUUCAGUCCACU	GCUGGAUUGAAGGAUGCUCU	Cleavage	seq=cds; coord=1:150784380..150788703:-1; parent_gene=GRMZM2G543205	1
zma-miR319d-3p	gnl|ZmGDB|GRMZM2G028054_T03	2	16.03	1	20	971	990	UUGGACUGAAGGGUGCUCCC	UGGAGCCCCCUUCAGUCCAA	Cleavage	seq=cds; coord=8:171172099..171175888:-1; parent_gene=GRMZM2G028054	1
zma-miR319d-3p	gnl|ZmGDB|GRMZM2G028054_T01	2	16.03	1	20	971	990	UUGGACUGAAGGGUGCUCCC	UGGAGCCCCCUUCAGUCCAA	Cleavage	seq=cds; coord=8:171172057..171175888:-1; parent_gene=GRMZM2G028054	1
zma-miR319d-3p	gnl|ZmGDB|GRMZM2G028054_T02	2	16.03	1	20	971	990	UUGGACUGAAGGGUGCUCCC	UGGAGCCCCCUUCAGUCCAA	Cleavage	seq=cds; coord=8:171172099..171175888:-1; parent_gene=GRMZM2G028054	1
zma-miR319d-3p	gnl|ZmGDB|GRMZM2G115516_T02	2.5	18.845	1	20	106	125	UUGGACUGAAGGGUGCUCCC	AGGGGGACCCUUCAGUCCAA	Cleavage	seq=cds; coord=1:285310408..285314533:1; parent_gene=GRMZM2G115516	1
zma-miR319d-3p	gnl|ZmGDB|GRMZM2G180568_T01	2.5	18.393	1	20	754	773	UUGGACUGAAGGGUGCUCCC	CGGGGCACACUUCAGUCCAA	Cleavage	seq=cds; coord=7:168217960..168219041:-1; parent_gene=GRMZM2G180568	1
zma-miR319d-3p	gnl|ZmGDB|GRMZM2G089361_T01	2.5	18.038	1	20	937	956	UUGGACUGAAGGGUGCUCCC	AGGGGGACCCUUCAGUCCAA	Cleavage	seq=cds; coord=5:4945066..4946626:-1; parent_gene=GRMZM2G089361	1
zma-miR319d-3p	gnl|ZmGDB|GRMZM2G115516_T01	2.5	18.845	1	20	952	971	UUGGACUGAAGGGUGCUCCC	AGGGGGACCCUUCAGUCCAA	Cleavage	seq=cds; coord=1:285309991..285314535:1; parent_gene=GRMZM2G115516	1
zma-miR319d-3p	gnl|ZmGDB|GRMZM2G388987_T01	2.5	15.082	1	20	1160	1179	UUGGACUGAAGGGUGCUCCC	GGAAGCACCUUUCAGUUCAG	Cleavage	seq=cds; coord=6:95457491..95468437:1; parent_gene=GRMZM2G388987	1
zma-miR319d-3p	gnl|ZmGDB|GRMZM2G004090_T01	3	20.745	1	20	797	816	UUGGACUGAAGGGUGCUCCC	UCGAGCUCCCUUCAGUCCAA	Cleavage	seq=cds; coord=9:90125460..90132277:-1; parent_gene=GRMZM2G004090	1
zma-miR319d-3p	gnl|ZmGDB|GRMZM5G890162_T01	3	16.615	1	20	693	712	UUGGACUGAAGGGUGCUCCC	UGGAGCACCCUGCAGUUCAG	Translation	seq=cds; coord=7:49724338..49730222:1; parent_gene=GRMZM5G890162	1
zma-miR319d-3p	gnl|ZmGDB|GRMZM2G020805_T01	3	20.122	1	20	1087	1106	UUGGACUGAAGGGUGCUCCC	AGGGGGGCCCUUCAGUCCAA	Cleavage	seq=cds; coord=2:234795896..234802008:-1; parent_gene=GRMZM2G020805	1
zma-miR319d-3p	gnl|ZmGDB|GRMZM2G354502_T01	3	17.348	1	20	262	281	UUGGACUGAAGGGUGCUCCC	GUGAGCGCCCUCCAGUCCGA	Translation	seq=cds; coord=7:141931020..141932125:1; parent_gene=GRMZM2G354502	1
zma-miR166k-5p	gnl|ZmGDB|AC197533.3_FGT009	2.5	15.565	1	21	342	362	GGAUUGUUGUCUGGCUCGGGG	UCCCGAACUAGACAAUAAUCU	Cleavage	seq=cds; coord=6:120921619..120922050:1; parent_gene=AC197533.3_FG009	1
zma-miR166k-5p	gnl|ZmGDB|GRMZM2G356609_T01	3	19.812	1	20	168	187	GGAUUGUUGUCUGGCUCGGG	CUCGAGCCAGGUGACAGUUC	Cleavage	seq=cds; coord=6:131236477..131237106:1; parent_gene=GRMZM2G356609	1
zma-miR166k-5p	gnl|ZmGDB|GRMZM5G888384_T01	3	19.554	1	20	1086	1105	GGAUUGUUGUCUGGCUCGGG	CUCGAGCCAGGUGACAGUUC	Cleavage	seq=cds; coord=4:56371853..56374355:1; parent_gene=GRMZM5G888384	1
zma-miR166k-3p	gnl|ZmGDB|GRMZM2G036557_T01	3	16.119	1	20	144	163	UCGGACCAGGCUUCAAUCCC	UGGAUUGGAGCAUGGUCUGA	Translation	seq=cds; coord=1:118952206..118954383:-1; parent_gene=GRMZM2G036557	1
zma-miR166k-3p	gnl|ZmGDB|GRMZM2G160996_T02	3	15.64	1	20	573	592	UCGGACCAGGCUUCAAUCCC	UGGAUUGGAGCAUGGUCUGA	Translation	seq=cds; coord=5:69283153..69286206:1; parent_gene=GRMZM2G160996	1
zma-miR166k-3p	gnl|ZmGDB|GRMZM2G109987_T04	3	24.232	1	20	573	592	UCGGACCAGGCUUCAAUCCC	UGGGAUGAAGCCUGGUCCGG	Cleavage	seq=cds; coord=9:154645740..154650601:-1; parent_gene=GRMZM2G109987	1
zma-miR166k-3p	gnl|ZmGDB|GRMZM2G160996_T01	3	15.64	1	20	897	916	UCGGACCAGGCUUCAAUCCC	UGGAUUGGAGCAUGGUCUGA	Translation	seq=cds; coord=5:69283153..69286206:1; parent_gene=GRMZM2G160996	1
zma-miR166k-3p	gnl|ZmGDB|GRMZM2G042250_T04	3	23.534	1	20	564	583	UCGGACCAGGCUUCAAUCCC	UGGGAUGAAGCCUGGUCCGG	Cleavage	seq=cds; coord=1:2793728..2798869:1; parent_gene=GRMZM2G042250	1
zma-miR166k-3p	gnl|ZmGDB|GRMZM2G469551_T02	3	19.005	1	20	543	562	UCGGACCAGGCUUCAAUCCC	UGGGAUGAAGCCUGGUCCGG	Cleavage	seq=cds; coord=1:230535887..230547084:-1; parent_gene=GRMZM2G469551	1
zma-miR166k-3p	gnl|ZmGDB|GRMZM2G003509_T02	3	21.178	1	20	45	64	UCGGACCAGGCUUCAAUCCC	UGGGAUGAAGCCUGGUCCGG	Cleavage	seq=cds; coord=1:173233523..173239064:-1; parent_gene=GRMZM2G003509	1
zma-miR166k-3p	gnl|ZmGDB|GRMZM2G109987_T01	3	24.232	1	20	573	592	UCGGACCAGGCUUCAAUCCC	UGGGAUGAAGCCUGGUCCGG	Cleavage	seq=cds; coord=9:154642336..154650601:-1; parent_gene=GRMZM2G109987	1
zma-miR166k-3p	gnl|ZmGDB|GRMZM2G109987_T03	3	24.232	1	20	573	592	UCGGACCAGGCUUCAAUCCC	UGGGAUGAAGCCUGGUCCGG	Cleavage	seq=cds; coord=9:154642336..154650601:-1; parent_gene=GRMZM2G109987	1
zma-miR166k-3p	gnl|ZmGDB|GRMZM2G469551_T01	3	19.005	1	20	543	562	UCGGACCAGGCUUCAAUCCC	UGGGAUGAAGCCUGGUCCGG	Cleavage	seq=cds; coord=1:230535106..230547084:-1; parent_gene=GRMZM2G469551	1
zma-miR166k-3p	gnl|ZmGDB|GRMZM2G042250_T01	3	23.534	1	20	564	583	UCGGACCAGGCUUCAAUCCC	UGGGAUGAAGCCUGGUCCGG	Cleavage	seq=cds; coord=1:2793728..2800641:1; parent_gene=GRMZM2G042250	1
zma-miR166k-3p	gnl|ZmGDB|GRMZM2G042250_T02	3	23.534	1	20	564	583	UCGGACCAGGCUUCAAUCCC	UGGGAUGAAGCCUGGUCCGG	Cleavage	seq=cds; coord=1:2793950..2800638:1; parent_gene=GRMZM2G042250	1
zma-miR166k-3p	gnl|ZmGDB|GRMZM2G109987_T05	3	24.232	1	20	573	592	UCGGACCAGGCUUCAAUCCC	UGGGAUGAAGCCUGGUCCGG	Cleavage	seq=cds; coord=9:154642733..154649986:-1; parent_gene=GRMZM2G109987	1
zma-miR166k-3p	gnl|ZmGDB|GRMZM2G109987_T02	3	24.232	1	20	573	592	UCGGACCAGGCUUCAAUCCC	UGGGAUGAAGCCUGGUCCGG	Cleavage	seq=cds; coord=9:154642336..154650601:-1; parent_gene=GRMZM2G109987	1
zma-miR166k-3p	gnl|ZmGDB|GRMZM2G003509_T01	3	21.036	1	20	588	607	UCGGACCAGGCUUCAAUCCC	UGGGAUGAAGCCUGGUCCGG	Cleavage	seq=cds; coord=1:173233037..173239064:-1; parent_gene=GRMZM2G003509	1
zma-miR166k-3p	gnl|ZmGDB|AC187157.4_FGT005	3	23.173	1	20	564	583	UCGGACCAGGCUUCAAUCCC	CGGGAUGAAGCCUGGUCCGG	Cleavage	seq=cds; coord=8:22640866..22645283:-1; parent_gene=AC187157.4_FG005	1
zma-miR166k-3p	gnl|ZmGDB|GRMZM2G042250_T03	3	23.534	1	20	564	583	UCGGACCAGGCUUCAAUCCC	UGGGAUGAAGCCUGGUCCGG	Cleavage	seq=cds; coord=1:2793728..2800614:1; parent_gene=GRMZM2G042250	1
zma-miR166k-3p	gnl|ZmGDB|GRMZM2G178102_T01	3	20.931	1	20	882	901	UCGGACCAGGCUUCAAUCCC	UGGGAUGAAGCCUGGUCCGG	Cleavage	seq=cds; coord=3:123263423..123270240:-1; parent_gene=GRMZM2G178102	1
zma-miR166k-3p	gnl|ZmGDB|AC208827.3_FGT002	3	16.209	1	21	267	287	UCGGACCAGGCUUCAAUCCCU	AAGGAAUGCAGCCUGGUCCGA	Cleavage	seq=cds; coord=10:47167600..47168316:-1; parent_gene=AC208827.3_FG002	1
zma-miR166j-5p	gnl|ZmGDB|AC205239.3_FGT005	0	15.5	1	22	26	47	GGUUUGUUUGUCUGGUUCAAGG	CCUUGAACCAGACAAACAAACC	Cleavage	seq=cds; coord=7:124539335..124539748:-1; parent_gene=AC205239.3_FG005	1
zma-miR166j-5p	gnl|ZmGDB|GRMZM2G039564_T01	2.5	20.486	1	21	301	321	GGUUUGUUUGUCUGGUUCAAG	CUUGAAUCAGAGAAGCAAACU	Translation	seq=cds; coord=2:117032961..117034549:1; parent_gene=GRMZM2G039564	1
zma-miR166j-5p	gnl|ZmGDB|GRMZM2G313519_T01	2	22.962	1	21	663	683	GGUUUGUUUGUCUGGUUCAAG	UUUGAACCAGAAGAGCAAACC	Translation	seq=cds; coord=9:150624269..150638882:1; parent_gene=GRMZM2G313519	1
zma-miR166j-5p	gnl|ZmGDB|GRMZM2G444935_T01	2.5	21.845	1	21	300	320	GGUUUGUUUGUCUGGUUCAAG	UUUGAACCGGAAGAGCAAACC	Translation	seq=cds; coord=8:35144765..35146432:1; parent_gene=GRMZM2G444935	1
zma-miR166j-5p	gnl|ZmGDB|AC212392.3_FGT001	2.5	20.712	1	21	726	746	GGUUUGUUUGUCUGGUUCAAG	UUUGAACCAGAAGAGCAAACU	Translation	seq=cds; coord=2:217710421..217712140:1; parent_gene=AC212392.3_FG001	1
zma-miR166j-5p	gnl|ZmGDB|GRMZM2G452309_T01	2.5	21.644	1	21	924	944	GGUUUGUUUGUCUGGUUCAAG	UUUGAACCGGAAGAGCAAACC	Translation	seq=cds; coord=4:99893583..99898762:1; parent_gene=GRMZM2G452309	1
zma-miR166j-5p	gnl|ZmGDB|GRMZM2G060822_T01	3	17.332	1	21	1336	1356	GGUUUGUUUGUCUGGUUCAAG	CUUGAAUCAGAGAAACAAAAC	Translation	seq=cds; coord=10:85526563..85531754:1; parent_gene=GRMZM2G060822	1
zma-miR166j-3p	gnl|ZmGDB|GRMZM2G036557_T01	3	16.119	1	20	144	163	UCGGACCAGGCUUCAAUCCC	UGGAUUGGAGCAUGGUCUGA	Translation	seq=cds; coord=1:118952206..118954383:-1; parent_gene=GRMZM2G036557	1
zma-miR166j-3p	gnl|ZmGDB|GRMZM2G160996_T02	3	15.64	1	20	573	592	UCGGACCAGGCUUCAAUCCC	UGGAUUGGAGCAUGGUCUGA	Translation	seq=cds; coord=5:69283153..69286206:1; parent_gene=GRMZM2G160996	1
zma-miR166j-3p	gnl|ZmGDB|GRMZM2G109987_T04	3	24.232	1	20	573	592	UCGGACCAGGCUUCAAUCCC	UGGGAUGAAGCCUGGUCCGG	Cleavage	seq=cds; coord=9:154645740..154650601:-1; parent_gene=GRMZM2G109987	1
zma-miR166j-3p	gnl|ZmGDB|GRMZM2G160996_T01	3	15.64	1	20	897	916	UCGGACCAGGCUUCAAUCCC	UGGAUUGGAGCAUGGUCUGA	Translation	seq=cds; coord=5:69283153..69286206:1; parent_gene=GRMZM2G160996	1
zma-miR166j-3p	gnl|ZmGDB|GRMZM2G042250_T04	3	23.534	1	20	564	583	UCGGACCAGGCUUCAAUCCC	UGGGAUGAAGCCUGGUCCGG	Cleavage	seq=cds; coord=1:2793728..2798869:1; parent_gene=GRMZM2G042250	1
zma-miR166j-3p	gnl|ZmGDB|GRMZM2G469551_T02	3	19.005	1	20	543	562	UCGGACCAGGCUUCAAUCCC	UGGGAUGAAGCCUGGUCCGG	Cleavage	seq=cds; coord=1:230535887..230547084:-1; parent_gene=GRMZM2G469551	1
zma-miR166j-3p	gnl|ZmGDB|GRMZM2G003509_T02	3	21.178	1	20	45	64	UCGGACCAGGCUUCAAUCCC	UGGGAUGAAGCCUGGUCCGG	Cleavage	seq=cds; coord=1:173233523..173239064:-1; parent_gene=GRMZM2G003509	1
zma-miR166j-3p	gnl|ZmGDB|GRMZM2G109987_T01	3	24.232	1	20	573	592	UCGGACCAGGCUUCAAUCCC	UGGGAUGAAGCCUGGUCCGG	Cleavage	seq=cds; coord=9:154642336..154650601:-1; parent_gene=GRMZM2G109987	1
zma-miR166j-3p	gnl|ZmGDB|GRMZM2G109987_T03	3	24.232	1	20	573	592	UCGGACCAGGCUUCAAUCCC	UGGGAUGAAGCCUGGUCCGG	Cleavage	seq=cds; coord=9:154642336..154650601:-1; parent_gene=GRMZM2G109987	1
zma-miR166j-3p	gnl|ZmGDB|GRMZM2G469551_T01	3	19.005	1	20	543	562	UCGGACCAGGCUUCAAUCCC	UGGGAUGAAGCCUGGUCCGG	Cleavage	seq=cds; coord=1:230535106..230547084:-1; parent_gene=GRMZM2G469551	1
zma-miR166j-3p	gnl|ZmGDB|GRMZM2G042250_T01	3	23.534	1	20	564	583	UCGGACCAGGCUUCAAUCCC	UGGGAUGAAGCCUGGUCCGG	Cleavage	seq=cds; coord=1:2793728..2800641:1; parent_gene=GRMZM2G042250	1
zma-miR166j-3p	gnl|ZmGDB|GRMZM2G042250_T02	3	23.534	1	20	564	583	UCGGACCAGGCUUCAAUCCC	UGGGAUGAAGCCUGGUCCGG	Cleavage	seq=cds; coord=1:2793950..2800638:1; parent_gene=GRMZM2G042250	1
zma-miR166j-3p	gnl|ZmGDB|GRMZM2G109987_T05	3	24.232	1	20	573	592	UCGGACCAGGCUUCAAUCCC	UGGGAUGAAGCCUGGUCCGG	Cleavage	seq=cds; coord=9:154642733..154649986:-1; parent_gene=GRMZM2G109987	1
zma-miR166j-3p	gnl|ZmGDB|GRMZM2G109987_T02	3	24.232	1	20	573	592	UCGGACCAGGCUUCAAUCCC	UGGGAUGAAGCCUGGUCCGG	Cleavage	seq=cds; coord=9:154642336..154650601:-1; parent_gene=GRMZM2G109987	1
zma-miR166j-3p	gnl|ZmGDB|GRMZM2G003509_T01	3	21.036	1	20	588	607	UCGGACCAGGCUUCAAUCCC	UGGGAUGAAGCCUGGUCCGG	Cleavage	seq=cds; coord=1:173233037..173239064:-1; parent_gene=GRMZM2G003509	1
zma-miR166j-3p	gnl|ZmGDB|AC187157.4_FGT005	3	23.173	1	20	564	583	UCGGACCAGGCUUCAAUCCC	CGGGAUGAAGCCUGGUCCGG	Cleavage	seq=cds; coord=8:22640866..22645283:-1; parent_gene=AC187157.4_FG005	1
zma-miR166j-3p	gnl|ZmGDB|GRMZM2G042250_T03	3	23.534	1	20	564	583	UCGGACCAGGCUUCAAUCCC	UGGGAUGAAGCCUGGUCCGG	Cleavage	seq=cds; coord=1:2793728..2800614:1; parent_gene=GRMZM2G042250	1
zma-miR166j-3p	gnl|ZmGDB|GRMZM2G178102_T01	3	20.931	1	20	882	901	UCGGACCAGGCUUCAAUCCC	UGGGAUGAAGCCUGGUCCGG	Cleavage	seq=cds; coord=3:123263423..123270240:-1; parent_gene=GRMZM2G178102	1
zma-miR166j-3p	gnl|ZmGDB|AC208827.3_FGT002	3	16.209	1	21	267	287	UCGGACCAGGCUUCAAUCCCU	AAGGAAUGCAGCCUGGUCCGA	Cleavage	seq=cds; coord=10:47167600..47168316:-1; parent_gene=AC208827.3_FG002	1
zma-miR167e-5p	gnl|ZmGDB|GRMZM2G112769_T01	3	17.536	1	21	1006	1027	UGAAGCUGCCAGCA-UGAUCUG	CAGAUUAAUGCUGGCAGUUUCA	Cleavage	seq=cds; coord=1:103774646..103779085:1; parent_gene=GRMZM2G112769	1
zma-miR167e-5p	gnl|ZmGDB|GRMZM2G042623_T02	3	17.536	1	21	994	1015	UGAAGCUGCCAGCA-UGAUCUG	CAGAUUAAUGCUGGCAGUUUCA	Cleavage	seq=cds; coord=8:134370594..134377908:1; parent_gene=GRMZM2G042623	1
zma-miR167e-5p	gnl|ZmGDB|GRMZM2G042623_T01	3	17.536	1	21	1006	1027	UGAAGCUGCCAGCA-UGAUCUG	CAGAUUAAUGCUGGCAGUUUCA	Cleavage	seq=cds; coord=8:134370592..134377931:1; parent_gene=GRMZM2G042623	1
zma-miR167e-5p	gnl|ZmGDB|GRMZM2G363338_T01	3	17.457	1	21	834	854	UGAAGCUGCCAGCAUGAUCUG	CACAUCAUGGUGGCGGCUUUA	Cleavage	seq=cds; coord=8:117799130..117801199:1; parent_gene=GRMZM2G363338	1
zma-miR167e-3p	gnl|ZmGDB|GRMZM2G022820_T01	3	17.32	1	22	825	846	GAUCAUGCUGUGCAGUUUCAUC	GGUGAGGCUGAACAGCAUGGUU	Cleavage	seq=cds; coord=6:44008169..44098049:-1; parent_gene=GRMZM2G022820	1
zma-miR167e-3p	gnl|ZmGDB|GRMZM2G058374_T01	3	13.651	1	22	1255	1276	GAUCAUGCUGUGCAGUUUCAUC	GAAGAAAUUGUUCAGCAUGAUC	Translation	seq=cds; coord=9:145371521..145379520:-1; parent_gene=GRMZM2G058374	1
zma-miR167e-3p	gnl|ZmGDB|GRMZM2G103137_T01	3	15.702	1	20	375	394	GAUCAUGCUGUGCAGUUUCA	UGAAGUUGCAUGGUAUGAUU	Cleavage	seq=cds; coord=9:18878748..18883992:-1; parent_gene=GRMZM2G103137	1
zma-miR167e-3p	gnl|ZmGDB|GRMZM2G103137_T07	3	15.702	1	20	375	394	GAUCAUGCUGUGCAGUUUCA	UGAAGUUGCAUGGUAUGAUU	Cleavage	seq=cds; coord=9:18878722..18883992:-1; parent_gene=GRMZM2G103137	1
zma-miR167e-3p	gnl|ZmGDB|GRMZM2G103137_T06	3	15.702	1	20	375	394	GAUCAUGCUGUGCAGUUUCA	UGAAGUUGCAUGGUAUGAUU	Cleavage	seq=cds; coord=9:18878722..18883992:-1; parent_gene=GRMZM2G103137	1
zma-miR167e-3p	gnl|ZmGDB|GRMZM2G103137_T05	3	15.702	1	20	375	394	GAUCAUGCUGUGCAGUUUCA	UGAAGUUGCAUGGUAUGAUU	Cleavage	seq=cds; coord=9:18878722..18883992:-1; parent_gene=GRMZM2G103137	1
zma-miR167e-3p	gnl|ZmGDB|AC209778.3_FGT002	3	9.735	1	21	376	396	GAUCAUGCUGUGCAGUUUCAU	GUGGAAAUGUACAGCAUGGUU	Cleavage	seq=cds; coord=9:126526475..126527004:-1; parent_gene=AC209778.3_FG002	1
zma-miR167f-5p	gnl|ZmGDB|GRMZM2G112769_T01	3	17.536	1	21	1006	1027	UGAAGCUGCCAGCA-UGAUCUG	CAGAUUAAUGCUGGCAGUUUCA	Cleavage	seq=cds; coord=1:103774646..103779085:1; parent_gene=GRMZM2G112769	1
zma-miR167f-5p	gnl|ZmGDB|GRMZM2G042623_T02	3	17.536	1	21	994	1015	UGAAGCUGCCAGCA-UGAUCUG	CAGAUUAAUGCUGGCAGUUUCA	Cleavage	seq=cds; coord=8:134370594..134377908:1; parent_gene=GRMZM2G042623	1
zma-miR167f-5p	gnl|ZmGDB|GRMZM2G042623_T01	3	17.536	1	21	1006	1027	UGAAGCUGCCAGCA-UGAUCUG	CAGAUUAAUGCUGGCAGUUUCA	Cleavage	seq=cds; coord=8:134370592..134377931:1; parent_gene=GRMZM2G042623	1
zma-miR167f-5p	gnl|ZmGDB|GRMZM2G363338_T01	3	17.457	1	21	834	854	UGAAGCUGCCAGCAUGAUCUG	CACAUCAUGGUGGCGGCUUUA	Cleavage	seq=cds; coord=8:117799130..117801199:1; parent_gene=GRMZM2G363338	1
zma-miR167g-5p	gnl|ZmGDB|GRMZM2G112769_T01	3	17.536	1	21	1006	1027	UGAAGCUGCCAGCA-UGAUCUG	CAGAUUAAUGCUGGCAGUUUCA	Cleavage	seq=cds; coord=1:103774646..103779085:1; parent_gene=GRMZM2G112769	1
zma-miR167g-5p	gnl|ZmGDB|GRMZM2G042623_T02	3	17.536	1	21	994	1015	UGAAGCUGCCAGCA-UGAUCUG	CAGAUUAAUGCUGGCAGUUUCA	Cleavage	seq=cds; coord=8:134370594..134377908:1; parent_gene=GRMZM2G042623	1
zma-miR167g-5p	gnl|ZmGDB|GRMZM2G042623_T01	3	17.536	1	21	1006	1027	UGAAGCUGCCAGCA-UGAUCUG	CAGAUUAAUGCUGGCAGUUUCA	Cleavage	seq=cds; coord=8:134370592..134377931:1; parent_gene=GRMZM2G042623	1
zma-miR167g-5p	gnl|ZmGDB|GRMZM2G363338_T01	3	17.457	1	21	834	854	UGAAGCUGCCAGCAUGAUCUG	CACAUCAUGGUGGCGGCUUUA	Cleavage	seq=cds; coord=8:117799130..117801199:1; parent_gene=GRMZM2G363338	1
zma-miR167g-3p	gnl|ZmGDB|GRMZM2G142019_T01	3	12.041	1	20	687	706	GGUCAUGCUGUAGUUUCAUC	CAUGAUAUUACAGCAUGAUC	Cleavage	seq=cds; coord=10:9592681..9598028:-1; parent_gene=GRMZM2G142019	1
zma-miR167g-3p	gnl|ZmGDB|GRMZM5G805132_T01	3	24.055	1	20	235	254	GGUCAUGCUGUAGUUUCAUC	GAUGAGGGUACAGCAUGGCU	Cleavage	seq=cds; coord=10:138806563..138807437:1; parent_gene=GRMZM5G805132	1
zma-miR167g-3p	gnl|ZmGDB|AC213884.3_FGT002	3	17.138	1	20	933	952	GGUCAUGCUGUAGUUUCAUC	GACGAAGCUGGAGCAUGACC	Translation	seq=cds; coord=6:140546904..140548013:1; parent_gene=AC213884.3_FG002	1
zma-miR167h-5p	gnl|ZmGDB|GRMZM2G112769_T01	3	17.536	1	21	1006	1027	UGAAGCUGCCAGCA-UGAUCUG	CAGAUUAAUGCUGGCAGUUUCA	Cleavage	seq=cds; coord=1:103774646..103779085:1; parent_gene=GRMZM2G112769	1
zma-miR167h-5p	gnl|ZmGDB|GRMZM2G042623_T02	3	17.536	1	21	994	1015	UGAAGCUGCCAGCA-UGAUCUG	CAGAUUAAUGCUGGCAGUUUCA	Cleavage	seq=cds; coord=8:134370594..134377908:1; parent_gene=GRMZM2G042623	1
zma-miR167h-5p	gnl|ZmGDB|GRMZM2G042623_T01	3	17.536	1	21	1006	1027	UGAAGCUGCCAGCA-UGAUCUG	CAGAUUAAUGCUGGCAGUUUCA	Cleavage	seq=cds; coord=8:134370592..134377931:1; parent_gene=GRMZM2G042623	1
zma-miR167h-5p	gnl|ZmGDB|GRMZM2G363338_T01	3	17.457	1	21	834	854	UGAAGCUGCCAGCAUGAUCUG	CACAUCAUGGUGGCGGCUUUA	Cleavage	seq=cds; coord=8:117799130..117801199:1; parent_gene=GRMZM2G363338	1
zma-miR167i-5p	gnl|ZmGDB|GRMZM2G112769_T01	3	17.536	1	21	1006	1027	UGAAGCUGCCAGCA-UGAUCUG	CAGAUUAAUGCUGGCAGUUUCA	Cleavage	seq=cds; coord=1:103774646..103779085:1; parent_gene=GRMZM2G112769	1
zma-miR167i-5p	gnl|ZmGDB|GRMZM2G042623_T02	3	17.536	1	21	994	1015	UGAAGCUGCCAGCA-UGAUCUG	CAGAUUAAUGCUGGCAGUUUCA	Cleavage	seq=cds; coord=8:134370594..134377908:1; parent_gene=GRMZM2G042623	1
zma-miR167i-5p	gnl|ZmGDB|GRMZM2G042623_T01	3	17.536	1	21	1006	1027	UGAAGCUGCCAGCA-UGAUCUG	CAGAUUAAUGCUGGCAGUUUCA	Cleavage	seq=cds; coord=8:134370592..134377931:1; parent_gene=GRMZM2G042623	1
zma-miR167i-5p	gnl|ZmGDB|GRMZM2G363338_T01	3	17.457	1	21	834	854	UGAAGCUGCCAGCAUGAUCUG	CACAUCAUGGUGGCGGCUUUA	Cleavage	seq=cds; coord=8:117799130..117801199:1; parent_gene=GRMZM2G363338	1
zma-miR168a-5p	gnl|ZmGDB|GRMZM2G361518_T01	3	23.803	1	20	279	298	UCGCUUGGUGCAGAUCGGGA	UCCCGAGCUGCGCCAAGCAA	Cleavage	seq=cds; coord=5:64763204..64768932:1; parent_gene=GRMZM2G361518	1
zma-miR168a-5p	gnl|ZmGDB|GRMZM2G702086_T01	3	17.681	1	20	12	31	UCGCUUGGUGCAGAUCGGGA	UUCCGAUCUCCAGCAAGCGG	Translation	seq=cds; coord=5:182494518..182494968:-1; parent_gene=GRMZM2G702086	1
zma-miR168a-5p	gnl|ZmGDB|AC203041.3_FGT001	3	17.681	1	20	12	31	UCGCUUGGUGCAGAUCGGGA	UUCCGAUCUCCAGCAAGCGG	Translation	seq=cds; coord=5:182570889..182571339:-1; parent_gene=AC203041.3_FG001	1
zma-miR168a-5p	gnl|ZmGDB|GRMZM2G702088_T01	3	15.949	1	20	12	31	UCGCUUGGUGCAGAUCGGGA	UUCCGAUCUCCAGCAAGCGG	Translation	seq=cds; coord=5:182557712..182558162:-1; parent_gene=GRMZM2G702088	1
zma-miR168a-5p	gnl|ZmGDB|GRMZM2G045128_T01	3	11.643	1	20	112	131	UCGCUUGGUGCAGAUCGGGA	UCUCUAUCUGCCCCAAGUGA	Translation	seq=cds; coord=3:192496985..192504121:-1; parent_gene=GRMZM2G045128	1
zma-miR168b-5p	gnl|ZmGDB|GRMZM2G361518_T01	3	23.803	1	20	279	298	UCGCUUGGUGCAGAUCGGGA	UCCCGAGCUGCGCCAAGCAA	Cleavage	seq=cds; coord=5:64763204..64768932:1; parent_gene=GRMZM2G361518	1
zma-miR168b-5p	gnl|ZmGDB|GRMZM2G702086_T01	3	17.681	1	20	12	31	UCGCUUGGUGCAGAUCGGGA	UUCCGAUCUCCAGCAAGCGG	Translation	seq=cds; coord=5:182494518..182494968:-1; parent_gene=GRMZM2G702086	1
zma-miR168b-5p	gnl|ZmGDB|AC203041.3_FGT001	3	17.681	1	20	12	31	UCGCUUGGUGCAGAUCGGGA	UUCCGAUCUCCAGCAAGCGG	Translation	seq=cds; coord=5:182570889..182571339:-1; parent_gene=AC203041.3_FG001	1
zma-miR168b-5p	gnl|ZmGDB|GRMZM2G702088_T01	3	15.949	1	20	12	31	UCGCUUGGUGCAGAUCGGGA	UUCCGAUCUCCAGCAAGCGG	Translation	seq=cds; coord=5:182557712..182558162:-1; parent_gene=GRMZM2G702088	1
zma-miR168b-5p	gnl|ZmGDB|GRMZM2G045128_T01	3	11.643	1	20	112	131	UCGCUUGGUGCAGAUCGGGA	UCUCUAUCUGCCCCAAGUGA	Translation	seq=cds; coord=3:192496985..192504121:-1; parent_gene=GRMZM2G045128	1
zma-miR169c-5p	gnl|ZmGDB|GRMZM2G078124_T01	2	18.351	1	21	282	302	CAGCCAAGGAUGACUUGCCGG	CAGGCAAGUCAUCCUUGGCUA	Cleavage	seq=cds; coord=2:192698625..192701211:-1; parent_gene=GRMZM2G078124	1
zma-miR169c-5p	gnl|ZmGDB|GRMZM5G848857_T01	3	18.83	1	20	154	173	CAGCCAAGGAUGACUUGCCG	CAGCAAGUCAUCCUUUGUUG	Cleavage	seq=cds; coord=3:70673394..70675245:-1; parent_gene=GRMZM5G848857	1
zma-miR169c-3p	gnl|ZmGDB|AC197427.3_FGT003	2	21.029	1	22	823	844	GGCAAGUCUGUCCUUGGCUACA	UGGAGUCAAGGACAGAUUUGCC	Cleavage	seq=cds; coord=4:206165635..206169362:1; parent_gene=AC197427.3_FG003	1
zma-miR169c-3p	gnl|ZmGDB|AC198371.3_FGT007	2.5	18.164	1	20	154	173	GGCAAGUCUGUCCUUGGCUA	UGGUUAAGCACAGACUUGCC	Cleavage	seq=cds; coord=10:5878435..5878998:-1; parent_gene=AC198371.3_FG007	1
zma-miR169c-3p	gnl|ZmGDB|AC199886.3_FGT002	2.5	17.25	1	20	244	263	GGCAAGUCUGUCCUUGGCUA	UGGUUAAGCACAGACUUGCC	Cleavage	seq=cds; coord=7:166704016..166704760:-1; parent_gene=AC199886.3_FG002	1
zma-miR169c-3p	gnl|ZmGDB|GRMZM2G132874_T01	2.5	17.25	1	20	2179	2198	GGCAAGUCUGUCCUUGGCUA	UGGUUAAGCACAGACUUGCC	Cleavage	seq=cds; coord=3:146971283..146974258:1; parent_gene=GRMZM2G132874	1
zma-miR169f-5p	gnl|ZmGDB|GRMZM2G078124_T01	0	18.351	1	20	283	302	UAGCCAAGGAUGACUUGCCU	AGGCAAGUCAUCCUUGGCUA	Cleavage	seq=cds; coord=2:192698625..192701211:-1; parent_gene=GRMZM2G078124	1
zma-miR169f-3p	gnl|ZmGDB|GRMZM2G370521_T01	3	13.617	1	21	363	383	GGCAUGUCUUCCUUGGCUACU	ACUAGCCAAGGAAGAUAUGGC	Cleavage	seq=cds; coord=8:134015774..134017642:1; parent_gene=GRMZM2G370521	1
zma-miR169f-3p	gnl|ZmGDB|GRMZM2G482077_T01	3	16.824	1	21	363	383	GGCAUGUCUUCCUUGGCUACU	ACUAGCCAAGGAAGAUAUGGC	Cleavage	seq=cds; coord=6:160054556..160056340:1; parent_gene=GRMZM2G482077	1
zma-miR169f-3p	gnl|ZmGDB|GRMZM2G417650_T01	3	13.058	1	21	363	383	GGCAUGUCUUCCUUGGCUACU	ACUAGCCAAGGAAGAUAUGGC	Cleavage	seq=cds; coord=5:211803683..211805908:-1; parent_gene=GRMZM2G417650	1
zma-miR169f-3p	gnl|ZmGDB|GRMZM2G409190_T01	3	15.016	1	21	363	383	GGCAUGUCUUCCUUGGCUACU	ACUAGCCAAGGAAGAUAUGGC	Cleavage	seq=cds; coord=5:126694454..126696060:1; parent_gene=GRMZM2G409190	1
zma-miR169f-3p	gnl|ZmGDB|GRMZM2G340976_T01	3	21.28	1	21	931	951	GGCAUGUCUUCCUUGGCUACU	AGUAGUCAAGGACGACGUGCA	Translation	seq=cds; coord=6:15171596..15177250:-1; parent_gene=GRMZM2G340976	1
zma-miR169f-3p	gnl|ZmGDB|AC195860.3_FGT005	3	19.998	1	20	205	224	GGCAUGUCUUCCUUGGCUAC	AUGGCCAAGCAAGACAUGUC	Translation	seq=cds; coord=6:163871992..163873643:1; parent_gene=AC195860.3_FG005	1
zma-miR169f-3p	gnl|ZmGDB|GRMZM2G354593_T01	3	17.918	1	21	1093	1113	GGCAUGUCUUCCUUGGCUACU	AGACGCCAAGGGAGGCAUGCC	Cleavage	seq=cds; coord=6:97263951..97265232:-1; parent_gene=GRMZM2G354593	1
zma-miR169f-3p	gnl|ZmGDB|GRMZM5G869411_T01	3	17.942	1	21	1174	1194	GGCAUGUCUUCCUUGGCUACU	AGACGCCAAGGGAGGCAUGCC	Cleavage	seq=cds; coord=7:131432969..131434254:-1; parent_gene=GRMZM5G869411	1
zma-miR169f-3p	gnl|ZmGDB|GRMZM2G322385_T01	3	17.942	1	21	1174	1194	GGCAUGUCUUCCUUGGCUACU	AGACGCCAAGGGAGGCAUGCC	Cleavage	seq=cds; coord=7:131427877..131429191:-1; parent_gene=GRMZM2G322385	1
zma-miR169f-3p	gnl|ZmGDB|GRMZM2G453251_T01	3	17.942	1	21	1174	1194	GGCAUGUCUUCCUUGGCUACU	AGACGCCAAGGGAGGCAUGCC	Cleavage	seq=cds; coord=2:222450127..222451412:-1; parent_gene=GRMZM2G453251	1
zma-miR169f-3p	gnl|ZmGDB|GRMZM2G346138_T01	3	15.63	1	21	1008	1028	GGCAUGUCUUCCUUGGCUACU	AGUAGCUAUGGAUGACAUGUC	Translation	seq=cds; coord=3:167004322..167008120:1; parent_gene=GRMZM2G346138	1
zma-miR169f-3p	gnl|ZmGDB|GRMZM2G127120_T01	3	17.235	1	21	1915	1935	GGCAUGUCUUCCUUGGCUACU	AGACGCCAAGGGAGGCAUGCC	Cleavage	seq=cds; coord=6:97919597..97923556:1; parent_gene=GRMZM2G127120	1
zma-miR169f-3p	gnl|ZmGDB|GRMZM2G025370_T01	3	17.918	1	21	1993	2013	GGCAUGUCUUCCUUGGCUACU	AGACGCCAAGGGAGGCAUGCC	Cleavage	seq=cds; coord=9:130641519..130644249:1; parent_gene=GRMZM2G025370	1
zma-miR169f-3p	gnl|ZmGDB|GRMZM2G012319_T02	3	17.095	1	21	1892	1912	GGCAUGUCUUCCUUGGCUACU	AGUUGUUAUGGAAGACAUGCC	Cleavage	seq=cds; coord=1:38536443..38548191:1; parent_gene=GRMZM2G012319	1
zma-miR169f-3p	gnl|ZmGDB|GRMZM2G012319_T01	3	17.095	1	21	1952	1972	GGCAUGUCUUCCUUGGCUACU	AGUUGUUAUGGAAGACAUGCC	Cleavage	seq=cds; coord=1:38536341..38547930:1; parent_gene=GRMZM2G012319	1
zma-miR169g	gnl|ZmGDB|GRMZM2G078124_T01	0	18.351	1	20	283	302	UAGCCAAGGAUGACUUGCCU	AGGCAAGUCAUCCUUGGCUA	Cleavage	seq=cds; coord=2:192698625..192701211:-1; parent_gene=GRMZM2G078124	1
zma-miR169h	gnl|ZmGDB|GRMZM2G078124_T01	0	18.351	1	20	283	302	UAGCCAAGGAUGACUUGCCU	AGGCAAGUCAUCCUUGGCUA	Cleavage	seq=cds; coord=2:192698625..192701211:-1; parent_gene=GRMZM2G078124	1
zma-miR169i-5p	gnl|ZmGDB|GRMZM2G078124_T01	0	18.351	1	21	282	302	UAGCCAAGGAUGACUUGCCUG	CAGGCAAGUCAUCCUUGGCUA	Cleavage	seq=cds; coord=2:192698625..192701211:-1; parent_gene=GRMZM2G078124	1
zma-miR169k-5p	gnl|ZmGDB|GRMZM2G078124_T01	0	18.351	1	21	282	302	UAGCCAAGGAUGACUUGCCUG	CAGGCAAGUCAUCCUUGGCUA	Cleavage	seq=cds; coord=2:192698625..192701211:-1; parent_gene=GRMZM2G078124	1
zma-miR169j-5p	gnl|ZmGDB|GRMZM2G078124_T01	0	18.351	1	21	282	302	UAGCCAAGGAUGACUUGCCUG	CAGGCAAGUCAUCCUUGGCUA	Cleavage	seq=cds; coord=2:192698625..192701211:-1; parent_gene=GRMZM2G078124	1
zma-miR169d	gnl|ZmGDB|GRMZM2G034407_T01	1.5	22.063	1	21	122	142	UAGCCAAGGAGACUGCCUAUG	CACGGGCAGUCUCCUUGGCUA	Cleavage	seq=cds; coord=4:47241862..47242858:1; parent_gene=GRMZM2G034407	1
zma-miR169e	gnl|ZmGDB|GRMZM2G034407_T01	2.5	22.063	1	20	123	142	UAGCCAAGGAGACUGCCUAC	ACGGGCAGUCUCCUUGGCUA	Cleavage	seq=cds; coord=4:47241862..47242858:1; parent_gene=GRMZM2G034407	1
zma-miR171c-5p	gnl|ZmGDB|GRMZM2G418916_T02	3	16.15	1	20	831	850	UAUUGGUGCGGUUCAAUCAG	UUGUUUGGAUCGCACCAAUG	Cleavage	seq=cds; coord=5:173108288..173121637:-1; parent_gene=GRMZM2G418916	1
zma-miR171c-5p	gnl|ZmGDB|GRMZM2G418916_T01	3	16.15	1	20	1203	1222	UAUUGGUGCGGUUCAAUCAG	UUGUUUGGAUCGCACCAAUG	Cleavage	seq=cds; coord=5:173108282..173128300:-1; parent_gene=GRMZM2G418916	1
zma-miR171c-5p	gnl|ZmGDB|GRMZM2G056598_T02	3	19.498	1	20	1092	1111	UAUUGGUGCGGUUCAAUCAG	UUGGUUGAAACGGACCAAUA	Translation	seq=cds; coord=5:215781414..215786931:1; parent_gene=GRMZM2G056598	1
zma-miR171c-5p	gnl|ZmGDB|GRMZM2G056598_T01	3	19.498	1	20	1092	1111	UAUUGGUGCGGUUCAAUCAG	UUGGUUGAAACGGACCAAUA	Translation	seq=cds; coord=5:215781414..215787413:1; parent_gene=GRMZM2G056598	1
zma-miR171c-3p	gnl|ZmGDB|GRMZM2G317338_T01	2	23.512	1	21	252	272	UGACUGAGCCGUGCCAAUAUC	GAUAUUGGCGCGGCUCAAUCA	Cleavage	seq=cds; coord=6:2909967..2910502:1; parent_gene=GRMZM2G317338	1
zma-miR171c-3p	gnl|ZmGDB|GRMZM2G098800_T01	2	23.516	1	21	420	440	UGACUGAGCCGUGCCAAUAUC	GAUAUUGGCGCGGCUCAAUCA	Cleavage	seq=cds; coord=4:153196436..153199541:1; parent_gene=GRMZM2G098800	1
zma-miR171c-3p	gnl|ZmGDB|GRMZM2G098800_T02	2	23.516	1	21	1107	1127	UGACUGAGCCGUGCCAAUAUC	GAUAUUGGCGCGGCUCAAUCA	Cleavage	seq=cds; coord=4:153196404..153199186:1; parent_gene=GRMZM2G098800	1
zma-miR171c-3p	gnl|ZmGDB|AC187788.3_FGT008	2.5	22.707	1	21	144	164	UGACUGAGCCGUGCCAAUAUC	GAUAUUGGCGCGGCUCAAUUA	Cleavage	seq=cds; coord=7:165554811..165555298:-1; parent_gene=AC187788.3_FG008	1
zma-miR171j-5p	gnl|ZmGDB|GRMZM2G071502_T01	2.5	18.521	1	20	43	62	UAUUGACGCGGUUCAAUUCG	UGGAUUGAUUCGCGUCAAUA	Cleavage	seq=cds; coord=5:148896609..148896908:-1; parent_gene=GRMZM2G071502	1
zma-miR171j-5p	gnl|ZmGDB|GRMZM2G364296_T01	3	19.727	1	20	43	62	UAUUGACGCGGUUCAAUUCG	CGGAUUGAUUCGGGUCAAUA	Cleavage	seq=cds; coord=7:44726499..44727592:-1; parent_gene=GRMZM2G364296	1
zma-miR171j-5p	gnl|ZmGDB|GRMZM5G800096_T01	3	21.52	1	20	822	841	UAUUGACGCGGUUCAAUUCG	CGGAUUGAUUCGGGUCAAUA	Cleavage	seq=cds; coord=chloroplast:110138..111685:-1; parent_gene=GRMZM5G800096	1
zma-miR171j-3p	gnl|ZmGDB|GRMZM2G317338_T01	0.5	23.512	1	21	252	272	UGAUUGAGCCGUGCCAAUAUC	GAUAUUGGCGCGGCUCAAUCA	Cleavage	seq=cds; coord=6:2909967..2910502:1; parent_gene=GRMZM2G317338	1
zma-miR171j-3p	gnl|ZmGDB|GRMZM2G098800_T01	0.5	23.516	1	21	420	440	UGAUUGAGCCGUGCCAAUAUC	GAUAUUGGCGCGGCUCAAUCA	Cleavage	seq=cds; coord=4:153196436..153199541:1; parent_gene=GRMZM2G098800	1
zma-miR171j-3p	gnl|ZmGDB|GRMZM2G098800_T02	0.5	23.516	1	21	1107	1127	UGAUUGAGCCGUGCCAAUAUC	GAUAUUGGCGCGGCUCAAUCA	Cleavage	seq=cds; coord=4:153196404..153199186:1; parent_gene=GRMZM2G098800	1
zma-miR171j-3p	gnl|ZmGDB|AC187788.3_FGT008	1	22.707	1	21	144	164	UGAUUGAGCCGUGCCAAUAUC	GAUAUUGGCGCGGCUCAAUUA	Cleavage	seq=cds; coord=7:165554811..165555298:-1; parent_gene=AC187788.3_FG008	1
zma-miR171j-3p	gnl|ZmGDB|GRMZM2G477666_T01	2	20.615	1	21	219	239	UGAUUGAGCCGUGCCAAUAUC	GAUAUUGGCGCAGCUCAAUUA	Translation	seq=cds; coord=9:143369964..143371910:-1; parent_gene=GRMZM2G477666	1
zma-miR171e-5p	gnl|ZmGDB|GRMZM2G148518_T02	2.5	16.35	1	20	1103	1122	UGUUGGCUCGGCUCACUCAG	CUGAGGGAGCCGAACCAACA	Cleavage	seq=cds; coord=10:143483468..143486964:-1; parent_gene=GRMZM2G148518	1
zma-miR171e-5p	gnl|ZmGDB|GRMZM2G148518_T01	2.5	16.35	1	20	1103	1122	UGUUGGCUCGGCUCACUCAG	CUGAGGGAGCCGAACCAACA	Cleavage	seq=cds; coord=10:143483122..143486983:-1; parent_gene=GRMZM2G148518	1
zma-miR171e-5p	gnl|ZmGDB|AC199480.3_FGT005	3	14.372	1	20	150	169	UGUUGGCUCGGCUCACUCAG	CUGGGAGAGCCGAGCCACCA	Cleavage	seq=cds; coord=3:219197776..219198288:1; parent_gene=AC199480.3_FG005	1
zma-miR171e-5p	gnl|ZmGDB|GRMZM5G821411_T01	3	13.146	1	20	362	381	UGUUGGCUCGGCUCACUCAG	CUGAGUUUGCUGAGUCAACA	Cleavage	seq=cds; coord=5:206027378..206028144:1; parent_gene=GRMZM5G821411	1
zma-miR171e-5p	gnl|ZmGDB|GRMZM2G001421_T03	3	24.498	1	20	1326	1345	UGUUGGCUCGGCUCACUCAG	CUGCGUCGGCCGGGCCAACA	Cleavage	seq=cds; coord=8:26345052..26350246:1; parent_gene=GRMZM2G001421	1
zma-miR171e-5p	gnl|ZmGDB|GRMZM2G001421_T02	3	24.498	1	20	1692	1711	UGUUGGCUCGGCUCACUCAG	CUGCGUCGGCCGGGCCAACA	Cleavage	seq=cds; coord=8:26345052..26350246:1; parent_gene=GRMZM2G001421	1
zma-miR171e-5p	gnl|ZmGDB|GRMZM2G001421_T01	3	24.498	1	20	1692	1711	UGUUGGCUCGGCUCACUCAG	CUGCGUCGGCCGGGCCAACA	Cleavage	seq=cds; coord=8:26345052..26350246:1; parent_gene=GRMZM2G001421	1
zma-miR171e-5p	gnl|ZmGDB|GRMZM2G001421_T04	3	24.498	1	20	1833	1852	UGUUGGCUCGGCUCACUCAG	CUGCGUCGGCCGGGCCAACA	Cleavage	seq=cds; coord=8:26345438..26350246:1; parent_gene=GRMZM2G001421	1
zma-miR171e-3p	gnl|ZmGDB|GRMZM2G317338_T01	0.5	23.512	1	21	252	272	UGAUUGAGCCGUGCCAAUAUC	GAUAUUGGCGCGGCUCAAUCA	Cleavage	seq=cds; coord=6:2909967..2910502:1; parent_gene=GRMZM2G317338	1
zma-miR171e-3p	gnl|ZmGDB|GRMZM2G098800_T01	0.5	23.516	1	21	420	440	UGAUUGAGCCGUGCCAAUAUC	GAUAUUGGCGCGGCUCAAUCA	Cleavage	seq=cds; coord=4:153196436..153199541:1; parent_gene=GRMZM2G098800	1
zma-miR171e-3p	gnl|ZmGDB|GRMZM2G098800_T02	0.5	23.516	1	21	1107	1127	UGAUUGAGCCGUGCCAAUAUC	GAUAUUGGCGCGGCUCAAUCA	Cleavage	seq=cds; coord=4:153196404..153199186:1; parent_gene=GRMZM2G098800	1
zma-miR171e-3p	gnl|ZmGDB|AC187788.3_FGT008	1	22.707	1	21	144	164	UGAUUGAGCCGUGCCAAUAUC	GAUAUUGGCGCGGCUCAAUUA	Cleavage	seq=cds; coord=7:165554811..165555298:-1; parent_gene=AC187788.3_FG008	1
zma-miR171e-3p	gnl|ZmGDB|GRMZM2G477666_T01	2	20.615	1	21	219	239	UGAUUGAGCCGUGCCAAUAUC	GAUAUUGGCGCAGCUCAAUUA	Translation	seq=cds; coord=9:143369964..143371910:-1; parent_gene=GRMZM2G477666	1
zma-miR171i-3p	gnl|ZmGDB|GRMZM2G317338_T01	0.5	23.512	1	21	252	272	UGAUUGAGCCGUGCCAAUAUC	GAUAUUGGCGCGGCUCAAUCA	Cleavage	seq=cds; coord=6:2909967..2910502:1; parent_gene=GRMZM2G317338	1
zma-miR171i-3p	gnl|ZmGDB|GRMZM2G098800_T01	0.5	23.516	1	21	420	440	UGAUUGAGCCGUGCCAAUAUC	GAUAUUGGCGCGGCUCAAUCA	Cleavage	seq=cds; coord=4:153196436..153199541:1; parent_gene=GRMZM2G098800	1
zma-miR171i-3p	gnl|ZmGDB|GRMZM2G098800_T02	0.5	23.516	1	21	1107	1127	UGAUUGAGCCGUGCCAAUAUC	GAUAUUGGCGCGGCUCAAUCA	Cleavage	seq=cds; coord=4:153196404..153199186:1; parent_gene=GRMZM2G098800	1
zma-miR171i-3p	gnl|ZmGDB|AC187788.3_FGT008	1	22.707	1	21	144	164	UGAUUGAGCCGUGCCAAUAUC	GAUAUUGGCGCGGCUCAAUUA	Cleavage	seq=cds; coord=7:165554811..165555298:-1; parent_gene=AC187788.3_FG008	1
zma-miR171i-3p	gnl|ZmGDB|GRMZM2G477666_T01	2	20.615	1	21	219	239	UGAUUGAGCCGUGCCAAUAUC	GAUAUUGGCGCAGCUCAAUUA	Translation	seq=cds; coord=9:143369964..143371910:-1; parent_gene=GRMZM2G477666	1
zma-miR171g-5p	gnl|ZmGDB|GRMZM2G353885_T01	3	22.295	1	21	364	384	UAUUGACUUGGCUCAUCUCUC	GAGAGAUCAAUCAAGUCAAUG	Cleavage	seq=cds; coord=7:110684867..110688746:-1; parent_gene=GRMZM2G353885	1
zma-miR171g-5p	gnl|ZmGDB|AC204328.3_FGT009	3	20.567	1	20	244	263	UAUUGACUUGGCUCAUCUCU	GGAGAUGGGUCUGGUCAAUA	Translation	seq=cds; coord=3:194722501..194723036:1; parent_gene=AC204328.3_FG009	1
zma-miR171g-5p	gnl|ZmGDB|GRMZM2G033108_T01	3	21.687	1	20	1171	1190	UAUUGACUUGGCUCAUCUCU	GGAGAUGGGUCUGGUCAAUA	Translation	seq=cds; coord=7:103673141..103678619:1; parent_gene=GRMZM2G033108	1
zma-miR172e	gnl|ZmGDB|GRMZM2G416725_T01	1	16.96	1	20	129	148	GGAAUCUUGAUGAUGCUGCA	UGCAGCAUCAUCAGGAUUCU	Cleavage	seq=cds; coord=6:29013673..29014420:1; parent_gene=GRMZM2G416725	1
zma-miR172e	gnl|ZmGDB|GRMZM5G862109_T02	1	23.824	1	20	867	886	GGAAUCUUGAUGAUGCUGCA	UGCAGCAUCAUCAGGAUUCU	Cleavage	seq=cds; coord=1:292889740..292893983:1; parent_gene=GRMZM5G862109	1
zma-miR172e	gnl|ZmGDB|GRMZM5G862109_T01	1	23.824	1	20	1191	1210	GGAAUCUUGAUGAUGCUGCA	UGCAGCAUCAUCAGGAUUCU	Cleavage	seq=cds; coord=1:292889740..292893983:1; parent_gene=GRMZM5G862109	1
zma-miR172e	gnl|ZmGDB|GRMZM2G700665_T02	1	21.238	1	20	1248	1267	GGAAUCUUGAUGAUGCUGCA	UGCAGCAUCAUCAGGAUUCU	Cleavage	seq=cds; coord=8:132044001..132047428:1; parent_gene=GRMZM2G700665	1
zma-miR172e	gnl|ZmGDB|GRMZM2G700665_T03	1	21.238	1	20	1293	1312	GGAAUCUUGAUGAUGCUGCA	UGCAGCAUCAUCAGGAUUCU	Cleavage	seq=cds; coord=8:132044001..132047428:1; parent_gene=GRMZM2G700665	1
zma-miR172e	gnl|ZmGDB|GRMZM2G176175_T01	1	16.235	1	20	1467	1486	GGAAUCUUGAUGAUGCUGCA	UGCAGCAUCAUCAGGAUUCU	Cleavage	seq=cds; coord=7:22004372..22015553:1; parent_gene=GRMZM2G176175	1
zma-miR172e	gnl|ZmGDB|GRMZM2G176175_T02	1	16.235	1	20	1470	1489	GGAAUCUUGAUGAUGCUGCA	UGCAGCAUCAUCAGGAUUCU	Cleavage	seq=cds; coord=7:22004372..22015553:1; parent_gene=GRMZM2G176175	1
zma-miR172e	gnl|ZmGDB|GRMZM2G076602_T01	1.5	16.771	1	20	693	712	GGAAUCUUGAUGAUGCUGCA	UGCAGCAUCAUCACGAUUCC	Cleavage	seq=cds; coord=10:145350317..145352828:1; parent_gene=GRMZM2G076602	1
zma-miR172e	gnl|ZmGDB|GRMZM2G174784_T01	1.5	15.498	1	20	1383	1402	GGAAUCUUGAUGAUGCUGCA	UGCAGCAUCAUCACGAUUCC	Cleavage	seq=cds; coord=2:5514479..5518846:-1; parent_gene=GRMZM2G174784	1
zma-miR172e	gnl|ZmGDB|GRMZM5G856084_T01	2.5	14.618	1	21	206	226	GGAAUCUUGAUGAUGCUGCAU	AUGUACCAUCGUCAAGAUUUC	Cleavage	seq=cds; coord=10:82046176..82050508:-1; parent_gene=GRMZM5G856084	1
zma-miR172e	gnl|ZmGDB|GRMZM2G469304_T01	2.5	23.535	1	21	47	67	GGAAUCUUGAUGAUGCUGCAU	GUGCAGCACCAUCAGGAUUCA	Cleavage	seq=cds; coord=1:28961031..28964979:-1; parent_gene=GRMZM2G469304	1
zma-miR172e	gnl|ZmGDB|GRMZM5G803935_T01	3	21.171	1	20	205	224	GGAAUCUUGAUGAUGCUGCA	AGUGGCAUCAUCAAGAUUCA	Cleavage	seq=cds; coord=3:144884032..144884741:1; parent_gene=GRMZM5G803935	1
zma-miR172e	gnl|ZmGDB|GRMZM2G423956_T04	2.5	22.173	1	20	980	999	GGAAUCUUGAUGAUGCUGCA	UGCAGCAUUGUCCAGAUUCU	Cleavage	seq=cds; coord=6:1335084..1338778:1; parent_gene=GRMZM2G423956	1
zma-miR172e	gnl|ZmGDB|GRMZM2G423956_T03	2.5	22.173	1	20	1487	1506	GGAAUCUUGAUGAUGCUGCA	UGCAGCAUUGUCCAGAUUCU	Cleavage	seq=cds; coord=6:1335084..1338778:1; parent_gene=GRMZM2G423956	1
zma-miR172e	gnl|ZmGDB|GRMZM2G423956_T01	2.5	22.173	1	20	1487	1506	GGAAUCUUGAUGAUGCUGCA	UGCAGCAUUGUCCAGAUUCU	Cleavage	seq=cds; coord=6:1334626..1338778:1; parent_gene=GRMZM2G423956	1
zma-miR172e	gnl|ZmGDB|GRMZM2G423956_T02	2.5	22.173	1	20	1487	1506	GGAAUCUUGAUGAUGCUGCA	UGCAGCAUUGUCCAGAUUCU	Cleavage	seq=cds; coord=6:1334626..1338778:1; parent_gene=GRMZM2G423956	1
zma-miR172e	gnl|ZmGDB|GRMZM2G149977_T01	3	22.225	1	21	72	92	GGAAUCUUGAUGAUGCUGCAU	AUGCAGAAAUAUCGAGAUUCC	Cleavage	seq=cds; coord=5:170419737..170421831:1; parent_gene=GRMZM2G149977	1
zma-miR172e	gnl|ZmGDB|GRMZM2G061980_T02	3	18.163	1	20	557	576	GGAAUCUUGAUGAUGCUGCA	GGCAGCAUCUUCAAGGUUUC	Translation	seq=cds; coord=6:135452271..135465474:1; parent_gene=GRMZM2G061980	1
zma-miR172e	gnl|ZmGDB|GRMZM2G061980_T01	3	18.163	1	20	557	576	GGAAUCUUGAUGAUGCUGCA	GGCAGCAUCUUCAAGGUUUC	Translation	seq=cds; coord=6:135452271..135467313:1; parent_gene=GRMZM2G061980	1
zma-miR166l-5p	gnl|ZmGDB|GRMZM2G008202_T03	2.5	16.723	1	20	125	144	GAAUGGAGGCUGGUCCAAGA	UCUUGGUCCAGCCUCCACUC	Cleavage	seq=cds; coord=6:46775079..46777201:1; parent_gene=GRMZM2G008202	1
zma-miR166l-5p	gnl|ZmGDB|GRMZM5G844029_T01	3	12.861	1	20	60	79	GAAUGGAGGCUGGUCCAAGA	UUUUAGAUCAGCCUCCAUUG	Cleavage	seq=cds; coord=1:276204694..276205125:-1; parent_gene=GRMZM5G844029	1
zma-miR166l-5p	gnl|ZmGDB|AC197440.3_FGT005	3	19.741	1	20	1488	1507	GAAUGGAGGCUGGUCCAAGA	UGUUGGAUCAGUCUCUGUUC	Cleavage	seq=cds; coord=5:72409616..72412107:1; parent_gene=AC197440.3_FG005	1
zma-miR166l-5p	gnl|ZmGDB|GRMZM2G093490_T01	2.5	19.8	1	20	1452	1470	GAAUGGAGGCUGGUCCAAGA	UCUUGGAC-AGCUUCCAUUC	Cleavage	seq=cds; coord=5:80795990..80800856:-1; parent_gene=GRMZM2G093490	1
zma-miR166l-3p	gnl|ZmGDB|AC208827.3_FGT002	1	16.209	1	20	268	287	UCGGACCAGGCUUCAUUCCU	AGGAAUGCAGCCUGGUCCGA	Cleavage	seq=cds; coord=10:47167600..47168316:-1; parent_gene=AC208827.3_FG002	1
zma-miR166l-3p	gnl|ZmGDB|GRMZM2G109987_T04	2	24.232	1	20	573	592	UCGGACCAGGCUUCAUUCCU	UGGGAUGAAGCCUGGUCCGG	Cleavage	seq=cds; coord=9:154645740..154650601:-1; parent_gene=GRMZM2G109987	1
zma-miR166l-3p	gnl|ZmGDB|GRMZM2G042250_T04	2	23.534	1	20	564	583	UCGGACCAGGCUUCAUUCCU	UGGGAUGAAGCCUGGUCCGG	Cleavage	seq=cds; coord=1:2793728..2798869:1; parent_gene=GRMZM2G042250	1
zma-miR166l-3p	gnl|ZmGDB|GRMZM2G469551_T02	2	19.005	1	20	543	562	UCGGACCAGGCUUCAUUCCU	UGGGAUGAAGCCUGGUCCGG	Cleavage	seq=cds; coord=1:230535887..230547084:-1; parent_gene=GRMZM2G469551	1
zma-miR166l-3p	gnl|ZmGDB|GRMZM2G003509_T02	2	21.178	1	20	45	64	UCGGACCAGGCUUCAUUCCU	UGGGAUGAAGCCUGGUCCGG	Cleavage	seq=cds; coord=1:173233523..173239064:-1; parent_gene=GRMZM2G003509	1
zma-miR166l-3p	gnl|ZmGDB|GRMZM2G109987_T01	2	24.232	1	20	573	592	UCGGACCAGGCUUCAUUCCU	UGGGAUGAAGCCUGGUCCGG	Cleavage	seq=cds; coord=9:154642336..154650601:-1; parent_gene=GRMZM2G109987	1
zma-miR166l-3p	gnl|ZmGDB|GRMZM2G109987_T03	2	24.232	1	20	573	592	UCGGACCAGGCUUCAUUCCU	UGGGAUGAAGCCUGGUCCGG	Cleavage	seq=cds; coord=9:154642336..154650601:-1; parent_gene=GRMZM2G109987	1
zma-miR166l-3p	gnl|ZmGDB|GRMZM2G469551_T01	2	19.005	1	20	543	562	UCGGACCAGGCUUCAUUCCU	UGGGAUGAAGCCUGGUCCGG	Cleavage	seq=cds; coord=1:230535106..230547084:-1; parent_gene=GRMZM2G469551	1
zma-miR166l-3p	gnl|ZmGDB|GRMZM2G042250_T01	2	23.534	1	20	564	583	UCGGACCAGGCUUCAUUCCU	UGGGAUGAAGCCUGGUCCGG	Cleavage	seq=cds; coord=1:2793728..2800641:1; parent_gene=GRMZM2G042250	1
zma-miR166l-3p	gnl|ZmGDB|GRMZM2G042250_T02	2	23.534	1	20	564	583	UCGGACCAGGCUUCAUUCCU	UGGGAUGAAGCCUGGUCCGG	Cleavage	seq=cds; coord=1:2793950..2800638:1; parent_gene=GRMZM2G042250	1
zma-miR166l-3p	gnl|ZmGDB|GRMZM2G109987_T02	2	24.232	1	20	573	592	UCGGACCAGGCUUCAUUCCU	UGGGAUGAAGCCUGGUCCGG	Cleavage	seq=cds; coord=9:154642336..154650601:-1; parent_gene=GRMZM2G109987	1
zma-miR166l-3p	gnl|ZmGDB|GRMZM2G109987_T05	2	24.232	1	20	573	592	UCGGACCAGGCUUCAUUCCU	UGGGAUGAAGCCUGGUCCGG	Cleavage	seq=cds; coord=9:154642733..154649986:-1; parent_gene=GRMZM2G109987	1
zma-miR166l-3p	gnl|ZmGDB|GRMZM2G003509_T01	2	21.036	1	20	588	607	UCGGACCAGGCUUCAUUCCU	UGGGAUGAAGCCUGGUCCGG	Cleavage	seq=cds; coord=1:173233037..173239064:-1; parent_gene=GRMZM2G003509	1
zma-miR166l-3p	gnl|ZmGDB|AC187157.4_FGT005	2	23.173	1	20	564	583	UCGGACCAGGCUUCAUUCCU	CGGGAUGAAGCCUGGUCCGG	Cleavage	seq=cds; coord=8:22640866..22645283:-1; parent_gene=AC187157.4_FG005	1
zma-miR166l-3p	gnl|ZmGDB|GRMZM2G042250_T03	2	23.534	1	20	564	583	UCGGACCAGGCUUCAUUCCU	UGGGAUGAAGCCUGGUCCGG	Cleavage	seq=cds; coord=1:2793728..2800614:1; parent_gene=GRMZM2G042250	1
zma-miR166l-3p	gnl|ZmGDB|GRMZM2G178102_T01	2	20.931	1	20	882	901	UCGGACCAGGCUUCAUUCCU	UGGGAUGAAGCCUGGUCCGG	Cleavage	seq=cds; coord=3:123263423..123270240:-1; parent_gene=GRMZM2G178102	1
zma-miR166l-3p	gnl|ZmGDB|GRMZM2G006062_T01	2.5	22.975	1	20	108	127	UCGGACCAGGCUUCAUUCCU	UGGGAUGAAGCUUGGUCCGG	Cleavage	seq=cds; coord=4:169430032..169431340:1; parent_gene=GRMZM2G006062	1
zma-miR166l-3p	gnl|ZmGDB|GRMZM2G552083_T01	2.5	19.564	1	20	546	565	UCGGACCAGGCUUCAUUCCU	UGGGAUGGAGCCUGGUCCGG	Cleavage	seq=cds; coord=10:142904755..142908069:1; parent_gene=GRMZM2G552083	1
zma-miR166l-3p	gnl|ZmGDB|GRMZM2G336718_T01	2.5	19.552	1	20	45	64	UCGGACCAGGCUUCAUUCCU	UGGGAUGGAGCCUGGUCCGG	Cleavage	seq=cds; coord=10:102279782..102283839:1; parent_gene=GRMZM2G336718	1
zma-miR166l-3p	gnl|ZmGDB|GRMZM2G123644_T01	2.5	19.564	1	20	546	565	UCGGACCAGGCUUCAUUCCU	UGGGAUGGAGCCUGGUCCGG	Cleavage	seq=cds; coord=10:71608833..71613973:1; parent_gene=GRMZM2G123644	1
zma-miR166l-3p	gnl|ZmGDB|AC206425.3_FGT004	3	19.127	1	21	591	611	UCGGACCAGGCUUCAUUCCUC	GAGGUAUGAAGUCUGGUCCAA	Cleavage	seq=cds; coord=3:131847059..131848547:1; parent_gene=AC206425.3_FG004	1
zma-miR166l-3p	gnl|ZmGDB|GRMZM2G008359_T01	3	19.127	1	21	591	611	UCGGACCAGGCUUCAUUCCUC	GAGGUAUGAAGUCUGGUCCAA	Cleavage	seq=cds; coord=9:107072818..107074306:-1; parent_gene=GRMZM2G008359	1
zma-miR166l-3p	gnl|ZmGDB|GRMZM2G038198_T01	3	17.689	1	20	486	505	UCGGACCAGGCUUCAUUCCU	UGAGAUGAAGCCUGGUCCGG	Cleavage	seq=cds; coord=10:39623082..39627688:-1; parent_gene=GRMZM2G038198	1
zma-miR166m-5p	gnl|ZmGDB|GRMZM2G021277_T01	3	19.982	1	21	678	698	GGAAUGUUGGCUGGCUCGAGG	CUUCGACCCGGCCAACAUUCG	Cleavage	seq=cds; coord=10:82848693..82850823:-1; parent_gene=GRMZM2G021277	1
zma-miR166m-5p	gnl|ZmGDB|GRMZM2G466358_T01	2.5	11.417	1	20	161	180	GGAAUGUUGGCUGGCUCGAG	AUCGAGACAGCCAACAUUUC	Cleavage	seq=cds; coord=5:217634811..217635767:-1; parent_gene=GRMZM2G466358	1
zma-miR166m-5p	gnl|ZmGDB|GRMZM2G450937_T07	3	22.588	1	21	2396	2416	GGAAUGUUGGCUGGCUCGAGG	CUUCGAGCCAGUCCGCGUUCC	Cleavage	seq=cds; coord=4:237308078..237314176:1; parent_gene=GRMZM2G450937	1
zma-miR166m-5p	gnl|ZmGDB|GRMZM2G455197_T01	2.5	10.985	1	20	161	180	GGAAUGUUGGCUGGCUCGAG	AUCGAGACAGCCAACAUUUC	Cleavage	seq=cds; coord=9:19215467..19216916:-1; parent_gene=GRMZM2G455197	1
zma-miR166m-5p	gnl|ZmGDB|GRMZM2G336087_T01	2.5	11.585	1	20	161	180	GGAAUGUUGGCUGGCUCGAG	AUCGAGACAGCCAACAUUUC	Cleavage	seq=cds; coord=5:195558760..195561571:1; parent_gene=GRMZM2G336087	1
zma-miR166m-5p	gnl|ZmGDB|GRMZM2G471562_T01	2.5	10.206	1	20	161	180	GGAAUGUUGGCUGGCUCGAG	AUCGAGACAGCCAACAUUUC	Cleavage	seq=cds; coord=3:126782655..126788473:-1; parent_gene=GRMZM2G471562	1
zma-miR166m-5p	gnl|ZmGDB|GRMZM2G340739_T01	2.5	10.912	1	20	314	333	GGAAUGUUGGCUGGCUCGAG	AUCGAGACAGCCAACAUUUC	Cleavage	seq=cds; coord=1:244272796..244285637:-1; parent_gene=GRMZM2G340739	1
zma-miR166m-5p	gnl|ZmGDB|GRMZM2G369243_T01	2.5	15.005	1	20	161	180	GGAAUGUUGGCUGGCUCGAG	AUCGAGACAGCCAACAUUUC	Cleavage	seq=cds; coord=2:78007553..78019794:-1; parent_gene=GRMZM2G369243	1
zma-miR166m-5p	gnl|ZmGDB|GRMZM2G337905_T02	2.5	12.281	1	20	161	180	GGAAUGUUGGCUGGCUCGAG	AUCGAGACAGCCAACAUUUC	Cleavage	seq=cds; coord=6:3436917..3457041:-1; parent_gene=GRMZM2G337905	1
zma-miR166m-5p	gnl|ZmGDB|GRMZM2G337905_T01	2.5	12.281	1	20	161	180	GGAAUGUUGGCUGGCUCGAG	AUCGAGACAGCCAACAUUUC	Cleavage	seq=cds; coord=6:3434798..3457041:-1; parent_gene=GRMZM2G337905	1
zma-miR166m-5p	gnl|ZmGDB|GRMZM2G326851_T01	3	22.56	1	21	1010	1030	GGAAUGUUGGCUGGCUCGAGG	CUUCGAGCCAGGCCACGUUCC	Translation	seq=cds; coord=10:125298128..125300187:1; parent_gene=GRMZM2G326851	1
zma-miR166m-5p	gnl|ZmGDB|GRMZM2G001934_T02	3	13.344	1	21	48	68	GGAAUGUUGGCUGGCUCGAGG	UCUCAAGUCAGCGAACAUUCU	Translation	seq=cds; coord=10:148874605..148876544:-1; parent_gene=GRMZM2G001934	1
zma-miR166m-5p	gnl|ZmGDB|GRMZM2G495837_T01	3	8.913	1	21	448	468	GGAAUGUUGGCUGGCUCGAGG	UUUCGAGACAGACAACAUUUC	Translation	seq=cds; coord=7:68313629..68317632:1; parent_gene=GRMZM2G495837	1
zma-miR166m-5p	gnl|ZmGDB|GRMZM2G137820_T03	3	9.639	1	21	334	354	GGAAUGUUGGCUGGCUCGAGG	UUUCGAGACAGACAACAUUUC	Translation	seq=cds; coord=6:128663003..128666516:1; parent_gene=GRMZM2G137820	1
zma-miR166m-3p	gnl|ZmGDB|AC208827.3_FGT002	1	16.209	1	20	268	287	UCGGACCAGGCUUCAUUCCU	AGGAAUGCAGCCUGGUCCGA	Cleavage	seq=cds; coord=10:47167600..47168316:-1; parent_gene=AC208827.3_FG002	1
zma-miR166m-3p	gnl|ZmGDB|GRMZM2G109987_T04	2	24.232	1	20	573	592	UCGGACCAGGCUUCAUUCCU	UGGGAUGAAGCCUGGUCCGG	Cleavage	seq=cds; coord=9:154645740..154650601:-1; parent_gene=GRMZM2G109987	1
zma-miR166m-3p	gnl|ZmGDB|GRMZM2G042250_T04	2	23.534	1	20	564	583	UCGGACCAGGCUUCAUUCCU	UGGGAUGAAGCCUGGUCCGG	Cleavage	seq=cds; coord=1:2793728..2798869:1; parent_gene=GRMZM2G042250	1
zma-miR166m-3p	gnl|ZmGDB|GRMZM2G469551_T02	2	19.005	1	20	543	562	UCGGACCAGGCUUCAUUCCU	UGGGAUGAAGCCUGGUCCGG	Cleavage	seq=cds; coord=1:230535887..230547084:-1; parent_gene=GRMZM2G469551	1
zma-miR166m-3p	gnl|ZmGDB|GRMZM2G003509_T02	2	21.178	1	20	45	64	UCGGACCAGGCUUCAUUCCU	UGGGAUGAAGCCUGGUCCGG	Cleavage	seq=cds; coord=1:173233523..173239064:-1; parent_gene=GRMZM2G003509	1
zma-miR166m-3p	gnl|ZmGDB|GRMZM2G109987_T01	2	24.232	1	20	573	592	UCGGACCAGGCUUCAUUCCU	UGGGAUGAAGCCUGGUCCGG	Cleavage	seq=cds; coord=9:154642336..154650601:-1; parent_gene=GRMZM2G109987	1
zma-miR166m-3p	gnl|ZmGDB|GRMZM2G109987_T03	2	24.232	1	20	573	592	UCGGACCAGGCUUCAUUCCU	UGGGAUGAAGCCUGGUCCGG	Cleavage	seq=cds; coord=9:154642336..154650601:-1; parent_gene=GRMZM2G109987	1
zma-miR166m-3p	gnl|ZmGDB|GRMZM2G469551_T01	2	19.005	1	20	543	562	UCGGACCAGGCUUCAUUCCU	UGGGAUGAAGCCUGGUCCGG	Cleavage	seq=cds; coord=1:230535106..230547084:-1; parent_gene=GRMZM2G469551	1
zma-miR166m-3p	gnl|ZmGDB|GRMZM2G042250_T01	2	23.534	1	20	564	583	UCGGACCAGGCUUCAUUCCU	UGGGAUGAAGCCUGGUCCGG	Cleavage	seq=cds; coord=1:2793728..2800641:1; parent_gene=GRMZM2G042250	1
zma-miR166m-3p	gnl|ZmGDB|GRMZM2G042250_T02	2	23.534	1	20	564	583	UCGGACCAGGCUUCAUUCCU	UGGGAUGAAGCCUGGUCCGG	Cleavage	seq=cds; coord=1:2793950..2800638:1; parent_gene=GRMZM2G042250	1
zma-miR166m-3p	gnl|ZmGDB|GRMZM2G109987_T02	2	24.232	1	20	573	592	UCGGACCAGGCUUCAUUCCU	UGGGAUGAAGCCUGGUCCGG	Cleavage	seq=cds; coord=9:154642336..154650601:-1; parent_gene=GRMZM2G109987	1
zma-miR166m-3p	gnl|ZmGDB|GRMZM2G109987_T05	2	24.232	1	20	573	592	UCGGACCAGGCUUCAUUCCU	UGGGAUGAAGCCUGGUCCGG	Cleavage	seq=cds; coord=9:154642733..154649986:-1; parent_gene=GRMZM2G109987	1
zma-miR166m-3p	gnl|ZmGDB|GRMZM2G003509_T01	2	21.036	1	20	588	607	UCGGACCAGGCUUCAUUCCU	UGGGAUGAAGCCUGGUCCGG	Cleavage	seq=cds; coord=1:173233037..173239064:-1; parent_gene=GRMZM2G003509	1
zma-miR166m-3p	gnl|ZmGDB|AC187157.4_FGT005	2	23.173	1	20	564	583	UCGGACCAGGCUUCAUUCCU	CGGGAUGAAGCCUGGUCCGG	Cleavage	seq=cds; coord=8:22640866..22645283:-1; parent_gene=AC187157.4_FG005	1
zma-miR166m-3p	gnl|ZmGDB|GRMZM2G042250_T03	2	23.534	1	20	564	583	UCGGACCAGGCUUCAUUCCU	UGGGAUGAAGCCUGGUCCGG	Cleavage	seq=cds; coord=1:2793728..2800614:1; parent_gene=GRMZM2G042250	1
zma-miR166m-3p	gnl|ZmGDB|GRMZM2G178102_T01	2	20.931	1	20	882	901	UCGGACCAGGCUUCAUUCCU	UGGGAUGAAGCCUGGUCCGG	Cleavage	seq=cds; coord=3:123263423..123270240:-1; parent_gene=GRMZM2G178102	1
zma-miR166m-3p	gnl|ZmGDB|GRMZM2G006062_T01	2.5	22.975	1	20	108	127	UCGGACCAGGCUUCAUUCCU	UGGGAUGAAGCUUGGUCCGG	Cleavage	seq=cds; coord=4:169430032..169431340:1; parent_gene=GRMZM2G006062	1
zma-miR166m-3p	gnl|ZmGDB|GRMZM2G552083_T01	2.5	19.564	1	20	546	565	UCGGACCAGGCUUCAUUCCU	UGGGAUGGAGCCUGGUCCGG	Cleavage	seq=cds; coord=10:142904755..142908069:1; parent_gene=GRMZM2G552083	1
zma-miR166m-3p	gnl|ZmGDB|GRMZM2G336718_T01	2.5	19.552	1	20	45	64	UCGGACCAGGCUUCAUUCCU	UGGGAUGGAGCCUGGUCCGG	Cleavage	seq=cds; coord=10:102279782..102283839:1; parent_gene=GRMZM2G336718	1
zma-miR166m-3p	gnl|ZmGDB|GRMZM2G123644_T01	2.5	19.564	1	20	546	565	UCGGACCAGGCUUCAUUCCU	UGGGAUGGAGCCUGGUCCGG	Cleavage	seq=cds; coord=10:71608833..71613973:1; parent_gene=GRMZM2G123644	1
zma-miR166m-3p	gnl|ZmGDB|AC206425.3_FGT004	3	19.127	1	21	591	611	UCGGACCAGGCUUCAUUCCUC	GAGGUAUGAAGUCUGGUCCAA	Cleavage	seq=cds; coord=3:131847059..131848547:1; parent_gene=AC206425.3_FG004	1
zma-miR166m-3p	gnl|ZmGDB|GRMZM2G008359_T01	3	19.127	1	21	591	611	UCGGACCAGGCUUCAUUCCUC	GAGGUAUGAAGUCUGGUCCAA	Cleavage	seq=cds; coord=9:107072818..107074306:-1; parent_gene=GRMZM2G008359	1
zma-miR166m-3p	gnl|ZmGDB|GRMZM2G038198_T01	3	17.689	1	20	486	505	UCGGACCAGGCUUCAUUCCU	UGAGAUGAAGCCUGGUCCGG	Cleavage	seq=cds; coord=10:39623082..39627688:-1; parent_gene=GRMZM2G038198	1
zma-miR171k-3p	gnl|ZmGDB|GRMZM2G008408_T01	3	14.717	1	21	52	71	GUGAGCCGAACCAAUAUCACU	GGUGAU-UUGGUUUGGUUCAC	Cleavage	seq=cds; coord=9:79416912..79417506:1; parent_gene=GRMZM2G008408	1
zma-miR171h-3p	gnl|ZmGDB|GRMZM2G008408_T01	3	14.717	1	21	52	71	GUGAGCCGAACCAAUAUCACU	GGUGAU-UUGGUUUGGUUCAC	Cleavage	seq=cds; coord=9:79416912..79417506:1; parent_gene=GRMZM2G008408	1
zma-miR393a-5p	gnl|ZmGDB|GRMZM2G135978_T01	2	18.848	1	20	1551	1570	UCCAAAGGGAUCGCAUUGAU	GACAAUGCGAUCCCUUUGGA	Cleavage	seq=cds; coord=8:127112957..127118492:-1; parent_gene=GRMZM2G135978	1
zma-miR393a-5p	gnl|ZmGDB|GRMZM2G137451_T02	2	19.041	1	20	1500	1519	UCCAAAGGGAUCGCAUUGAU	CACAAUGCGAUCCCUUUGGA	Cleavage	seq=cds; coord=10:110996827..111000916:-1; parent_gene=GRMZM2G137451	1
zma-miR393a-5p	gnl|ZmGDB|GRMZM2G137451_T01	2	19.041	1	20	1500	1519	UCCAAAGGGAUCGCAUUGAU	CACAAUGCGAUCCCUUUGGA	Cleavage	seq=cds; coord=10:110996613..111000922:-1; parent_gene=GRMZM2G137451	1
zma-miR393a-5p	gnl|ZmGDB|GRMZM2G036832_T01	3	17.479	1	22	885	906	UCCAAAGGGAUCGCAUUGAUCU	AUAUCAGAGAGAUUCCUUUGGA	Cleavage	seq=cds; coord=2:182619406..182625522:-1; parent_gene=GRMZM2G036832	1
zma-miR393a-5p	gnl|ZmGDB|GRMZM2G036832_T02	3	17.479	1	22	885	906	UCCAAAGGGAUCGCAUUGAUCU	AUAUCAGAGAGAUUCCUUUGGA	Cleavage	seq=cds; coord=2:182619819..182625522:-1; parent_gene=GRMZM2G036832	1
zma-miR393a-3p	gnl|ZmGDB|GRMZM2G417746_T01	2.5	19.853	1	20	433	452	AUCAGUGCAAUCCCUUUGGA	UCCAAAGGGUUUGUGCUGGU	Translation	seq=cds; coord=1:126945132..126947322:-1; parent_gene=GRMZM2G417746	1
zma-miR393a-3p	gnl|ZmGDB|GRMZM2G003640_T07	2.5	22.327	1	22	50	71	AUCAGUGCAAUCCCUUUGGAAU	AGUCCCGAGGGAUAGCACUGAU	Translation	seq=cds; coord=1:256296778..256306481:-1; parent_gene=GRMZM2G003640	1
zma-miR393a-3p	gnl|ZmGDB|GRMZM2G003640_T06	2.5	22.327	1	22	50	71	AUCAGUGCAAUCCCUUUGGAAU	AGUCCCGAGGGAUAGCACUGAU	Translation	seq=cds; coord=1:256296778..256306481:-1; parent_gene=GRMZM2G003640	1
zma-miR393a-3p	gnl|ZmGDB|GRMZM2G003640_T05	2.5	22.327	1	22	50	71	AUCAGUGCAAUCCCUUUGGAAU	AGUCCCGAGGGAUAGCACUGAU	Translation	seq=cds; coord=1:256296778..256306481:-1; parent_gene=GRMZM2G003640	1
zma-miR393a-3p	gnl|ZmGDB|GRMZM2G003640_T04	2.5	22.327	1	22	50	71	AUCAGUGCAAUCCCUUUGGAAU	AGUCCCGAGGGAUAGCACUGAU	Translation	seq=cds; coord=1:256296778..256306481:-1; parent_gene=GRMZM2G003640	1
zma-miR393a-3p	gnl|ZmGDB|GRMZM2G003640_T02	2.5	22.327	1	22	50	71	AUCAGUGCAAUCCCUUUGGAAU	AGUCCCGAGGGAUAGCACUGAU	Translation	seq=cds; coord=1:256296778..256306481:-1; parent_gene=GRMZM2G003640	1
zma-miR393a-3p	gnl|ZmGDB|GRMZM2G003640_T01	2.5	22.327	1	22	50	71	AUCAGUGCAAUCCCUUUGGAAU	AGUCCCGAGGGAUAGCACUGAU	Translation	seq=cds; coord=1:256296778..256306481:-1; parent_gene=GRMZM2G003640	1
zma-miR393a-3p	gnl|ZmGDB|GRMZM2G003640_T03	2.5	22.327	1	22	50	71	AUCAGUGCAAUCCCUUUGGAAU	AGUCCCGAGGGAUAGCACUGAU	Translation	seq=cds; coord=1:256296778..256306481:-1; parent_gene=GRMZM2G003640	1
zma-miR408a	gnl|ZmGDB|AC200188.4_FGT006	3	20.653	1	21	332	352	CUGCACUGCCUCUUCCCUGGC	GCCGUGGAGGAGGUGGUGCAG	Cleavage	seq=cds; coord=4:231992726..231993278:1; parent_gene=AC200188.4_FG006	1
zma-miR408a	gnl|ZmGDB|GRMZM2G138710_T01	3	21.891	1	21	967	987	CUGCACUGCCUCUUCCCUGGC	GCCGGGAAAGAGGCGGUGUGG	Cleavage	seq=cds; coord=1:76154571..76156037:-1; parent_gene=GRMZM2G138710	1
zma-miR408a	gnl|ZmGDB|GRMZM2G106026_T01	3	24.131	1	21	643	663	CUGCACUGCCUCUUCCCUGGC	GCCGAGGAAGAGGAGGUGCAG	Cleavage	seq=cds; coord=1:76461944..76462885:-1; parent_gene=GRMZM2G106026	1
zma-miR156k-5p	gnl|ZmGDB|AC233751.1_FGT002	1	23.513	1	20	1415	1434	UGACAGAAGAGAGCGAGCAC	GUGCUCUCUCUCUUCUGUCA	Cleavage	seq=cds; coord=4:44780143..44784469:-1; parent_gene=AC233751.1_FG002	1
zma-miR156k-5p	gnl|ZmGDB|GRMZM2G097275_T02	1	21.867	1	20	1106	1125	UGACAGAAGAGAGCGAGCAC	GUGCUCUCUCUCUUCUGUCA	Cleavage	seq=cds; coord=5:77940666..77945676:1; parent_gene=GRMZM2G097275	1
zma-miR156k-5p	gnl|ZmGDB|GRMZM2G097275_T03	1	21.867	1	20	1106	1125	UGACAGAAGAGAGCGAGCAC	GUGCUCUCUCUCUUCUGUCA	Cleavage	seq=cds; coord=5:77940666..77945676:1; parent_gene=GRMZM2G097275	1
zma-miR156k-5p	gnl|ZmGDB|GRMZM2G097275_T01	1	21.867	1	20	1106	1125	UGACAGAAGAGAGCGAGCAC	GUGCUCUCUCUCUUCUGUCA	Cleavage	seq=cds; coord=5:77940666..77945714:1; parent_gene=GRMZM2G097275	1
zma-miR156k-5p	gnl|ZmGDB|GRMZM5G878561_T01	1	19.127	1	20	950	969	UGACAGAAGAGAGCGAGCAC	GUGCUCUCUCUCUUCUGUCA	Cleavage	seq=cds; coord=3:159377754..159382446:-1; parent_gene=GRMZM5G878561	1
zma-miR156k-5p	gnl|ZmGDB|GRMZM2G097275_T04	1	21.867	1	20	998	1017	UGACAGAAGAGAGCGAGCAC	GUGCUCUCUCUCUUCUGUCA	Cleavage	seq=cds; coord=5:77940666..77945477:1; parent_gene=GRMZM2G097275	1
zma-miR156k-5p	gnl|ZmGDB|GRMZM2G061734_T01	1	17.452	1	20	941	960	UGACAGAAGAGAGCGAGCAC	GUGCUCUCUCUCUUCUGUCA	Cleavage	seq=cds; coord=2:192157754..192162802:1; parent_gene=GRMZM2G061734	1
zma-miR156k-5p	gnl|ZmGDB|GRMZM2G460544_T01	1	20.772	1	20	848	867	UGACAGAAGAGAGCGAGCAC	GUGCUCUCUCUCUUCUGUCA	Cleavage	seq=cds; coord=4:199278823..199283117:-1; parent_gene=GRMZM2G460544	1
zma-miR156k-5p	gnl|ZmGDB|GRMZM2G126018_T01	1	18.45	1	20	779	798	UGACAGAAGAGAGCGAGCAC	GUGCUCUCUCUCUUCUGUCA	Cleavage	seq=cds; coord=2:189838793..189842695:-1; parent_gene=GRMZM2G126018	1
zma-miR156k-5p	gnl|ZmGDB|GRMZM2G126018_T02	1	18.45	1	20	779	798	UGACAGAAGAGAGCGAGCAC	GUGCUCUCUCUCUUCUGUCA	Cleavage	seq=cds; coord=2:189838915..189842817:-1; parent_gene=GRMZM2G126018	1
zma-miR156k-5p	gnl|ZmGDB|GRMZM2G307588_T01	1	16.689	1	20	764	783	UGACAGAAGAGAGCGAGCAC	GUGCUCUCUCUCUUCUGUCA	Cleavage	seq=cds; coord=7:133170018..133173665:-1; parent_gene=GRMZM2G307588	1
zma-miR156k-5p	gnl|ZmGDB|GRMZM2G106798_T02	1	22.998	1	20	755	774	UGACAGAAGAGAGCGAGCAC	GUGCUCUCUCUCUUCUGUCA	Cleavage	seq=cds; coord=4:17489205..17501119:1; parent_gene=GRMZM2G106798	1
zma-miR156k-5p	gnl|ZmGDB|GRMZM2G106798_T03	1	22.998	1	20	755	774	UGACAGAAGAGAGCGAGCAC	GUGCUCUCUCUCUUCUGUCA	Cleavage	seq=cds; coord=4:17489205..17501119:1; parent_gene=GRMZM2G106798	1
zma-miR156k-5p	gnl|ZmGDB|GRMZM2G106798_T01	1	22.998	1	20	755	774	UGACAGAAGAGAGCGAGCAC	GUGCUCUCUCUCUUCUGUCA	Cleavage	seq=cds; coord=4:17489205..17501119:1; parent_gene=GRMZM2G106798	1
zma-miR156k-3p	gnl|ZmGDB|GRMZM2G052148_T01	3	21.698	1	21	609	629	GCUCGCUUCUCUUUCUGUCAG	CUGGCAGAAAGAGAAGAGAGA	Cleavage	seq=cds; coord=1:59581460..59591624:-1; parent_gene=GRMZM2G052148	1
zma-miR156k-3p	gnl|ZmGDB|GRMZM2G701791_T01	2.5	10.233	1	21	235	255	GCUCGCUUCUCUUUCUGUCAG	CAGAGAGAAAGAGAGGCGAGC	Cleavage	seq=cds; coord=3:144589164..144590368:1; parent_gene=GRMZM2G701791	1
zma-miR156k-3p	gnl|ZmGDB|GRMZM2G123652_T02	3	22.898	1	21	242	262	GCUCGCUUCUCUUUCUGUCAG	UUGACAGGGAGAAAGGCGAGU	Translation	seq=cds; coord=2:147302386..147308828:-1; parent_gene=GRMZM2G123652	1
zma-miR160f-5p	gnl|ZmGDB|GRMZM2G567718_T01	0	12.852	1	21	6	26	UGCCUGGCUCCCUGUAUGCCG	UGGCAUACAGGGAGCCAGGCA	Cleavage	seq=cds; coord=6:9144425..9144859:-1; parent_gene=GRMZM2G567718	1
zma-miR160f-5p	gnl|ZmGDB|GRMZM2G159399_T01	0	21.942	1	20	1315	1334	UGCCUGGCUCCCUGUAUGCC	GGCAUACAGGGAGCCAGGCA	Cleavage	seq=cds; coord=5:27944757..27949513:-1; parent_gene=GRMZM2G159399	1
zma-miR160f-5p	gnl|ZmGDB|AC207656.3_FGT002	0	24.063	1	20	1351	1370	UGCCUGGCUCCCUGUAUGCC	GGCAUACAGGGAGCCAGGCA	Cleavage	seq=cds; coord=5:49253260..49255662:1; parent_gene=AC207656.3_FG002	1
zma-miR160f-5p	gnl|ZmGDB|AC207885.3_FGT009	1	24.092	1	20	484	503	UGCCUGGCUCCCUGUAUGCC	GGCAUACUGGGAGCCAGGCA	Cleavage	seq=cds; coord=2:168321269..168322176:-1; parent_gene=AC207885.3_FG009	1
zma-miR160f-5p	gnl|ZmGDB|GRMZM2G081406_T01	1	22.146	1	20	1372	1391	UGCCUGGCUCCCUGUAUGCC	GCCAUACAGGGAGCCAGGCA	Cleavage	seq=cds; coord=4:143802561..143805351:1; parent_gene=GRMZM2G081406	1
zma-miR160f-5p	gnl|ZmGDB|GRMZM2G481360_T01	1.5	19.367	1	20	1260	1279	UGCCUGGCUCCCUGUAUGCC	GGCAUCCGGGGAGCCAGGCA	Cleavage	seq=cds; coord=10:125546366..125549564:1; parent_gene=GRMZM2G481360	1
zma-miR160f-5p	gnl|ZmGDB|GRMZM2G458180_T01	1.5	17.352	1	20	1422	1441	UGCCUGGCUCCCUGUAUGCC	GGCAUCCGGGGAGCCAGGCA	Cleavage	seq=cds; coord=3:109713094..109716519:-1; parent_gene=GRMZM2G458180	1
zma-miR160f-5p	gnl|ZmGDB|GRMZM5G861501_T01	3	22.084	1	21	501	521	UGCCUGGCUCCCUGUAUGCCG	CGGCAUGGAGGGAGCCAAGCA	Cleavage	seq=cds; coord=9:9361617..9363747:-1; parent_gene=GRMZM5G861501	1
zma-miR160f-5p	gnl|ZmGDB|GRMZM2G162809_T01	2.5	18.64	1	20	437	456	UGCCUGGCUCCCUGUAUGCC	AGCGUACAGUGAGCCAGGCA	Translation	seq=cds; coord=5:189764162..189765024:-1; parent_gene=GRMZM2G162809	1
zma-miR160f-5p	gnl|ZmGDB|GRMZM2G704160_T01	3	23.339	1	21	15	35	UGCCUGGCUCCCUGUAUGCCG	CGGCAUGCGCGCAGCCAGGCA	Translation	seq=cds; coord=1:299571594..299572094:1; parent_gene=GRMZM2G704160	1
zma-miR160f-5p	gnl|ZmGDB|GRMZM2G077386_T01	2.5	18.446	1	20	131	150	UGCCUGGCUCCCUGUAUGCC	GGCGUACAUUGAGCCAGGCA	Translation	seq=cds; coord=7:134316140..134316558:1; parent_gene=GRMZM2G077386	1
zma-miR160f-3p	gnl|ZmGDB|GRMZM5G804203_T01	2.5	22.098	1	21	100	120	GCGUGCGAGGUGCCAGGCAUG	CGUGCUUGGCAGCUCGCGCGC	Translation	seq=cds; coord=5:173569280..173569669:1; parent_gene=GRMZM5G804203	1
zma-miR160f-3p	gnl|ZmGDB|AC213658.3_FGT002	3	23.963	1	21	67	87	GCGUGCGAGGUGCCAGGCAUG	CGUGUUUGGCAGCUCGCGCGC	Translation	seq=cds; coord=7:22192528..22192800:-1; parent_gene=AC213658.3_FG002	1
zma-miR396c	gnl|ZmGDB|GRMZM2G119359_T01	0	17.432	1	22	18	39	UUCCACAGGCUUUCUUGAACUG	CCGUUCAAGAAAGCCUGUGGAA	Cleavage	seq=cds; coord=9:25709471..25712485:1; parent_gene=GRMZM2G119359	1
zma-miR396c	gnl|ZmGDB|GRMZM2G129147_T02	0	22.507	1	22	18	39	UUCCACAGGCUUUCUUGAACUG	CCGUUCAAGAAAGCCUGUGGAA	Cleavage	seq=cds; coord=10:140968794..140971765:-1; parent_gene=GRMZM2G129147	1
zma-miR396c	gnl|ZmGDB|GRMZM2G098594_T04	0	15.604	1	22	18	39	UUCCACAGGCUUUCUUGAACUG	CCGUUCAAGAAAGCCUGUGGAA	Cleavage	seq=cds; coord=6:60193371..60196425:-1; parent_gene=GRMZM2G098594	1
zma-miR396c	gnl|ZmGDB|GRMZM2G098594_T03	0	15.604	1	22	18	39	UUCCACAGGCUUUCUUGAACUG	CCGUUCAAGAAAGCCUGUGGAA	Cleavage	seq=cds; coord=6:60193365..60196491:-1; parent_gene=GRMZM2G098594	1
zma-miR396c	gnl|ZmGDB|GRMZM2G067743_T01	0	21.025	1	22	147	168	UUCCACAGGCUUUCUUGAACUG	CCGUUCAAGAAAGCCUGUGGAA	Cleavage	seq=cds; coord=9:9812369..9814204:-1; parent_gene=GRMZM2G067743	1
zma-miR396c	gnl|ZmGDB|GRMZM2G033612_T02	0	9.814	1	22	48	69	UUCCACAGGCUUUCUUGAACUG	CCGUUCAAGAAAGCCUGUGGAA	Cleavage	seq=cds; coord=5:13806785..13809605:-1; parent_gene=GRMZM2G033612	1
zma-miR396c	gnl|ZmGDB|GRMZM2G067743_T02	0	21.025	1	22	364	385	UUCCACAGGCUUUCUUGAACUG	CCGUUCAAGAAAGCCUGUGGAA	Cleavage	seq=cds; coord=9:9812369..9814204:-1; parent_gene=GRMZM2G067743	1
zma-miR396c	gnl|ZmGDB|GRMZM5G893117_T01	0	20.913	1	22	373	394	UUCCACAGGCUUUCUUGAACUG	CCGUUCAAGAAAGCCUGUGGAA	Cleavage	seq=cds; coord=5:211724540..211725862:-1; parent_gene=GRMZM5G893117	1
zma-miR396c	gnl|ZmGDB|GRMZM2G067743_T03	0	18.306	1	22	363	384	UUCCACAGGCUUUCUUGAACUG	CCGUUCAAGAAAGCCUGUGGAA	Cleavage	seq=cds; coord=9:9812369..9814204:-1; parent_gene=GRMZM2G067743	1
zma-miR396c	gnl|ZmGDB|GRMZM2G034876_T03	0	24.616	1	22	468	489	UUCCACAGGCUUUCUUGAACUG	CCGUUCAAGAAAGCCUGUGGAA	Cleavage	seq=cds; coord=5:200291901..200295328:-1; parent_gene=GRMZM2G034876	1
zma-miR396c	gnl|ZmGDB|GRMZM2G018414_T02	0	14.213	1	22	264	285	UUCCACAGGCUUUCUUGAACUG	CCGUUCAAGAAAGCCUGUGGAA	Cleavage	seq=cds; coord=1:257186167..257188183:-1; parent_gene=GRMZM2G018414	1
zma-miR396c	gnl|ZmGDB|GRMZM5G850129_T03	0	16.03	1	22	366	387	UUCCACAGGCUUUCUUGAACUG	CCGUUCAAGAAAGCCUGUGGAA	Cleavage	seq=cds; coord=6:108305466..108307341:1; parent_gene=GRMZM5G850129	1
zma-miR396c	gnl|ZmGDB|GRMZM5G850129_T01	0	16.03	1	22	366	387	UUCCACAGGCUUUCUUGAACUG	CCGUUCAAGAAAGCCUGUGGAA	Cleavage	seq=cds; coord=6:108305466..108307189:1; parent_gene=GRMZM5G850129	1
zma-miR396c	gnl|ZmGDB|GRMZM5G850129_T04	0	16.03	1	22	498	519	UUCCACAGGCUUUCUUGAACUG	CCGUUCAAGAAAGCCUGUGGAA	Cleavage	seq=cds; coord=6:108305466..108307341:1; parent_gene=GRMZM5G850129	1
zma-miR396c	gnl|ZmGDB|GRMZM2G098594_T02	0	17.329	1	22	411	432	UUCCACAGGCUUUCUUGAACUG	CCGUUCAAGAAAGCCUGUGGAA	Cleavage	seq=cds; coord=6:60193338..60196474:-1; parent_gene=GRMZM2G098594	1
zma-miR396c	gnl|ZmGDB|GRMZM2G098594_T01	0	17.329	1	22	411	432	UUCCACAGGCUUUCUUGAACUG	CCGUUCAAGAAAGCCUGUGGAA	Cleavage	seq=cds; coord=6:60193338..60196491:-1; parent_gene=GRMZM2G098594	1
zma-miR396c	gnl|ZmGDB|GRMZM2G129147_T01	0	23.094	1	22	435	456	UUCCACAGGCUUUCUUGAACUG	CCGUUCAAGAAAGCCUGUGGAA	Cleavage	seq=cds; coord=10:140968794..140972587:-1; parent_gene=GRMZM2G129147	1
zma-miR396c	gnl|ZmGDB|GRMZM2G041223_T01	0	24.999	1	22	447	468	UUCCACAGGCUUUCUUGAACUG	CCGUUCAAGAAAGCCUGUGGAA	Cleavage	seq=cds; coord=2:12195366..12200646:1; parent_gene=GRMZM2G041223	1
zma-miR396c	gnl|ZmGDB|GRMZM2G098594_T06	0	17.329	1	22	411	432	UUCCACAGGCUUUCUUGAACUG	CCGUUCAAGAAAGCCUGUGGAA	Cleavage	seq=cds; coord=6:60193588..60196413:-1; parent_gene=GRMZM2G098594	1
zma-miR396c	gnl|ZmGDB|GRMZM5G850129_T02	0	16.03	1	22	498	519	UUCCACAGGCUUUCUUGAACUG	CCGUUCAAGAAAGCCUGUGGAA	Cleavage	seq=cds; coord=6:108305466..108307189:1; parent_gene=GRMZM5G850129	1
zma-miR396c	gnl|ZmGDB|GRMZM2G105335_T02	0	20.098	1	22	378	399	UUCCACAGGCUUUCUUGAACUG	CCGUUCAAGAAAGCCUGUGGAA	Cleavage	seq=cds; coord=4:177122616..177124549:1; parent_gene=GRMZM2G105335	1
zma-miR396c	gnl|ZmGDB|GRMZM2G105335_T01	0	20.098	1	22	378	399	UUCCACAGGCUUUCUUGAACUG	CCGUUCAAGAAAGCCUGUGGAA	Cleavage	seq=cds; coord=4:177122616..177124549:1; parent_gene=GRMZM2G105335	1
zma-miR396d	gnl|ZmGDB|GRMZM2G119359_T01	0	17.432	1	22	18	39	UUCCACAGGCUUUCUUGAACUG	CCGUUCAAGAAAGCCUGUGGAA	Cleavage	seq=cds; coord=9:25709471..25712485:1; parent_gene=GRMZM2G119359	1
zma-miR396d	gnl|ZmGDB|GRMZM2G129147_T02	0	22.507	1	22	18	39	UUCCACAGGCUUUCUUGAACUG	CCGUUCAAGAAAGCCUGUGGAA	Cleavage	seq=cds; coord=10:140968794..140971765:-1; parent_gene=GRMZM2G129147	1
zma-miR396d	gnl|ZmGDB|GRMZM2G098594_T04	0	15.604	1	22	18	39	UUCCACAGGCUUUCUUGAACUG	CCGUUCAAGAAAGCCUGUGGAA	Cleavage	seq=cds; coord=6:60193371..60196425:-1; parent_gene=GRMZM2G098594	1
zma-miR396d	gnl|ZmGDB|GRMZM2G098594_T03	0	15.604	1	22	18	39	UUCCACAGGCUUUCUUGAACUG	CCGUUCAAGAAAGCCUGUGGAA	Cleavage	seq=cds; coord=6:60193365..60196491:-1; parent_gene=GRMZM2G098594	1
zma-miR396d	gnl|ZmGDB|GRMZM2G067743_T01	0	21.025	1	22	147	168	UUCCACAGGCUUUCUUGAACUG	CCGUUCAAGAAAGCCUGUGGAA	Cleavage	seq=cds; coord=9:9812369..9814204:-1; parent_gene=GRMZM2G067743	1
zma-miR396d	gnl|ZmGDB|GRMZM2G033612_T02	0	9.814	1	22	48	69	UUCCACAGGCUUUCUUGAACUG	CCGUUCAAGAAAGCCUGUGGAA	Cleavage	seq=cds; coord=5:13806785..13809605:-1; parent_gene=GRMZM2G033612	1
zma-miR396d	gnl|ZmGDB|GRMZM2G067743_T02	0	21.025	1	22	364	385	UUCCACAGGCUUUCUUGAACUG	CCGUUCAAGAAAGCCUGUGGAA	Cleavage	seq=cds; coord=9:9812369..9814204:-1; parent_gene=GRMZM2G067743	1
zma-miR396d	gnl|ZmGDB|GRMZM5G893117_T01	0	20.913	1	22	373	394	UUCCACAGGCUUUCUUGAACUG	CCGUUCAAGAAAGCCUGUGGAA	Cleavage	seq=cds; coord=5:211724540..211725862:-1; parent_gene=GRMZM5G893117	1
zma-miR396d	gnl|ZmGDB|GRMZM2G067743_T03	0	18.306	1	22	363	384	UUCCACAGGCUUUCUUGAACUG	CCGUUCAAGAAAGCCUGUGGAA	Cleavage	seq=cds; coord=9:9812369..9814204:-1; parent_gene=GRMZM2G067743	1
zma-miR396d	gnl|ZmGDB|GRMZM2G034876_T03	0	24.616	1	22	468	489	UUCCACAGGCUUUCUUGAACUG	CCGUUCAAGAAAGCCUGUGGAA	Cleavage	seq=cds; coord=5:200291901..200295328:-1; parent_gene=GRMZM2G034876	1
zma-miR396d	gnl|ZmGDB|GRMZM2G018414_T02	0	14.213	1	22	264	285	UUCCACAGGCUUUCUUGAACUG	CCGUUCAAGAAAGCCUGUGGAA	Cleavage	seq=cds; coord=1:257186167..257188183:-1; parent_gene=GRMZM2G018414	1
zma-miR396d	gnl|ZmGDB|GRMZM5G850129_T03	0	16.03	1	22	366	387	UUCCACAGGCUUUCUUGAACUG	CCGUUCAAGAAAGCCUGUGGAA	Cleavage	seq=cds; coord=6:108305466..108307341:1; parent_gene=GRMZM5G850129	1
zma-miR396d	gnl|ZmGDB|GRMZM5G850129_T01	0	16.03	1	22	366	387	UUCCACAGGCUUUCUUGAACUG	CCGUUCAAGAAAGCCUGUGGAA	Cleavage	seq=cds; coord=6:108305466..108307189:1; parent_gene=GRMZM5G850129	1
zma-miR396d	gnl|ZmGDB|GRMZM5G850129_T04	0	16.03	1	22	498	519	UUCCACAGGCUUUCUUGAACUG	CCGUUCAAGAAAGCCUGUGGAA	Cleavage	seq=cds; coord=6:108305466..108307341:1; parent_gene=GRMZM5G850129	1
zma-miR396d	gnl|ZmGDB|GRMZM2G098594_T02	0	17.329	1	22	411	432	UUCCACAGGCUUUCUUGAACUG	CCGUUCAAGAAAGCCUGUGGAA	Cleavage	seq=cds; coord=6:60193338..60196474:-1; parent_gene=GRMZM2G098594	1
zma-miR396d	gnl|ZmGDB|GRMZM2G098594_T01	0	17.329	1	22	411	432	UUCCACAGGCUUUCUUGAACUG	CCGUUCAAGAAAGCCUGUGGAA	Cleavage	seq=cds; coord=6:60193338..60196491:-1; parent_gene=GRMZM2G098594	1
zma-miR396d	gnl|ZmGDB|GRMZM2G129147_T01	0	23.094	1	22	435	456	UUCCACAGGCUUUCUUGAACUG	CCGUUCAAGAAAGCCUGUGGAA	Cleavage	seq=cds; coord=10:140968794..140972587:-1; parent_gene=GRMZM2G129147	1
zma-miR396d	gnl|ZmGDB|GRMZM2G041223_T01	0	24.999	1	22	447	468	UUCCACAGGCUUUCUUGAACUG	CCGUUCAAGAAAGCCUGUGGAA	Cleavage	seq=cds; coord=2:12195366..12200646:1; parent_gene=GRMZM2G041223	1
zma-miR396d	gnl|ZmGDB|GRMZM2G098594_T06	0	17.329	1	22	411	432	UUCCACAGGCUUUCUUGAACUG	CCGUUCAAGAAAGCCUGUGGAA	Cleavage	seq=cds; coord=6:60193588..60196413:-1; parent_gene=GRMZM2G098594	1
zma-miR396d	gnl|ZmGDB|GRMZM5G850129_T02	0	16.03	1	22	498	519	UUCCACAGGCUUUCUUGAACUG	CCGUUCAAGAAAGCCUGUGGAA	Cleavage	seq=cds; coord=6:108305466..108307189:1; parent_gene=GRMZM5G850129	1
zma-miR396d	gnl|ZmGDB|GRMZM2G105335_T02	0	20.098	1	22	378	399	UUCCACAGGCUUUCUUGAACUG	CCGUUCAAGAAAGCCUGUGGAA	Cleavage	seq=cds; coord=4:177122616..177124549:1; parent_gene=GRMZM2G105335	1
zma-miR396d	gnl|ZmGDB|GRMZM2G105335_T01	0	20.098	1	22	378	399	UUCCACAGGCUUUCUUGAACUG	CCGUUCAAGAAAGCCUGUGGAA	Cleavage	seq=cds; coord=4:177122616..177124549:1; parent_gene=GRMZM2G105335	1
zma-miR2118a	gnl|ZmGDB|GRMZM2G133233_T01	3	22.107	1	22	92	113	UUCCUGAUGCCUCUCAUUCCUA	UAGGAUUGGUAGGCAUUAGGAA	Cleavage	seq=cds; coord=10:116473096..116473758:1; parent_gene=GRMZM2G133233	1
zma-miR2118a	gnl|ZmGDB|GRMZM2G548519_T01	3	12.319	1	22	54	75	UUCCUGAUGCCUCUCAUUCCUA	UGGGUAUAAGAGGAAUCAGGAA	Translation	seq=cds; coord=6:66619999..66620549:1; parent_gene=GRMZM2G548519	1
zma-miR2118b	gnl|ZmGDB|GRMZM2G565520_T01	2.5	8.588	1	21	41	61	UUCCCGAUGCCUCCCAUUCCU	GGGAAUGGGAGGAAUGGGGAA	Translation	seq=cds; coord=8:83080578..83080700:1; parent_gene=GRMZM2G565520	1
zma-miR2118b	gnl|ZmGDB|GRMZM2G327659_T01	2.5	21.822	1	22	677	698	UUCCCGAUGCCUCCCAUUCCUA	UUGGAAUGGGGGGCAUUGGCAA	Cleavage	seq=cds; coord=4:200734715..200738675:-1; parent_gene=GRMZM2G327659	1
zma-miR2118b	gnl|ZmGDB|GRMZM2G022651_T01	3	17.195	1	21	227	247	UUCCCGAUGCCUCCCAUUCCU	AGGAAGAGGAGGCGUCGGGGA	Cleavage	seq=cds; coord=3:4894111..4896145:-1; parent_gene=GRMZM2G022651	1
zma-miR2118b	gnl|ZmGDB|AC204407.3_FGT004	2.5	22.226	1	21	1236	1256	UUCCCGAUGCCUCCCAUUCCU	GGGAAUGGGAGGACUUGGGAA	Translation	seq=cds; coord=10:9892856..9895225:1; parent_gene=AC204407.3_FG004	1
zma-miR2118b	gnl|ZmGDB|AC214841.3_FGT009	3	11.818	1	21	9	29	UUCCCGAUGCCUCCCAUUCCU	GGGAGGUGGAGGCAUCGGGGA	Cleavage	seq=cds; coord=1:34515263..34515772:-1; parent_gene=AC214841.3_FG009	1
zma-miR2118b	gnl|ZmGDB|AC202434.3_FGT004	3	17.703	1	21	558	578	UUCCCGAUGCCUCCCAUUCCU	GGGAGGUGGAGGCAUCGGGGA	Cleavage	seq=cds; coord=1:76625484..76626287:1; parent_gene=AC202434.3_FG004	1
zma-miR2118b	gnl|ZmGDB|GRMZM5G897958_T01	3	22.466	1	22	1031	1052	UUCCCGAUGCCUCCCAUUCCUA	UUGGAGUUGGAGGCUUUGGGAA	Cleavage	seq=cds; coord=6:124877396..124879706:-1; parent_gene=GRMZM5G897958	1
zma-miR2118c	gnl|ZmGDB|GRMZM2G133233_T01	2	22.107	1	22	92	113	UUCCUAAUGCCUCCCAUUCCUA	UAGGAUUGGUAGGCAUUAGGAA	Cleavage	seq=cds; coord=10:116473096..116473758:1; parent_gene=GRMZM2G133233	1
zma-miR2118c	gnl|ZmGDB|GRMZM2G577445_T01	2.5	23.496	1	21	3	23	UUCCUAAUGCCUCCCAUUCCU	AGGAAUAGGAGCCAUUAGGAG	Translation	seq=cds; coord=6:120680336..120680427:-1; parent_gene=GRMZM2G577445	1
zma-miR2118c	gnl|ZmGDB|GRMZM2G327659_T01	2.5	21.822	1	22	677	698	UUCCUAAUGCCUCCCAUUCCUA	UUGGAAUGGGGGGCAUUGGCAA	Cleavage	seq=cds; coord=4:200734715..200738675:-1; parent_gene=GRMZM2G327659	1
zma-miR2118c	gnl|ZmGDB|GRMZM2G157869_T01	3	12.863	1	21	662	682	UUCCUAAUGCCUCCCAUUCCU	AGGGAUGGUGGGUAUUAGGAG	Cleavage	seq=cds; coord=2:52494806..52495922:-1; parent_gene=GRMZM2G157869	1
zma-miR2118c	gnl|ZmGDB|GRMZM2G565520_T01	3	8.588	1	21	41	61	UUCCUAAUGCCUCCCAUUCCU	GGGAAUGGGAGGAAUGGGGAA	Translation	seq=cds; coord=8:83080578..83080700:1; parent_gene=GRMZM2G565520	1
zma-miR2118c	gnl|ZmGDB|GRMZM2G172485_T01	3	20.535	1	21	1821	1841	UUCCUAAUGCCUCCCAUUCCU	AGCAACGGGAGGCAUUAGGAU	Cleavage	seq=cds; coord=2:217010540..217013071:-1; parent_gene=GRMZM2G172485	1
zma-miR2118c	gnl|ZmGDB|AC204407.3_FGT004	2.5	22.226	1	21	1236	1256	UUCCUAAUGCCUCCCAUUCCU	GGGAAUGGGAGGACUUGGGAA	Translation	seq=cds; coord=10:9892856..9895225:1; parent_gene=AC204407.3_FG004	1
zma-miR2118c	gnl|ZmGDB|GRMZM5G897958_T01	3	22.466	1	22	1031	1052	UUCCUAAUGCCUCCCAUUCCUA	UUGGAGUUGGAGGCUUUGGGAA	Cleavage	seq=cds; coord=6:124877396..124879706:-1; parent_gene=GRMZM5G897958	1
zma-miR2118d	gnl|ZmGDB|GRMZM5G815642_T01	3	21.859	1	20	117	136	UUCCUGAUGCCUCCCAUGCC	GGCAUGGGAGGCAUCUAGAA	Cleavage	seq=cds; coord=7:3866964..3867107:-1; parent_gene=GRMZM5G815642	1
zma-miR2118d	gnl|ZmGDB|GRMZM2G003237_T01	3	19.32	1	21	656	676	UUCCUGAUGCCUCCCAUGCCU	AGUCAUGUGAGGCAUUAGGGA	Cleavage	seq=cds; coord=1:159485619..159489147:-1; parent_gene=GRMZM2G003237	1
zma-miR2118d	gnl|ZmGDB|GRMZM2G046070_T02	3	23.456	1	20	610	629	UUCCUGAUGCCUCCCAUGCC	UGCAUGGGGAGCAUCAGGGA	Translation	seq=cds; coord=2:10531049..10535293:-1; parent_gene=GRMZM2G046070	1
zma-miR2118d	gnl|ZmGDB|GRMZM2G046070_T01	3	23.456	1	20	904	923	UUCCUGAUGCCUCCCAUGCC	UGCAUGGGGAGCAUCAGGGA	Translation	seq=cds; coord=2:10531049..10535293:-1; parent_gene=GRMZM2G046070	1
zma-miR2118d	gnl|ZmGDB|GRMZM2G046070_T03	3	24.168	1	20	934	953	UUCCUGAUGCCUCCCAUGCC	UGCAUGGGGAGCAUCAGGGA	Translation	seq=cds; coord=2:10531186..10535293:-1; parent_gene=GRMZM2G046070	1
zma-miR2118e	gnl|ZmGDB|GRMZM2G133233_T01	3	22.107	1	22	92	113	UUCCUGAUGUCUCCCAUUCCUA	UAGGAUUGGUAGGCAUUAGGAA	Cleavage	seq=cds; coord=10:116473096..116473758:1; parent_gene=GRMZM2G133233	1
zma-miR2118e	gnl|ZmGDB|GRMZM2G577445_T01	3	23.496	1	21	3	23	UUCCUGAUGUCUCCCAUUCCU	AGGAAUAGGAGCCAUUAGGAG	Translation	seq=cds; coord=6:120680336..120680427:-1; parent_gene=GRMZM2G577445	1
zma-miR2118f	gnl|ZmGDB|GRMZM2G470271_T01	3	7.061	1	20	6	25	UUCCCAAUGCCUUCCAUGCC	GGCAUGGAUGGCAUGGGGAG	Cleavage	seq=cds; coord=8:124192397..124193852:1; parent_gene=GRMZM2G470271	1
zma-miR2118f	gnl|ZmGDB|GRMZM2G030051_T01	3	18.588	1	20	2152	2171	UUCCCAAUGCCUUCCAUGCC	GGCAUGGAAGUCAUAGGGAG	Translation	seq=cds; coord=9:25062949..25065642:-1; parent_gene=GRMZM2G030051	1
zma-miR2118f	gnl|ZmGDB|GRMZM2G088828_T01	3	21.537	1	21	759	779	UUCCCAAUGCCUUCCAUGCCU	GGGUGAGGCAGGCAUUGGGAA	Cleavage	seq=cds; coord=8:163424050..163434210:1; parent_gene=GRMZM2G088828	1
zma-miR2118g	gnl|ZmGDB|GRMZM2G577445_T01	2	23.496	1	21	3	23	UUCCUGAUGCCUCCUAUUCCU	AGGAAUAGGAGCCAUUAGGAG	Translation	seq=cds; coord=6:120680336..120680427:-1; parent_gene=GRMZM2G577445	1
zma-miR2118g	gnl|ZmGDB|GRMZM2G022651_T01	2.5	17.195	1	21	227	247	UUCCUGAUGCCUCCUAUUCCU	AGGAAGAGGAGGCGUCGGGGA	Cleavage	seq=cds; coord=3:4894111..4896145:-1; parent_gene=GRMZM2G022651	1
zma-miR2118g	gnl|ZmGDB|GRMZM2G133233_T01	3	22.107	1	22	92	113	UUCCUGAUGCCUCCUAUUCCUA	UAGGAUUGGUAGGCAUUAGGAA	Cleavage	seq=cds; coord=10:116473096..116473758:1; parent_gene=GRMZM2G133233	1
zma-miR2118g	gnl|ZmGDB|AC189752.3_FGT003	3	17.545	1	21	326	346	UUCCUGAUGCCUCCUAUUCCU	AGGAAGAGGGGGCGUCAGGGG	Cleavage	seq=cds; coord=4:209094337..209094840:1; parent_gene=AC189752.3_FG003	1
zma-miR2118g	gnl|ZmGDB|GRMZM2G548519_T01	3	12.319	1	22	54	75	UUCCUGAUGCCUCCUAUUCCUA	UGGGUAUAAGAGGAAUCAGGAA	Translation	seq=cds; coord=6:66619999..66620549:1; parent_gene=GRMZM2G548519	1
zma-miR2118g	gnl|ZmGDB|AC210828.3_FGT007	3	12.263	1	21	9	29	UUCCUGAUGCCUCCUAUUCCU	GGGAGGUGGAGGCAUCAGGGA	Cleavage	seq=cds; coord=1:172839225..172839734:-1; parent_gene=AC210828.3_FG007	1
zma-miR2275a-5p	gnl|ZmGDB|GRMZM2G087525_T01	1.5	19.377	1	21	98	118	AGAGUUGGAGGAAAGCAAACC	GGUUUACUUUCCUCCGACUCU	Cleavage	seq=cds; coord=10:71457836..71458369:-1; parent_gene=GRMZM2G087525	1
zma-miR2275a-5p	gnl|ZmGDB|GRMZM2G081886_T01	2.5	18.593	1	20	1860	1879	AGAGUUGGAGGAAAGCAAAC	GUUUGUUUUCCUCAAGCUCU	Cleavage	seq=cds; coord=2:5064059..5067153:-1; parent_gene=GRMZM2G081886	1
zma-miR2275a-5p	gnl|ZmGDB|GRMZM2G081886_T02	2.5	18.593	1	20	1122	1141	AGAGUUGGAGGAAAGCAAAC	GUUUGUUUUCCUCAAGCUCU	Cleavage	seq=cds; coord=2:5064059..5066087:-1; parent_gene=GRMZM2G081886	1
zma-miR2275a-5p	gnl|ZmGDB|GRMZM2G060276_T01	2.5	20.303	1	20	122	141	AGAGUUGGAGGAAAGCAAAC	GUUUGCUGUCCUUCAACUCC	Cleavage	seq=cds; coord=3:176784206..176791026:1; parent_gene=GRMZM2G060276	1
zma-miR2275a-5p	gnl|ZmGDB|GRMZM2G060276_T02	2.5	20.303	1	20	122	141	AGAGUUGGAGGAAAGCAAAC	GUUUGCUGUCCUUCAACUCC	Cleavage	seq=cds; coord=3:176783173..176785632:1; parent_gene=GRMZM2G060276	1
zma-miR2275a-5p	gnl|ZmGDB|GRMZM2G009323_T01	3	17.531	1	20	1818	1837	AGAGUUGGAGGAAAGCAAAC	GUUUGUUUUCCUCAAGCUUU	Cleavage	seq=cds; coord=10:145794456..145798655:1; parent_gene=GRMZM2G009323	1
zma-miR2275a-3p	gnl|ZmGDB|GRMZM2G506418_T01	1.5	13.845	1	22	5	26	UUUGUUUUCCUCCAAUAUCUCA	UGAGAUAUUGGAGAGAAACAAA	Translation	seq=cds; coord=4:3762803..3763036:1; parent_gene=GRMZM2G506418	1
zma-miR2275a-3p	gnl|ZmGDB|GRMZM2G322047_T01	2.5	20.088	1	21	1109	1129	UUUGUUUUCCUCCAAUAUCUC	GAGAUAUUGGAGGAAGACCAG	Cleavage	seq=cds; coord=8:8014962..8018180:-1; parent_gene=GRMZM2G322047	1
zma-miR2275a-3p	gnl|ZmGDB|GRMZM2G329177_T02	2	21.676	1	21	3811	3831	UUUGUUUUCCUCCAAUAUCUC	GAGGCAUUGGAGGAAAACAAG	Cleavage	seq=cds; coord=1:2428332..2435360:1; parent_gene=GRMZM2G329177	1
zma-miR2275a-3p	gnl|ZmGDB|GRMZM2G329177_T01	2	21.676	1	21	3811	3831	UUUGUUUUCCUCCAAUAUCUC	GAGGCAUUGGAGGAAAACAAG	Cleavage	seq=cds; coord=1:2428332..2435658:1; parent_gene=GRMZM2G329177	1
zma-miR2275a-3p	gnl|ZmGDB|GRMZM2G546118_T01	2	17.436	1	20	313	332	UUUGUUUUCCUCCAAUAUCU	AGAUAUUGGAGGAAGACAGC	Cleavage	seq=cds; coord=1:223301909..223304039:1; parent_gene=GRMZM2G546118	1
zma-miR2275a-3p	gnl|ZmGDB|GRMZM2G025579_T01	3	14.749	1	22	570	591	UUUGUUUUCCUCCAAUAUCUCA	UGAGAAAUUGGAGGAAAAUAUA	Cleavage	seq=cds; coord=9:108517434..108524415:1; parent_gene=GRMZM2G025579	1
zma-miR2275a-3p	gnl|ZmGDB|GRMZM5G860569_T01	3	16.886	1	22	47	68	UUUGUUUUCCUCCAAUAUCUCA	UGGACUAUUGGAGGAAAGCAAA	Cleavage	seq=cds; coord=1:177422861..177423481:1; parent_gene=GRMZM5G860569	1
zma-miR2275a-3p	gnl|ZmGDB|GRMZM2G113163_T01	2.5	16.699	1	21	2980	3000	UUUGUUUUCCUCCAAUAUCUC	GAGGCAUUGGAGGAAAAUAAG	Cleavage	seq=cds; coord=9:154760893..154765330:1; parent_gene=GRMZM2G113163	1
zma-miR2275a-3p	gnl|ZmGDB|GRMZM2G403218_T01	3	0.289	1	21	322	342	UUUGUUUUCCUCCAAUAUCUC	GAGAUGGUGGAGGAAGAUGAA	Cleavage	seq=cds; coord=5:19248578..19256071:-1; parent_gene=GRMZM2G403218	1
zma-miR2275a-3p	gnl|ZmGDB|GRMZM2G403218_T02	3	0.289	1	21	322	342	UUUGUUUUCCUCCAAUAUCUC	GAGAUGGUGGAGGAAGAUGAA	Cleavage	seq=cds; coord=5:19248578..19256071:-1; parent_gene=GRMZM2G403218	1
zma-miR2275a-3p	gnl|ZmGDB|GRMZM2G515408_T01	3	14.229	1	22	50	71	UUUGUUUUCCUCCAAUAUCUCA	UUAGAUAUUGGAGAAAUAUAAA	Translation	seq=cds; coord=9:154952033..154952133:-1; parent_gene=GRMZM2G515408	1
zma-miR2275a-3p	gnl|ZmGDB|GRMZM2G512860_T01	3	12.153	1	22	50	71	UUUGUUUUCCUCCAAUAUCUCA	UUAGAUAUUGGAGAAAUAUAAA	Translation	seq=cds; coord=2:196072046..196072146:-1; parent_gene=GRMZM2G512860	1
zma-miR2275b-5p	gnl|ZmGDB|GRMZM2G154532_T07	2	18.772	1	21	271	291	AGGAUUAGAGGCAACUGAACC	GGUUUAGUUGUCUCUAGUCUU	Cleavage	seq=cds; coord=3:82052898..82106476:1; parent_gene=GRMZM2G154532	1
zma-miR2275b-5p	gnl|ZmGDB|GRMZM2G154532_T06	2	18.772	1	21	235	255	AGGAUUAGAGGCAACUGAACC	GGUUUAGUUGUCUCUAGUCUU	Cleavage	seq=cds; coord=3:82052898..82106476:1; parent_gene=GRMZM2G154532	1
zma-miR2275b-5p	gnl|ZmGDB|GRMZM2G154532_T04	2	18.772	1	21	235	255	AGGAUUAGAGGCAACUGAACC	GGUUUAGUUGUCUCUAGUCUU	Cleavage	seq=cds; coord=3:82052898..82106476:1; parent_gene=GRMZM2G154532	1
zma-miR2275b-5p	gnl|ZmGDB|GRMZM2G154532_T05	2	18.772	1	21	235	255	AGGAUUAGAGGCAACUGAACC	GGUUUAGUUGUCUCUAGUCUU	Cleavage	seq=cds; coord=3:82052898..82106476:1; parent_gene=GRMZM2G154532	1
zma-miR2275b-5p	gnl|ZmGDB|GRMZM2G361855_T01	3	15.213	1	20	1244	1263	AGGAUUAGAGGCAACUGAAC	GUUCUGAUGCUUCUAAUCUU	Cleavage	seq=cds; coord=1:99040137..99044070:1; parent_gene=GRMZM2G361855	1
zma-miR2275b-3p	gnl|ZmGDB|GRMZM5G891058_T01	3	15.925	1	22	16	37	UUCAGUUUCCUCUAAUAUCUCA	UGGGCUAUUAGAGGAAACUCAA	Cleavage	seq=cds; coord=10:75253467..75254200:1; parent_gene=GRMZM5G891058	1
zma-miR2275b-3p	gnl|ZmGDB|GRMZM2G077197_T02	3	15.382	1	22	498	519	UUCAGUUUCCUCUAAUAUCUCA	UGAGGUACUAGAGCAAGCUGAA	Translation	seq=cds; coord=3:5984258..5986991:1; parent_gene=GRMZM2G077197	1
zma-miR2275b-3p	gnl|ZmGDB|GRMZM2G077197_T01	3	15.382	1	22	1191	1212	UUCAGUUUCCUCUAAUAUCUCA	UGAGGUACUAGAGCAAGCUGAA	Translation	seq=cds; coord=3:5982151..5986991:1; parent_gene=GRMZM2G077197	1
zma-miR2275b-3p	gnl|ZmGDB|GRMZM2G004023_T03	2.5	21.348	1	20	878	897	UUCAGUUUCCUCUAAUAUCU	AGAUGUUUGAGGAGGCUGAA	Cleavage	seq=cds; coord=9:150715901..150719617:-1; parent_gene=GRMZM2G004023	1
zma-miR2275b-3p	gnl|ZmGDB|GRMZM2G004023_T04	2.5	21.348	1	20	878	897	UUCAGUUUCCUCUAAUAUCU	AGAUGUUUGAGGAGGCUGAA	Cleavage	seq=cds; coord=9:150715901..150719617:-1; parent_gene=GRMZM2G004023	1
zma-miR2275b-3p	gnl|ZmGDB|GRMZM2G004023_T02	2.5	21.348	1	20	878	897	UUCAGUUUCCUCUAAUAUCU	AGAUGUUUGAGGAGGCUGAA	Cleavage	seq=cds; coord=9:150715417..150719617:-1; parent_gene=GRMZM2G004023	1
zma-miR2275b-3p	gnl|ZmGDB|GRMZM2G004023_T06	2.5	21.348	1	20	878	897	UUCAGUUUCCUCUAAUAUCU	AGAUGUUUGAGGAGGCUGAA	Cleavage	seq=cds; coord=9:150715540..150719569:-1; parent_gene=GRMZM2G004023	1
zma-miR2275b-3p	gnl|ZmGDB|GRMZM2G004023_T01	2.5	21.348	1	20	878	897	UUCAGUUUCCUCUAAUAUCU	AGAUGUUUGAGGAGGCUGAA	Cleavage	seq=cds; coord=9:150715417..150719617:-1; parent_gene=GRMZM2G004023	1
zma-miR2275b-3p	gnl|ZmGDB|GRMZM2G004023_T05	2.5	21.348	1	20	878	897	UUCAGUUUCCUCUAAUAUCU	AGAUGUUUGAGGAGGCUGAA	Cleavage	seq=cds; coord=9:150715901..150719617:-1; parent_gene=GRMZM2G004023	1
zma-miR2275b-3p	gnl|ZmGDB|GRMZM5G846950_T01	3	14.012	1	20	135	154	UUCAGUUUCCUCUAAUAUCU	AGAUAUUAGACGGAACUGCA	Translation	seq=cds; coord=3:203025434..203026931:-1; parent_gene=GRMZM5G846950	1
zma-miR2275b-3p	gnl|ZmGDB|AC211265.4_FGT011	3	17.102	1	21	311	330	UUCAGUUUCCUCUAAUAUCUC	GAGGU-UUAGAGGAAGCUGAA	Cleavage	seq=cds; coord=1:150484435..150484923:1; parent_gene=AC211265.4_FG011	1
zma-miR2275c-5p	gnl|ZmGDB|GRMZM2G003718_T01	3	22.642	1	20	848	867	AGGAUUAGAGGGACUUGAAC	GUUCAGGUCCUUCAGAUCCU	Cleavage	seq=cds; coord=9:97424793..97429264:-1; parent_gene=GRMZM2G003718	1
zma-miR2275c-3p	gnl|ZmGDB|GRMZM5G891058_T01	3	15.925	1	22	16	37	UUCAGUUUCCUCUAAUAUCUCA	UGGGCUAUUAGAGGAAACUCAA	Cleavage	seq=cds; coord=10:75253467..75254200:1; parent_gene=GRMZM5G891058	1
zma-miR2275c-3p	gnl|ZmGDB|GRMZM2G077197_T02	3	15.382	1	22	498	519	UUCAGUUUCCUCUAAUAUCUCA	UGAGGUACUAGAGCAAGCUGAA	Translation	seq=cds; coord=3:5984258..5986991:1; parent_gene=GRMZM2G077197	1
zma-miR2275c-3p	gnl|ZmGDB|GRMZM2G077197_T01	3	15.382	1	22	1191	1212	UUCAGUUUCCUCUAAUAUCUCA	UGAGGUACUAGAGCAAGCUGAA	Translation	seq=cds; coord=3:5982151..5986991:1; parent_gene=GRMZM2G077197	1
zma-miR2275c-3p	gnl|ZmGDB|GRMZM2G004023_T03	2.5	21.348	1	20	878	897	UUCAGUUUCCUCUAAUAUCU	AGAUGUUUGAGGAGGCUGAA	Cleavage	seq=cds; coord=9:150715901..150719617:-1; parent_gene=GRMZM2G004023	1
zma-miR2275c-3p	gnl|ZmGDB|GRMZM2G004023_T04	2.5	21.348	1	20	878	897	UUCAGUUUCCUCUAAUAUCU	AGAUGUUUGAGGAGGCUGAA	Cleavage	seq=cds; coord=9:150715901..150719617:-1; parent_gene=GRMZM2G004023	1
zma-miR2275c-3p	gnl|ZmGDB|GRMZM2G004023_T02	2.5	21.348	1	20	878	897	UUCAGUUUCCUCUAAUAUCU	AGAUGUUUGAGGAGGCUGAA	Cleavage	seq=cds; coord=9:150715417..150719617:-1; parent_gene=GRMZM2G004023	1
zma-miR2275c-3p	gnl|ZmGDB|GRMZM2G004023_T06	2.5	21.348	1	20	878	897	UUCAGUUUCCUCUAAUAUCU	AGAUGUUUGAGGAGGCUGAA	Cleavage	seq=cds; coord=9:150715540..150719569:-1; parent_gene=GRMZM2G004023	1
zma-miR2275c-3p	gnl|ZmGDB|GRMZM2G004023_T01	2.5	21.348	1	20	878	897	UUCAGUUUCCUCUAAUAUCU	AGAUGUUUGAGGAGGCUGAA	Cleavage	seq=cds; coord=9:150715417..150719617:-1; parent_gene=GRMZM2G004023	1
zma-miR2275c-3p	gnl|ZmGDB|GRMZM2G004023_T05	2.5	21.348	1	20	878	897	UUCAGUUUCCUCUAAUAUCU	AGAUGUUUGAGGAGGCUGAA	Cleavage	seq=cds; coord=9:150715901..150719617:-1; parent_gene=GRMZM2G004023	1
zma-miR2275c-3p	gnl|ZmGDB|GRMZM5G846950_T01	3	14.012	1	20	135	154	UUCAGUUUCCUCUAAUAUCU	AGAUAUUAGACGGAACUGCA	Translation	seq=cds; coord=3:203025434..203026931:-1; parent_gene=GRMZM5G846950	1
zma-miR2275c-3p	gnl|ZmGDB|AC211265.4_FGT011	3	17.102	1	21	311	330	UUCAGUUUCCUCUAAUAUCUC	GAGGU-UUAGAGGAAGCUGAA	Cleavage	seq=cds; coord=1:150484435..150484923:1; parent_gene=AC211265.4_FG011	1
zma-miR2275d-5p	gnl|ZmGDB|GRMZM2G087525_T01	1.5	19.377	1	21	98	118	AGAGUUGGAGGAAAGAAAACU	GGUUUACUUUCCUCCGACUCU	Cleavage	seq=cds; coord=10:71457836..71458369:-1; parent_gene=GRMZM2G087525	1
zma-miR2275d-5p	gnl|ZmGDB|GRMZM2G110584_T01	3	17.773	1	21	28	48	AGAGUUGGAGGAAAGAAAACU	GGUUUUUUUUCCUCCAUUUUU	Cleavage	seq=cds; coord=8:112834376..112835141:1; parent_gene=GRMZM2G110584	1
zma-miR2275d-5p	gnl|ZmGDB|GRMZM2G174430_T01	3	20.916	1	20	112	131	AGAGUUGGAGGAAAGAAAAC	GUUUUUUUUCCUGCAGCUCG	Cleavage	seq=cds; coord=2:193392291..193393014:1; parent_gene=GRMZM2G174430	1
zma-miR2275d-3p	gnl|ZmGDB|GRMZM2G506418_T01	2	13.845	1	22	5	26	UUUGUUUUCCUCUAAUAUCUCA	UGAGAUAUUGGAGAGAAACAAA	Translation	seq=cds; coord=4:3762803..3763036:1; parent_gene=GRMZM2G506418	1
zma-miR2275d-3p	gnl|ZmGDB|GRMZM2G329177_T02	2.5	21.676	1	21	3811	3831	UUUGUUUUCCUCUAAUAUCUC	GAGGCAUUGGAGGAAAACAAG	Cleavage	seq=cds; coord=1:2428332..2435360:1; parent_gene=GRMZM2G329177	1
zma-miR2275d-3p	gnl|ZmGDB|GRMZM2G329177_T01	2.5	21.676	1	21	3811	3831	UUUGUUUUCCUCUAAUAUCUC	GAGGCAUUGGAGGAAAACAAG	Cleavage	seq=cds; coord=1:2428332..2435658:1; parent_gene=GRMZM2G329177	1
zma-miR2275d-3p	gnl|ZmGDB|GRMZM2G322047_T01	3	20.088	1	21	1109	1129	UUUGUUUUCCUCUAAUAUCUC	GAGAUAUUGGAGGAAGACCAG	Cleavage	seq=cds; coord=8:8014962..8018180:-1; parent_gene=GRMZM2G322047	1
zma-miR2275d-3p	gnl|ZmGDB|GRMZM2G546118_T01	2.5	17.436	1	20	313	332	UUUGUUUUCCUCUAAUAUCU	AGAUAUUGGAGGAAGACAGC	Cleavage	seq=cds; coord=1:223301909..223304039:1; parent_gene=GRMZM2G546118	1
zma-miR2275d-3p	gnl|ZmGDB|GRMZM2G113163_T01	3	16.699	1	21	2980	3000	UUUGUUUUCCUCUAAUAUCUC	GAGGCAUUGGAGGAAAAUAAG	Cleavage	seq=cds; coord=9:154760893..154765330:1; parent_gene=GRMZM2G113163	1
zma-miR2275d-3p	gnl|ZmGDB|GRMZM2G581387_T01	3	15.534	1	21	34	54	UUUGUUUUCCUCUAAUAUCUC	GUGAUAGUAGAGGAAAACAAC	Cleavage	seq=cds; coord=8:24352117..24352224:-1; parent_gene=GRMZM2G581387	1
zma-miR2275d-3p	gnl|ZmGDB|GRMZM2G422464_T02	3	17.238	1	21	2168	2188	UUUGUUUUCCUCUAAUAUCUC	GAGGUACUAAAGGGAAACAAA	Cleavage	seq=cds; coord=4:218137643..218155614:-1; parent_gene=GRMZM2G422464	1
zma-miR2275d-3p	gnl|ZmGDB|GRMZM2G422464_T01	3	17.238	1	21	2168	2188	UUUGUUUUCCUCUAAUAUCUC	GAGGUACUAAAGGGAAACAAA	Cleavage	seq=cds; coord=4:218137641..218155614:-1; parent_gene=GRMZM2G422464	1
zma-miR156l-5p	gnl|ZmGDB|GRMZM2G551565_T01	0	18.556	1	20	25	44	UGACAGAAGAGAGUGAGCAC	GUGCUCACUCUCUUCUGUCA	Cleavage	seq=cds; coord=5:92369026..92369713:1; parent_gene=GRMZM2G551565	1
zma-miR156l-5p	gnl|ZmGDB|AC233751.1_FGT002	1	23.513	1	20	1415	1434	UGACAGAAGAGAGUGAGCAC	GUGCUCUCUCUCUUCUGUCA	Cleavage	seq=cds; coord=4:44780143..44784469:-1; parent_gene=AC233751.1_FG002	1
zma-miR156l-5p	gnl|ZmGDB|GRMZM2G097275_T01	1	21.867	1	20	1106	1125	UGACAGAAGAGAGUGAGCAC	GUGCUCUCUCUCUUCUGUCA	Cleavage	seq=cds; coord=5:77940666..77945714:1; parent_gene=GRMZM2G097275	1
zma-miR156l-5p	gnl|ZmGDB|GRMZM2G097275_T03	1	21.867	1	20	1106	1125	UGACAGAAGAGAGUGAGCAC	GUGCUCUCUCUCUUCUGUCA	Cleavage	seq=cds; coord=5:77940666..77945676:1; parent_gene=GRMZM2G097275	1
zma-miR156l-5p	gnl|ZmGDB|GRMZM2G097275_T02	1	21.867	1	20	1106	1125	UGACAGAAGAGAGUGAGCAC	GUGCUCUCUCUCUUCUGUCA	Cleavage	seq=cds; coord=5:77940666..77945676:1; parent_gene=GRMZM2G097275	1
zma-miR156l-5p	gnl|ZmGDB|GRMZM5G878561_T01	1	19.127	1	20	950	969	UGACAGAAGAGAGUGAGCAC	GUGCUCUCUCUCUUCUGUCA	Cleavage	seq=cds; coord=3:159377754..159382446:-1; parent_gene=GRMZM5G878561	1
zma-miR156l-5p	gnl|ZmGDB|GRMZM2G097275_T04	1	21.867	1	20	998	1017	UGACAGAAGAGAGUGAGCAC	GUGCUCUCUCUCUUCUGUCA	Cleavage	seq=cds; coord=5:77940666..77945477:1; parent_gene=GRMZM2G097275	1
zma-miR156l-5p	gnl|ZmGDB|GRMZM2G061734_T01	1	17.452	1	20	941	960	UGACAGAAGAGAGUGAGCAC	GUGCUCUCUCUCUUCUGUCA	Cleavage	seq=cds; coord=2:192157754..192162802:1; parent_gene=GRMZM2G061734	1
zma-miR156l-5p	gnl|ZmGDB|GRMZM2G460544_T01	1	20.772	1	20	848	867	UGACAGAAGAGAGUGAGCAC	GUGCUCUCUCUCUUCUGUCA	Cleavage	seq=cds; coord=4:199278823..199283117:-1; parent_gene=GRMZM2G460544	1
zma-miR156l-5p	gnl|ZmGDB|GRMZM2G126018_T02	1	18.45	1	20	779	798	UGACAGAAGAGAGUGAGCAC	GUGCUCUCUCUCUUCUGUCA	Cleavage	seq=cds; coord=2:189838915..189842817:-1; parent_gene=GRMZM2G126018	1
zma-miR156l-5p	gnl|ZmGDB|GRMZM2G126018_T01	1	18.45	1	20	779	798	UGACAGAAGAGAGUGAGCAC	GUGCUCUCUCUCUUCUGUCA	Cleavage	seq=cds; coord=2:189838793..189842695:-1; parent_gene=GRMZM2G126018	1
zma-miR156l-5p	gnl|ZmGDB|GRMZM2G307588_T01	1	16.689	1	20	764	783	UGACAGAAGAGAGUGAGCAC	GUGCUCUCUCUCUUCUGUCA	Cleavage	seq=cds; coord=7:133170018..133173665:-1; parent_gene=GRMZM2G307588	1
zma-miR156l-5p	gnl|ZmGDB|GRMZM2G106798_T02	1	22.998	1	20	755	774	UGACAGAAGAGAGUGAGCAC	GUGCUCUCUCUCUUCUGUCA	Cleavage	seq=cds; coord=4:17489205..17501119:1; parent_gene=GRMZM2G106798	1
zma-miR156l-5p	gnl|ZmGDB|GRMZM2G106798_T03	1	22.998	1	20	755	774	UGACAGAAGAGAGUGAGCAC	GUGCUCUCUCUCUUCUGUCA	Cleavage	seq=cds; coord=4:17489205..17501119:1; parent_gene=GRMZM2G106798	1
zma-miR159e-5p	gnl|ZmGDB|AC217264.3_FGT005	0	18.857	1	21	1009	1029	CAGCUCCUGCAGCAUCUGUUC	GAACAGAUGCUGCAGGAGCUG	Cleavage	seq=cds; coord=1:246031095..246033561:1; parent_gene=AC217264.3_FG005	1
zma-miR159e-5p	gnl|ZmGDB|GRMZM5G855894_T01	1.5	20.253	1	20	1056	1075	CAGCUCCUGCAGCAUCUGUU	AACAGAUGCUGUUGGAGCUG	Cleavage	seq=cds; coord=4:192257267..192262282:-1; parent_gene=GRMZM5G855894	1
zma-miR159e-5p	gnl|ZmGDB|AC199788.4_FGT001	3	18.575	1	21	8	28	CAGCUCCUGCAGCAUCUGUUC	GAAUAGCUGCUGCAGGUGCUG	Cleavage	seq=cds; coord=2:85460210..85460449:1; parent_gene=AC199788.4_FG001	1
zma-miR159e-5p	gnl|ZmGDB|GRMZM2G082271_T01	2.5	21.196	1	20	2646	2665	CAGCUCCUGCAGCAUCUGUU	AAUGGAUGCUGCAGAAGCUG	Cleavage	seq=cds; coord=10:18124892..18142878:-1; parent_gene=GRMZM2G082271	1
zma-miR159e-5p	gnl|ZmGDB|GRMZM2G432143_T02	3	22.474	1	21	1928	1948	CAGCUCCUGCAGCAUCUGUUC	GAAUAGCUGCUGCAGGUGCUG	Cleavage	seq=cds; coord=9:149898826..149904118:-1; parent_gene=GRMZM2G432143	1
zma-miR159e-3p	gnl|ZmGDB|GRMZM2G070523_T01	0	16.911	1	21	869	889	AUUGGUUUGAAGGGAGCUCCA	UGGAGCUCCCUUCAAACCAAU	Cleavage	seq=cds; coord=5:20197754..20200691:-1; parent_gene=GRMZM2G070523	1
zma-miR159e-3p	gnl|ZmGDB|GRMZM2G070523_T02	0	16.911	1	21	869	889	AUUGGUUUGAAGGGAGCUCCA	UGGAGCUCCCUUCAAACCAAU	Cleavage	seq=cds; coord=5:20199067..20200640:-1; parent_gene=GRMZM2G070523	1
zma-miR159e-3p	gnl|ZmGDB|GRMZM2G070523_T03	0	16.911	1	21	869	889	AUUGGUUUGAAGGGAGCUCCA	UGGAGCUCCCUUCAAACCAAU	Cleavage	seq=cds; coord=5:20197986..20200588:-1; parent_gene=GRMZM2G070523	1
zma-miR159e-3p	gnl|ZmGDB|GRMZM2G085550_T02	2	19.999	1	20	489	508	AUUGGUUUGAAGGGAGCUCC	GGAGCCCCCUUCAAACCAAA	Cleavage	seq=cds; coord=3:3558092..3560574:1; parent_gene=GRMZM2G085550	1
zma-miR159e-3p	gnl|ZmGDB|GRMZM2G161512_T04	2.5	18.596	1	20	735	754	AUUGGUUUGAAGGGAGCUCC	GGAGCUACAUUCGAACCAAU	Cleavage	seq=cds; coord=5:41686328..41688450:1; parent_gene=GRMZM2G161512	1
zma-miR159f-5p	gnl|ZmGDB|GRMZM2G126917_T02	2.5	15.137	1	20	113	132	GAGCUCCUCUCAUUCCAAUG	CAUUGCAAUGGGAGGAGUUU	Cleavage	seq=cds; coord=8:149218592..149220152:1; parent_gene=GRMZM2G126917	1
zma-miR159f-5p	gnl|ZmGDB|GRMZM2G126917_T01	2.5	15.137	1	20	113	132	GAGCUCCUCUCAUUCCAAUG	CAUUGCAAUGGGAGGAGUUU	Cleavage	seq=cds; coord=8:149218592..149219079:1; parent_gene=GRMZM2G126917	1
zma-miR159f-5p	gnl|ZmGDB|GRMZM2G472643_T01	3	23.333	1	20	1217	1236	GAGCUCCUCUCAUUCCAAUG	CGUUCGGGUGGGAGGAGCUC	Cleavage	seq=cds; coord=1:253271966..253273765:1; parent_gene=GRMZM2G472643	1
zma-miR159f-5p	gnl|ZmGDB|GRMZM2G056856_T01	3	18.125	1	20	540	559	GAGCUCCUCUCAUUCCAAUG	GAGUGGAAGGAGAGGAGCUC	Cleavage	seq=cds; coord=8:100476965..100478044:1; parent_gene=GRMZM2G056856	1
zma-miR159f-5p	gnl|ZmGDB|AC195367.3_FGT001	3	23.825	1	20	180	199	GAGCUCCUCUCAUUCCAAUG	CGCUGGGAUCAGAGGAGCUC	Translation	seq=cds; coord=4:111327674..111328183:1; parent_gene=AC195367.3_FG001	1
zma-miR159f-5p	gnl|ZmGDB|GRMZM2G061016_T01	3	22.612	1	20	692	711	GAGCUCCUCUCAUUCCAAUG	CAAGGGAGUGGGAGGAGCUC	Cleavage	seq=cds; coord=4:238310130..238311403:1; parent_gene=GRMZM2G061016	1
zma-miR159f-3p	gnl|ZmGDB|GRMZM2G416652_T01	1	20.367	1	20	798	817	UUUGGAUUGAAGGGAGCUCU	CGAGCUCCCUUCAAUCCAAA	Cleavage	seq=cds; coord=9:90038076..90047250:-1; parent_gene=GRMZM2G416652	1
zma-miR159f-3p	gnl|ZmGDB|GRMZM2G416652_T02	1	20.367	1	20	798	817	UUUGGAUUGAAGGGAGCUCU	CGAGCUCCCUUCAAUCCAAA	Cleavage	seq=cds; coord=9:90038338..90047250:-1; parent_gene=GRMZM2G416652	1
zma-miR159f-3p	gnl|ZmGDB|GRMZM2G167088_T01	1	20.367	1	20	798	817	UUUGGAUUGAAGGGAGCUCU	CGAGCUCCCUUCAAUCCAAA	Cleavage	seq=cds; coord=9:90079570..90086572:-1; parent_gene=GRMZM2G167088	1
zma-miR159f-3p	gnl|ZmGDB|GRMZM2G423833_T01	1.5	16.255	1	21	905	925	UUUGGAUUGAAGGGAGCUCUG	CAGAGAUCCCUUCGAUCCAAA	Cleavage	seq=cds; coord=6:89138035..89141019:-1; parent_gene=GRMZM2G423833	1
zma-miR159f-3p	gnl|ZmGDB|GRMZM2G004090_T01	1.5	20.447	1	20	798	817	UUUGGAUUGAAGGGAGCUCU	CGAGCUCCCUUCAGUCCAAA	Cleavage	seq=cds; coord=9:90125460..90132277:-1; parent_gene=GRMZM2G004090	1
zma-miR159f-3p	gnl|ZmGDB|GRMZM2G093789_T01	2	17.64	1	21	872	892	UUUGGAUUGAAGGGAGCUCUG	CAGAGAUUCCUUCGAUCCAAA	Cleavage	seq=cds; coord=6:89240540..89253660:-1; parent_gene=GRMZM2G093789	1
zma-miR159f-3p	gnl|ZmGDB|GRMZM2G075064_T01	2	18.026	1	21	617	637	UUUGGAUUGAAGGGAGCUCUG	CGGAGAUCCCUUCGAUCCAAA	Cleavage	seq=cds; coord=6:102317765..102320107:-1; parent_gene=GRMZM2G075064	1
zma-miR159f-3p	gnl|ZmGDB|AC209015.3_FGT004	2	13.983	1	21	328	348	UUUGGAUUGAAGGGAGCUCUG	CGGAGAUCCCUUCGAUCCAAA	Cleavage	seq=cds; coord=6:102323695..102324231:-1; parent_gene=AC209015.3_FG004	1
zma-miR159f-3p	gnl|ZmGDB|GRMZM2G139688_T01	2.5	17.184	1	21	977	997	UUUGGAUUGAAGGGAGCUCUG	UGGAGCUCCCUUCACUCCAAG	Cleavage	seq=cds; coord=3:187002242..187006264:-1; parent_gene=GRMZM2G139688	1
zma-miR159f-3p	gnl|ZmGDB|GRMZM2G028054_T02	2	16.122	1	21	971	991	UUUGGAUUGAAGGGAGCUCUG	UGGAGCCCCCUUCAGUCCAAA	Cleavage	seq=cds; coord=8:171172099..171175888:-1; parent_gene=GRMZM2G028054	1
zma-miR159f-3p	gnl|ZmGDB|GRMZM2G028054_T03	2	16.122	1	21	971	991	UUUGGAUUGAAGGGAGCUCUG	UGGAGCCCCCUUCAGUCCAAA	Cleavage	seq=cds; coord=8:171172099..171175888:-1; parent_gene=GRMZM2G028054	1
zma-miR159f-3p	gnl|ZmGDB|GRMZM2G028054_T01	2	16.122	1	21	971	991	UUUGGAUUGAAGGGAGCUCUG	UGGAGCCCCCUUCAGUCCAAA	Cleavage	seq=cds; coord=8:171172057..171175888:-1; parent_gene=GRMZM2G028054	1
zma-miR159f-3p	gnl|ZmGDB|AC204352.3_FGT012	2.5	20.466	1	21	650	670	UUUGGAUUGAAGGGAGCUCUG	CAGAGCACCCUUCAAGCCAAA	Cleavage	seq=cds; coord=6:156830401..156831790:-1; parent_gene=AC204352.3_FG012	1
zma-miR159f-3p	gnl|ZmGDB|GRMZM2G046443_T01	2	24.756	1	21	292	312	UUUGGAUUGAAGGGAGCUCUG	UGGAGCUCCAUUCGAUCCAAA	Cleavage	seq=cds; coord=1:190313406..190314657:1; parent_gene=GRMZM2G046443	1
zma-miR159f-3p	gnl|ZmGDB|GRMZM2G376684_T01	2	13.939	1	21	764	784	UUUGGAUUGAAGGGAGCUCUG	UGGAGAUCCCUUCGAUCCAAA	Cleavage	seq=cds; coord=6:102313193..102315769:-1; parent_gene=GRMZM2G376684	1
zma-miR159f-3p	gnl|ZmGDB|GRMZM2G070523_T01	3	16.911	1	21	869	889	UUUGGAUUGAAGGGAGCUCUG	UGGAGCUCCCUUCAAACCAAU	Cleavage	seq=cds; coord=5:20197754..20200691:-1; parent_gene=GRMZM2G070523	1
zma-miR159f-3p	gnl|ZmGDB|GRMZM2G070523_T03	3	16.911	1	21	869	889	UUUGGAUUGAAGGGAGCUCUG	UGGAGCUCCCUUCAAACCAAU	Cleavage	seq=cds; coord=5:20197986..20200588:-1; parent_gene=GRMZM2G070523	1
zma-miR159f-3p	gnl|ZmGDB|GRMZM2G070523_T02	3	16.911	1	21	869	889	UUUGGAUUGAAGGGAGCUCUG	UGGAGCUCCCUUCAAACCAAU	Cleavage	seq=cds; coord=5:20199067..20200640:-1; parent_gene=GRMZM2G070523	1
zma-miR159f-3p	gnl|ZmGDB|GRMZM2G038195_T02	3	16.182	1	21	841	861	UUUGGAUUGAAGGGAGCUCUG	CAGAACUUCCUUCAAUUCAAC	Cleavage	seq=cds; coord=4:230556482..230569470:1; parent_gene=GRMZM2G038195	1
zma-miR159f-3p	gnl|ZmGDB|GRMZM2G038195_T01	3	16.182	1	21	841	861	UUUGGAUUGAAGGGAGCUCUG	CAGAACUUCCUUCAAUUCAAC	Cleavage	seq=cds; coord=4:230556470..230569433:1; parent_gene=GRMZM2G038195	1
zma-miR159f-3p	gnl|ZmGDB|GRMZM2G085550_T02	3	19.999	1	21	488	508	UUUGGAUUGAAGGGAGCUCUG	CGGAGCCCCCUUCAAACCAAA	Cleavage	seq=cds; coord=3:3558092..3560574:1; parent_gene=GRMZM2G085550	1
zma-miR159g-3p	gnl|ZmGDB|GRMZM2G139688_T01	1.5	17.184	1	21	977	997	UUUGGAGUGAAGGGAGUUCUG	UGGAGCUCCCUUCACUCCAAG	Cleavage	seq=cds; coord=3:187002242..187006264:-1; parent_gene=GRMZM2G139688	1
zma-miR159g-3p	gnl|ZmGDB|GRMZM2G147619_T01	3	17.699	1	21	673	693	UUUGGAGUGAAGGGAGUUCUG	CAGAACUCCCUUCUCUUAAAA	Cleavage	seq=cds; coord=2:51820670..51827266:-1; parent_gene=GRMZM2G147619	1
zma-miR159g-3p	gnl|ZmGDB|GRMZM2G565459_T01	2	3.713	1	20	38	57	UUUGGAGUGAAGGGAGUUCU	AGUACUCCCUUCGUUCCAAA	Cleavage	seq=cds; coord=4:241273386..241273504:-1; parent_gene=GRMZM2G565459	1
zma-miR159g-3p	gnl|ZmGDB|GRMZM2G416652_T01	3	20.367	1	20	798	817	UUUGGAGUGAAGGGAGUUCU	CGAGCUCCCUUCAAUCCAAA	Cleavage	seq=cds; coord=9:90038076..90047250:-1; parent_gene=GRMZM2G416652	1
zma-miR159g-3p	gnl|ZmGDB|GRMZM2G004090_T01	3	20.447	1	20	798	817	UUUGGAGUGAAGGGAGUUCU	CGAGCUCCCUUCAGUCCAAA	Cleavage	seq=cds; coord=9:90125460..90132277:-1; parent_gene=GRMZM2G004090	1
zma-miR159g-3p	gnl|ZmGDB|GRMZM2G416652_T02	3	20.367	1	20	798	817	UUUGGAGUGAAGGGAGUUCU	CGAGCUCCCUUCAAUCCAAA	Cleavage	seq=cds; coord=9:90038338..90047250:-1; parent_gene=GRMZM2G416652	1
zma-miR159g-3p	gnl|ZmGDB|GRMZM2G167088_T01	3	20.367	1	20	798	817	UUUGGAGUGAAGGGAGUUCU	CGAGCUCCCUUCAAUCCAAA	Cleavage	seq=cds; coord=9:90079570..90086572:-1; parent_gene=GRMZM2G167088	1
zma-miR159h-3p	gnl|ZmGDB|GRMZM2G139688_T01	1	17.184	1	21	977	997	UUUGGAGUGAAGGGAGCUCUG	UGGAGCUCCCUUCACUCCAAG	Cleavage	seq=cds; coord=3:187002242..187006264:-1; parent_gene=GRMZM2G139688	1
zma-miR159h-3p	gnl|ZmGDB|GRMZM2G416652_T01	2.5	20.367	1	20	798	817	UUUGGAGUGAAGGGAGCUCU	CGAGCUCCCUUCAAUCCAAA	Cleavage	seq=cds; coord=9:90038076..90047250:-1; parent_gene=GRMZM2G416652	1
zma-miR159h-3p	gnl|ZmGDB|GRMZM2G167088_T01	2.5	20.367	1	20	798	817	UUUGGAGUGAAGGGAGCUCU	CGAGCUCCCUUCAAUCCAAA	Cleavage	seq=cds; coord=9:90079570..90086572:-1; parent_gene=GRMZM2G167088	1
zma-miR159h-3p	gnl|ZmGDB|GRMZM2G004090_T01	2.5	20.447	1	20	798	817	UUUGGAGUGAAGGGAGCUCU	CGAGCUCCCUUCAGUCCAAA	Cleavage	seq=cds; coord=9:90125460..90132277:-1; parent_gene=GRMZM2G004090	1
zma-miR159h-3p	gnl|ZmGDB|GRMZM2G416652_T02	2.5	20.367	1	20	798	817	UUUGGAGUGAAGGGAGCUCU	CGAGCUCCCUUCAAUCCAAA	Cleavage	seq=cds; coord=9:90038338..90047250:-1; parent_gene=GRMZM2G416652	1
zma-miR159h-3p	gnl|ZmGDB|GRMZM2G423833_T01	3	16.255	1	21	905	925	UUUGGAGUGAAGGGAGCUCUG	CAGAGAUCCCUUCGAUCCAAA	Cleavage	seq=cds; coord=6:89138035..89141019:-1; parent_gene=GRMZM2G423833	1
zma-miR159h-3p	gnl|ZmGDB|GRMZM2G016774_T01	3	12.988	1	20	51	70	UUUGGAGUGAAGGGAGCUCU	AGAGUUUUUUUCACUUCAGA	Cleavage	seq=cds; coord=1:297787014..297795600:-1; parent_gene=GRMZM2G016774	1
zma-miR159h-3p	gnl|ZmGDB|GRMZM2G028054_T02	3	16.122	1	21	971	991	UUUGGAGUGAAGGGAGCUCUG	UGGAGCCCCCUUCAGUCCAAA	Cleavage	seq=cds; coord=8:171172099..171175888:-1; parent_gene=GRMZM2G028054	1
zma-miR159h-3p	gnl|ZmGDB|GRMZM2G028054_T03	3	16.122	1	21	971	991	UUUGGAGUGAAGGGAGCUCUG	UGGAGCCCCCUUCAGUCCAAA	Cleavage	seq=cds; coord=8:171172099..171175888:-1; parent_gene=GRMZM2G028054	1
zma-miR159h-3p	gnl|ZmGDB|GRMZM2G028054_T01	3	16.122	1	21	971	991	UUUGGAGUGAAGGGAGCUCUG	UGGAGCCCCCUUCAGUCCAAA	Cleavage	seq=cds; coord=8:171172057..171175888:-1; parent_gene=GRMZM2G028054	1
zma-miR159i-3p	gnl|ZmGDB|GRMZM2G139688_T01	1	17.184	1	21	977	997	UUUGGAGUGAAGGGAGCUCUG	UGGAGCUCCCUUCACUCCAAG	Cleavage	seq=cds; coord=3:187002242..187006264:-1; parent_gene=GRMZM2G139688	1
zma-miR159i-3p	gnl|ZmGDB|GRMZM2G416652_T01	2.5	20.367	1	20	798	817	UUUGGAGUGAAGGGAGCUCU	CGAGCUCCCUUCAAUCCAAA	Cleavage	seq=cds; coord=9:90038076..90047250:-1; parent_gene=GRMZM2G416652	1
zma-miR159i-3p	gnl|ZmGDB|GRMZM2G167088_T01	2.5	20.367	1	20	798	817	UUUGGAGUGAAGGGAGCUCU	CGAGCUCCCUUCAAUCCAAA	Cleavage	seq=cds; coord=9:90079570..90086572:-1; parent_gene=GRMZM2G167088	1
zma-miR159i-3p	gnl|ZmGDB|GRMZM2G004090_T01	2.5	20.447	1	20	798	817	UUUGGAGUGAAGGGAGCUCU	CGAGCUCCCUUCAGUCCAAA	Cleavage	seq=cds; coord=9:90125460..90132277:-1; parent_gene=GRMZM2G004090	1
zma-miR159i-3p	gnl|ZmGDB|GRMZM2G416652_T02	2.5	20.367	1	20	798	817	UUUGGAGUGAAGGGAGCUCU	CGAGCUCCCUUCAAUCCAAA	Cleavage	seq=cds; coord=9:90038338..90047250:-1; parent_gene=GRMZM2G416652	1
zma-miR159i-3p	gnl|ZmGDB|GRMZM2G423833_T01	3	16.255	1	21	905	925	UUUGGAGUGAAGGGAGCUCUG	CAGAGAUCCCUUCGAUCCAAA	Cleavage	seq=cds; coord=6:89138035..89141019:-1; parent_gene=GRMZM2G423833	1
zma-miR159i-3p	gnl|ZmGDB|GRMZM2G016774_T01	3	12.988	1	20	51	70	UUUGGAGUGAAGGGAGCUCU	AGAGUUUUUUUCACUUCAGA	Cleavage	seq=cds; coord=1:297787014..297795600:-1; parent_gene=GRMZM2G016774	1
zma-miR159i-3p	gnl|ZmGDB|GRMZM2G028054_T02	3	16.122	1	21	971	991	UUUGGAGUGAAGGGAGCUCUG	UGGAGCCCCCUUCAGUCCAAA	Cleavage	seq=cds; coord=8:171172099..171175888:-1; parent_gene=GRMZM2G028054	1
zma-miR159i-3p	gnl|ZmGDB|GRMZM2G028054_T03	3	16.122	1	21	971	991	UUUGGAGUGAAGGGAGCUCUG	UGGAGCCCCCUUCAGUCCAAA	Cleavage	seq=cds; coord=8:171172099..171175888:-1; parent_gene=GRMZM2G028054	1
zma-miR159i-3p	gnl|ZmGDB|GRMZM2G028054_T01	3	16.122	1	21	971	991	UUUGGAGUGAAGGGAGCUCUG	UGGAGCCCCCUUCAGUCCAAA	Cleavage	seq=cds; coord=8:171172057..171175888:-1; parent_gene=GRMZM2G028054	1
zma-miR159j-3p	gnl|ZmGDB|GRMZM2G416652_T01	1	20.367	1	20	798	817	UUUGGAUUGAAGGGAGCUCU	CGAGCUCCCUUCAAUCCAAA	Cleavage	seq=cds; coord=9:90038076..90047250:-1; parent_gene=GRMZM2G416652	1
zma-miR159j-3p	gnl|ZmGDB|GRMZM2G416652_T02	1	20.367	1	20	798	817	UUUGGAUUGAAGGGAGCUCU	CGAGCUCCCUUCAAUCCAAA	Cleavage	seq=cds; coord=9:90038338..90047250:-1; parent_gene=GRMZM2G416652	1
zma-miR159j-3p	gnl|ZmGDB|GRMZM2G167088_T01	1	20.367	1	20	798	817	UUUGGAUUGAAGGGAGCUCU	CGAGCUCCCUUCAAUCCAAA	Cleavage	seq=cds; coord=9:90079570..90086572:-1; parent_gene=GRMZM2G167088	1
zma-miR159j-3p	gnl|ZmGDB|GRMZM2G423833_T01	1.5	16.255	1	21	905	925	UUUGGAUUGAAGGGAGCUCUG	CAGAGAUCCCUUCGAUCCAAA	Cleavage	seq=cds; coord=6:89138035..89141019:-1; parent_gene=GRMZM2G423833	1
zma-miR159j-3p	gnl|ZmGDB|GRMZM2G004090_T01	1.5	20.447	1	20	798	817	UUUGGAUUGAAGGGAGCUCU	CGAGCUCCCUUCAGUCCAAA	Cleavage	seq=cds; coord=9:90125460..90132277:-1; parent_gene=GRMZM2G004090	1
zma-miR159j-3p	gnl|ZmGDB|GRMZM2G093789_T01	2	17.64	1	21	872	892	UUUGGAUUGAAGGGAGCUCUG	CAGAGAUUCCUUCGAUCCAAA	Cleavage	seq=cds; coord=6:89240540..89253660:-1; parent_gene=GRMZM2G093789	1
zma-miR159j-3p	gnl|ZmGDB|GRMZM2G075064_T01	2	18.026	1	21	617	637	UUUGGAUUGAAGGGAGCUCUG	CGGAGAUCCCUUCGAUCCAAA	Cleavage	seq=cds; coord=6:102317765..102320107:-1; parent_gene=GRMZM2G075064	1
zma-miR159j-3p	gnl|ZmGDB|AC209015.3_FGT004	2	13.983	1	21	328	348	UUUGGAUUGAAGGGAGCUCUG	CGGAGAUCCCUUCGAUCCAAA	Cleavage	seq=cds; coord=6:102323695..102324231:-1; parent_gene=AC209015.3_FG004	1
zma-miR159j-3p	gnl|ZmGDB|GRMZM2G139688_T01	2.5	17.184	1	21	977	997	UUUGGAUUGAAGGGAGCUCUG	UGGAGCUCCCUUCACUCCAAG	Cleavage	seq=cds; coord=3:187002242..187006264:-1; parent_gene=GRMZM2G139688	1
zma-miR159j-3p	gnl|ZmGDB|GRMZM2G028054_T02	2	16.122	1	21	971	991	UUUGGAUUGAAGGGAGCUCUG	UGGAGCCCCCUUCAGUCCAAA	Cleavage	seq=cds; coord=8:171172099..171175888:-1; parent_gene=GRMZM2G028054	1
zma-miR159j-3p	gnl|ZmGDB|GRMZM2G028054_T03	2	16.122	1	21	971	991	UUUGGAUUGAAGGGAGCUCUG	UGGAGCCCCCUUCAGUCCAAA	Cleavage	seq=cds; coord=8:171172099..171175888:-1; parent_gene=GRMZM2G028054	1
zma-miR159j-3p	gnl|ZmGDB|GRMZM2G028054_T01	2	16.122	1	21	971	991	UUUGGAUUGAAGGGAGCUCUG	UGGAGCCCCCUUCAGUCCAAA	Cleavage	seq=cds; coord=8:171172057..171175888:-1; parent_gene=GRMZM2G028054	1
zma-miR159j-3p	gnl|ZmGDB|AC204352.3_FGT012	2.5	20.466	1	21	650	670	UUUGGAUUGAAGGGAGCUCUG	CAGAGCACCCUUCAAGCCAAA	Cleavage	seq=cds; coord=6:156830401..156831790:-1; parent_gene=AC204352.3_FG012	1
zma-miR159j-3p	gnl|ZmGDB|GRMZM2G046443_T01	2	24.756	1	21	292	312	UUUGGAUUGAAGGGAGCUCUG	UGGAGCUCCAUUCGAUCCAAA	Cleavage	seq=cds; coord=1:190313406..190314657:1; parent_gene=GRMZM2G046443	1
zma-miR159j-3p	gnl|ZmGDB|GRMZM2G376684_T01	2	13.939	1	21	764	784	UUUGGAUUGAAGGGAGCUCUG	UGGAGAUCCCUUCGAUCCAAA	Cleavage	seq=cds; coord=6:102313193..102315769:-1; parent_gene=GRMZM2G376684	1
zma-miR159j-3p	gnl|ZmGDB|GRMZM2G070523_T01	3	16.911	1	21	869	889	UUUGGAUUGAAGGGAGCUCUG	UGGAGCUCCCUUCAAACCAAU	Cleavage	seq=cds; coord=5:20197754..20200691:-1; parent_gene=GRMZM2G070523	1
zma-miR159j-3p	gnl|ZmGDB|GRMZM2G070523_T03	3	16.911	1	21	869	889	UUUGGAUUGAAGGGAGCUCUG	UGGAGCUCCCUUCAAACCAAU	Cleavage	seq=cds; coord=5:20197986..20200588:-1; parent_gene=GRMZM2G070523	1
zma-miR159j-3p	gnl|ZmGDB|GRMZM2G070523_T02	3	16.911	1	21	869	889	UUUGGAUUGAAGGGAGCUCUG	UGGAGCUCCCUUCAAACCAAU	Cleavage	seq=cds; coord=5:20199067..20200640:-1; parent_gene=GRMZM2G070523	1
zma-miR159j-3p	gnl|ZmGDB|GRMZM2G038195_T02	3	16.182	1	21	841	861	UUUGGAUUGAAGGGAGCUCUG	CAGAACUUCCUUCAAUUCAAC	Cleavage	seq=cds; coord=4:230556482..230569470:1; parent_gene=GRMZM2G038195	1
zma-miR159j-3p	gnl|ZmGDB|GRMZM2G038195_T01	3	16.182	1	21	841	861	UUUGGAUUGAAGGGAGCUCUG	CAGAACUUCCUUCAAUUCAAC	Cleavage	seq=cds; coord=4:230556470..230569433:1; parent_gene=GRMZM2G038195	1
zma-miR159j-3p	gnl|ZmGDB|GRMZM2G085550_T02	3	19.999	1	21	488	508	UUUGGAUUGAAGGGAGCUCUG	CGGAGCCCCCUUCAAACCAAA	Cleavage	seq=cds; coord=3:3558092..3560574:1; parent_gene=GRMZM2G085550	1
zma-miR159k-3p	gnl|ZmGDB|GRMZM2G416652_T01	1	20.367	1	20	798	817	UUUGGAUUGAAGGGAGCUCU	CGAGCUCCCUUCAAUCCAAA	Cleavage	seq=cds; coord=9:90038076..90047250:-1; parent_gene=GRMZM2G416652	1
zma-miR159k-3p	gnl|ZmGDB|GRMZM2G416652_T02	1	20.367	1	20	798	817	UUUGGAUUGAAGGGAGCUCU	CGAGCUCCCUUCAAUCCAAA	Cleavage	seq=cds; coord=9:90038338..90047250:-1; parent_gene=GRMZM2G416652	1
zma-miR159k-3p	gnl|ZmGDB|GRMZM2G167088_T01	1	20.367	1	20	798	817	UUUGGAUUGAAGGGAGCUCU	CGAGCUCCCUUCAAUCCAAA	Cleavage	seq=cds; coord=9:90079570..90086572:-1; parent_gene=GRMZM2G167088	1
zma-miR159k-3p	gnl|ZmGDB|GRMZM2G423833_T01	1.5	16.255	1	21	905	925	UUUGGAUUGAAGGGAGCUCUG	CAGAGAUCCCUUCGAUCCAAA	Cleavage	seq=cds; coord=6:89138035..89141019:-1; parent_gene=GRMZM2G423833	1
zma-miR159k-3p	gnl|ZmGDB|GRMZM2G004090_T01	1.5	20.447	1	20	798	817	UUUGGAUUGAAGGGAGCUCU	CGAGCUCCCUUCAGUCCAAA	Cleavage	seq=cds; coord=9:90125460..90132277:-1; parent_gene=GRMZM2G004090	1
zma-miR159k-3p	gnl|ZmGDB|GRMZM2G093789_T01	2	17.64	1	21	872	892	UUUGGAUUGAAGGGAGCUCUG	CAGAGAUUCCUUCGAUCCAAA	Cleavage	seq=cds; coord=6:89240540..89253660:-1; parent_gene=GRMZM2G093789	1
zma-miR159k-3p	gnl|ZmGDB|GRMZM2G075064_T01	2	18.026	1	21	617	637	UUUGGAUUGAAGGGAGCUCUG	CGGAGAUCCCUUCGAUCCAAA	Cleavage	seq=cds; coord=6:102317765..102320107:-1; parent_gene=GRMZM2G075064	1
zma-miR159k-3p	gnl|ZmGDB|AC209015.3_FGT004	2	13.983	1	21	328	348	UUUGGAUUGAAGGGAGCUCUG	CGGAGAUCCCUUCGAUCCAAA	Cleavage	seq=cds; coord=6:102323695..102324231:-1; parent_gene=AC209015.3_FG004	1
zma-miR159k-3p	gnl|ZmGDB|GRMZM2G139688_T01	2.5	17.184	1	21	977	997	UUUGGAUUGAAGGGAGCUCUG	UGGAGCUCCCUUCACUCCAAG	Cleavage	seq=cds; coord=3:187002242..187006264:-1; parent_gene=GRMZM2G139688	1
zma-miR159k-3p	gnl|ZmGDB|GRMZM2G028054_T02	2	16.122	1	21	971	991	UUUGGAUUGAAGGGAGCUCUG	UGGAGCCCCCUUCAGUCCAAA	Cleavage	seq=cds; coord=8:171172099..171175888:-1; parent_gene=GRMZM2G028054	1
zma-miR159k-3p	gnl|ZmGDB|GRMZM2G028054_T03	2	16.122	1	21	971	991	UUUGGAUUGAAGGGAGCUCUG	UGGAGCCCCCUUCAGUCCAAA	Cleavage	seq=cds; coord=8:171172099..171175888:-1; parent_gene=GRMZM2G028054	1
zma-miR159k-3p	gnl|ZmGDB|GRMZM2G028054_T01	2	16.122	1	21	971	991	UUUGGAUUGAAGGGAGCUCUG	UGGAGCCCCCUUCAGUCCAAA	Cleavage	seq=cds; coord=8:171172057..171175888:-1; parent_gene=GRMZM2G028054	1
zma-miR159k-3p	gnl|ZmGDB|AC204352.3_FGT012	2.5	20.466	1	21	650	670	UUUGGAUUGAAGGGAGCUCUG	CAGAGCACCCUUCAAGCCAAA	Cleavage	seq=cds; coord=6:156830401..156831790:-1; parent_gene=AC204352.3_FG012	1
zma-miR159k-3p	gnl|ZmGDB|GRMZM2G046443_T01	2	24.756	1	21	292	312	UUUGGAUUGAAGGGAGCUCUG	UGGAGCUCCAUUCGAUCCAAA	Cleavage	seq=cds; coord=1:190313406..190314657:1; parent_gene=GRMZM2G046443	1
zma-miR159k-3p	gnl|ZmGDB|GRMZM2G376684_T01	2	13.939	1	21	764	784	UUUGGAUUGAAGGGAGCUCUG	UGGAGAUCCCUUCGAUCCAAA	Cleavage	seq=cds; coord=6:102313193..102315769:-1; parent_gene=GRMZM2G376684	1
zma-miR159k-3p	gnl|ZmGDB|GRMZM2G070523_T01	3	16.911	1	21	869	889	UUUGGAUUGAAGGGAGCUCUG	UGGAGCUCCCUUCAAACCAAU	Cleavage	seq=cds; coord=5:20197754..20200691:-1; parent_gene=GRMZM2G070523	1
zma-miR159k-3p	gnl|ZmGDB|GRMZM2G070523_T03	3	16.911	1	21	869	889	UUUGGAUUGAAGGGAGCUCUG	UGGAGCUCCCUUCAAACCAAU	Cleavage	seq=cds; coord=5:20197986..20200588:-1; parent_gene=GRMZM2G070523	1
zma-miR159k-3p	gnl|ZmGDB|GRMZM2G070523_T02	3	16.911	1	21	869	889	UUUGGAUUGAAGGGAGCUCUG	UGGAGCUCCCUUCAAACCAAU	Cleavage	seq=cds; coord=5:20199067..20200640:-1; parent_gene=GRMZM2G070523	1
zma-miR159k-3p	gnl|ZmGDB|GRMZM2G038195_T02	3	16.182	1	21	841	861	UUUGGAUUGAAGGGAGCUCUG	CAGAACUUCCUUCAAUUCAAC	Cleavage	seq=cds; coord=4:230556482..230569470:1; parent_gene=GRMZM2G038195	1
zma-miR159k-3p	gnl|ZmGDB|GRMZM2G038195_T01	3	16.182	1	21	841	861	UUUGGAUUGAAGGGAGCUCUG	CAGAACUUCCUUCAAUUCAAC	Cleavage	seq=cds; coord=4:230556470..230569433:1; parent_gene=GRMZM2G038195	1
zma-miR159k-3p	gnl|ZmGDB|GRMZM2G085550_T02	3	19.999	1	21	488	508	UUUGGAUUGAAGGGAGCUCUG	CGGAGCCCCCUUCAAACCAAA	Cleavage	seq=cds; coord=3:3558092..3560574:1; parent_gene=GRMZM2G085550	1
zma-miR160g-5p	gnl|ZmGDB|GRMZM2G567718_T01	0	12.852	1	21	6	26	UGCCUGGCUCCCUGUAUGCCA	UGGCAUACAGGGAGCCAGGCA	Cleavage	seq=cds; coord=6:9144425..9144859:-1; parent_gene=GRMZM2G567718	1
zma-miR160g-5p	gnl|ZmGDB|GRMZM2G159399_T01	0	21.942	1	20	1315	1334	UGCCUGGCUCCCUGUAUGCC	GGCAUACAGGGAGCCAGGCA	Cleavage	seq=cds; coord=5:27944757..27949513:-1; parent_gene=GRMZM2G159399	1
zma-miR160g-5p	gnl|ZmGDB|AC207656.3_FGT002	0	24.063	1	20	1351	1370	UGCCUGGCUCCCUGUAUGCC	GGCAUACAGGGAGCCAGGCA	Cleavage	seq=cds; coord=5:49253260..49255662:1; parent_gene=AC207656.3_FG002	1
zma-miR160g-5p	gnl|ZmGDB|AC207885.3_FGT009	1	24.092	1	20	484	503	UGCCUGGCUCCCUGUAUGCC	GGCAUACUGGGAGCCAGGCA	Cleavage	seq=cds; coord=2:168321269..168322176:-1; parent_gene=AC207885.3_FG009	1
zma-miR160g-5p	gnl|ZmGDB|GRMZM2G081406_T01	1	22.146	1	20	1372	1391	UGCCUGGCUCCCUGUAUGCC	GCCAUACAGGGAGCCAGGCA	Cleavage	seq=cds; coord=4:143802561..143805351:1; parent_gene=GRMZM2G081406	1
zma-miR160g-5p	gnl|ZmGDB|GRMZM2G481360_T01	1.5	19.367	1	20	1260	1279	UGCCUGGCUCCCUGUAUGCC	GGCAUCCGGGGAGCCAGGCA	Cleavage	seq=cds; coord=10:125546366..125549564:1; parent_gene=GRMZM2G481360	1
zma-miR160g-5p	gnl|ZmGDB|GRMZM2G458180_T01	1.5	17.352	1	20	1422	1441	UGCCUGGCUCCCUGUAUGCC	GGCAUCCGGGGAGCCAGGCA	Cleavage	seq=cds; coord=3:109713094..109716519:-1; parent_gene=GRMZM2G458180	1
zma-miR160g-5p	gnl|ZmGDB|GRMZM2G162809_T01	2.5	18.64	1	20	437	456	UGCCUGGCUCCCUGUAUGCC	AGCGUACAGUGAGCCAGGCA	Translation	seq=cds; coord=5:189764162..189765024:-1; parent_gene=GRMZM2G162809	1
zma-miR160g-5p	gnl|ZmGDB|GRMZM2G077386_T01	2.5	18.446	1	20	131	150	UGCCUGGCUCCCUGUAUGCC	GGCGUACAUUGAGCCAGGCA	Translation	seq=cds; coord=7:134316140..134316558:1; parent_gene=GRMZM2G077386	1
zma-miR160g-5p	gnl|ZmGDB|GRMZM5G861501_T01	3	22.084	1	20	502	521	UGCCUGGCUCCCUGUAUGCC	GGCAUGGAGGGAGCCAAGCA	Cleavage	seq=cds; coord=9:9361617..9363747:-1; parent_gene=GRMZM5G861501	1
zma-miR160g-3p	gnl|ZmGDB|GRMZM2G430224_T01	2.5	16.871	1	21	309	329	GCGUGCAAGGAGCCAAGCAUG	CAUGCUCCGCUCCUUGUACGC	Cleavage	seq=cds; coord=5:145334846..145337513:-1; parent_gene=GRMZM2G430224	1
zma-miR160g-3p	gnl|ZmGDB|AC205552.3_FGT003	2.5	16.871	1	21	309	329	GCGUGCAAGGAGCCAAGCAUG	CAUGCUCCGCUCCUUGUACGC	Cleavage	seq=cds; coord=4:135373558..135374737:1; parent_gene=AC205552.3_FG003	1
zma-miR160g-3p	gnl|ZmGDB|GRMZM2G703085_T01	3	14.64	1	21	131	151	GCGUGCAAGGAGCCAAGCAUG	CGUGUUUGGUUCGUUGUACGC	Translation	seq=cds; coord=2:74076783..74078313:1; parent_gene=GRMZM2G703085	1
zma-miR160g-3p	gnl|ZmGDB|GRMZM2G156162_T06	3	24.707	1	21	388	408	GCGUGCAAGGAGCCAAGCAUG	CAUGCUUCACUCCUUGCAUGU	Cleavage	seq=cds; coord=6:87797801..87803051:-1; parent_gene=GRMZM2G156162	1
zma-miR160g-3p	gnl|ZmGDB|GRMZM2G156162_T02	3	24.707	1	21	388	408	GCGUGCAAGGAGCCAAGCAUG	CAUGCUUCACUCCUUGCAUGU	Cleavage	seq=cds; coord=6:87797801..87803088:-1; parent_gene=GRMZM2G156162	1
zma-miR160g-3p	gnl|ZmGDB|GRMZM2G156162_T01	3	24.707	1	21	388	408	GCGUGCAAGGAGCCAAGCAUG	CAUGCUUCACUCCUUGCAUGU	Cleavage	seq=cds; coord=6:87797801..87803088:-1; parent_gene=GRMZM2G156162	1
zma-miR160g-3p	gnl|ZmGDB|GRMZM5G832381_T01	3	21.957	1	21	440	460	GCGUGCAAGGAGCCAAGCAUG	CGAGCUUGGCUCCGUGCGCGC	Cleavage	seq=cds; coord=5:70548256..70549346:-1; parent_gene=GRMZM5G832381	1
zma-miR160g-3p	gnl|ZmGDB|GRMZM2G149211_T01	3	17.879	1	20	799	818	GCGUGCAAGGAGCCAAGCAU	AUGCUAGGUGCCUUGCAUGC	Translation	seq=cds; coord=8:114426296..114431050:-1; parent_gene=GRMZM2G149211	1
zma-miR160g-3p	gnl|ZmGDB|GRMZM2G035298_T02	3	17.717	1	20	799	818	GCGUGCAAGGAGCCAAGCAU	AUGCUAGGUGCCUUGCAUGC	Translation	seq=cds; coord=6:144337071..144376854:-1; parent_gene=GRMZM2G035298	1
zma-miR164e-5p	gnl|ZmGDB|GRMZM5G858794_T01	3	12.221	1	21	305	325	UGGAGAAGCAGGACACGUGAG	CUUGCGUGUUUUGCUUCUCCC	Cleavage	seq=cds; coord=2:145775136..145776580:-1; parent_gene=GRMZM5G858794	1
zma-miR164e-5p	gnl|ZmGDB|GRMZM2G146380_T01	2	17.042	1	21	434	454	UGGAGAAGCAGGACACGUGAG	CACACGUGACCUGCUUCUCCA	Cleavage	seq=cds; coord=5:176939481..176940584:-1; parent_gene=GRMZM2G146380	1
zma-miR164e-5p	gnl|ZmGDB|GRMZM2G333878_T01	2.5	13.72	1	21	1994	2014	UGGAGAAGCAGGACACGUGAG	CUCUCGUGUUCUUCUUCUCCA	Translation	seq=cds; coord=5:165748651..165751693:1; parent_gene=GRMZM2G333878	1
zma-miR164e-5p	gnl|ZmGDB|GRMZM2G011156_T01	3	18.491	1	20	714	733	UGGAGAAGCAGGACACGUGA	CUACGUGUACUGCUUCUCCG	Cleavage	seq=cds; coord=5:20833244..20835065:-1; parent_gene=GRMZM2G011156	1
zma-miR164e-5p	gnl|ZmGDB|GRMZM2G101033_T01	3	17.548	1	20	380	399	UGGAGAAGCAGGACACGUGA	GCAUGUCUUCUGCUUCUCCA	Cleavage	seq=cds; coord=8:158564706..158565559:1; parent_gene=GRMZM2G101033	1
zma-miR164e-5p	gnl|ZmGDB|GRMZM2G125424_T04	3	21.079	1	21	2858	2878	UGGAGAAGCAGGACACGUGAG	CCCACGUGUCCACCUUCUCCA	Translation	seq=cds; coord=10:122251809..122258626:-1; parent_gene=GRMZM2G125424	1
zma-miR164e-5p	gnl|ZmGDB|GRMZM2G125424_T03	3	21.079	1	21	1532	1552	UGGAGAAGCAGGACACGUGAG	CCCACGUGUCCACCUUCUCCA	Translation	seq=cds; coord=10:122251809..122257016:-1; parent_gene=GRMZM2G125424	1
zma-miR164e-5p	gnl|ZmGDB|GRMZM2G125424_T02	3	21.079	1	21	387	407	UGGAGAAGCAGGACACGUGAG	CCCACGUGUCCACCUUCUCCA	Translation	seq=cds; coord=10:122251809..122253789:-1; parent_gene=GRMZM2G125424	1
zma-miR164e-5p	gnl|ZmGDB|GRMZM2G003342_T01	3	24.027	1	21	386	406	UGGAGAAGCAGGACACGUGAG	CUGUCGAGUCCUGCUUCUCCA	Cleavage	seq=cds; coord=7:118618791..118624358:1; parent_gene=GRMZM2G003342	1
zma-miR164e-5p	gnl|ZmGDB|GRMZM2G125424_T01	3	21.079	1	21	279	299	UGGAGAAGCAGGACACGUGAG	CCCACGUGUCCACCUUCUCCA	Translation	seq=cds; coord=10:122251809..122253616:-1; parent_gene=GRMZM2G125424	1
zma-miR164e-5p	gnl|ZmGDB|GRMZM2G003342_T02	3	24.027	1	21	287	307	UGGAGAAGCAGGACACGUGAG	CUGUCGAGUCCUGCUUCUCCA	Cleavage	seq=cds; coord=7:118618791..118624354:1; parent_gene=GRMZM2G003342	1
zma-miR164e-5p	gnl|ZmGDB|GRMZM2G003342_T03	3	24.027	1	21	287	307	UGGAGAAGCAGGACACGUGAG	CUGUCGAGUCCUGCUUCUCCA	Cleavage	seq=cds; coord=7:118618791..118624354:1; parent_gene=GRMZM2G003342	1
zma-miR164e-5p	gnl|ZmGDB|GRMZM2G003342_T05	3	24.027	1	21	287	307	UGGAGAAGCAGGACACGUGAG	CUGUCGAGUCCUGCUUCUCCA	Cleavage	seq=cds; coord=7:118618849..118624237:1; parent_gene=GRMZM2G003342	1
zma-miR164e-3p	gnl|ZmGDB|GRMZM2G078806_T05	3	17.543	1	21	342	362	CAUGUGUCCGCCCUCUCCACC	GGUGGAGAGGAAGGACACAUU	Translation	seq=cds; coord=1:66015021..66017039:-1; parent_gene=GRMZM2G078806	1
zma-miR164e-3p	gnl|ZmGDB|GRMZM2G078806_T03	3	24.087	1	21	330	350	CAUGUGUCCGCCCUCUCCACC	GGUGGAGAGGAAGGACACAUU	Translation	seq=cds; coord=1:66013048..66017039:-1; parent_gene=GRMZM2G078806	1
zma-miR164e-3p	gnl|ZmGDB|GRMZM2G078806_T02	3	19.333	1	21	342	362	CAUGUGUCCGCCCUCUCCACC	GGUGGAGAGGAAGGACACAUU	Translation	seq=cds; coord=1:66013048..66017039:-1; parent_gene=GRMZM2G078806	1
zma-miR164e-3p	gnl|ZmGDB|AC233936.1_FGT002	3	11.783	1	20	391	410	CAUGUGUCCGCCCUCUCCAC	GUGGAGAGGGAGGGCACAAG	Translation	seq=cds; coord=6:96152276..96152824:1; parent_gene=AC233936.1_FG002	1
zma-miR164f-5p	gnl|ZmGDB|GRMZM2G139700_T01	1	20.392	1	21	737	757	UGGAGAAGCAGGGCACGUGCU	AGCUCGUGCCCUGCUUCUCCA	Cleavage	seq=cds; coord=3:137579039..137580848:1; parent_gene=GRMZM2G139700	1
zma-miR164f-5p	gnl|ZmGDB|GRMZM2G393433_T02	1	17.089	1	21	758	778	UGGAGAAGCAGGGCACGUGCU	AGCUCGUGCCCUGCUUCUCCA	Cleavage	seq=cds; coord=6:16291162..16293314:-1; parent_gene=GRMZM2G393433	1
zma-miR164f-5p	gnl|ZmGDB|GRMZM2G393433_T01	1	17.089	1	21	755	775	UGGAGAAGCAGGGCACGUGCU	AGCUCGUGCCCUGCUUCUCCA	Cleavage	seq=cds; coord=6:16291273..16293492:-1; parent_gene=GRMZM2G393433	1
zma-miR164f-5p	gnl|ZmGDB|GRMZM2G114850_T01	1	20.062	1	21	698	718	UGGAGAAGCAGGGCACGUGCU	AGCAGGUGCCCUGCUUCUCCA	Cleavage	seq=cds; coord=3:122071793..122076122:1; parent_gene=GRMZM2G114850	1
zma-miR164f-5p	gnl|ZmGDB|GRMZM2G063522_T01	1	19.743	1	21	659	679	UGGAGAAGCAGGGCACGUGCU	AGCAAGUGCCCUGCUUCUCCA	Cleavage	seq=cds; coord=5:43417416..43421787:-1; parent_gene=GRMZM2G063522	1
zma-miR164f-5p	gnl|ZmGDB|GRMZM2G101033_T01	2.5	17.548	1	21	379	399	UGGAGAAGCAGGGCACGUGCU	AGCAUGUCUUCUGCUUCUCCA	Cleavage	seq=cds; coord=8:158564706..158565559:1; parent_gene=GRMZM2G101033	1
zma-miR164f-5p	gnl|ZmGDB|GRMZM2G146380_T01	2	17.042	1	20	435	454	UGGAGAAGCAGGGCACGUGC	ACACGUGACCUGCUUCUCCA	Cleavage	seq=cds; coord=5:176939481..176940584:-1; parent_gene=GRMZM2G146380	1
zma-miR164f-5p	gnl|ZmGDB|GRMZM2G078024_T01	3	21.573	1	20	159	178	UGGAGAAGCAGGGCACGUGC	CUACGUGCUCAGCUUCUCCA	Translation	seq=cds; coord=3:164586526..164589297:-1; parent_gene=GRMZM2G078024	1
zma-miR164f-5p	gnl|ZmGDB|GRMZM2G022616_T01	3	20.94	1	20	945	964	UGGAGAAGCAGGGCACGUGC	CUACGUCCCCUGUUUCUCCA	Cleavage	seq=cds; coord=7:13604004..13605630:-1; parent_gene=GRMZM2G022616	1
zma-miR164f-3p	gnl|ZmGDB|GRMZM2G342807_T01	2	18.332	1	21	580	600	CACGUGCGCUCCUUCUCCAAC	GUUGGGGAAGAAGCGUACGUG	Translation	seq=cds; coord=9:152823247..152827092:1; parent_gene=GRMZM2G342807	1
zma-miR164f-3p	gnl|ZmGDB|GRMZM5G810245_T01	2.5	10.367	1	20	165	184	CACGUGCGCUCCUUCUCCAA	GAGGAGGAGGAGCGCACGUG	Cleavage	seq=cds; coord=1:85134183..85134373:1; parent_gene=GRMZM5G810245	1
zma-miR164f-3p	gnl|ZmGDB|GRMZM2G701888_T01	2	16.025	1	20	80	99	CACGUGCGCUCCUUCUCCAA	UGGGAGAGGGAGCGUACGUG	Cleavage	seq=cds; coord=5:152158341..152159047:-1; parent_gene=GRMZM2G701888	1
zma-miR164f-3p	gnl|ZmGDB|GRMZM5G805434_T01	2	14.999	1	20	192	211	CACGUGCGCUCCUUCUCCAA	UGGGAGAGGGAGCGUACGUG	Cleavage	seq=cds; coord=1:127667129..127667575:1; parent_gene=GRMZM5G805434	1
zma-miR164f-3p	gnl|ZmGDB|GRMZM5G802679_T01	2	16.025	1	20	80	99	CACGUGCGCUCCUUCUCCAA	UGGGAGAGGGAGCGUACGUG	Cleavage	seq=cds; coord=9:53552515..53553001:1; parent_gene=GRMZM5G802679	1
zma-miR164f-3p	gnl|ZmGDB|GRMZM5G865247_T01	2	13.698	1	20	192	211	CACGUGCGCUCCUUCUCCAA	UGGGAGAGGGAGCGUACGUG	Cleavage	seq=cds; coord=4:27646757..27647203:-1; parent_gene=GRMZM5G865247	1
zma-miR164f-3p	gnl|ZmGDB|GRMZM5G803787_T01	2	14.465	1	20	216	235	CACGUGCGCUCCUUCUCCAA	UGGGAGAGGGAGCGUACGUG	Cleavage	seq=cds; coord=4:27638224..27638694:-1; parent_gene=GRMZM5G803787	1
zma-miR164f-3p	gnl|ZmGDB|GRMZM2G039948_T01	2	14.448	1	20	80	99	CACGUGCGCUCCUUCUCCAA	UGGGAGAGGGAGCGUACGUG	Cleavage	seq=cds; coord=5:152149623..152150451:-1; parent_gene=GRMZM2G039948	1
zma-miR164f-3p	gnl|ZmGDB|GRMZM2G354500_T01	3	20.382	1	21	139	159	CACGUGCGCUCCUUCUCCAAC	GCUGGAGAAGGAGCACAUGUG	Cleavage	seq=cds; coord=4:54082562..54083083:-1; parent_gene=GRMZM2G354500	1
zma-miR164f-3p	gnl|ZmGDB|GRMZM2G423351_T01	3	18.935	1	21	130	150	CACGUGCGCUCCUUCUCCAAC	GCUGGAGAAGGAGCACAUGUG	Cleavage	seq=cds; coord=5:170185626..170186074:-1; parent_gene=GRMZM2G423351	1
zma-miR164f-3p	gnl|ZmGDB|GRMZM2G574534_T02	2.5	22.54	1	20	67	86	CACGUGCGCUCCUUCUCCAA	GUGGAGGAGGAGCGCGUGUG	Cleavage	seq=cds; coord=1:288928378..288931004:1; parent_gene=GRMZM2G574534	1
zma-miR164f-3p	gnl|ZmGDB|GRMZM5G883034_T01	2.5	16.587	1	20	1	20	CACGUGCGCUCCUUCUCCAA	AUGGACAAGGAGCGCGCGUG	Cleavage	seq=cds; coord=8:22022395..22022652:-1; parent_gene=GRMZM5G883034	1
zma-miR164f-3p	gnl|ZmGDB|GRMZM2G309782_T01	3	13.534	1	21	550	570	CACGUGCGCUCCUUCUCCAAC	GCUGGAGAAGGAGCACAUGUG	Cleavage	seq=cds; coord=1:20652802..20654431:-1; parent_gene=GRMZM2G309782	1
zma-miR164g-5p	gnl|ZmGDB|GRMZM2G139700_T01	1	20.392	1	20	738	757	UGGAGAAGCAGGGCACGUGC	GCUCGUGCCCUGCUUCUCCA	Cleavage	seq=cds; coord=3:137579039..137580848:1; parent_gene=GRMZM2G139700	1
zma-miR164g-5p	gnl|ZmGDB|GRMZM2G393433_T02	1	17.089	1	20	759	778	UGGAGAAGCAGGGCACGUGC	GCUCGUGCCCUGCUUCUCCA	Cleavage	seq=cds; coord=6:16291162..16293314:-1; parent_gene=GRMZM2G393433	1
zma-miR164g-5p	gnl|ZmGDB|GRMZM2G393433_T01	1	17.089	1	20	756	775	UGGAGAAGCAGGGCACGUGC	GCUCGUGCCCUGCUUCUCCA	Cleavage	seq=cds; coord=6:16291273..16293492:-1; parent_gene=GRMZM2G393433	1
zma-miR164g-5p	gnl|ZmGDB|GRMZM2G114850_T01	1	20.062	1	20	699	718	UGGAGAAGCAGGGCACGUGC	GCAGGUGCCCUGCUUCUCCA	Cleavage	seq=cds; coord=3:122071793..122076122:1; parent_gene=GRMZM2G114850	1
zma-miR164g-5p	gnl|ZmGDB|GRMZM2G063522_T01	1	19.743	1	20	660	679	UGGAGAAGCAGGGCACGUGC	GCAAGUGCCCUGCUUCUCCA	Cleavage	seq=cds; coord=5:43417416..43421787:-1; parent_gene=GRMZM2G063522	1
zma-miR164g-5p	gnl|ZmGDB|GRMZM2G146380_T01	2	17.042	1	20	435	454	UGGAGAAGCAGGGCACGUGC	ACACGUGACCUGCUUCUCCA	Cleavage	seq=cds; coord=5:176939481..176940584:-1; parent_gene=GRMZM2G146380	1
zma-miR164g-5p	gnl|ZmGDB|GRMZM2G058494_T01	2.5	23.502	1	21	37	57	UGGAGAAGCAGGGCACGUGCA	UGGACGUGCUCUCCUUCUCCA	Translation	seq=cds; coord=7:139562397..139563319:-1; parent_gene=GRMZM2G058494	1
zma-miR164g-5p	gnl|ZmGDB|GRMZM2G101033_T01	2.5	17.548	1	20	380	399	UGGAGAAGCAGGGCACGUGC	GCAUGUCUUCUGCUUCUCCA	Cleavage	seq=cds; coord=8:158564706..158565559:1; parent_gene=GRMZM2G101033	1
zma-miR164g-5p	gnl|ZmGDB|GRMZM2G011553_T01	3	19.012	1	21	497	517	UGGAGAAGCAGGGCACGUGCA	UGCGCCUGCCCUCCUUCUCCG	Translation	seq=cds; coord=3:1677728..1678921:-1; parent_gene=GRMZM2G011553	1
zma-miR164g-3p	gnl|ZmGDB|GRMZM2G396601_T01	3	23.937	1	21	273	293	CACGUGCUCCCCUUCUCCACC	GGUUGGGAAGGGGAGCACGGG	Cleavage	seq=cds; coord=5:178043944..178044240:-1; parent_gene=GRMZM2G396601	1
zma-miR164g-3p	gnl|ZmGDB|AC193754.3_FGT004	3	20.701	1	20	242	261	CACGUGCUCCCCUUCUCCAC	GUGGGGGAGGGGAGCGUGUC	Cleavage	seq=cds; coord=2:36002445..36002732:-1; parent_gene=AC193754.3_FG004	1
zma-miR164h-5p	gnl|ZmGDB|GRMZM2G146380_T01	1	17.042	1	21	434	454	UGGAGAAGCAGGGCACGUGUG	CACACGUGACCUGCUUCUCCA	Cleavage	seq=cds; coord=5:176939481..176940584:-1; parent_gene=GRMZM2G146380	1
zma-miR164h-5p	gnl|ZmGDB|GRMZM2G139700_T01	1.5	20.392	1	20	738	757	UGGAGAAGCAGGGCACGUGU	GCUCGUGCCCUGCUUCUCCA	Cleavage	seq=cds; coord=3:137579039..137580848:1; parent_gene=GRMZM2G139700	1
zma-miR164h-5p	gnl|ZmGDB|GRMZM2G393433_T02	1.5	17.089	1	20	759	778	UGGAGAAGCAGGGCACGUGU	GCUCGUGCCCUGCUUCUCCA	Cleavage	seq=cds; coord=6:16291162..16293314:-1; parent_gene=GRMZM2G393433	1
zma-miR164h-5p	gnl|ZmGDB|GRMZM2G393433_T01	1.5	17.089	1	20	756	775	UGGAGAAGCAGGGCACGUGU	GCUCGUGCCCUGCUUCUCCA	Cleavage	seq=cds; coord=6:16291273..16293492:-1; parent_gene=GRMZM2G393433	1
zma-miR164h-5p	gnl|ZmGDB|GRMZM2G114850_T01	1.5	20.062	1	20	699	718	UGGAGAAGCAGGGCACGUGU	GCAGGUGCCCUGCUUCUCCA	Cleavage	seq=cds; coord=3:122071793..122076122:1; parent_gene=GRMZM2G114850	1
zma-miR164h-5p	gnl|ZmGDB|GRMZM2G063522_T01	1.5	19.743	1	20	660	679	UGGAGAAGCAGGGCACGUGU	GCAAGUGCCCUGCUUCUCCA	Cleavage	seq=cds; coord=5:43417416..43421787:-1; parent_gene=GRMZM2G063522	1
zma-miR164h-5p	gnl|ZmGDB|GRMZM2G117836_T01	3	21.182	1	21	245	265	UGGAGAAGCAGGGCACGUGUG	CACUCGAGCUCUGCUUCUCCG	Cleavage	seq=cds; coord=10:53478171..53482054:1; parent_gene=GRMZM2G117836	1
zma-miR164h-5p	gnl|ZmGDB|GRMZM2G078024_T01	3	21.573	1	21	158	178	UGGAGAAGCAGGGCACGUGUG	CCUACGUGCUCAGCUUCUCCA	Translation	seq=cds; coord=3:164586526..164589297:-1; parent_gene=GRMZM2G078024	1
zma-miR164h-5p	gnl|ZmGDB|GRMZM2G096358_T01	3	22.616	1	21	698	718	UGGAGAAGCAGGGCACGUGUG	CGCCGGUGCCCUGCUUCUCCG	Cleavage	seq=cds; coord=8:11483831..11485664:-1; parent_gene=GRMZM2G096358	1
zma-miR164h-5p	gnl|ZmGDB|GRMZM2G022616_T01	3	20.94	1	21	944	964	UGGAGAAGCAGGGCACGUGUG	CCUACGUCCCCUGUUUCUCCA	Cleavage	seq=cds; coord=7:13604004..13605630:-1; parent_gene=GRMZM2G022616	1
zma-miR164h-5p	gnl|ZmGDB|GRMZM2G088028_T01	3	22.704	1	21	537	557	UGGAGAAGCAGGGCACGUGUG	CACGAGUGCUAUGCUUCUCCA	Translation	seq=cds; coord=5:37226131..37228257:-1; parent_gene=GRMZM2G088028	1
zma-miR164h-5p	gnl|ZmGDB|GRMZM2G088028_T02	3	22.704	1	21	471	491	UGGAGAAGCAGGGCACGUGUG	CACGAGUGCUAUGCUUCUCCA	Translation	seq=cds; coord=5:37226131..37228257:-1; parent_gene=GRMZM2G088028	1
zma-miR164h-3p	gnl|ZmGDB|GRMZM5G883034_T01	3	17.852	1	21	21	41	CAUGUGCCCUUCUUCUCCAUC	GGUGGGCGAGGAGGGCACAUG	Cleavage	seq=cds; coord=8:22022395..22022652:-1; parent_gene=GRMZM5G883034	1
zma-miR164h-3p	gnl|ZmGDB|GRMZM2G012584_T02	2.5	19.237	1	20	1	20	CAUGUGCCCUUCUUCUCCAU	AUGGGGAAGAAGGGCAAGUG	Cleavage	seq=cds; coord=8:131678500..131682270:-1; parent_gene=GRMZM2G012584	1
zma-miR164h-3p	gnl|ZmGDB|GRMZM2G012584_T01	2.5	19.237	1	20	1	20	CAUGUGCCCUUCUUCUCCAU	AUGGGGAAGAAGGGCAAGUG	Cleavage	seq=cds; coord=8:131678500..131682399:-1; parent_gene=GRMZM2G012584	1
zma-miR164h-3p	gnl|ZmGDB|GRMZM5G826979_T01	2.5	18.454	1	20	1	20	CAUGUGCCCUUCUUCUCCAU	AUGGGGAAGAAGGGCAAGUG	Cleavage	seq=cds; coord=6:27902005..27905819:-1; parent_gene=GRMZM5G826979	1
zma-miR164h-3p	gnl|ZmGDB|GRMZM5G826979_T05	2.5	18.454	1	20	1	20	CAUGUGCCCUUCUUCUCCAU	AUGGGGAAGAAGGGCAAGUG	Cleavage	seq=cds; coord=6:27902005..27906109:-1; parent_gene=GRMZM5G826979	1
zma-miR164h-3p	gnl|ZmGDB|GRMZM5G826979_T04	2.5	18.454	1	20	1	20	CAUGUGCCCUUCUUCUCCAU	AUGGGGAAGAAGGGCAAGUG	Cleavage	seq=cds; coord=6:27902005..27906109:-1; parent_gene=GRMZM5G826979	1
zma-miR164h-3p	gnl|ZmGDB|GRMZM5G826979_T03	2.5	18.454	1	20	1	20	CAUGUGCCCUUCUUCUCCAU	AUGGGGAAGAAGGGCAAGUG	Cleavage	seq=cds; coord=6:27902005..27906109:-1; parent_gene=GRMZM5G826979	1
zma-miR164h-3p	gnl|ZmGDB|GRMZM2G700716_T01	3	19.433	1	20	779	798	CAUGUGCCCUUCUUCUCCAU	UCGGAGGAGGAGGGCACAUG	Cleavage	seq=cds; coord=8:153480244..153485672:-1; parent_gene=GRMZM2G700716	1
zma-miR164h-3p	gnl|ZmGDB|AC233936.1_FGT002	3	11.783	1	20	391	410	CAUGUGCCCUUCUUCUCCAU	GUGGAGAGGGAGGGCACAAG	Cleavage	seq=cds; coord=6:96152276..96152824:1; parent_gene=AC233936.1_FG002	1
zma-miR166n-3p	gnl|ZmGDB|GRMZM2G036557_T01	3	16.119	1	20	144	163	UCGGACCAGGCUUCAAUCCC	UGGAUUGGAGCAUGGUCUGA	Translation	seq=cds; coord=1:118952206..118954383:-1; parent_gene=GRMZM2G036557	1
zma-miR166n-3p	gnl|ZmGDB|GRMZM2G160996_T02	3	15.64	1	20	573	592	UCGGACCAGGCUUCAAUCCC	UGGAUUGGAGCAUGGUCUGA	Translation	seq=cds; coord=5:69283153..69286206:1; parent_gene=GRMZM2G160996	1
zma-miR166n-3p	gnl|ZmGDB|GRMZM2G109987_T04	3	24.232	1	20	573	592	UCGGACCAGGCUUCAAUCCC	UGGGAUGAAGCCUGGUCCGG	Cleavage	seq=cds; coord=9:154645740..154650601:-1; parent_gene=GRMZM2G109987	1
zma-miR166n-3p	gnl|ZmGDB|GRMZM2G160996_T01	3	15.64	1	20	897	916	UCGGACCAGGCUUCAAUCCC	UGGAUUGGAGCAUGGUCUGA	Translation	seq=cds; coord=5:69283153..69286206:1; parent_gene=GRMZM2G160996	1
zma-miR166n-3p	gnl|ZmGDB|GRMZM2G042250_T04	3	23.534	1	20	564	583	UCGGACCAGGCUUCAAUCCC	UGGGAUGAAGCCUGGUCCGG	Cleavage	seq=cds; coord=1:2793728..2798869:1; parent_gene=GRMZM2G042250	1
zma-miR166n-3p	gnl|ZmGDB|GRMZM2G469551_T02	3	19.005	1	20	543	562	UCGGACCAGGCUUCAAUCCC	UGGGAUGAAGCCUGGUCCGG	Cleavage	seq=cds; coord=1:230535887..230547084:-1; parent_gene=GRMZM2G469551	1
zma-miR166n-3p	gnl|ZmGDB|GRMZM2G003509_T02	3	21.178	1	20	45	64	UCGGACCAGGCUUCAAUCCC	UGGGAUGAAGCCUGGUCCGG	Cleavage	seq=cds; coord=1:173233523..173239064:-1; parent_gene=GRMZM2G003509	1
zma-miR166n-3p	gnl|ZmGDB|GRMZM2G109987_T01	3	24.232	1	20	573	592	UCGGACCAGGCUUCAAUCCC	UGGGAUGAAGCCUGGUCCGG	Cleavage	seq=cds; coord=9:154642336..154650601:-1; parent_gene=GRMZM2G109987	1
zma-miR166n-3p	gnl|ZmGDB|GRMZM2G109987_T03	3	24.232	1	20	573	592	UCGGACCAGGCUUCAAUCCC	UGGGAUGAAGCCUGGUCCGG	Cleavage	seq=cds; coord=9:154642336..154650601:-1; parent_gene=GRMZM2G109987	1
zma-miR166n-3p	gnl|ZmGDB|GRMZM2G469551_T01	3	19.005	1	20	543	562	UCGGACCAGGCUUCAAUCCC	UGGGAUGAAGCCUGGUCCGG	Cleavage	seq=cds; coord=1:230535106..230547084:-1; parent_gene=GRMZM2G469551	1
zma-miR166n-3p	gnl|ZmGDB|GRMZM2G042250_T01	3	23.534	1	20	564	583	UCGGACCAGGCUUCAAUCCC	UGGGAUGAAGCCUGGUCCGG	Cleavage	seq=cds; coord=1:2793728..2800641:1; parent_gene=GRMZM2G042250	1
zma-miR166n-3p	gnl|ZmGDB|GRMZM2G042250_T02	3	23.534	1	20	564	583	UCGGACCAGGCUUCAAUCCC	UGGGAUGAAGCCUGGUCCGG	Cleavage	seq=cds; coord=1:2793950..2800638:1; parent_gene=GRMZM2G042250	1
zma-miR166n-3p	gnl|ZmGDB|GRMZM2G109987_T05	3	24.232	1	20	573	592	UCGGACCAGGCUUCAAUCCC	UGGGAUGAAGCCUGGUCCGG	Cleavage	seq=cds; coord=9:154642733..154649986:-1; parent_gene=GRMZM2G109987	1
zma-miR166n-3p	gnl|ZmGDB|GRMZM2G109987_T02	3	24.232	1	20	573	592	UCGGACCAGGCUUCAAUCCC	UGGGAUGAAGCCUGGUCCGG	Cleavage	seq=cds; coord=9:154642336..154650601:-1; parent_gene=GRMZM2G109987	1
zma-miR166n-3p	gnl|ZmGDB|GRMZM2G003509_T01	3	21.036	1	20	588	607	UCGGACCAGGCUUCAAUCCC	UGGGAUGAAGCCUGGUCCGG	Cleavage	seq=cds; coord=1:173233037..173239064:-1; parent_gene=GRMZM2G003509	1
zma-miR166n-3p	gnl|ZmGDB|AC187157.4_FGT005	3	23.173	1	20	564	583	UCGGACCAGGCUUCAAUCCC	CGGGAUGAAGCCUGGUCCGG	Cleavage	seq=cds; coord=8:22640866..22645283:-1; parent_gene=AC187157.4_FG005	1
zma-miR166n-3p	gnl|ZmGDB|GRMZM2G042250_T03	3	23.534	1	20	564	583	UCGGACCAGGCUUCAAUCCC	UGGGAUGAAGCCUGGUCCGG	Cleavage	seq=cds; coord=1:2793728..2800614:1; parent_gene=GRMZM2G042250	1
zma-miR166n-3p	gnl|ZmGDB|GRMZM2G178102_T01	3	20.931	1	20	882	901	UCGGACCAGGCUUCAAUCCC	UGGGAUGAAGCCUGGUCCGG	Cleavage	seq=cds; coord=3:123263423..123270240:-1; parent_gene=GRMZM2G178102	1
zma-miR166n-3p	gnl|ZmGDB|AC208827.3_FGT002	3	16.209	1	21	267	287	UCGGACCAGGCUUCAAUCCCU	AAGGAAUGCAGCCUGGUCCGA	Cleavage	seq=cds; coord=10:47167600..47168316:-1; parent_gene=AC208827.3_FG002	1
zma-miR167j-5p	gnl|ZmGDB|GRMZM2G112769_T01	3	17.536	1	21	1006	1027	UGAAGCUGCCAGCA-UGAUCUG	CAGAUUAAUGCUGGCAGUUUCA	Cleavage	seq=cds; coord=1:103774646..103779085:1; parent_gene=GRMZM2G112769	1
zma-miR167j-5p	gnl|ZmGDB|GRMZM2G042623_T02	3	17.536	1	21	994	1015	UGAAGCUGCCAGCA-UGAUCUG	CAGAUUAAUGCUGGCAGUUUCA	Cleavage	seq=cds; coord=8:134370594..134377908:1; parent_gene=GRMZM2G042623	1
zma-miR167j-5p	gnl|ZmGDB|GRMZM2G042623_T01	3	17.536	1	21	1006	1027	UGAAGCUGCCAGCA-UGAUCUG	CAGAUUAAUGCUGGCAGUUUCA	Cleavage	seq=cds; coord=8:134370592..134377931:1; parent_gene=GRMZM2G042623	1
zma-miR167j-5p	gnl|ZmGDB|GRMZM2G363338_T01	3	17.457	1	21	834	854	UGAAGCUGCCAGCAUGAUCUG	CACAUCAUGGUGGCGGCUUUA	Cleavage	seq=cds; coord=8:117799130..117801199:1; parent_gene=GRMZM2G363338	1
zma-miR167j-3p	gnl|ZmGDB|GRMZM5G846548_T02	2.5	20.07	1	20	939	958	GAUCAUGUGGCAGUUUCAUU	AAUUAAACUGCCACAUGAGC	Cleavage	seq=cds; coord=9:146963362..146970186:1; parent_gene=GRMZM5G846548	1
zma-miR167j-3p	gnl|ZmGDB|GRMZM5G846548_T01	2.5	20.07	1	20	939	958	GAUCAUGUGGCAGUUUCAUU	AAUUAAACUGCCACAUGAGC	Cleavage	seq=cds; coord=9:146963362..146970186:1; parent_gene=GRMZM5G846548	1
zma-miR167j-3p	gnl|ZmGDB|AC197266.3_FGT010	3	17.234	1	20	531	550	GAUCAUGUGGCAGUUUCAUU	AAUGGAACUGACACAUGAAC	Translation	seq=cds; coord=6:38267493..38268766:1; parent_gene=AC197266.3_FG010	1
zma-miR169l-5p	gnl|ZmGDB|GRMZM2G078124_T01	1	18.351	1	21	282	302	UAGCCAGGGAUGAUUUGCCUG	CAGGCAAGUCAUCCUUGGCUA	Cleavage	seq=cds; coord=2:192698625..192701211:-1; parent_gene=GRMZM2G078124	1
zma-miR169l-3p	gnl|ZmGDB|GRMZM2G069649_T01	2	24.205	1	20	1416	1435	GGCAAAUCAUCCCUGCUACC	CGUGGUAGGGAUGAUUUGCC	Cleavage	seq=cds; coord=5:115728940..115731973:1; parent_gene=GRMZM2G069649	1
zma-miR169l-3p	gnl|ZmGDB|GRMZM2G095695_T02	2.5	12.666	1	20	406	425	GGCAAAUCAUCCCUGCUACC	AGUUGCAGGGAUGGUUUGCC	Cleavage	seq=cds; coord=2:218079025..218113240:-1; parent_gene=GRMZM2G095695	1
zma-miR169m-5p	gnl|ZmGDB|GRMZM2G078124_T01	1.5	18.351	1	20	283	302	UAGCCAAGAAUGGCUUGCCU	AGGCAAGUCAUCCUUGGCUA	Translation	seq=cds; coord=2:192698625..192701211:-1; parent_gene=GRMZM2G078124	1
zma-miR169m-5p	gnl|ZmGDB|GRMZM2G000236_T01	3	20.76	1	20	963	982	UAGCCAAGAAUGGCUUGCCU	UGGGAAGCUGUUCUUGGCUA	Cleavage	seq=cds; coord=9:7308153..7309906:1; parent_gene=GRMZM2G000236	1
zma-miR169m-5p	gnl|ZmGDB|GRMZM2G427031_T03	3	17.055	1	20	807	826	UAGCCAAGAAUGGCUUGCCU	UGGCAAGCCACUGUUGGCUA	Translation	seq=cds; coord=10:144724838..144728122:1; parent_gene=GRMZM2G427031	1
zma-miR169m-5p	gnl|ZmGDB|GRMZM2G427031_T01	3	17.055	1	20	2091	2110	UAGCCAAGAAUGGCUUGCCU	UGGCAAGCCACUGUUGGCUA	Translation	seq=cds; coord=10:144716135..144739736:1; parent_gene=GRMZM2G427031	1
zma-miR169m-3p	gnl|ZmGDB|GRMZM2G175205_T01	2.5	21.885	1	20	76	95	GGCAUCCAUUCUUGGCUAAG	CUUGGGCAGGAAUGGAUGCU	Cleavage	seq=cds; coord=2:195760883..195762256:1; parent_gene=GRMZM2G175205	1
zma-miR169m-3p	gnl|ZmGDB|AC209950.3_FGT009	3	20.592	1	20	148	167	GGCAUCCAUUCUUGGCUAAG	CUUGGACACGAAUGGAUGCU	Cleavage	seq=cds; coord=3:175939225..175939901:-1; parent_gene=AC209950.3_FG009	1
zma-miR169n-5p	gnl|ZmGDB|GRMZM2G078124_T01	1.5	18.351	1	20	283	302	UAGCCAAGAAUGGCUUGCCU	AGGCAAGUCAUCCUUGGCUA	Translation	seq=cds; coord=2:192698625..192701211:-1; parent_gene=GRMZM2G078124	1
zma-miR169n-5p	gnl|ZmGDB|GRMZM2G000236_T01	3	20.76	1	20	963	982	UAGCCAAGAAUGGCUUGCCU	UGGGAAGCUGUUCUUGGCUA	Cleavage	seq=cds; coord=9:7308153..7309906:1; parent_gene=GRMZM2G000236	1
zma-miR169n-5p	gnl|ZmGDB|GRMZM2G427031_T03	3	17.055	1	20	807	826	UAGCCAAGAAUGGCUUGCCU	UGGCAAGCCACUGUUGGCUA	Translation	seq=cds; coord=10:144724838..144728122:1; parent_gene=GRMZM2G427031	1
zma-miR169n-5p	gnl|ZmGDB|GRMZM2G427031_T01	3	17.055	1	20	2091	2110	UAGCCAAGAAUGGCUUGCCU	UGGCAAGCCACUGUUGGCUA	Translation	seq=cds; coord=10:144716135..144739736:1; parent_gene=GRMZM2G427031	1
zma-miR169n-3p	gnl|ZmGDB|GRMZM2G090045_T01	3	23.023	1	20	36	55	GGCAGGCCUUCUUGGCUAAG	UUUAGCCAGGGAGGCUUGUU	Cleavage	seq=cds; coord=2:173423107..173423873:1; parent_gene=GRMZM2G090045	1
zma-miR169n-3p	gnl|ZmGDB|GRMZM5G833574_T01	3	13.492	1	20	161	180	GGCAGGCCUUCUUGGCUAAG	CUUGGUCCAGAAGGUUUGCC	Cleavage	seq=cds; coord=4:25646978..25647343:-1; parent_gene=GRMZM5G833574	1
zma-miR169n-3p	gnl|ZmGDB|GRMZM5G836622_T01	3	15.864	1	20	161	180	GGCAGGCCUUCUUGGCUAAG	CUUGGUCCAGAAGGUUUGCC	Cleavage	seq=cds; coord=5:207279017..207279388:-1; parent_gene=GRMZM5G836622	1
zma-miR169n-3p	gnl|ZmGDB|GRMZM5G823908_T01	3	13.896	1	20	161	180	GGCAGGCCUUCUUGGCUAAG	CUUGGUCCAGAAGGUUUGCC	Cleavage	seq=cds; coord=8:6762412..6762783:1; parent_gene=GRMZM5G823908	1
zma-miR169n-3p	gnl|ZmGDB|GRMZM2G101302_T01	3	13.896	1	20	161	180	GGCAGGCCUUCUUGGCUAAG	CUUGGUCCAGAAGGUUUGCC	Cleavage	seq=cds; coord=6:78661737..78662433:-1; parent_gene=GRMZM2G101302	1
zma-miR169n-3p	gnl|ZmGDB|GRMZM2G437161_T01	3	15.864	1	20	161	180	GGCAGGCCUUCUUGGCUAAG	CUUGGUCCAGAAGGUUUGCC	Cleavage	seq=cds; coord=5:207186276..207187544:-1; parent_gene=GRMZM2G437161	1
zma-miR169n-3p	gnl|ZmGDB|GRMZM2G165224_T01	3	13.443	1	20	602	621	GGCAGGCCUUCUUGGCUAAG	CUUGGUCCAGAAGGUUUGCC	Cleavage	seq=cds; coord=4:25650462..25653634:1; parent_gene=GRMZM2G165224	1
zma-miR169o-5p	gnl|ZmGDB|GRMZM2G078124_T01	1	18.351	1	20	283	302	UAGCCAAGAAUGACUUGCCU	AGGCAAGUCAUCCUUGGCUA	Translation	seq=cds; coord=2:192698625..192701211:-1; parent_gene=GRMZM2G078124	1
zma-miR169o-5p	gnl|ZmGDB|GRMZM2G547542_T01	3	20.313	1	20	862	881	UAGCCAAGAAUGACUUGCCU	AGGCAAUUCAUUCUUGGUGA	Cleavage	seq=cds; coord=10:106952335..106983266:-1; parent_gene=GRMZM2G547542	1
zma-miR169o-3p	gnl|ZmGDB|GRMZM2G015730_T03	2.5	13.265	1	20	679	698	GGCAGGUCUUCUUGGCUAGC	UCUAGCCAAGAAGACAUGCC	Cleavage	seq=cds; coord=9:138142902..138149052:-1; parent_gene=GRMZM2G015730	1
zma-miR169o-3p	gnl|ZmGDB|GRMZM2G015730_T02	2.5	13.265	1	20	1204	1223	GGCAGGUCUUCUUGGCUAGC	UCUAGCCAAGAAGACAUGCC	Cleavage	seq=cds; coord=9:138142902..138149052:-1; parent_gene=GRMZM2G015730	1
zma-miR169o-3p	gnl|ZmGDB|GRMZM2G015730_T01	2.5	13.265	1	20	1228	1247	GGCAGGUCUUCUUGGCUAGC	UCUAGCCAAGAAGACAUGCC	Cleavage	seq=cds; coord=9:138142902..138149052:-1; parent_gene=GRMZM2G015730	1
zma-miR169p-5p	gnl|ZmGDB|GRMZM2G078124_T01	1	18.351	1	21	282	302	UAGCCAAGGAUGACUUGCCGG	CAGGCAAGUCAUCCUUGGCUA	Cleavage	seq=cds; coord=2:192698625..192701211:-1; parent_gene=GRMZM2G078124	1
zma-miR169p-5p	gnl|ZmGDB|GRMZM2G154059_T01	3	16.467	1	20	1686	1705	UAGCCAAGGAUGACUUGCCG	UGGAAAGACAUCUUUGGCUA	Cleavage	seq=cds; coord=4:239219198..239221174:-1; parent_gene=GRMZM2G154059	1
zma-miR169p-3p	gnl|ZmGDB|GRMZM2G467154_T01	3	13.377	1	21	57	77	GGCAAGUCAUCUGGGGCUACG	UGUCACUCCAGAUGACUUGCU	Cleavage	seq=cds; coord=3:229581422..229582061:-1; parent_gene=GRMZM2G467154	1
zma-miR169p-3p	gnl|ZmGDB|GRMZM2G131733_T01	3	23.906	1	21	1659	1679	GGCAAGUCAUCUGGGGCUACG	UGAAGCACCGGAUGAUUUGCC	Cleavage	seq=cds; coord=6:149821236..149823638:1; parent_gene=GRMZM2G131733	1
zma-miR169q-5p	gnl|ZmGDB|GRMZM2G078124_T01	1.5	18.351	1	20	283	302	UAGCCAAGAAUGGCUUGCCU	AGGCAAGUCAUCCUUGGCUA	Translation	seq=cds; coord=2:192698625..192701211:-1; parent_gene=GRMZM2G078124	1
zma-miR169q-5p	gnl|ZmGDB|GRMZM2G000236_T01	3	20.76	1	20	963	982	UAGCCAAGAAUGGCUUGCCU	UGGGAAGCUGUUCUUGGCUA	Cleavage	seq=cds; coord=9:7308153..7309906:1; parent_gene=GRMZM2G000236	1
zma-miR169q-5p	gnl|ZmGDB|GRMZM2G427031_T03	3	17.055	1	20	807	826	UAGCCAAGAAUGGCUUGCCU	UGGCAAGCCACUGUUGGCUA	Translation	seq=cds; coord=10:144724838..144728122:1; parent_gene=GRMZM2G427031	1
zma-miR169q-5p	gnl|ZmGDB|GRMZM2G427031_T01	3	17.055	1	20	2091	2110	UAGCCAAGAAUGGCUUGCCU	UGGCAAGCCACUGUUGGCUA	Translation	seq=cds; coord=10:144716135..144739736:1; parent_gene=GRMZM2G427031	1
zma-miR169r-5p	gnl|ZmGDB|GRMZM2G078124_T01	2	18.351	1	21	282	302	CAGCCAAGGAUGACUUGCCGG	CAGGCAAGUCAUCCUUGGCUA	Cleavage	seq=cds; coord=2:192698625..192701211:-1; parent_gene=GRMZM2G078124	1
zma-miR169r-5p	gnl|ZmGDB|GRMZM5G848857_T01	3	18.83	1	20	154	173	CAGCCAAGGAUGACUUGCCG	CAGCAAGUCAUCCUUUGUUG	Cleavage	seq=cds; coord=3:70673394..70675245:-1; parent_gene=GRMZM5G848857	1
zma-miR169r-3p	gnl|ZmGDB|GRMZM2G011140_T01	2	22.276	1	21	206	226	GGCAAGUUGUCCUUGGCUACA	UGCAGCCAAGGAUGACUUGCC	Cleavage	seq=cds; coord=2:11299777..11300750:1; parent_gene=GRMZM2G011140	1
zma-miR169r-3p	gnl|ZmGDB|GRMZM2G011140_T02	2	22.276	1	21	206	226	GGCAAGUUGUCCUUGGCUACA	UGCAGCCAAGGAUGACUUGCC	Cleavage	seq=cds; coord=2:11299777..11300748:1; parent_gene=GRMZM2G011140	1
zma-miR171l-5p	gnl|ZmGDB|GRMZM2G325350_T01	3	16.876	1	20	1155	1174	UAUUGGCGUGCCUCAAUCCG	UGUAUUGAGGUAUGCCAAUG	Cleavage	seq=cds; coord=8:107494787..107496337:-1; parent_gene=GRMZM2G325350	1
zma-miR171l-3p	gnl|ZmGDB|GRMZM2G317338_T01	1.5	23.512	1	21	252	272	GGAUUGAGCCGCGUCAAUAUC	GAUAUUGGCGCGGCUCAAUCA	Cleavage	seq=cds; coord=6:2909967..2910502:1; parent_gene=GRMZM2G317338	1
zma-miR171l-3p	gnl|ZmGDB|GRMZM2G098800_T01	1.5	23.516	1	21	420	440	GGAUUGAGCCGCGUCAAUAUC	GAUAUUGGCGCGGCUCAAUCA	Cleavage	seq=cds; coord=4:153196436..153199541:1; parent_gene=GRMZM2G098800	1
zma-miR171l-3p	gnl|ZmGDB|GRMZM2G098800_T02	1.5	23.516	1	21	1107	1127	GGAUUGAGCCGCGUCAAUAUC	GAUAUUGGCGCGGCUCAAUCA	Cleavage	seq=cds; coord=4:153196404..153199186:1; parent_gene=GRMZM2G098800	1
zma-miR171l-3p	gnl|ZmGDB|AC187788.3_FGT008	2	22.707	1	21	144	164	GGAUUGAGCCGCGUCAAUAUC	GAUAUUGGCGCGGCUCAAUUA	Cleavage	seq=cds; coord=7:165554811..165555298:-1; parent_gene=AC187788.3_FG008	1
zma-miR171l-3p	gnl|ZmGDB|GRMZM2G477666_T01	3	20.615	1	21	219	239	GGAUUGAGCCGCGUCAAUAUC	GAUAUUGGCGCAGCUCAAUUA	Translation	seq=cds; coord=9:143369964..143371910:-1; parent_gene=GRMZM2G477666	1
zma-miR171l-3p	gnl|ZmGDB|GRMZM2G086777_T01	3	23.202	1	21	123	143	GGAUUGAGCCGCGUCAAUAUC	GAUGUUGAAGCGGCUUGGUCC	Cleavage	seq=cds; coord=6:84301610..84302180:1; parent_gene=GRMZM2G086777	1
zma-miR171l-3p	gnl|ZmGDB|GRMZM2G039532_T01	3	22.3	1	21	123	143	GGAUUGAGCCGCGUCAAUAUC	GAUGUUGAAGCGGCUUGGUCC	Cleavage	seq=cds; coord=2:4168046..4170467:-1; parent_gene=GRMZM2G039532	1
zma-miR171m-5p	gnl|ZmGDB|GRMZM2G071502_T01	3	18.521	1	20	43	62	UAUUGGCGCGCCUCAAUCCG	UGGAUUGAUUCGCGUCAAUA	Translation	seq=cds; coord=5:148896609..148896908:-1; parent_gene=GRMZM2G071502	1
zma-miR171m-5p	gnl|ZmGDB|GRMZM2G092182_T04	3	20.539	1	20	101	120	UAUUGGCGCGCCUCAAUCCG	CGGAUUGCCGCGUGCUAAUA	Cleavage	seq=cds; coord=4:163095040..163099767:-1; parent_gene=GRMZM2G092182	1
zma-miR171m-5p	gnl|ZmGDB|GRMZM2G092182_T03	3	20.539	1	20	515	534	UAUUGGCGCGCCUCAAUCCG	CGGAUUGCCGCGUGCUAAUA	Cleavage	seq=cds; coord=4:163095040..163099818:-1; parent_gene=GRMZM2G092182	1
zma-miR171m-3p	gnl|ZmGDB|GRMZM2G317338_T01	1.5	23.512	1	21	252	272	GGAUUGAGCCGCGUCAAUAUC	GAUAUUGGCGCGGCUCAAUCA	Cleavage	seq=cds; coord=6:2909967..2910502:1; parent_gene=GRMZM2G317338	1
zma-miR171m-3p	gnl|ZmGDB|GRMZM2G098800_T01	1.5	23.516	1	21	420	440	GGAUUGAGCCGCGUCAAUAUC	GAUAUUGGCGCGGCUCAAUCA	Cleavage	seq=cds; coord=4:153196436..153199541:1; parent_gene=GRMZM2G098800	1
zma-miR171m-3p	gnl|ZmGDB|GRMZM2G098800_T02	1.5	23.516	1	21	1107	1127	GGAUUGAGCCGCGUCAAUAUC	GAUAUUGGCGCGGCUCAAUCA	Cleavage	seq=cds; coord=4:153196404..153199186:1; parent_gene=GRMZM2G098800	1
zma-miR171m-3p	gnl|ZmGDB|AC187788.3_FGT008	2	22.707	1	21	144	164	GGAUUGAGCCGCGUCAAUAUC	GAUAUUGGCGCGGCUCAAUUA	Cleavage	seq=cds; coord=7:165554811..165555298:-1; parent_gene=AC187788.3_FG008	1
zma-miR171m-3p	gnl|ZmGDB|GRMZM2G477666_T01	3	20.615	1	21	219	239	GGAUUGAGCCGCGUCAAUAUC	GAUAUUGGCGCAGCUCAAUUA	Translation	seq=cds; coord=9:143369964..143371910:-1; parent_gene=GRMZM2G477666	1
zma-miR171m-3p	gnl|ZmGDB|GRMZM2G086777_T01	3	23.202	1	21	123	143	GGAUUGAGCCGCGUCAAUAUC	GAUGUUGAAGCGGCUUGGUCC	Cleavage	seq=cds; coord=6:84301610..84302180:1; parent_gene=GRMZM2G086777	1
zma-miR171m-3p	gnl|ZmGDB|GRMZM2G039532_T01	3	22.3	1	21	123	143	GGAUUGAGCCGCGUCAAUAUC	GAUGUUGAAGCGGCUUGGUCC	Cleavage	seq=cds; coord=2:4168046..4170467:-1; parent_gene=GRMZM2G039532	1
zma-miR171n-5p	gnl|ZmGDB|GRMZM2G160279_T01	3	17.431	1	21	242	262	UAUUGGUGAGGUUCAAUCCGA	UGGGAUUGAGCCUCACUGGUA	Cleavage	seq=cds; coord=10:13337256..13341548:1; parent_gene=GRMZM2G160279	1
zma-miR171n-5p	gnl|ZmGDB|AC207628.4_FGT005	3	16.402	1	20	477	496	UAUUGGUGAGGUUCAAUCCG	UGGGUUGAGUUUCACCAAUG	Cleavage	seq=cds; coord=3:202940271..202942726:1; parent_gene=AC207628.4_FG005	1
zma-miR171n-5p	gnl|ZmGDB|GRMZM2G504398_T01	3	17.907	1	20	81	100	UAUUGGUGAGGUUCAAUCCG	UGGAUUUAACUUCGCCAGUA	Cleavage	seq=cds; coord=2:186698211..186698592:-1; parent_gene=GRMZM2G504398	1
zma-miR171n-3p	gnl|ZmGDB|GRMZM2G317338_T01	0	23.512	1	21	252	272	UGAUUGAGCCGCGCCAAUAUC	GAUAUUGGCGCGGCUCAAUCA	Cleavage	seq=cds; coord=6:2909967..2910502:1; parent_gene=GRMZM2G317338	1
zma-miR171n-3p	gnl|ZmGDB|GRMZM2G098800_T01	0	23.516	1	21	420	440	UGAUUGAGCCGCGCCAAUAUC	GAUAUUGGCGCGGCUCAAUCA	Cleavage	seq=cds; coord=4:153196436..153199541:1; parent_gene=GRMZM2G098800	1
zma-miR171n-3p	gnl|ZmGDB|GRMZM2G098800_T02	0	23.516	1	21	1107	1127	UGAUUGAGCCGCGCCAAUAUC	GAUAUUGGCGCGGCUCAAUCA	Cleavage	seq=cds; coord=4:153196404..153199186:1; parent_gene=GRMZM2G098800	1
zma-miR171n-3p	gnl|ZmGDB|AC187788.3_FGT008	0.5	22.707	1	21	144	164	UGAUUGAGCCGCGCCAAUAUC	GAUAUUGGCGCGGCUCAAUUA	Cleavage	seq=cds; coord=7:165554811..165555298:-1; parent_gene=AC187788.3_FG008	1
zma-miR171n-3p	gnl|ZmGDB|GRMZM2G477666_T01	1.5	20.615	1	21	219	239	UGAUUGAGCCGCGCCAAUAUC	GAUAUUGGCGCAGCUCAAUUA	Translation	seq=cds; coord=9:143369964..143371910:-1; parent_gene=GRMZM2G477666	1
zma-miR171n-3p	gnl|ZmGDB|GRMZM2G060265_T01	3	23.598	1	21	438	458	UGAUUGAGCCGCGCCAAUAUC	GAUACUGGCGCGGCUCAACUA	Cleavage	seq=cds; coord=1:1955584..1957660:1; parent_gene=GRMZM2G060265	1
zma-miR171n-3p	gnl|ZmGDB|GRMZM2G082167_T01	3	24.151	1	20	719	738	UGAUUGAGCCGCGCCAAUAU	CUGUUGGUGCUGCUCAAUCA	Translation	seq=cds; coord=10:26984538..26988303:1; parent_gene=GRMZM2G082167	1
zma-miR390a-5p	gnl|ZmGDB|GRMZM2G304745_T01	1	21.54	1	21	148	168	AAGCUCAGGAGGGAUAGCGCC	GGCACUAUCCCUCCUGAGCUU	Cleavage	seq=cds; coord=2:22952029..22955835:-1; parent_gene=GRMZM2G304745	1
zma-miR390a-5p	gnl|ZmGDB|GRMZM2G330298_T01	3	19.848	1	21	1630	1650	AAGCUCAGGAGGGAUAGCGCC	GGUGUUGUUCUUCUUGAGCUU	Cleavage	seq=cds; coord=3:204093932..204098418:1; parent_gene=GRMZM2G330298	1
zma-miR390a-5p	gnl|ZmGDB|AC218033.2_FGT001	3	22.109	1	21	3	23	AAGCUCAGGAGGGAUAGCGCC	GGCGUCCUCCUUCCUGAGCUU	Cleavage	seq=cds; coord=3:72367598..72367780:1; parent_gene=AC218033.2_FG001	1
zma-miR390a-5p	gnl|ZmGDB|AC218169.3_FGT003	3	20.717	1	20	332	351	AAGCUCAGGAGGGAUAGCGC	ACGUUUUCUCUCCUGAGCUU	Cleavage	seq=cds; coord=3:5810977..5811847:1; parent_gene=AC218169.3_FG003	1
zma-miR390a-5p	gnl|ZmGDB|AC205735.3_FGT006	3	21.231	1	20	1295	1314	AAGCUCAGGAGGGAUAGCGC	GCGCUGUCAUUUCUGGGCUU	Cleavage	seq=cds; coord=4:205308125..205309513:-1; parent_gene=AC205735.3_FG006	1
zma-miR393b-5p	gnl|ZmGDB|GRMZM2G135978_T01	2	18.848	1	20	1551	1570	UCCAAAGGGAUCGCAUUGAU	GACAAUGCGAUCCCUUUGGA	Cleavage	seq=cds; coord=8:127112957..127118492:-1; parent_gene=GRMZM2G135978	1
zma-miR393b-5p	gnl|ZmGDB|GRMZM2G137451_T02	2	19.041	1	20	1500	1519	UCCAAAGGGAUCGCAUUGAU	CACAAUGCGAUCCCUUUGGA	Cleavage	seq=cds; coord=10:110996827..111000916:-1; parent_gene=GRMZM2G137451	1
zma-miR393b-5p	gnl|ZmGDB|GRMZM2G137451_T01	2	19.041	1	20	1500	1519	UCCAAAGGGAUCGCAUUGAU	CACAAUGCGAUCCCUUUGGA	Cleavage	seq=cds; coord=10:110996613..111000922:-1; parent_gene=GRMZM2G137451	1
zma-miR393b-5p	gnl|ZmGDB|GRMZM2G036832_T01	3	17.479	1	20	887	906	UCCAAAGGGAUCGCAUUGAU	AUCAGAGAGAUUCCUUUGGA	Cleavage	seq=cds; coord=2:182619406..182625522:-1; parent_gene=GRMZM2G036832	1
zma-miR393b-5p	gnl|ZmGDB|GRMZM2G036832_T02	3	17.479	1	20	887	906	UCCAAAGGGAUCGCAUUGAU	AUCAGAGAGAUUCCUUUGGA	Cleavage	seq=cds; coord=2:182619819..182625522:-1; parent_gene=GRMZM2G036832	1
zma-miR393c-5p	gnl|ZmGDB|GRMZM2G135978_T01	2	18.848	1	20	1551	1570	UCCAAAGGGAUCGCAUUGAU	GACAAUGCGAUCCCUUUGGA	Cleavage	seq=cds; coord=8:127112957..127118492:-1; parent_gene=GRMZM2G135978	1
zma-miR393c-5p	gnl|ZmGDB|GRMZM2G137451_T02	2	19.041	1	20	1500	1519	UCCAAAGGGAUCGCAUUGAU	CACAAUGCGAUCCCUUUGGA	Cleavage	seq=cds; coord=10:110996827..111000916:-1; parent_gene=GRMZM2G137451	1
zma-miR393c-5p	gnl|ZmGDB|GRMZM2G137451_T01	2	19.041	1	20	1500	1519	UCCAAAGGGAUCGCAUUGAU	CACAAUGCGAUCCCUUUGGA	Cleavage	seq=cds; coord=10:110996613..111000922:-1; parent_gene=GRMZM2G137451	1
zma-miR393c-5p	gnl|ZmGDB|GRMZM2G036832_T01	3	17.479	1	22	885	906	UCCAAAGGGAUCGCAUUGAUCU	AUAUCAGAGAGAUUCCUUUGGA	Cleavage	seq=cds; coord=2:182619406..182625522:-1; parent_gene=GRMZM2G036832	1
zma-miR393c-5p	gnl|ZmGDB|GRMZM2G036832_T02	3	17.479	1	22	885	906	UCCAAAGGGAUCGCAUUGAUCU	AUAUCAGAGAGAUUCCUUUGGA	Cleavage	seq=cds; coord=2:182619819..182625522:-1; parent_gene=GRMZM2G036832	1
zma-miR393c-3p	gnl|ZmGDB|GRMZM2G306193_T01	2.5	20.52	1	20	1081	1100	GUCAGUGCAAUCCCUUUGGA	UCCAAAGGGUUUGUGCUGGC	Translation	seq=cds; coord=3:106123061..106131455:-1; parent_gene=GRMZM2G306193	1
zma-miR393c-3p	gnl|ZmGDB|GRMZM2G156756_T01	3	16.658	1	22	2345	2366	GUCAGUGCAAUCCCUUUGGAAU	ACUCCAAGGGGACUGCACAGAC	Translation	seq=cds; coord=1:295421788..295428738:1; parent_gene=GRMZM2G156756	1
zma-miR393c-3p	gnl|ZmGDB|GRMZM2G417746_T01	3	19.853	1	20	433	452	GUCAGUGCAAUCCCUUUGGA	UCCAAAGGGUUUGUGCUGGU	Translation	seq=cds; coord=1:126945132..126947322:-1; parent_gene=GRMZM2G417746	1
zma-miR393c-3p	gnl|ZmGDB|GRMZM2G003640_T07	3	22.327	1	22	50	71	GUCAGUGCAAUCCCUUUGGAAU	AGUCCCGAGGGAUAGCACUGAU	Translation	seq=cds; coord=1:256296778..256306481:-1; parent_gene=GRMZM2G003640	1
zma-miR393c-3p	gnl|ZmGDB|GRMZM2G003640_T06	3	22.327	1	22	50	71	GUCAGUGCAAUCCCUUUGGAAU	AGUCCCGAGGGAUAGCACUGAU	Translation	seq=cds; coord=1:256296778..256306481:-1; parent_gene=GRMZM2G003640	1
zma-miR393c-3p	gnl|ZmGDB|GRMZM2G003640_T05	3	22.327	1	22	50	71	GUCAGUGCAAUCCCUUUGGAAU	AGUCCCGAGGGAUAGCACUGAU	Translation	seq=cds; coord=1:256296778..256306481:-1; parent_gene=GRMZM2G003640	1
zma-miR393c-3p	gnl|ZmGDB|GRMZM2G003640_T04	3	22.327	1	22	50	71	GUCAGUGCAAUCCCUUUGGAAU	AGUCCCGAGGGAUAGCACUGAU	Translation	seq=cds; coord=1:256296778..256306481:-1; parent_gene=GRMZM2G003640	1
zma-miR393c-3p	gnl|ZmGDB|GRMZM2G003640_T02	3	22.327	1	22	50	71	GUCAGUGCAAUCCCUUUGGAAU	AGUCCCGAGGGAUAGCACUGAU	Translation	seq=cds; coord=1:256296778..256306481:-1; parent_gene=GRMZM2G003640	1
zma-miR393c-3p	gnl|ZmGDB|GRMZM2G003640_T01	3	22.327	1	22	50	71	GUCAGUGCAAUCCCUUUGGAAU	AGUCCCGAGGGAUAGCACUGAU	Translation	seq=cds; coord=1:256296778..256306481:-1; parent_gene=GRMZM2G003640	1
zma-miR393c-3p	gnl|ZmGDB|GRMZM2G003640_T03	3	22.327	1	22	50	71	GUCAGUGCAAUCCCUUUGGAAU	AGUCCCGAGGGAUAGCACUGAU	Translation	seq=cds; coord=1:256296778..256306481:-1; parent_gene=GRMZM2G003640	1
zma-miR395d-5p	gnl|ZmGDB|GRMZM2G368678_T01	2.5	18.525	1	21	339	359	GUUCUAUGCAAGCACUUCACG	UGUGGAGUGCUUACAUGGAAU	Translation	seq=cds; coord=6:119676436..119695343:-1; parent_gene=GRMZM2G368678	1
zma-miR395d-5p	gnl|ZmGDB|GRMZM2G029356_T01	2.5	19.2	1	20	369	388	GUUCUAUGCAAGCACUUCAC	GUCAAGUUCUUGCGUAGAAC	Cleavage	seq=cds; coord=2:41009883..41019487:-1; parent_gene=GRMZM2G029356	1
zma-miR395d-5p	gnl|ZmGDB|GRMZM2G029356_T02	2.5	19.2	1	20	414	433	GUUCUAUGCAAGCACUUCAC	GUCAAGUUCUUGCGUAGAAC	Cleavage	seq=cds; coord=2:41010304..41019487:-1; parent_gene=GRMZM2G029356	1
zma-miR395d-3p	gnl|ZmGDB|GRMZM2G149952_T01	1	21.484	1	21	391	411	GUGAAGUGUUUGGGGGAACUC	GAGUUCCUCCAAACACUUCAU	Cleavage	seq=cds; coord=1:275090703..275094517:-1; parent_gene=GRMZM2G149952	1
zma-miR395d-3p	gnl|ZmGDB|GRMZM2G051270_T01	1.5	22.338	1	21	397	417	GUGAAGUGUUUGGGGGAACUC	GAGUUCCUCCAAGCACUUCAU	Cleavage	seq=cds; coord=5:7702248..7706223:1; parent_gene=GRMZM2G051270	1
zma-miR395d-3p	gnl|ZmGDB|GRMZM2G051270_T03	1.5	22.338	1	21	397	417	GUGAAGUGUUUGGGGGAACUC	GAGUUCCUCCAAGCACUUCAU	Cleavage	seq=cds; coord=5:7702336..7706201:1; parent_gene=GRMZM2G051270	1
zma-miR395d-3p	gnl|ZmGDB|GRMZM2G051270_T02	1.5	19.86	1	21	13	33	GUGAAGUGUUUGGGGGAACUC	GAGUUCCUCCAAGCACUUCAU	Cleavage	seq=cds; coord=5:7702370..7706207:1; parent_gene=GRMZM2G051270	1
zma-miR395d-3p	gnl|ZmGDB|GRMZM2G134044_T01	3	21.943	1	20	606	625	GUGAAGUGUUUGGGGGAACU	GGUUUCCCCAAAUGCUUCGU	Cleavage	seq=cds; coord=10:102234290..102238464:-1; parent_gene=GRMZM2G134044	1
zma-miR395d-3p	gnl|ZmGDB|GRMZM2G134044_T02	3	21.943	1	20	606	625	GUGAAGUGUUUGGGGGAACU	GGUUUCCCCAAAUGCUUCGU	Cleavage	seq=cds; coord=10:102234290..102238464:-1; parent_gene=GRMZM2G134044	1
zma-miR395d-3p	gnl|ZmGDB|GRMZM2G134044_T03	3	21.943	1	20	606	625	GUGAAGUGUUUGGGGGAACU	GGUUUCCCCAAAUGCUUCGU	Cleavage	seq=cds; coord=10:102234290..102238413:-1; parent_gene=GRMZM2G134044	1
zma-miR395e-5p	gnl|ZmGDB|GRMZM2G420988_T01	1.5	14.876	1	20	245	264	GUUCCCUUCAAGCACUUCAC	GUGAAGUGUUUGGAGGGAAU	Cleavage	seq=cds; coord=9:43679893..43682735:-1; parent_gene=GRMZM2G420988	1
zma-miR395e-5p	gnl|ZmGDB|GRMZM2G043238_T03	2.5	17.01	1	20	1151	1170	GUUCCCUUCAAGCACUUCAC	GUGAAGAGCUUGAGGGGAAG	Cleavage	seq=cds; coord=8:48111105..48115366:1; parent_gene=GRMZM2G043238	1
zma-miR395e-5p	gnl|ZmGDB|GRMZM2G043238_T02	2.5	17.01	1	20	1445	1464	GUUCCCUUCAAGCACUUCAC	GUGAAGAGCUUGAGGGGAAG	Cleavage	seq=cds; coord=8:48088346..48116467:1; parent_gene=GRMZM2G043238	1
zma-miR395e-5p	gnl|ZmGDB|GRMZM2G043238_T01	2.5	17.01	1	20	1151	1170	GUUCCCUUCAAGCACUUCAC	GUGAAGAGCUUGAGGGGAAG	Cleavage	seq=cds; coord=8:48111105..48135622:1; parent_gene=GRMZM2G043238	1
zma-miR395e-5p	gnl|ZmGDB|GRMZM2G059381_T03	3	18.583	1	20	149	168	GUUCCCUUCAAGCACUUCAC	GUGAAGUUCUUGAAGGGUAU	Cleavage	seq=cds; coord=4:187594531..187598231:-1; parent_gene=GRMZM2G059381	1
zma-miR395e-5p	gnl|ZmGDB|GRMZM2G059381_T01	3	18.583	1	20	1313	1332	GUUCCCUUCAAGCACUUCAC	GUGAAGUUCUUGAAGGGUAU	Cleavage	seq=cds; coord=4:187594517..187604906:-1; parent_gene=GRMZM2G059381	1
zma-miR395e-3p	gnl|ZmGDB|GRMZM2G149952_T01	1	21.484	1	21	391	411	GUGAAGUGUUUGGGGGAACUC	GAGUUCCUCCAAACACUUCAU	Cleavage	seq=cds; coord=1:275090703..275094517:-1; parent_gene=GRMZM2G149952	1
zma-miR395e-3p	gnl|ZmGDB|GRMZM2G051270_T01	1.5	22.338	1	21	397	417	GUGAAGUGUUUGGGGGAACUC	GAGUUCCUCCAAGCACUUCAU	Cleavage	seq=cds; coord=5:7702248..7706223:1; parent_gene=GRMZM2G051270	1
zma-miR395e-3p	gnl|ZmGDB|GRMZM2G051270_T03	1.5	22.338	1	21	397	417	GUGAAGUGUUUGGGGGAACUC	GAGUUCCUCCAAGCACUUCAU	Cleavage	seq=cds; coord=5:7702336..7706201:1; parent_gene=GRMZM2G051270	1
zma-miR395e-3p	gnl|ZmGDB|GRMZM2G051270_T02	1.5	19.86	1	21	13	33	GUGAAGUGUUUGGGGGAACUC	GAGUUCCUCCAAGCACUUCAU	Cleavage	seq=cds; coord=5:7702370..7706207:1; parent_gene=GRMZM2G051270	1
zma-miR395e-3p	gnl|ZmGDB|GRMZM2G134044_T01	3	21.943	1	20	606	625	GUGAAGUGUUUGGGGGAACU	GGUUUCCCCAAAUGCUUCGU	Cleavage	seq=cds; coord=10:102234290..102238464:-1; parent_gene=GRMZM2G134044	1
zma-miR395e-3p	gnl|ZmGDB|GRMZM2G134044_T02	3	21.943	1	20	606	625	GUGAAGUGUUUGGGGGAACU	GGUUUCCCCAAAUGCUUCGU	Cleavage	seq=cds; coord=10:102234290..102238464:-1; parent_gene=GRMZM2G134044	1
zma-miR395e-3p	gnl|ZmGDB|GRMZM2G134044_T03	3	21.943	1	20	606	625	GUGAAGUGUUUGGGGGAACU	GGUUUCCCCAAAUGCUUCGU	Cleavage	seq=cds; coord=10:102234290..102238413:-1; parent_gene=GRMZM2G134044	1
zma-miR395f-5p	gnl|ZmGDB|AC187656.2_FGT003	3	22.503	1	21	106	126	GUUACCUACAAGCACGUCUCG	UGUGAUGUGCUUGUAGCUAAC	Cleavage	seq=cds; coord=2:42691596..42692342:-1; parent_gene=AC187656.2_FG003	1
zma-miR395f-3p	gnl|ZmGDB|GRMZM2G149952_T01	1	21.484	1	21	391	411	GUGAAGUGUUUGGGGGAACUC	GAGUUCCUCCAAACACUUCAU	Cleavage	seq=cds; coord=1:275090703..275094517:-1; parent_gene=GRMZM2G149952	1
zma-miR395f-3p	gnl|ZmGDB|GRMZM2G051270_T01	1.5	22.338	1	21	397	417	GUGAAGUGUUUGGGGGAACUC	GAGUUCCUCCAAGCACUUCAU	Cleavage	seq=cds; coord=5:7702248..7706223:1; parent_gene=GRMZM2G051270	1
zma-miR395f-3p	gnl|ZmGDB|GRMZM2G051270_T03	1.5	22.338	1	21	397	417	GUGAAGUGUUUGGGGGAACUC	GAGUUCCUCCAAGCACUUCAU	Cleavage	seq=cds; coord=5:7702336..7706201:1; parent_gene=GRMZM2G051270	1
zma-miR395f-3p	gnl|ZmGDB|GRMZM2G051270_T02	1.5	19.86	1	21	13	33	GUGAAGUGUUUGGGGGAACUC	GAGUUCCUCCAAGCACUUCAU	Cleavage	seq=cds; coord=5:7702370..7706207:1; parent_gene=GRMZM2G051270	1
zma-miR395f-3p	gnl|ZmGDB|GRMZM2G134044_T01	3	21.943	1	20	606	625	GUGAAGUGUUUGGGGGAACU	GGUUUCCCCAAAUGCUUCGU	Cleavage	seq=cds; coord=10:102234290..102238464:-1; parent_gene=GRMZM2G134044	1
zma-miR395f-3p	gnl|ZmGDB|GRMZM2G134044_T02	3	21.943	1	20	606	625	GUGAAGUGUUUGGGGGAACU	GGUUUCCCCAAAUGCUUCGU	Cleavage	seq=cds; coord=10:102234290..102238464:-1; parent_gene=GRMZM2G134044	1
zma-miR395f-3p	gnl|ZmGDB|GRMZM2G134044_T03	3	21.943	1	20	606	625	GUGAAGUGUUUGGGGGAACU	GGUUUCCCCAAAUGCUUCGU	Cleavage	seq=cds; coord=10:102234290..102238413:-1; parent_gene=GRMZM2G134044	1
zma-miR395g-5p	gnl|ZmGDB|GRMZM2G368678_T01	2.5	18.525	1	21	339	359	GUUCUAUGCAAGCACUUCACG	UGUGGAGUGCUUACAUGGAAU	Translation	seq=cds; coord=6:119676436..119695343:-1; parent_gene=GRMZM2G368678	1
zma-miR395g-5p	gnl|ZmGDB|GRMZM2G029356_T01	2.5	19.2	1	20	369	388	GUUCUAUGCAAGCACUUCAC	GUCAAGUUCUUGCGUAGAAC	Cleavage	seq=cds; coord=2:41009883..41019487:-1; parent_gene=GRMZM2G029356	1
zma-miR395g-5p	gnl|ZmGDB|GRMZM2G029356_T02	2.5	19.2	1	20	414	433	GUUCUAUGCAAGCACUUCAC	GUCAAGUUCUUGCGUAGAAC	Cleavage	seq=cds; coord=2:41010304..41019487:-1; parent_gene=GRMZM2G029356	1
zma-miR395g-3p	gnl|ZmGDB|GRMZM2G149952_T01	1	21.484	1	21	391	411	GUGAAGUGUUUGGGGGAACUC	GAGUUCCUCCAAACACUUCAU	Cleavage	seq=cds; coord=1:275090703..275094517:-1; parent_gene=GRMZM2G149952	1
zma-miR395g-3p	gnl|ZmGDB|GRMZM2G051270_T01	1.5	22.338	1	21	397	417	GUGAAGUGUUUGGGGGAACUC	GAGUUCCUCCAAGCACUUCAU	Cleavage	seq=cds; coord=5:7702248..7706223:1; parent_gene=GRMZM2G051270	1
zma-miR395g-3p	gnl|ZmGDB|GRMZM2G051270_T03	1.5	22.338	1	21	397	417	GUGAAGUGUUUGGGGGAACUC	GAGUUCCUCCAAGCACUUCAU	Cleavage	seq=cds; coord=5:7702336..7706201:1; parent_gene=GRMZM2G051270	1
zma-miR395g-3p	gnl|ZmGDB|GRMZM2G051270_T02	1.5	19.86	1	21	13	33	GUGAAGUGUUUGGGGGAACUC	GAGUUCCUCCAAGCACUUCAU	Cleavage	seq=cds; coord=5:7702370..7706207:1; parent_gene=GRMZM2G051270	1
zma-miR395g-3p	gnl|ZmGDB|GRMZM2G134044_T01	3	21.943	1	20	606	625	GUGAAGUGUUUGGGGGAACU	GGUUUCCCCAAAUGCUUCGU	Cleavage	seq=cds; coord=10:102234290..102238464:-1; parent_gene=GRMZM2G134044	1
zma-miR395g-3p	gnl|ZmGDB|GRMZM2G134044_T02	3	21.943	1	20	606	625	GUGAAGUGUUUGGGGGAACU	GGUUUCCCCAAAUGCUUCGU	Cleavage	seq=cds; coord=10:102234290..102238464:-1; parent_gene=GRMZM2G134044	1
zma-miR395g-3p	gnl|ZmGDB|GRMZM2G134044_T03	3	21.943	1	20	606	625	GUGAAGUGUUUGGGGGAACU	GGUUUCCCCAAAUGCUUCGU	Cleavage	seq=cds; coord=10:102234290..102238413:-1; parent_gene=GRMZM2G134044	1
zma-miR395h-5p	gnl|ZmGDB|GRMZM2G420988_T01	1.5	14.876	1	20	245	264	GUUCCCUUCAAGCACUUCAC	GUGAAGUGUUUGGAGGGAAU	Cleavage	seq=cds; coord=9:43679893..43682735:-1; parent_gene=GRMZM2G420988	1
zma-miR395h-5p	gnl|ZmGDB|GRMZM2G043238_T03	2.5	17.01	1	20	1151	1170	GUUCCCUUCAAGCACUUCAC	GUGAAGAGCUUGAGGGGAAG	Cleavage	seq=cds; coord=8:48111105..48115366:1; parent_gene=GRMZM2G043238	1
zma-miR395h-5p	gnl|ZmGDB|GRMZM2G043238_T02	2.5	17.01	1	20	1445	1464	GUUCCCUUCAAGCACUUCAC	GUGAAGAGCUUGAGGGGAAG	Cleavage	seq=cds; coord=8:48088346..48116467:1; parent_gene=GRMZM2G043238	1
zma-miR395h-5p	gnl|ZmGDB|GRMZM2G043238_T01	2.5	17.01	1	20	1151	1170	GUUCCCUUCAAGCACUUCAC	GUGAAGAGCUUGAGGGGAAG	Cleavage	seq=cds; coord=8:48111105..48135622:1; parent_gene=GRMZM2G043238	1
zma-miR395h-5p	gnl|ZmGDB|GRMZM2G059381_T03	3	18.583	1	20	149	168	GUUCCCUUCAAGCACUUCAC	GUGAAGUUCUUGAAGGGUAU	Cleavage	seq=cds; coord=4:187594531..187598231:-1; parent_gene=GRMZM2G059381	1
zma-miR395h-5p	gnl|ZmGDB|GRMZM2G059381_T01	3	18.583	1	20	1313	1332	GUUCCCUUCAAGCACUUCAC	GUGAAGUUCUUGAAGGGUAU	Cleavage	seq=cds; coord=4:187594517..187604906:-1; parent_gene=GRMZM2G059381	1
zma-miR395h-3p	gnl|ZmGDB|GRMZM2G149952_T01	1	21.484	1	21	391	411	GUGAAGUGUUUGGGGGAACUC	GAGUUCCUCCAAACACUUCAU	Cleavage	seq=cds; coord=1:275090703..275094517:-1; parent_gene=GRMZM2G149952	1
zma-miR395h-3p	gnl|ZmGDB|GRMZM2G051270_T01	1.5	22.338	1	21	397	417	GUGAAGUGUUUGGGGGAACUC	GAGUUCCUCCAAGCACUUCAU	Cleavage	seq=cds; coord=5:7702248..7706223:1; parent_gene=GRMZM2G051270	1
zma-miR395h-3p	gnl|ZmGDB|GRMZM2G051270_T03	1.5	22.338	1	21	397	417	GUGAAGUGUUUGGGGGAACUC	GAGUUCCUCCAAGCACUUCAU	Cleavage	seq=cds; coord=5:7702336..7706201:1; parent_gene=GRMZM2G051270	1
zma-miR395h-3p	gnl|ZmGDB|GRMZM2G051270_T02	1.5	19.86	1	21	13	33	GUGAAGUGUUUGGGGGAACUC	GAGUUCCUCCAAGCACUUCAU	Cleavage	seq=cds; coord=5:7702370..7706207:1; parent_gene=GRMZM2G051270	1
zma-miR395h-3p	gnl|ZmGDB|GRMZM2G134044_T01	3	21.943	1	20	606	625	GUGAAGUGUUUGGGGGAACU	GGUUUCCCCAAAUGCUUCGU	Cleavage	seq=cds; coord=10:102234290..102238464:-1; parent_gene=GRMZM2G134044	1
zma-miR395h-3p	gnl|ZmGDB|GRMZM2G134044_T02	3	21.943	1	20	606	625	GUGAAGUGUUUGGGGGAACU	GGUUUCCCCAAAUGCUUCGU	Cleavage	seq=cds; coord=10:102234290..102238464:-1; parent_gene=GRMZM2G134044	1
zma-miR395h-3p	gnl|ZmGDB|GRMZM2G134044_T03	3	21.943	1	20	606	625	GUGAAGUGUUUGGGGGAACU	GGUUUCCCCAAAUGCUUCGU	Cleavage	seq=cds; coord=10:102234290..102238413:-1; parent_gene=GRMZM2G134044	1
zma-miR395i-5p	gnl|ZmGDB|GRMZM2G420988_T01	2	14.876	1	21	244	264	GUUCCCUACAAGCACUUCACG	CGUGAAGUGUUUGGAGGGAAU	Cleavage	seq=cds; coord=9:43679893..43682735:-1; parent_gene=GRMZM2G420988	1
zma-miR395i-5p	gnl|ZmGDB|GRMZM2G136366_T01	2.5	19.693	1	19	1599	1618	GUUCCCUA-CAAGCACUUCA	UGAAGUGCUUGGUAGGGGAC	Translation	seq=cds; coord=1:182283135..182290570:1; parent_gene=GRMZM2G136366	1
zma-miR395i-3p	gnl|ZmGDB|GRMZM2G149952_T01	1	21.484	1	21	391	411	GUGAAGUGUUUGGGGGAACUC	GAGUUCCUCCAAACACUUCAU	Cleavage	seq=cds; coord=1:275090703..275094517:-1; parent_gene=GRMZM2G149952	1
zma-miR395i-3p	gnl|ZmGDB|GRMZM2G051270_T01	1.5	22.338	1	21	397	417	GUGAAGUGUUUGGGGGAACUC	GAGUUCCUCCAAGCACUUCAU	Cleavage	seq=cds; coord=5:7702248..7706223:1; parent_gene=GRMZM2G051270	1
zma-miR395i-3p	gnl|ZmGDB|GRMZM2G051270_T03	1.5	22.338	1	21	397	417	GUGAAGUGUUUGGGGGAACUC	GAGUUCCUCCAAGCACUUCAU	Cleavage	seq=cds; coord=5:7702336..7706201:1; parent_gene=GRMZM2G051270	1
zma-miR395i-3p	gnl|ZmGDB|GRMZM2G051270_T02	1.5	19.86	1	21	13	33	GUGAAGUGUUUGGGGGAACUC	GAGUUCCUCCAAGCACUUCAU	Cleavage	seq=cds; coord=5:7702370..7706207:1; parent_gene=GRMZM2G051270	1
zma-miR395i-3p	gnl|ZmGDB|GRMZM2G134044_T01	3	21.943	1	20	606	625	GUGAAGUGUUUGGGGGAACU	GGUUUCCCCAAAUGCUUCGU	Cleavage	seq=cds; coord=10:102234290..102238464:-1; parent_gene=GRMZM2G134044	1
zma-miR395i-3p	gnl|ZmGDB|GRMZM2G134044_T02	3	21.943	1	20	606	625	GUGAAGUGUUUGGGGGAACU	GGUUUCCCCAAAUGCUUCGU	Cleavage	seq=cds; coord=10:102234290..102238464:-1; parent_gene=GRMZM2G134044	1
zma-miR395i-3p	gnl|ZmGDB|GRMZM2G134044_T03	3	21.943	1	20	606	625	GUGAAGUGUUUGGGGGAACU	GGUUUCCCCAAAUGCUUCGU	Cleavage	seq=cds; coord=10:102234290..102238413:-1; parent_gene=GRMZM2G134044	1
zma-miR395j-5p	gnl|ZmGDB|GRMZM2G420988_T01	1.5	14.876	1	20	245	264	GUUCCCUUCAAGCACUUCAC	GUGAAGUGUUUGGAGGGAAU	Cleavage	seq=cds; coord=9:43679893..43682735:-1; parent_gene=GRMZM2G420988	1
zma-miR395j-5p	gnl|ZmGDB|GRMZM2G043238_T03	2.5	17.01	1	20	1151	1170	GUUCCCUUCAAGCACUUCAC	GUGAAGAGCUUGAGGGGAAG	Cleavage	seq=cds; coord=8:48111105..48115366:1; parent_gene=GRMZM2G043238	1
zma-miR395j-5p	gnl|ZmGDB|GRMZM2G043238_T02	2.5	17.01	1	20	1445	1464	GUUCCCUUCAAGCACUUCAC	GUGAAGAGCUUGAGGGGAAG	Cleavage	seq=cds; coord=8:48088346..48116467:1; parent_gene=GRMZM2G043238	1
zma-miR395j-5p	gnl|ZmGDB|GRMZM2G043238_T01	2.5	17.01	1	20	1151	1170	GUUCCCUUCAAGCACUUCAC	GUGAAGAGCUUGAGGGGAAG	Cleavage	seq=cds; coord=8:48111105..48135622:1; parent_gene=GRMZM2G043238	1
zma-miR395j-5p	gnl|ZmGDB|GRMZM2G059381_T03	3	18.583	1	20	149	168	GUUCCCUUCAAGCACUUCAC	GUGAAGUUCUUGAAGGGUAU	Cleavage	seq=cds; coord=4:187594531..187598231:-1; parent_gene=GRMZM2G059381	1
zma-miR395j-5p	gnl|ZmGDB|GRMZM2G059381_T01	3	18.583	1	20	1313	1332	GUUCCCUUCAAGCACUUCAC	GUGAAGUUCUUGAAGGGUAU	Cleavage	seq=cds; coord=4:187594517..187604906:-1; parent_gene=GRMZM2G059381	1
zma-miR395j-3p	gnl|ZmGDB|GRMZM2G149952_T01	1	21.484	1	21	391	411	GUGAAGUGUUUGGGGGAACUC	GAGUUCCUCCAAACACUUCAU	Cleavage	seq=cds; coord=1:275090703..275094517:-1; parent_gene=GRMZM2G149952	1
zma-miR395j-3p	gnl|ZmGDB|GRMZM2G051270_T01	1.5	22.338	1	21	397	417	GUGAAGUGUUUGGGGGAACUC	GAGUUCCUCCAAGCACUUCAU	Cleavage	seq=cds; coord=5:7702248..7706223:1; parent_gene=GRMZM2G051270	1
zma-miR395j-3p	gnl|ZmGDB|GRMZM2G051270_T03	1.5	22.338	1	21	397	417	GUGAAGUGUUUGGGGGAACUC	GAGUUCCUCCAAGCACUUCAU	Cleavage	seq=cds; coord=5:7702336..7706201:1; parent_gene=GRMZM2G051270	1
zma-miR395j-3p	gnl|ZmGDB|GRMZM2G051270_T02	1.5	19.86	1	21	13	33	GUGAAGUGUUUGGGGGAACUC	GAGUUCCUCCAAGCACUUCAU	Cleavage	seq=cds; coord=5:7702370..7706207:1; parent_gene=GRMZM2G051270	1
zma-miR395j-3p	gnl|ZmGDB|GRMZM2G134044_T01	3	21.943	1	20	606	625	GUGAAGUGUUUGGGGGAACU	GGUUUCCCCAAAUGCUUCGU	Cleavage	seq=cds; coord=10:102234290..102238464:-1; parent_gene=GRMZM2G134044	1
zma-miR395j-3p	gnl|ZmGDB|GRMZM2G134044_T02	3	21.943	1	20	606	625	GUGAAGUGUUUGGGGGAACU	GGUUUCCCCAAAUGCUUCGU	Cleavage	seq=cds; coord=10:102234290..102238464:-1; parent_gene=GRMZM2G134044	1
zma-miR395j-3p	gnl|ZmGDB|GRMZM2G134044_T03	3	21.943	1	20	606	625	GUGAAGUGUUUGGGGGAACU	GGUUUCCCCAAAUGCUUCGU	Cleavage	seq=cds; coord=10:102234290..102238413:-1; parent_gene=GRMZM2G134044	1
zma-miR395k-5p	gnl|ZmGDB|GRMZM2G420988_T01	2	14.876	1	20	245	264	GUUUCCUUCAAGCACUUCAC	GUGAAGUGUUUGGAGGGAAU	Cleavage	seq=cds; coord=9:43679893..43682735:-1; parent_gene=GRMZM2G420988	1
zma-miR395k-5p	gnl|ZmGDB|GRMZM2G475373_T01	2.5	22.332	1	22	33	54	GUUUCCUUCAAGCACUUCACAU	AAGUGAAGUCCUUGAAGGAGAG	Cleavage	seq=cds; coord=6:152845296..152845815:1; parent_gene=GRMZM2G475373	1
zma-miR395k-5p	gnl|ZmGDB|GRMZM2G108615_T01	3	16.428	1	22	729	750	GUUUCCUUCAAGCACUUCACAU	AGGUGGAGGGCUUGGAGGAGGC	Cleavage	seq=cds; coord=7:152524945..152526919:1; parent_gene=GRMZM2G108615	1
zma-miR395k-5p	gnl|ZmGDB|GRMZM2G043238_T03	3	17.01	1	20	1151	1170	GUUUCCUUCAAGCACUUCAC	GUGAAGAGCUUGAGGGGAAG	Cleavage	seq=cds; coord=8:48111105..48115366:1; parent_gene=GRMZM2G043238	1
zma-miR395k-5p	gnl|ZmGDB|GRMZM2G155762_T01	3	14.713	1	20	1115	1134	GUUUCCUUCAAGCACUUCAC	AUGGAGGGCUUGGAGGAAAC	Cleavage	seq=cds; coord=10:137658752..137664934:1; parent_gene=GRMZM2G155762	1
zma-miR395k-5p	gnl|ZmGDB|GRMZM2G043238_T02	3	17.01	1	20	1445	1464	GUUUCCUUCAAGCACUUCAC	GUGAAGAGCUUGAGGGGAAG	Cleavage	seq=cds; coord=8:48088346..48116467:1; parent_gene=GRMZM2G043238	1
zma-miR395k-5p	gnl|ZmGDB|GRMZM2G043238_T01	3	17.01	1	20	1151	1170	GUUUCCUUCAAGCACUUCAC	GUGAAGAGCUUGAGGGGAAG	Cleavage	seq=cds; coord=8:48111105..48135622:1; parent_gene=GRMZM2G043238	1
zma-miR395k-3p	gnl|ZmGDB|GRMZM2G048276_T01	2.5	11.112	1	20	2265	2284	GUGAAGUGUUUGAGGAAACU	AGUUUCUUCAGAUGCUUCAU	Cleavage	seq=cds; coord=1:210219079..210224111:1; parent_gene=GRMZM2G048276	1
zma-miR395k-3p	gnl|ZmGDB|GRMZM2G053500_T01	2.5	17.237	1	20	819	838	GUGAAGUGUUUGAGGAAACU	AGUUUCUUUUGACACUUCAC	Translation	seq=cds; coord=5:60029026..60035483:-1; parent_gene=GRMZM2G053500	1
zma-miR395k-3p	gnl|ZmGDB|GRMZM2G149952_T01	3	21.484	1	21	391	411	GUGAAGUGUUUGAGGAAACUC	GAGUUCCUCCAAACACUUCAU	Cleavage	seq=cds; coord=1:275090703..275094517:-1; parent_gene=GRMZM2G149952	1
zma-miR395k-3p	gnl|ZmGDB|GRMZM2G021299_T01	3	14.467	1	20	10696	10715	GUGAAGUGUUUGAGGAAACU	GGUUUCCUUGAAGGCUUCAC	Cleavage	seq=cds; coord=2:155072701..155102547:1; parent_gene=GRMZM2G021299	1
zma-miR395l-5p	gnl|ZmGDB|GRMZM2G420988_T01	1	14.876	1	20	245	264	GUUCCUUCCAAACACUUCAC	GUGAAGUGUUUGGAGGGAAU	Cleavage	seq=cds; coord=9:43679893..43682735:-1; parent_gene=GRMZM2G420988	1
zma-miR395l-5p	gnl|ZmGDB|GRMZM2G068755_T03	3	20.557	1	20	398	417	GUUCCUUCCAAACACUUCAC	AAGAAGUGGUUGGAAGGAAC	Cleavage	seq=cds; coord=8:170827205..170854528:1; parent_gene=GRMZM2G068755	1
zma-miR395l-5p	gnl|ZmGDB|GRMZM2G068755_T01	3	20.557	1	20	3143	3162	GUUCCUUCCAAACACUUCAC	AAGAAGUGGUUGGAAGGAAC	Cleavage	seq=cds; coord=8:170827069..170854528:1; parent_gene=GRMZM2G068755	1
zma-miR395l-3p	gnl|ZmGDB|GRMZM2G149952_T01	0.5	21.484	1	21	391	411	GUGAAGUGUUUGGAGGAACUC	GAGUUCCUCCAAACACUUCAU	Cleavage	seq=cds; coord=1:275090703..275094517:-1; parent_gene=GRMZM2G149952	1
zma-miR395l-3p	gnl|ZmGDB|GRMZM2G051270_T01	1	22.338	1	21	397	417	GUGAAGUGUUUGGAGGAACUC	GAGUUCCUCCAAGCACUUCAU	Cleavage	seq=cds; coord=5:7702248..7706223:1; parent_gene=GRMZM2G051270	1
zma-miR395l-3p	gnl|ZmGDB|GRMZM2G051270_T03	1	22.338	1	21	397	417	GUGAAGUGUUUGGAGGAACUC	GAGUUCCUCCAAGCACUUCAU	Cleavage	seq=cds; coord=5:7702336..7706201:1; parent_gene=GRMZM2G051270	1
zma-miR395l-3p	gnl|ZmGDB|GRMZM2G051270_T02	1	19.86	1	21	13	33	GUGAAGUGUUUGGAGGAACUC	GAGUUCCUCCAAGCACUUCAU	Cleavage	seq=cds; coord=5:7702370..7706207:1; parent_gene=GRMZM2G051270	1
zma-miR395l-3p	gnl|ZmGDB|GRMZM2G048276_T01	3	11.112	1	20	2265	2284	GUGAAGUGUUUGGAGGAACU	AGUUUCUUCAGAUGCUUCAU	Cleavage	seq=cds; coord=1:210219079..210224111:1; parent_gene=GRMZM2G048276	1
zma-miR395l-3p	gnl|ZmGDB|GRMZM2G049288_T01	3	23.411	1	20	918	937	GUGAAGUGUUUGGAGGAACU	UGUUCUUACAAGCACUUCAC	Cleavage	seq=cds; coord=9:111981488..112003339:1; parent_gene=GRMZM2G049288	1
zma-miR395l-3p	gnl|ZmGDB|GRMZM2G024887_T01	3	24.61	1	21	213	233	GUGAAGUGUUUGGAGGAACUC	GAGCUUCUCCAAGAACUUCAC	Cleavage	seq=cds; coord=10:132702049..132703602:-1; parent_gene=GRMZM2G024887	1
zma-miR395l-3p	gnl|ZmGDB|GRMZM2G153268_T01	3	22.996	1	21	210	230	GUGAAGUGUUUGGAGGAACUC	GAGCUUCUCCAAGAACUUCAC	Cleavage	seq=cds; coord=2:23133999..23135553:1; parent_gene=GRMZM2G153268	1
zma-miR395m-5p	gnl|ZmGDB|GRMZM2G420988_T01	1.5	14.876	1	20	245	264	GUUCCUUUCAAACACUUCAC	GUGAAGUGUUUGGAGGGAAU	Cleavage	seq=cds; coord=9:43679893..43682735:-1; parent_gene=GRMZM2G420988	1
zma-miR395m-5p	gnl|ZmGDB|GRMZM2G121404_T02	2.5	16.305	1	22	405	426	GUUCCUUUCAAACACUUCACAU	ACGUGAAGAGUUUGAAAGGGAA	Cleavage	seq=cds; coord=3:37667449..37676419:-1; parent_gene=GRMZM2G121404	1
zma-miR395m-5p	gnl|ZmGDB|GRMZM2G121404_T01	2.5	16.305	1	22	405	426	GUUCCUUUCAAACACUUCACAU	ACGUGAAGAGUUUGAAAGGGAA	Cleavage	seq=cds; coord=3:37666993..37676437:-1; parent_gene=GRMZM2G121404	1
zma-miR395m-5p	gnl|ZmGDB|GRMZM2G064868_T03	3	21.087	1	20	407	426	GUUCCUUUCAAACACUUCAC	GUGAAGAGUUUGAGAGGGAA	Cleavage	seq=cds; coord=4:29116247..29128767:1; parent_gene=GRMZM2G064868	1
zma-miR395m-5p	gnl|ZmGDB|GRMZM2G064868_T02	3	21.087	1	20	407	426	GUUCCUUUCAAACACUUCAC	GUGAAGAGUUUGAGAGGGAA	Cleavage	seq=cds; coord=4:29116247..29128823:1; parent_gene=GRMZM2G064868	1
zma-miR395m-3p	gnl|ZmGDB|GRMZM2G149952_T01	0.5	21.484	1	21	391	411	GUGAAGUGUUUGGAGGAACUC	GAGUUCCUCCAAACACUUCAU	Cleavage	seq=cds; coord=1:275090703..275094517:-1; parent_gene=GRMZM2G149952	1
zma-miR395m-3p	gnl|ZmGDB|GRMZM2G051270_T01	1	22.338	1	21	397	417	GUGAAGUGUUUGGAGGAACUC	GAGUUCCUCCAAGCACUUCAU	Cleavage	seq=cds; coord=5:7702248..7706223:1; parent_gene=GRMZM2G051270	1
zma-miR395m-3p	gnl|ZmGDB|GRMZM2G051270_T03	1	22.338	1	21	397	417	GUGAAGUGUUUGGAGGAACUC	GAGUUCCUCCAAGCACUUCAU	Cleavage	seq=cds; coord=5:7702336..7706201:1; parent_gene=GRMZM2G051270	1
zma-miR395m-3p	gnl|ZmGDB|GRMZM2G051270_T02	1	19.86	1	21	13	33	GUGAAGUGUUUGGAGGAACUC	GAGUUCCUCCAAGCACUUCAU	Cleavage	seq=cds; coord=5:7702370..7706207:1; parent_gene=GRMZM2G051270	1
zma-miR395m-3p	gnl|ZmGDB|GRMZM2G048276_T01	3	11.112	1	20	2265	2284	GUGAAGUGUUUGGAGGAACU	AGUUUCUUCAGAUGCUUCAU	Cleavage	seq=cds; coord=1:210219079..210224111:1; parent_gene=GRMZM2G048276	1
zma-miR395m-3p	gnl|ZmGDB|GRMZM2G049288_T01	3	23.411	1	20	918	937	GUGAAGUGUUUGGAGGAACU	UGUUCUUACAAGCACUUCAC	Cleavage	seq=cds; coord=9:111981488..112003339:1; parent_gene=GRMZM2G049288	1
zma-miR395m-3p	gnl|ZmGDB|GRMZM2G024887_T01	3	24.61	1	21	213	233	GUGAAGUGUUUGGAGGAACUC	GAGCUUCUCCAAGAACUUCAC	Cleavage	seq=cds; coord=10:132702049..132703602:-1; parent_gene=GRMZM2G024887	1
zma-miR395m-3p	gnl|ZmGDB|GRMZM2G153268_T01	3	22.996	1	21	210	230	GUGAAGUGUUUGGAGGAACUC	GAGCUUCUCCAAGAACUUCAC	Cleavage	seq=cds; coord=2:23133999..23135553:1; parent_gene=GRMZM2G153268	1
zma-miR395n-5p	gnl|ZmGDB|GRMZM2G134917_T01	3	15.01	1	22	666	687	GUUCUCUACAAGCACUUCACGA	UCUUGAAGUGUUUGUGGAGAAA	Cleavage	seq=cds; coord=1:285920953..285924151:1; parent_gene=GRMZM2G134917	1
zma-miR395n-5p	gnl|ZmGDB|GRMZM2G420988_T01	2.5	14.876	1	21	244	264	GUUCUCUACAAGCACUUCACG	CGUGAAGUGUUUGGAGGGAAU	Cleavage	seq=cds; coord=9:43679893..43682735:-1; parent_gene=GRMZM2G420988	1
zma-miR395n-5p	gnl|ZmGDB|GRMZM2G169154_T01	3	21.094	1	20	1	20	GUUCUCUACAAGCACUUCAC	AUGAAGUGCUUGUGGAAAAC	Cleavage	seq=cds; coord=8:140394318..140397324:-1; parent_gene=GRMZM2G169154	1
zma-miR395n-5p	gnl|ZmGDB|GRMZM2G041312_T03	3	21.552	1	20	1	20	GUUCUCUACAAGCACUUCAC	AUGAAGUGCUUGUGGAAAAC	Cleavage	seq=cds; coord=2:62099312..62102748:1; parent_gene=GRMZM2G041312	1
zma-miR395n-5p	gnl|ZmGDB|GRMZM2G169154_T02	3	18.299	1	20	83	102	GUUCUCUACAAGCACUUCAC	AUGAAGUGCUUGUGGAAAAC	Cleavage	seq=cds; coord=8:140394318..140397324:-1; parent_gene=GRMZM2G169154	1
zma-miR395n-5p	gnl|ZmGDB|GRMZM5G845175_T01	3	15.927	1	20	224	243	GUUCUCUACAAGCACUUCAC	AUGAAGUGCUUGUGGAAAAC	Cleavage	seq=cds; coord=10:112394528..112402120:-1; parent_gene=GRMZM5G845175	1
zma-miR395n-5p	gnl|ZmGDB|GRMZM2G341166_T01	3	17.202	1	20	314	333	GUUCUCUACAAGCACUUCAC	AUGAAGUGCUUGUGGAAAAC	Cleavage	seq=cds; coord=8:166556514..166558456:1; parent_gene=GRMZM2G341166	1
zma-miR395n-5p	gnl|ZmGDB|GRMZM2G347635_T01	3	17.202	1	20	572	591	GUUCUCUACAAGCACUUCAC	AUGAAGUGCUUGUGGAAAAC	Cleavage	seq=cds; coord=10:100472829..100475353:1; parent_gene=GRMZM2G347635	1
zma-miR395n-5p	gnl|ZmGDB|GRMZM5G845175_T03	3	15.927	1	20	224	243	GUUCUCUACAAGCACUUCAC	AUGAAGUGCUUGUGGAAAAC	Cleavage	seq=cds; coord=10:112394528..112402120:-1; parent_gene=GRMZM5G845175	1
zma-miR395n-5p	gnl|ZmGDB|GRMZM2G041312_T01	3	15.745	1	20	224	243	GUUCUCUACAAGCACUUCAC	AUGAAGUGCUUGUGGAAAAC	Cleavage	seq=cds; coord=2:62099154..62113990:1; parent_gene=GRMZM2G041312	1
zma-miR395n-3p	gnl|ZmGDB|GRMZM2G149952_T01	1	21.484	1	21	391	411	GUGAAGUGUUUGGGGGAACUC	GAGUUCCUCCAAACACUUCAU	Cleavage	seq=cds; coord=1:275090703..275094517:-1; parent_gene=GRMZM2G149952	1
zma-miR395n-3p	gnl|ZmGDB|GRMZM2G051270_T01	1.5	22.338	1	21	397	417	GUGAAGUGUUUGGGGGAACUC	GAGUUCCUCCAAGCACUUCAU	Cleavage	seq=cds; coord=5:7702248..7706223:1; parent_gene=GRMZM2G051270	1
zma-miR395n-3p	gnl|ZmGDB|GRMZM2G051270_T03	1.5	22.338	1	21	397	417	GUGAAGUGUUUGGGGGAACUC	GAGUUCCUCCAAGCACUUCAU	Cleavage	seq=cds; coord=5:7702336..7706201:1; parent_gene=GRMZM2G051270	1
zma-miR395n-3p	gnl|ZmGDB|GRMZM2G051270_T02	1.5	19.86	1	21	13	33	GUGAAGUGUUUGGGGGAACUC	GAGUUCCUCCAAGCACUUCAU	Cleavage	seq=cds; coord=5:7702370..7706207:1; parent_gene=GRMZM2G051270	1
zma-miR395n-3p	gnl|ZmGDB|GRMZM2G134044_T01	3	21.943	1	20	606	625	GUGAAGUGUUUGGGGGAACU	GGUUUCCCCAAAUGCUUCGU	Cleavage	seq=cds; coord=10:102234290..102238464:-1; parent_gene=GRMZM2G134044	1
zma-miR395n-3p	gnl|ZmGDB|GRMZM2G134044_T02	3	21.943	1	20	606	625	GUGAAGUGUUUGGGGGAACU	GGUUUCCCCAAAUGCUUCGU	Cleavage	seq=cds; coord=10:102234290..102238464:-1; parent_gene=GRMZM2G134044	1
zma-miR395n-3p	gnl|ZmGDB|GRMZM2G134044_T03	3	21.943	1	20	606	625	GUGAAGUGUUUGGGGGAACU	GGUUUCCCCAAAUGCUUCGU	Cleavage	seq=cds; coord=10:102234290..102238413:-1; parent_gene=GRMZM2G134044	1
zma-miR395o-5p	gnl|ZmGDB|GRMZM2G420988_T01	2	14.876	1	21	244	264	GUUCUCUUCAAGCACUUCACG	CGUGAAGUGUUUGGAGGGAAU	Cleavage	seq=cds; coord=9:43679893..43682735:-1; parent_gene=GRMZM2G420988	1
zma-miR395o-5p	gnl|ZmGDB|GRMZM2G092321_T01	3	13.481	1	22	198	219	GUUCUCUUCAAGCACUUCACGA	UUGUAAAGUGCUUGAAGAUGAC	Cleavage	seq=cds; coord=4:228012641..228014534:1; parent_gene=GRMZM2G092321	1
zma-miR395o-5p	gnl|ZmGDB|GRMZM2G043238_T03	3	17.01	1	20	1151	1170	GUUCUCUUCAAGCACUUCAC	GUGAAGAGCUUGAGGGGAAG	Cleavage	seq=cds; coord=8:48111105..48115366:1; parent_gene=GRMZM2G043238	1
zma-miR395o-3p	gnl|ZmGDB|GRMZM2G149952_T01	2	21.484	1	21	391	411	GUGAAGUGUUUGGGUGAACUC	GAGUUCCUCCAAACACUUCAU	Cleavage	seq=cds; coord=1:275090703..275094517:-1; parent_gene=GRMZM2G149952	1
zma-miR395o-3p	gnl|ZmGDB|GRMZM2G051270_T01	2.5	22.338	1	21	397	417	GUGAAGUGUUUGGGUGAACUC	GAGUUCCUCCAAGCACUUCAU	Cleavage	seq=cds; coord=5:7702248..7706223:1; parent_gene=GRMZM2G051270	1
zma-miR395o-3p	gnl|ZmGDB|GRMZM2G051270_T03	2.5	22.338	1	21	397	417	GUGAAGUGUUUGGGUGAACUC	GAGUUCCUCCAAGCACUUCAU	Cleavage	seq=cds; coord=5:7702336..7706201:1; parent_gene=GRMZM2G051270	1
zma-miR395o-3p	gnl|ZmGDB|GRMZM2G051270_T02	2.5	19.86	1	21	13	33	GUGAAGUGUUUGGGUGAACUC	GAGUUCCUCCAAGCACUUCAU	Cleavage	seq=cds; coord=5:7702370..7706207:1; parent_gene=GRMZM2G051270	1
zma-miR395o-3p	gnl|ZmGDB|AC182819.4_FGT003	3	16.499	1	20	33	52	GUGAAGUGUUUGGGUGAACU	UGUUUACCCAACCACUUCAU	Translation	seq=cds; coord=4:145915013..145915910:-1; parent_gene=AC182819.4_FG003	1
zma-miR395o-3p	gnl|ZmGDB|GRMZM5G891425_T01	3	20.815	1	20	25	44	GUGAAGUGUUUGGGUGAACU	AGCUCGCCCGGACGCUUCAC	Cleavage	seq=cds; coord=1:136798863..136800526:1; parent_gene=GRMZM5G891425	1
zma-miR395p-5p	gnl|ZmGDB|GRMZM2G420988_T01	1.5	14.876	1	20	245	264	GUUCCCUUCAAGCACUUCAC	GUGAAGUGUUUGGAGGGAAU	Cleavage	seq=cds; coord=9:43679893..43682735:-1; parent_gene=GRMZM2G420988	1
zma-miR395p-5p	gnl|ZmGDB|GRMZM2G043238_T03	2.5	17.01	1	20	1151	1170	GUUCCCUUCAAGCACUUCAC	GUGAAGAGCUUGAGGGGAAG	Cleavage	seq=cds; coord=8:48111105..48115366:1; parent_gene=GRMZM2G043238	1
zma-miR395p-5p	gnl|ZmGDB|GRMZM2G043238_T02	2.5	17.01	1	20	1445	1464	GUUCCCUUCAAGCACUUCAC	GUGAAGAGCUUGAGGGGAAG	Cleavage	seq=cds; coord=8:48088346..48116467:1; parent_gene=GRMZM2G043238	1
zma-miR395p-5p	gnl|ZmGDB|GRMZM2G043238_T01	2.5	17.01	1	20	1151	1170	GUUCCCUUCAAGCACUUCAC	GUGAAGAGCUUGAGGGGAAG	Cleavage	seq=cds; coord=8:48111105..48135622:1; parent_gene=GRMZM2G043238	1
zma-miR395p-5p	gnl|ZmGDB|GRMZM2G059381_T03	3	18.583	1	20	149	168	GUUCCCUUCAAGCACUUCAC	GUGAAGUUCUUGAAGGGUAU	Cleavage	seq=cds; coord=4:187594531..187598231:-1; parent_gene=GRMZM2G059381	1
zma-miR395p-5p	gnl|ZmGDB|GRMZM2G059381_T01	3	18.583	1	20	1313	1332	GUUCCCUUCAAGCACUUCAC	GUGAAGUUCUUGAAGGGUAU	Cleavage	seq=cds; coord=4:187594517..187604906:-1; parent_gene=GRMZM2G059381	1
zma-miR395p-3p	gnl|ZmGDB|GRMZM2G149952_T01	1	21.484	1	21	391	411	GUGAAGUGUUUGGGGGAACUC	GAGUUCCUCCAAACACUUCAU	Cleavage	seq=cds; coord=1:275090703..275094517:-1; parent_gene=GRMZM2G149952	1
zma-miR395p-3p	gnl|ZmGDB|GRMZM2G051270_T01	1.5	22.338	1	21	397	417	GUGAAGUGUUUGGGGGAACUC	GAGUUCCUCCAAGCACUUCAU	Cleavage	seq=cds; coord=5:7702248..7706223:1; parent_gene=GRMZM2G051270	1
zma-miR395p-3p	gnl|ZmGDB|GRMZM2G051270_T03	1.5	22.338	1	21	397	417	GUGAAGUGUUUGGGGGAACUC	GAGUUCCUCCAAGCACUUCAU	Cleavage	seq=cds; coord=5:7702336..7706201:1; parent_gene=GRMZM2G051270	1
zma-miR395p-3p	gnl|ZmGDB|GRMZM2G051270_T02	1.5	19.86	1	21	13	33	GUGAAGUGUUUGGGGGAACUC	GAGUUCCUCCAAGCACUUCAU	Cleavage	seq=cds; coord=5:7702370..7706207:1; parent_gene=GRMZM2G051270	1
zma-miR395p-3p	gnl|ZmGDB|GRMZM2G134044_T01	3	21.943	1	20	606	625	GUGAAGUGUUUGGGGGAACU	GGUUUCCCCAAAUGCUUCGU	Cleavage	seq=cds; coord=10:102234290..102238464:-1; parent_gene=GRMZM2G134044	1
zma-miR395p-3p	gnl|ZmGDB|GRMZM2G134044_T02	3	21.943	1	20	606	625	GUGAAGUGUUUGGGGGAACU	GGUUUCCCCAAAUGCUUCGU	Cleavage	seq=cds; coord=10:102234290..102238464:-1; parent_gene=GRMZM2G134044	1
zma-miR395p-3p	gnl|ZmGDB|GRMZM2G134044_T03	3	21.943	1	20	606	625	GUGAAGUGUUUGGGGGAACU	GGUUUCCCCAAAUGCUUCGU	Cleavage	seq=cds; coord=10:102234290..102238413:-1; parent_gene=GRMZM2G134044	1
zma-miR396e-5p	gnl|ZmGDB|GRMZM2G087671_T01	3	21.968	1	21	736	756	UUCCACAGCUUUCUUGAACUU	AAGUUUAAGAAAGCUGUCGAU	Cleavage	seq=cds; coord=6:135779127..135782735:1; parent_gene=GRMZM2G087671	1
zma-miR396e-5p	gnl|ZmGDB|GRMZM2G152526_T01	3	20.585	1	21	370	390	UUCCACAGCUUUCUUGAACUU	AAGUUUGGGAAGGUUGUGGAG	Cleavage	seq=cds; coord=1:143622295..143626633:1; parent_gene=GRMZM2G152526	1
zma-miR396e-5p	gnl|ZmGDB|GRMZM2G178983_T01	3	19.805	1	21	135	155	UUCCACAGCUUUCUUGAACUU	AAGGUCAAGAAAGCCGUGGGA	Cleavage	seq=cds; coord=4:173299838..173300267:-1; parent_gene=GRMZM2G178983	1
zma-miR396e-5p	gnl|ZmGDB|GRMZM2G156656_T01	3	21.789	1	21	805	825	UUCCACAGCUUUCUUGAACUU	GAGUUUAAGAAGGUUGUAGAA	Cleavage	seq=cds; coord=1:295470099..295474847:1; parent_gene=GRMZM2G156656	1
zma-miR396e-5p	gnl|ZmGDB|GRMZM2G517007_T01	3	16.296	1	21	14	34	UUCCACAGCUUUCUUGAACUU	GAGUUUGUGAGGGCUGUGGAA	Cleavage	seq=cds; coord=6:7094066..7095657:-1; parent_gene=GRMZM2G517007	1
zma-miR396e-5p	gnl|ZmGDB|GRMZM2G508397_T01	3	19.615	1	21	56	76	UUCCACAGCUUUCUUGAACUU	GAGUUUGUGAGGGCUGUGGAA	Cleavage	seq=cds; coord=2:196999509..197000799:1; parent_gene=GRMZM2G508397	1
zma-miR396e-5p	gnl|ZmGDB|GRMZM2G478709_T02	3	11.869	1	21	430	450	UUCCACAGCUUUCUUGAACUU	AAGGGUAAGAAAGCUGUGGAG	Cleavage	seq=cds; coord=4:179646912..179649237:1; parent_gene=GRMZM2G478709	1
zma-miR396e-5p	gnl|ZmGDB|GRMZM2G018939_T01	3	19.141	1	21	389	409	UUCCACAGCUUUCUUGAACUU	GAGUUUGUGAGGGCUGUGGAA	Cleavage	seq=cds; coord=5:29690552..29693564:1; parent_gene=GRMZM2G018939	1
zma-miR396e-5p	gnl|ZmGDB|GRMZM2G142638_T01	3	17.643	1	21	38	58	UUCCACAGCUUUCUUGAACUU	GAGUUUGUGAGGGCUGUGGAA	Cleavage	seq=cds; coord=1:187403377..187407974:-1; parent_gene=GRMZM2G142638	1
zma-miR396e-5p	gnl|ZmGDB|GRMZM2G008607_T02	3	11.557	1	21	712	732	UUCCACAGCUUUCUUGAACUU	AAGUUCAACAAAUUUGUGGAG	Translation	seq=cds; coord=1:234307913..234320895:1; parent_gene=GRMZM2G008607	1
zma-miR396e-5p	gnl|ZmGDB|GRMZM2G095415_T01	3	16.682	1	21	176	196	UUCCACAGCUUUCUUGAACUU	GAGUUUGUGAGGGCUGUGGAA	Cleavage	seq=cds; coord=3:29434621..29439224:-1; parent_gene=GRMZM2G095415	1
zma-miR396e-5p	gnl|ZmGDB|GRMZM2G008607_T01	3	11.557	1	21	772	792	UUCCACAGCUUUCUUGAACUU	AAGUUCAACAAAUUUGUGGAG	Translation	seq=cds; coord=1:234307913..234320907:1; parent_gene=GRMZM2G008607	1
zma-miR396e-5p	gnl|ZmGDB|GRMZM2G018578_T01	3	17.619	1	21	392	412	UUCCACAGCUUUCUUGAACUU	GAGUUUGUGAGGGCUGUGGAA	Cleavage	seq=cds; coord=5:139630848..139638752:-1; parent_gene=GRMZM2G018578	1
zma-miR396e-5p	gnl|ZmGDB|GRMZM2G055701_T01	3	19.91	1	21	308	328	UUCCACAGCUUUCUUGAACUU	GAGUUUGUGAGGGCUGUGGAA	Cleavage	seq=cds; coord=3:222715306..222722462:-1; parent_gene=GRMZM2G055701	1
zma-miR396e-5p	gnl|ZmGDB|GRMZM2G010664_T01	3	19.547	1	21	1324	1344	UUCCACAGCUUUCUUGAACUU	GAGUUCAAGAUAGUUGUUGAA	Translation	seq=cds; coord=3:227359485..227361381:-1; parent_gene=GRMZM2G010664	1
zma-miR396e-5p	gnl|ZmGDB|GRMZM2G478709_T01	3	11.869	1	21	1702	1722	UUCCACAGCUUUCUUGAACUU	AAGGGUAAGAAAGCUGUGGAG	Cleavage	seq=cds; coord=4:179646831..179649237:1; parent_gene=GRMZM2G478709	1
zma-miR396e-3p	gnl|ZmGDB|GRMZM2G150755_T02	2.5	14.695	1	20	392	411	GGUCAAGAAAGCCGUGGGAA	CUCCCUCGGCUUUCUUGAUC	Cleavage	seq=cds; coord=2:176640480..176641635:-1; parent_gene=GRMZM2G150755	1
zma-miR396e-3p	gnl|ZmGDB|GRMZM2G150755_T01	2.5	14.695	1	20	206	225	GGUCAAGAAAGCCGUGGGAA	CUCCCUCGGCUUUCUUGAUC	Cleavage	seq=cds; coord=2:176640344..176641635:-1; parent_gene=GRMZM2G150755	1
zma-miR396e-3p	gnl|ZmGDB|AC214635.3_FGT002	3	24.182	1	21	823	843	GGUCAAGAAAGCCGUGGGAAG	CUCCCCACUGCUUUCUUGGUC	Cleavage	seq=cds; coord=4:124358348..124359718:1; parent_gene=AC214635.3_FG002	1
zma-miR396f-5p	gnl|ZmGDB|GRMZM2G087671_T01	3	21.968	1	21	736	756	UUCCACAGCUUUCUUGAACUU	AAGUUUAAGAAAGCUGUCGAU	Cleavage	seq=cds; coord=6:135779127..135782735:1; parent_gene=GRMZM2G087671	1
zma-miR396f-5p	gnl|ZmGDB|GRMZM2G152526_T01	3	20.585	1	21	370	390	UUCCACAGCUUUCUUGAACUU	AAGUUUGGGAAGGUUGUGGAG	Cleavage	seq=cds; coord=1:143622295..143626633:1; parent_gene=GRMZM2G152526	1
zma-miR396f-5p	gnl|ZmGDB|GRMZM2G178983_T01	3	19.805	1	21	135	155	UUCCACAGCUUUCUUGAACUU	AAGGUCAAGAAAGCCGUGGGA	Cleavage	seq=cds; coord=4:173299838..173300267:-1; parent_gene=GRMZM2G178983	1
zma-miR396f-5p	gnl|ZmGDB|GRMZM2G156656_T01	3	21.789	1	21	805	825	UUCCACAGCUUUCUUGAACUU	GAGUUUAAGAAGGUUGUAGAA	Cleavage	seq=cds; coord=1:295470099..295474847:1; parent_gene=GRMZM2G156656	1
zma-miR396f-5p	gnl|ZmGDB|GRMZM2G517007_T01	3	16.296	1	21	14	34	UUCCACAGCUUUCUUGAACUU	GAGUUUGUGAGGGCUGUGGAA	Cleavage	seq=cds; coord=6:7094066..7095657:-1; parent_gene=GRMZM2G517007	1
zma-miR396f-5p	gnl|ZmGDB|GRMZM2G508397_T01	3	19.615	1	21	56	76	UUCCACAGCUUUCUUGAACUU	GAGUUUGUGAGGGCUGUGGAA	Cleavage	seq=cds; coord=2:196999509..197000799:1; parent_gene=GRMZM2G508397	1
zma-miR396f-5p	gnl|ZmGDB|GRMZM2G478709_T02	3	11.869	1	21	430	450	UUCCACAGCUUUCUUGAACUU	AAGGGUAAGAAAGCUGUGGAG	Cleavage	seq=cds; coord=4:179646912..179649237:1; parent_gene=GRMZM2G478709	1
zma-miR396f-5p	gnl|ZmGDB|GRMZM2G018939_T01	3	19.141	1	21	389	409	UUCCACAGCUUUCUUGAACUU	GAGUUUGUGAGGGCUGUGGAA	Cleavage	seq=cds; coord=5:29690552..29693564:1; parent_gene=GRMZM2G018939	1
zma-miR396f-5p	gnl|ZmGDB|GRMZM2G142638_T01	3	17.643	1	21	38	58	UUCCACAGCUUUCUUGAACUU	GAGUUUGUGAGGGCUGUGGAA	Cleavage	seq=cds; coord=1:187403377..187407974:-1; parent_gene=GRMZM2G142638	1
zma-miR396f-5p	gnl|ZmGDB|GRMZM2G008607_T02	3	11.557	1	21	712	732	UUCCACAGCUUUCUUGAACUU	AAGUUCAACAAAUUUGUGGAG	Translation	seq=cds; coord=1:234307913..234320895:1; parent_gene=GRMZM2G008607	1
zma-miR396f-5p	gnl|ZmGDB|GRMZM2G095415_T01	3	16.682	1	21	176	196	UUCCACAGCUUUCUUGAACUU	GAGUUUGUGAGGGCUGUGGAA	Cleavage	seq=cds; coord=3:29434621..29439224:-1; parent_gene=GRMZM2G095415	1
zma-miR396f-5p	gnl|ZmGDB|GRMZM2G008607_T01	3	11.557	1	21	772	792	UUCCACAGCUUUCUUGAACUU	AAGUUCAACAAAUUUGUGGAG	Translation	seq=cds; coord=1:234307913..234320907:1; parent_gene=GRMZM2G008607	1
zma-miR396f-5p	gnl|ZmGDB|GRMZM2G018578_T01	3	17.619	1	21	392	412	UUCCACAGCUUUCUUGAACUU	GAGUUUGUGAGGGCUGUGGAA	Cleavage	seq=cds; coord=5:139630848..139638752:-1; parent_gene=GRMZM2G018578	1
zma-miR396f-5p	gnl|ZmGDB|GRMZM2G055701_T01	3	19.91	1	21	308	328	UUCCACAGCUUUCUUGAACUU	GAGUUUGUGAGGGCUGUGGAA	Cleavage	seq=cds; coord=3:222715306..222722462:-1; parent_gene=GRMZM2G055701	1
zma-miR396f-5p	gnl|ZmGDB|GRMZM2G010664_T01	3	19.547	1	21	1324	1344	UUCCACAGCUUUCUUGAACUU	GAGUUCAAGAUAGUUGUUGAA	Translation	seq=cds; coord=3:227359485..227361381:-1; parent_gene=GRMZM2G010664	1
zma-miR396f-5p	gnl|ZmGDB|GRMZM2G478709_T01	3	11.869	1	21	1702	1722	UUCCACAGCUUUCUUGAACUU	AAGGGUAAGAAAGCUGUGGAG	Cleavage	seq=cds; coord=4:179646831..179649237:1; parent_gene=GRMZM2G478709	1
zma-miR396f-3p	gnl|ZmGDB|GRMZM2G328154_T01	3	16.736	1	20	87	106	GGUCAAGAAAGCUGUGGGAA	CUUCCACAGCUUUCUUGAAC	Cleavage	seq=cds; coord=9:15357333..15361490:-1; parent_gene=GRMZM2G328154	1
zma-miR396f-3p	gnl|ZmGDB|GRMZM2G178990_T01	3	22.654	1	20	177	196	GGUCAAGAAAGCUGUGGGAA	CUUCCACAGCUUUCUUGAAC	Cleavage	seq=cds; coord=4:173294957..173295667:1; parent_gene=GRMZM2G178990	1
zma-miR396f-3p	gnl|ZmGDB|AC214635.3_FGT002	3	24.182	1	21	823	843	GGUCAAGAAAGCUGUGGGAAG	CUCCCCACUGCUUUCUUGGUC	Cleavage	seq=cds; coord=4:124358348..124359718:1; parent_gene=AC214635.3_FG002	1
zma-miR396f-3p	gnl|ZmGDB|GRMZM2G492252_T01	3	24.752	1	21	275	295	GGUCAAGAAAGCUGUGGGAAG	CUGCCAACAGUUUUCUUGGCC	Cleavage	seq=cds; coord=9:139947777..139955628:-1; parent_gene=GRMZM2G492252	1
zma-miR396f-3p	gnl|ZmGDB|GRMZM2G492252_T02	3	24.943	1	21	56	76	GGUCAAGAAAGCUGUGGGAAG	CUGCCAACAGUUUUCUUGGCC	Cleavage	seq=cds; coord=9:139947777..139955628:-1; parent_gene=GRMZM2G492252	1
zma-miR396f-3p	gnl|ZmGDB|GRMZM2G150755_T02	3	14.695	1	20	392	411	GGUCAAGAAAGCUGUGGGAA	CUCCCUCGGCUUUCUUGAUC	Cleavage	seq=cds; coord=2:176640480..176641635:-1; parent_gene=GRMZM2G150755	1
zma-miR396f-3p	gnl|ZmGDB|GRMZM2G150755_T01	3	14.695	1	20	206	225	GGUCAAGAAAGCUGUGGGAA	CUCCCUCGGCUUUCUUGAUC	Cleavage	seq=cds; coord=2:176640344..176641635:-1; parent_gene=GRMZM2G150755	1
zma-miR396f-3p	gnl|ZmGDB|GRMZM5G849698_T01	3	13.182	1	20	211	230	GGUCAAGAAAGCUGUGGGAA	UUCCUGCAGCUCUCUUGGUC	Translation	seq=cds; coord=3:10606755..10607305:-1; parent_gene=GRMZM5G849698	1
zma-miR396f-3p	gnl|ZmGDB|GRMZM2G316553_T01	3	14.919	1	20	890	909	GGUCAAGAAAGCUGUGGGAA	UGCCGACAGCUUUCUUGGCU	Cleavage	seq=cds; coord=4:189233370..189234290:-1; parent_gene=GRMZM2G316553	1
zma-miR396g-5p	gnl|ZmGDB|GRMZM2G313345_T01	3	21.093	1	21	438	458	UCCCACAGCUUUAUUGAACUG	CAAUUCAGUAGCGCUGUGGGA	Translation	seq=cds; coord=5:165151410..165152661:-1; parent_gene=GRMZM2G313345	1
zma-miR396g-5p	gnl|ZmGDB|GRMZM2G092723_T02	3	21.059	1	21	402	422	UCCCACAGCUUUAUUGAACUG	CAAUUCAGUAGCGCUGUGGGA	Translation	seq=cds; coord=9:154427090..154434550:-1; parent_gene=GRMZM2G092723	1
zma-miR396g-5p	gnl|ZmGDB|GRMZM5G829955_T01	3	24.997	1	21	483	503	UCCCACAGCUUUAUUGAACUG	UGGUACAGCAAAGCUGUGGGA	Cleavage	seq=cds; coord=6:95473748..95476703:1; parent_gene=GRMZM5G829955	1
zma-miR396g-3p	gnl|ZmGDB|GRMZM2G328154_T01	0	16.736	1	21	86	106	GUUCAAGAAAGCUGUGGAAGA	UCUUCCACAGCUUUCUUGAAC	Cleavage	seq=cds; coord=9:15357333..15361490:-1; parent_gene=GRMZM2G328154	1
zma-miR396g-3p	gnl|ZmGDB|GRMZM2G178990_T01	0	22.654	1	21	176	196	GUUCAAGAAAGCUGUGGAAGA	UCUUCCACAGCUUUCUUGAAC	Cleavage	seq=cds; coord=4:173294957..173295667:1; parent_gene=GRMZM2G178990	1
zma-miR396g-3p	gnl|ZmGDB|GRMZM2G464000_T03	2.5	15.236	1	20	126	145	GUUCAAGAAAGCUGUGGAAG	UUUCCAUGGUUUUUUUGAAC	Cleavage	seq=cds; coord=2:209823277..209836282:-1; parent_gene=GRMZM2G464000	1
zma-miR396g-3p	gnl|ZmGDB|GRMZM2G464000_T02	2.5	15.236	1	20	126	145	GUUCAAGAAAGCUGUGGAAG	UUUCCAUGGUUUUUUUGAAC	Cleavage	seq=cds; coord=2:209823260..209834279:-1; parent_gene=GRMZM2G464000	1
zma-miR396g-3p	gnl|ZmGDB|GRMZM2G464000_T04	2.5	15.236	1	20	126	145	GUUCAAGAAAGCUGUGGAAG	UUUCCAUGGUUUUUUUGAAC	Cleavage	seq=cds; coord=2:209823277..209836282:-1; parent_gene=GRMZM2G464000	1
zma-miR396g-3p	gnl|ZmGDB|GRMZM2G464000_T05	2.5	15.236	1	20	126	145	GUUCAAGAAAGCUGUGGAAG	UUUCCAUGGUUUUUUUGAAC	Cleavage	seq=cds; coord=2:209823277..209836282:-1; parent_gene=GRMZM2G464000	1
zma-miR396g-3p	gnl|ZmGDB|GRMZM2G464000_T06	2.5	15.236	1	20	126	145	GUUCAAGAAAGCUGUGGAAG	UUUCCAUGGUUUUUUUGAAC	Cleavage	seq=cds; coord=2:209823277..209834279:-1; parent_gene=GRMZM2G464000	1
zma-miR396h	gnl|ZmGDB|GRMZM2G313345_T01	3	21.093	1	21	438	458	UCCCACAGCUUUAUUGAACUG	CAAUUCAGUAGCGCUGUGGGA	Translation	seq=cds; coord=5:165151410..165152661:-1; parent_gene=GRMZM2G313345	1
zma-miR396h	gnl|ZmGDB|GRMZM2G092723_T02	3	21.059	1	21	402	422	UCCCACAGCUUUAUUGAACUG	CAAUUCAGUAGCGCUGUGGGA	Translation	seq=cds; coord=9:154427090..154434550:-1; parent_gene=GRMZM2G092723	1
zma-miR396h	gnl|ZmGDB|GRMZM5G829955_T01	3	24.997	1	21	483	503	UCCCACAGCUUUAUUGAACUG	UGGUACAGCAAAGCUGUGGGA	Cleavage	seq=cds; coord=6:95473748..95476703:1; parent_gene=GRMZM5G829955	1
zma-miR397a-5p	gnl|ZmGDB|GRMZM2G072808_T01	0	15.392	1	21	687	707	UCAUUGAGCGCAGCGUUGAUG	CAUCAACGCUGCGCUCAAUGA	Cleavage	seq=cds; coord=3:180665954..180668800:1; parent_gene=GRMZM2G072808	1
zma-miR397a-5p	gnl|ZmGDB|AC212414.3_FGT005	2	9.955	1	21	36	56	UCAUUGAGCGCAGCGUUGAUG	UGUUAACGCUGCGAUCAAUGA	Cleavage	seq=cds; coord=8:91405076..91406068:-1; parent_gene=AC212414.3_FG005	1
zma-miR397a-5p	gnl|ZmGDB|AC192330.1_FGT004	2	11.202	1	21	885	905	UCAUUGAGCGCAGCGUUGAUG	UGUUAACGCUGCGAUCAAUGA	Cleavage	seq=cds; coord=10:140597198..140599033:1; parent_gene=AC192330.1_FG004	1
zma-miR397a-5p	gnl|ZmGDB|GRMZM2G305526_T01	2.5	14.554	1	21	693	713	UCAUUGAGCGCAGCGUUGAUG	CAUCAACGCCGCGCUCAACGA	Cleavage	seq=cds; coord=1:39928338..39931744:-1; parent_gene=GRMZM2G305526	1
zma-miR397a-5p	gnl|ZmGDB|GRMZM2G447271_T01	2.5	21.58	1	21	693	713	UCAUUGAGCGCAGCGUUGAUG	CAUCAACGCGGCGCUCAACGA	Cleavage	seq=cds; coord=8:168753962..168757679:-1; parent_gene=GRMZM2G447271	1
zma-miR397a-5p	gnl|ZmGDB|GRMZM2G072780_T01	2.5	24.379	1	21	687	707	UCAUUGAGCGCAGCGUUGAUG	CAUCAACGCGGCGCUCAACGA	Cleavage	seq=cds; coord=3:180675973..180679372:1; parent_gene=GRMZM2G072780	1
zma-miR397a-5p	gnl|ZmGDB|GRMZM2G164467_T01	2.5	24.379	1	21	687	707	UCAUUGAGCGCAGCGUUGAUG	CAUCAACGCGGCGCUCAACGA	Cleavage	seq=cds; coord=1:260072697..260076172:-1; parent_gene=GRMZM2G164467	1
zma-miR397a-5p	gnl|ZmGDB|AC209966.4_FGT005	2	15.099	1	21	1161	1181	UCAUUGAGCGCAGCGUUGAUG	UGUUAACGCUGCGAUCAAUGA	Cleavage	seq=cds; coord=2:224660344..224664068:1; parent_gene=AC209966.4_FG005	1
zma-miR397a-5p	gnl|ZmGDB|AC191015.2_FGT004	2	15.099	1	21	1161	1181	UCAUUGAGCGCAGCGUUGAUG	UGUUAACGCUGCGAUCAAUGA	Cleavage	seq=cds; coord=2:224808561..224812287:1; parent_gene=AC191015.2_FG004	1
zma-miR397a-5p	gnl|ZmGDB|AF466202.2_FGT010	2	13.925	1	21	1455	1475	UCAUUGAGCGCAGCGUUGAUG	UGUUAACGCUGCGAUCAAUGA	Cleavage	seq=cds; coord=10:138611451..138624429:1; parent_gene=AF466202.2_FG010	1
zma-miR397a-5p	gnl|ZmGDB|GRMZM2G464246_T01	2	12.083	1	21	1827	1847	UCAUUGAGCGCAGCGUUGAUG	UGUUAACGCUGCGAUCAAUGA	Cleavage	seq=cds; coord=3:33606018..33609010:1; parent_gene=GRMZM2G464246	1
zma-miR397a-5p	gnl|ZmGDB|GRMZM2G156754_T01	3	24.67	1	21	108	128	UCAUUGAGCGCAGCGUUGAUG	CAUCGGCGCUGUCCUCGAUGA	Translation	seq=cds; coord=6:141218399..141219399:-1; parent_gene=GRMZM2G156754	1
zma-miR397a-5p	gnl|ZmGDB|GRMZM5G802725_T01	3	18.748	1	21	723	743	UCAUUGAGCGCAGCGUUGAUG	CAUUGAUGCUGCAUUCAAUGA	Translation	seq=cds; coord=5:72949639..72952452:-1; parent_gene=GRMZM5G802725	1
zma-miR397a-5p	gnl|ZmGDB|GRMZM2G073614_T01	2.5	12.111	1	21	630	650	UCAUUGAGCGCAGCGUUGAUG	CAUCAACCCCGUGCUCAAUGA	Cleavage	seq=cds; coord=5:12970258..12985719:-1; parent_gene=GRMZM2G073614	1
zma-miR397a-5p	gnl|ZmGDB|GRMZM2G051103_T01	3	16.219	1	21	876	896	UCAUUGAGCGCAGCGUUGAUG	CAUUGAUGCUGCAUUCAAUGA	Translation	seq=cds; coord=9:153558257..153563039:1; parent_gene=GRMZM2G051103	1
zma-miR397a-5p	gnl|ZmGDB|GRMZM2G146152_T01	3	23.155	1	21	705	725	UCAUUGAGCGCAGCGUUGAUG	CGUCAACGCGGCGCUCAACGA	Cleavage	seq=cds; coord=6:151543068..151545861:-1; parent_gene=GRMZM2G146152	1
zma-miR397a-5p	gnl|ZmGDB|GRMZM2G112187_T01	3	15.053	1	21	108	128	UCAUUGAGCGCAGCGUUGAUG	CAUCAACCUCGUGCUCAAUGA	Cleavage	seq=cds; coord=3:78542466..78543513:-1; parent_gene=GRMZM2G112187	1
zma-miR397b-5p	gnl|ZmGDB|GRMZM2G072808_T01	0	15.392	1	21	687	707	UCAUUGAGCGCAGCGUUGAUG	CAUCAACGCUGCGCUCAAUGA	Cleavage	seq=cds; coord=3:180665954..180668800:1; parent_gene=GRMZM2G072808	1
zma-miR397b-5p	gnl|ZmGDB|AC212414.3_FGT005	2	9.955	1	21	36	56	UCAUUGAGCGCAGCGUUGAUG	UGUUAACGCUGCGAUCAAUGA	Cleavage	seq=cds; coord=8:91405076..91406068:-1; parent_gene=AC212414.3_FG005	1
zma-miR397b-5p	gnl|ZmGDB|AC192330.1_FGT004	2	11.202	1	21	885	905	UCAUUGAGCGCAGCGUUGAUG	UGUUAACGCUGCGAUCAAUGA	Cleavage	seq=cds; coord=10:140597198..140599033:1; parent_gene=AC192330.1_FG004	1
zma-miR397b-5p	gnl|ZmGDB|GRMZM2G305526_T01	2.5	14.554	1	21	693	713	UCAUUGAGCGCAGCGUUGAUG	CAUCAACGCCGCGCUCAACGA	Cleavage	seq=cds; coord=1:39928338..39931744:-1; parent_gene=GRMZM2G305526	1
zma-miR397b-5p	gnl|ZmGDB|GRMZM2G447271_T01	2.5	21.58	1	21	693	713	UCAUUGAGCGCAGCGUUGAUG	CAUCAACGCGGCGCUCAACGA	Cleavage	seq=cds; coord=8:168753962..168757679:-1; parent_gene=GRMZM2G447271	1
zma-miR397b-5p	gnl|ZmGDB|GRMZM2G072780_T01	2.5	24.379	1	21	687	707	UCAUUGAGCGCAGCGUUGAUG	CAUCAACGCGGCGCUCAACGA	Cleavage	seq=cds; coord=3:180675973..180679372:1; parent_gene=GRMZM2G072780	1
zma-miR397b-5p	gnl|ZmGDB|GRMZM2G164467_T01	2.5	24.379	1	21	687	707	UCAUUGAGCGCAGCGUUGAUG	CAUCAACGCGGCGCUCAACGA	Cleavage	seq=cds; coord=1:260072697..260076172:-1; parent_gene=GRMZM2G164467	1
zma-miR397b-5p	gnl|ZmGDB|AC209966.4_FGT005	2	15.099	1	21	1161	1181	UCAUUGAGCGCAGCGUUGAUG	UGUUAACGCUGCGAUCAAUGA	Cleavage	seq=cds; coord=2:224660344..224664068:1; parent_gene=AC209966.4_FG005	1
zma-miR397b-5p	gnl|ZmGDB|AC191015.2_FGT004	2	15.099	1	21	1161	1181	UCAUUGAGCGCAGCGUUGAUG	UGUUAACGCUGCGAUCAAUGA	Cleavage	seq=cds; coord=2:224808561..224812287:1; parent_gene=AC191015.2_FG004	1
zma-miR397b-5p	gnl|ZmGDB|AF466202.2_FGT010	2	13.925	1	21	1455	1475	UCAUUGAGCGCAGCGUUGAUG	UGUUAACGCUGCGAUCAAUGA	Cleavage	seq=cds; coord=10:138611451..138624429:1; parent_gene=AF466202.2_FG010	1
zma-miR397b-5p	gnl|ZmGDB|GRMZM2G464246_T01	2	12.083	1	21	1827	1847	UCAUUGAGCGCAGCGUUGAUG	UGUUAACGCUGCGAUCAAUGA	Cleavage	seq=cds; coord=3:33606018..33609010:1; parent_gene=GRMZM2G464246	1
zma-miR397b-5p	gnl|ZmGDB|GRMZM2G156754_T01	3	24.67	1	21	108	128	UCAUUGAGCGCAGCGUUGAUG	CAUCGGCGCUGUCCUCGAUGA	Translation	seq=cds; coord=6:141218399..141219399:-1; parent_gene=GRMZM2G156754	1
zma-miR397b-5p	gnl|ZmGDB|GRMZM5G802725_T01	3	18.748	1	21	723	743	UCAUUGAGCGCAGCGUUGAUG	CAUUGAUGCUGCAUUCAAUGA	Translation	seq=cds; coord=5:72949639..72952452:-1; parent_gene=GRMZM5G802725	1
zma-miR397b-5p	gnl|ZmGDB|GRMZM2G073614_T01	2.5	12.111	1	21	630	650	UCAUUGAGCGCAGCGUUGAUG	CAUCAACCCCGUGCUCAAUGA	Cleavage	seq=cds; coord=5:12970258..12985719:-1; parent_gene=GRMZM2G073614	1
zma-miR397b-5p	gnl|ZmGDB|GRMZM2G051103_T01	3	16.219	1	21	876	896	UCAUUGAGCGCAGCGUUGAUG	CAUUGAUGCUGCAUUCAAUGA	Translation	seq=cds; coord=9:153558257..153563039:1; parent_gene=GRMZM2G051103	1
zma-miR397b-5p	gnl|ZmGDB|GRMZM2G146152_T01	3	23.155	1	21	705	725	UCAUUGAGCGCAGCGUUGAUG	CGUCAACGCGGCGCUCAACGA	Cleavage	seq=cds; coord=6:151543068..151545861:-1; parent_gene=GRMZM2G146152	1
zma-miR397b-5p	gnl|ZmGDB|GRMZM2G112187_T01	3	15.053	1	21	108	128	UCAUUGAGCGCAGCGUUGAUG	CAUCAACCUCGUGCUCAAUGA	Cleavage	seq=cds; coord=3:78542466..78543513:-1; parent_gene=GRMZM2G112187	1
[truncated: 170 more rows]

## Sheet: maize_novel
miRNA_Acc.	Target_Acc.	Expectation	UPE	miRNA_start	miRNA_end	Target_start	Target_end	miRNA_aligned_fragment	Target_aligned_fragment	Inhibition	Target_Desc.	multiplicity
zm_01_04	gnl|ZmGDB|GRMZM2G328304_T01	0	19.015	1	24	1096	1119	GAUGCUCUGGAUAGUUUGAUUGCA	UGCAAUCAAACUAUCCAGAGCAUC	Cleavage	seq=cds; coord=3:148214801..148218796:-1; parent_gene=GRMZM2G328304	1
zm_01_04	gnl|ZmGDB|GRMZM2G485571_T01	0	10.687	1	24	91	114	GAUGCUCUGGAUAGUUUGAUUGCA	UGCAAUCAAACUAUCCAGAGCAUC	Cleavage	seq=cds; coord=6:157581919..157582443:1; parent_gene=GRMZM2G485571	1
zm_01_04	gnl|ZmGDB|GRMZM2G068755_T01	2.5	16.641	1	22	5016	5037	GAUGCUCUGGAUAGUUUGAUUG	UGAUCGAAUUCUUCAGAGCAUC	Cleavage	seq=cds; coord=8:170827069..170854528:1; parent_gene=GRMZM2G068755	1
zm_01_04	gnl|ZmGDB|GRMZM2G009849_T01	2.5	16.576	1	22	2904	2925	GAUGCUCUGGAUAGUUUGAUUG	UGAUCGAAUUCUUCAGAGCAUC	Cleavage	seq=cds; coord=3:186172423..186192188:1; parent_gene=GRMZM2G009849	1
zm_01_04	gnl|ZmGDB|GRMZM2G009849_T02	2.5	16.576	1	22	2904	2925	GAUGCUCUGGAUAGUUUGAUUG	UGAUCGAAUUCUUCAGAGCAUC	Cleavage	seq=cds; coord=3:186172423..186192188:1; parent_gene=GRMZM2G009849	1
zm_01_04	gnl|ZmGDB|GRMZM2G068755_T03	2.5	16.641	1	22	2343	2364	GAUGCUCUGGAUAGUUUGAUUG	UGAUCGAAUUCUUCAGAGCAUC	Cleavage	seq=cds; coord=8:170827205..170854528:1; parent_gene=GRMZM2G068755	1
zm_01_04	gnl|ZmGDB|GRMZM2G068277_T02	3	14.805	1	21	374	394	GAUGCUCUGGAUAGUUUGAUU	AACUAAGCUAUCUGGAGCAUC	Cleavage	seq=cds; coord=5:70625389..70628424:-1; parent_gene=GRMZM2G068277	1
zm_01_09	gnl|ZmGDB|AC190841.2_FGT007	1.5	20.371	1	21	269	289	CGGAGGGGAUUAGAGGGGCUA	UAGUCCCUCUAAUCUCCUUCG	Cleavage	seq=cds; coord=2:229413601..229413924:-1; parent_gene=AC190841.2_FG007	1
zm_01_09	gnl|ZmGDB|GRMZM2G002699_T02	2	17.353	1	20	1065	1084	CGGAGGGGAUUAGAGGGGCU	AGCCCCUUUGAUCCCUUCUG	Cleavage	seq=cds; coord=1:264753736..264760016:1; parent_gene=GRMZM2G002699	1
zm_01_09	gnl|ZmGDB|GRMZM2G002699_T01	2	17.353	1	20	726	745	CGGAGGGGAUUAGAGGGGCU	AGCCCCUUUGAUCCCUUCUG	Cleavage	seq=cds; coord=1:264753718..264759570:1; parent_gene=GRMZM2G002699	1
zm_01_09	gnl|ZmGDB|GRMZM2G329901_T01	3	18.776	1	20	680	699	CGGAGGGGAUUAGAGGGGCU	AGCCUCUUGAAUCCCCUCCA	Cleavage	seq=cds; coord=3:92619759..92622461:-1; parent_gene=GRMZM2G329901	1
zm_01_09	gnl|ZmGDB|GRMZM5G843969_T01	3	16.534	1	20	101	120	CGGAGGGGAUUAGAGGGGCU	AGCUCCUCUAUUCUCCUCCC	Translation	seq=cds; coord=9:121796350..121796982:-1; parent_gene=GRMZM5G843969	1
zm_01_09	gnl|ZmGDB|GRMZM2G703561_T01	3	19.914	1	20	19	38	CGGAGGGGAUUAGAGGGGCU	AGCCUCUCUCAUCUCCUCCC	Translation	seq=cds; coord=1:42749647..42750771:1; parent_gene=GRMZM2G703561	1
zm_01_10	gnl|ZmGDB|GRMZM2G395870_T02	0	18.975	1	22	116	137	CCCUUAACAAGCUCGCAGACGU	ACGUCUGCGAGCUUGUUAAGGG	Cleavage	seq=cds; coord=7:17920890..17921282:-1; parent_gene=GRMZM2G395870	1
zm_01_10	gnl|ZmGDB|GRMZM2G468890_T02	0	22.687	1	22	116	137	CCCUUAACAAGCUCGCAGACGU	ACGUCUGCGAGCUUGUUAAGGG	Cleavage	seq=cds; coord=4:231800361..231800789:-1; parent_gene=GRMZM2G468890	1
zm_01_10	gnl|ZmGDB|GRMZM2G382175_T01	0	23.98	1	22	263	284	CCCUUAACAAGCUCGCAGACGU	ACGUCUGCGAGCUUGUUAAGGG	Cleavage	seq=cds; coord=10:34148453..34148791:1; parent_gene=GRMZM2G382175	1
zm_01_10	gnl|ZmGDB|GRMZM2G395870_T01	0	18.975	1	22	638	659	CCCUUAACAAGCUCGCAGACGU	ACGUCUGCGAGCUUGUUAAGGG	Cleavage	seq=cds; coord=7:17920890..17922150:-1; parent_gene=GRMZM2G395870	1
zm_01_10	gnl|ZmGDB|GRMZM2G347911_T01	0	22.687	1	22	638	659	CCCUUAACAAGCUCGCAGACGU	ACGUCUGCGAGCUUGUUAAGGG	Cleavage	seq=cds; coord=3:61199943..61201403:1; parent_gene=GRMZM2G347911	1
zm_01_10	gnl|ZmGDB|GRMZM2G468890_T01	0	22.687	1	22	638	659	CCCUUAACAAGCUCGCAGACGU	ACGUCUGCGAGCUUGUUAAGGG	Cleavage	seq=cds; coord=4:231800361..231801737:-1; parent_gene=GRMZM2G468890	1
zm_01_10	gnl|ZmGDB|AC211490.2_FGT001	0	20.654	1	22	350	371	CCCUUAACAAGCUCGCAGACGU	ACGUCUGCGAGCUUGUUAAGGG	Cleavage	seq=cds; coord=6:127641944..127643693:-1; parent_gene=AC211490.2_FG001	1
zm_01_10	gnl|ZmGDB|GRMZM2G053634_T03	0	20.143	1	22	116	137	CCCUUAACAAGCUCGCAGACGU	ACGUCUGCGAGCUUGUUAAGGG	Cleavage	seq=cds; coord=4:74937713..74940198:-1; parent_gene=GRMZM2G053634	1
zm_01_10	gnl|ZmGDB|GRMZM2G138911_T02	0	22.533	1	22	116	137	CCCUUAACAAGCUCGCAGACGU	ACGUCUGCGAGCUUGUUAAGGG	Cleavage	seq=cds; coord=5:10034061..10035749:1; parent_gene=GRMZM2G138911	1
zm_01_10	gnl|ZmGDB|GRMZM2G449809_T03	0	20.994	1	22	641	662	CCCUUAACAAGCUCGCAGACGU	ACGUCUGCGAGCUUGUUAAGGG	Cleavage	seq=cds; coord=1:137860501..137863767:-1; parent_gene=GRMZM2G449809	1
zm_01_10	gnl|ZmGDB|GRMZM5G809557_T01	0	20.522	1	22	515	536	CCCUUAACAAGCUCGCAGACGU	ACGUCUGCGAGCUUGUUAAGGG	Cleavage	seq=cds; coord=1:157784478..157788488:-1; parent_gene=GRMZM5G809557	1
zm_01_10	gnl|ZmGDB|GRMZM2G036582_T02	0	23.916	1	22	599	620	CCCUUAACAAGCUCGCAGACGU	ACGUCUGCGAGCUUGUUAAGGG	Cleavage	seq=cds; coord=2:107298571..107301736:1; parent_gene=GRMZM2G036582	1
zm_01_10	gnl|ZmGDB|GRMZM2G012424_T01	0	22.24	1	22	596	617	CCCUUAACAAGCUCGCAGACGU	ACGUCUGCGAGCUUGUUAAGGG	Cleavage	seq=cds; coord=7:92361052..92364108:1; parent_gene=GRMZM2G012424	1
zm_01_10	gnl|ZmGDB|GRMZM5G853226_T01	0	21.08	1	22	119	140	CCCUUAACAAGCUCGCAGACGU	ACGUCUGCGAGCUUGUUAAGGG	Cleavage	seq=cds; coord=8:123122885..123125709:-1; parent_gene=GRMZM5G853226	1
zm_01_10	gnl|ZmGDB|GRMZM2G127492_T02	0	23.809	1	22	698	719	CCCUUAACAAGCUCGCAGACGU	ACGUCUGCGAGCUUGUUAAGGG	Cleavage	seq=cds; coord=2:87064672..87067674:1; parent_gene=GRMZM2G127492	1
zm_01_10	gnl|ZmGDB|GRMZM2G138911_T01	0	22.533	1	22	350	371	CCCUUAACAAGCUCGCAGACGU	ACGUCUGCGAGCUUGUUAAGGG	Cleavage	seq=cds; coord=5:10033417..10036053:1; parent_gene=GRMZM2G138911	1
zm_01_13	gnl|ZmGDB|AC188134.2_FGT011	2.5	14.601	1	20	103	122	GUCUGGGUGGUGUAGUUGGU	ACCAACUACACCAUCGAGAU	Cleavage	seq=cds; coord=5:211701636..211703692:1; parent_gene=AC188134.2_FG011	1
zm_01_13	gnl|ZmGDB|GRMZM2G026447_T01	3	13.402	1	20	1468	1487	GUCUGGGUGGUGUAGUUGGU	CCCAACUGCACCAUCCAGAG	Cleavage	seq=cds; coord=4:92618091..92623601:-1; parent_gene=GRMZM2G026447	1
zm_01_13	gnl|ZmGDB|GRMZM2G012046_T01	3	18.2	1	20	1465	1484	GUCUGGGUGGUGUAGUUGGU	CCCAACUGCACCAUCCAGAG	Cleavage	seq=cds; coord=5:160655200..160661550:1; parent_gene=GRMZM2G012046	1
zm_01_13	gnl|ZmGDB|GRMZM2G372952_T01	3	17.041	1	20	868	887	GUCUGGGUGGUGUAGUUGGU	AUCAACUACACCACUCACAU	Cleavage	seq=cds; coord=9:123829616..123830755:1; parent_gene=GRMZM2G372952	1
zm_01_13	gnl|ZmGDB|GRMZM2G092648_T01	2.5	11.939	1	20	1184	1203	GUCUGGGUGGUGUAGUUGGU	GCCAAGUGUACCACCCAGAC	Cleavage	seq=cds; coord=2:170386769..170391769:-1; parent_gene=GRMZM2G092648	1
zm_01_13	gnl|ZmGDB|GRMZM2G092648_T02	2.5	11.939	1	20	1229	1248	GUCUGGGUGGUGUAGUUGGU	GCCAAGUGUACCACCCAGAC	Cleavage	seq=cds; coord=2:170386769..170391702:-1; parent_gene=GRMZM2G092648	1
zm_01_13	gnl|ZmGDB|GRMZM2G481843_T01	3	18.839	1	20	1162	1181	GUCUGGGUGGUGUAGUUGGU	GCCAAUUACACCACCGAGAU	Cleavage	seq=cds; coord=8:14589956..14595565:-1; parent_gene=GRMZM2G481843	1
zm_01_13	gnl|ZmGDB|GRMZM2G099780_T01	2.5	12.202	1	20	1665	1684	GUCUGGGUGGUGUAGUUGGU	ACCAACUCCACCACCUGGAU	Cleavage	seq=cds; coord=2:192598650..192605670:1; parent_gene=GRMZM2G099780	1
zm_01_13	gnl|ZmGDB|GRMZM2G322748_T01	3	21.148	1	21	571	591	GUCUGGGUGGUGUAGUUGGUU	GACCAGCGACACCACCAAGAC	Cleavage	seq=cds; coord=1:196691877..196695603:-1; parent_gene=GRMZM2G322748	1
zm_01_14	gnl|ZmGDB|GRMZM2G507311_T01	3	9.97	1	20	23	42	AAUACGGAGAAUGCUCAUUG	CAGUGAAUAGUCUCCGUAUU	Translation	seq=cds; coord=4:192376391..192376549:1; parent_gene=GRMZM2G507311	1
zm_01_15	gnl|ZmGDB|GRMZM2G328304_T01	2.5	22.151	1	21	1113	1133	UUGGAUUUUGAUUGGAUGCAC	GAGCAUCCAAUCUAGAUCCAA	Translation	seq=cds; coord=3:148214801..148218796:-1; parent_gene=GRMZM2G328304	1
zm_01_15	gnl|ZmGDB|GRMZM5G862565_T01	3	17.374	1	20	792	811	UUGGAUUUUGAUUGGAUGCA	UGCAUCCAGUCGAGAUUUGA	Cleavage	seq=cds; coord=1:100335533..100348389:1; parent_gene=GRMZM5G862565	1
zm_01_15	gnl|ZmGDB|GRMZM2G099337_T01	3	15.468	1	20	609	628	UUGGAUUUUGAUUGGAUGCA	UGCAUCCAGUCGAGAUUUGA	Cleavage	seq=cds; coord=9:113208705..113216726:-1; parent_gene=GRMZM2G099337	1
zm_01_15	gnl|ZmGDB|GRMZM2G588594_T01	2.5	12.203	1	20	32	51	UUGGAUUUUGAUUGGAUGCA	UGCAUCCAAUCAAAGUUUGG	Cleavage	seq=cds; coord=10:128423893..128424012:-1; parent_gene=GRMZM2G588594	1
zm_01_15	gnl|ZmGDB|GRMZM2G104401_T01	3	17.513	1	21	85	105	UUGGAUUUUGAUUGGAUGCAC	GUUCAUUCAGUCAAAGUCCAG	Cleavage	seq=cds; coord=2:113917174..113917689:1; parent_gene=GRMZM2G104401	1
zm_01_15	gnl|ZmGDB|GRMZM2G485571_T01	2.5	10.83	1	21	108	128	UUGGAUUUUGAUUGGAUGCAC	GAGCAUCCAAUCUAGAUCCAA	Translation	seq=cds; coord=6:157581919..157582443:1; parent_gene=GRMZM2G485571	1
zm_01_15	gnl|ZmGDB|GRMZM2G135038_T01	3	18.576	1	20	1043	1062	UUGGAUUUUGAUUGGAUGCA	UGCAUCCAAUAAAAAUUUAU	Translation	seq=cds; coord=7:149900995..149913271:1; parent_gene=GRMZM2G135038	1
zm_01_15	gnl|ZmGDB|GRMZM2G114739_T01	3	22.401	1	20	1142	1161	UUGGAUUUUGAUUGGAUGCA	GGCAUCGGAUCAAAAUCCAG	Cleavage	seq=cds; coord=1:193865451..193869209:1; parent_gene=GRMZM2G114739	1
zm_01_15	gnl|ZmGDB|GRMZM2G302327_T01	2.5	23.002	1	20	2544	2563	UUGGAUUUUGAUUGGAUGCA	UGCAUCCACUGAAGAUCCAA	Translation	seq=cds; coord=6:117252270..117255110:1; parent_gene=GRMZM2G302327	1
zm_01_15	gnl|ZmGDB|AC205471.4_FGT005	2.5	23.002	1	20	2484	2503	UUGGAUUUUGAUUGGAUGCA	UGCAUCCACUGAAGAUCCAA	Translation	seq=cds; coord=8:125140851..125145597:-1; parent_gene=AC205471.4_FG005	1
zm_01_15	gnl|ZmGDB|GRMZM2G139524_T01	2.5	23.002	1	20	2424	2443	UUGGAUUUUGAUUGGAUGCA	UGCAUCCACUGAAGAUCCAA	Translation	seq=cds; coord=4:12811458..12814297:1; parent_gene=GRMZM2G139524	1
zm_01_15	gnl|ZmGDB|GRMZM2G162112_T01	2.5	10.074	1	20	66	85	UUGGAUUUUGAUUGGAUGCA	UGCGUCCCACCAAAAUCCAA	Translation	seq=cds; coord=8:118394306..118400023:1; parent_gene=GRMZM2G162112	1
zm_01_15	gnl|ZmGDB|GRMZM2G474320_T01	2.5	23.002	1	20	1815	1834	UUGGAUUUUGAUUGGAUGCA	UGCAUCCACUGAAGAUCCAA	Translation	seq=cds; coord=1:174011205..174013538:1; parent_gene=GRMZM2G474320	1
zm_01_15	gnl|ZmGDB|GRMZM5G808419_T01	2.5	18.927	1	20	897	916	UUGGAUUUUGAUUGGAUGCA	UGCAUCCACUGAAGAUCCAA	Translation	seq=cds; coord=5:155817758..155818720:-1; parent_gene=GRMZM5G808419	1
zm_01_15	gnl|ZmGDB|GRMZM2G032947_T01	3	23.72	1	20	311	330	UUGGAUUUUGAUUGGAUGCA	GGCAUCGGAUCAAAAUCCAG	Cleavage	seq=cds; coord=3:47033544..47034270:-1; parent_gene=GRMZM2G032947	1
zm_01_19	gnl|ZmGDB|GRMZM2G077202_T01	2.5	17.73	1	22	53	74	CGGAUGGGUGCUGCGCGGUGGU	GCCGCCGCGCGCCACUCAUCCG	Translation	seq=cds; coord=8:29211106..29216116:-1; parent_gene=GRMZM2G077202	1
zm_01_19	gnl|ZmGDB|GRMZM2G132140_T01	3	17.646	1	22	94	115	CGGAUGGGUGCUGCGCGGUGGU	GUCCCCGCGCAGCGUCCAUCCC	Cleavage	seq=cds; coord=10:30139257..30141420:-1; parent_gene=GRMZM2G132140	1
zm_01_20	gnl|ZmGDB|GRMZM2G575389_T01	0	7.425	1	24	78	101	CCAGCGACUAAUAAAAAGAAACGG	CCGUUUCUUUUUAUUAGUCGCUGG	Cleavage	seq=cds; coord=6:11558974..11559238:1; parent_gene=GRMZM2G575389	1
zm_01_20	gnl|ZmGDB|GRMZM2G100253_T01	1	13.65	1	24	119	142	CCAGCGACUAAUAAAAAGAAACGG	CCGUUUCUUUUUAUUUGUCGCUGG	Translation	seq=cds; coord=4:192248132..192248571:1; parent_gene=GRMZM2G100253	1
zm_01_20	gnl|ZmGDB|GRMZM2G578161_T01	2	12.91	1	24	55	78	CCAGCGACUAAUAAAAAGAAACGG	CCGUUUCUUUUUAGUUGUCGCUGG	Translation	seq=cds; coord=6:155212484..155212843:1; parent_gene=GRMZM2G578161	1
zm_01_20	gnl|ZmGDB|GRMZM2G137239_T01	2	12.023	1	24	154	177	CCAGCGACUAAUAAAAAGAAACGG	CUGUUUCUUUUUAGUUGUCGCUGG	Translation	seq=cds; coord=3:127942874..127943478:-1; parent_gene=GRMZM2G137239	1
zm_01_20	gnl|ZmGDB|GRMZM2G412073_T01	3	15.512	1	24	76	99	CCAGCGACUAAUAAAAAGAAACGG	UCUUUUCUUUUGAUUUGUUGUUGG	Translation	seq=cds; coord=3:2801732..2803086:1; parent_gene=GRMZM2G412073	1
zm_01_21	gnl|ZmGDB|GRMZM2G328304_T01	0	19.015	1	24	1096	1119	GAUGCUCUGGAUAGUUUGAUUGCA	UGCAAUCAAACUAUCCAGAGCAUC	Cleavage	seq=cds; coord=3:148214801..148218796:-1; parent_gene=GRMZM2G328304	1
zm_01_21	gnl|ZmGDB|GRMZM2G485571_T01	0	10.687	1	24	91	114	GAUGCUCUGGAUAGUUUGAUUGCA	UGCAAUCAAACUAUCCAGAGCAUC	Cleavage	seq=cds; coord=6:157581919..157582443:1; parent_gene=GRMZM2G485571	1
zm_01_21	gnl|ZmGDB|GRMZM2G068755_T01	2.5	16.641	1	22	5016	5037	GAUGCUCUGGAUAGUUUGAUUG	UGAUCGAAUUCUUCAGAGCAUC	Cleavage	seq=cds; coord=8:170827069..170854528:1; parent_gene=GRMZM2G068755	1
zm_01_21	gnl|ZmGDB|GRMZM2G009849_T01	2.5	16.576	1	22	2904	2925	GAUGCUCUGGAUAGUUUGAUUG	UGAUCGAAUUCUUCAGAGCAUC	Cleavage	seq=cds; coord=3:186172423..186192188:1; parent_gene=GRMZM2G009849	1
zm_01_21	gnl|ZmGDB|GRMZM2G009849_T02	2.5	16.576	1	22	2904	2925	GAUGCUCUGGAUAGUUUGAUUG	UGAUCGAAUUCUUCAGAGCAUC	Cleavage	seq=cds; coord=3:186172423..186192188:1; parent_gene=GRMZM2G009849	1
zm_01_21	gnl|ZmGDB|GRMZM2G068755_T03	2.5	16.641	1	22	2343	2364	GAUGCUCUGGAUAGUUUGAUUG	UGAUCGAAUUCUUCAGAGCAUC	Cleavage	seq=cds; coord=8:170827205..170854528:1; parent_gene=GRMZM2G068755	1
zm_01_21	gnl|ZmGDB|GRMZM2G068277_T02	3	14.805	1	21	374	394	GAUGCUCUGGAUAGUUUGAUU	AACUAAGCUAUCUGGAGCAUC	Cleavage	seq=cds; coord=5:70625389..70628424:-1; parent_gene=GRMZM2G068277	1
zm_02_02	gnl|ZmGDB|GRMZM2G088134_T01	0.5	21.134	1	20	159	178	CUGUUCUAUAGGAUCGUACU	GGUACGAUCCUAUAGAACAG	Cleavage	seq=cds; coord=5:163942964..163943183:1; parent_gene=GRMZM2G088134	1
zm_02_02	gnl|ZmGDB|GRMZM2G170632_T02	2.5	21.825	1	20	167	186	CUGUUCUAUAGGAUCGUACU	AGUACGGUCCUAAGGGACAG	Cleavage	seq=cds; coord=8:138667705..138671356:-1; parent_gene=GRMZM2G170632	1
zm_02_02	gnl|ZmGDB|GRMZM2G170632_T04	2.5	21.825	1	20	167	186	CUGUUCUAUAGGAUCGUACU	AGUACGGUCCUAAGGGACAG	Cleavage	seq=cds; coord=8:138668300..138671356:-1; parent_gene=GRMZM2G170632	1
zm_02_02	gnl|ZmGDB|GRMZM2G170632_T01	2.5	21.825	1	20	167	186	CUGUUCUAUAGGAUCGUACU	AGUACGGUCCUAAGGGACAG	Cleavage	seq=cds; coord=8:138667667..138671356:-1; parent_gene=GRMZM2G170632	1
zm_02_02	gnl|ZmGDB|GRMZM2G170632_T05	2.5	21.825	1	20	167	186	CUGUUCUAUAGGAUCGUACU	AGUACGGUCCUAAGGGACAG	Cleavage	seq=cds; coord=8:138669608..138671339:-1; parent_gene=GRMZM2G170632	1
zm_02_07	gnl|ZmGDB|GRMZM2G108484_T01	0	23.536	1	21	327	347	CAGACGAUGGUGAGCCGGUGU	ACACCGGCUCACCAUCGUCUG	Cleavage	seq=cds; coord=7:109389896..109392272:-1; parent_gene=GRMZM2G108484	1
zm_02_07	gnl|ZmGDB|AC233935.1_FGT004	0	19.565	1	21	468	488	CAGACGAUGGUGAGCCGGUGU	ACACCGGCUCACCAUCGUCUG	Cleavage	seq=cds; coord=1:40901917..40906800:-1; parent_gene=AC233935.1_FG004	1
zm_02_07	gnl|ZmGDB|GRMZM5G824676_T02	3	21.797	1	21	158	178	CAGACGAUGGUGAGCCGGUGU	ACGCCGGCUCGCCGUCGUCGG	Cleavage	seq=cds; coord=5:214959380..214964247:1; parent_gene=GRMZM5G824676	1
zm_02_07	gnl|ZmGDB|GRMZM2G039520_T01	3	16.965	1	20	361	380	CAGACGAUGGUGAGCCGGUG	GACCGGUUCACCACCGUCUG	Cleavage	seq=cds; coord=4:4487207..4491657:1; parent_gene=GRMZM2G039520	1
zm_02_07	gnl|ZmGDB|GRMZM2G039870_T01	3	23.454	1	20	681	700	CAGACGAUGGUGAGCCGGUG	CACCGGCUCAUCGUCGUUGG	Cleavage	seq=cds; coord=1:138451535..138452383:1; parent_gene=GRMZM2G039870	1
zm_02_07	gnl|ZmGDB|GRMZM2G419542_T01	3	24.668	1	21	309	329	CAGACGAUGGUGAGCCGGUGU	GCGCCGCCUCGCCAUCGUCUU	Cleavage	seq=cds; coord=6:76682858..76684359:1; parent_gene=GRMZM2G419542	1
zm_02_07	gnl|ZmGDB|GRMZM2G111962_T01	3	21.753	1	21	327	347	CAGACGAUGGUGAGCCGGUGU	GCGCUGCCUCACCAUCGUCUU	Cleavage	seq=cds; coord=9:17752112..17753418:-1; parent_gene=GRMZM2G111962	1
zm_02_09	gnl|ZmGDB|GRMZM2G438840_T01	3	23.998	1	20	685	704	UAGCCAAGGAUGAGCUGCCU	GAGCAGCUCAUCAUUGGCUA	Cleavage	seq=cds; coord=9:152256777..152260287:-1; parent_gene=GRMZM2G438840	1
zm_02_09	gnl|ZmGDB|AC214484.3_FGT003	3	23.659	1	20	405	424	UAGCCAAGGAUGAGCUGCCU	GGCCGGCUCAUCGUUGGCUA	Cleavage	seq=cds; coord=5:29969451..29969915:-1; parent_gene=AC214484.3_FG003	1
zm_02_09	gnl|ZmGDB|GRMZM2G039982_T01	3	24.408	1	20	624	643	UAGCCAAGGAUGAGCUGCCU	GGCCAUCUCAUCUUUGGCUA	Cleavage	seq=cds; coord=8:172756064..172760063:-1; parent_gene=GRMZM2G039982	1
zm_02_09	gnl|ZmGDB|GRMZM2G418749_T01	3	21.924	1	20	1789	1808	UAGCCAAGGAUGAGCUGCCU	GGGCAGUGCAUGCUUGGCUA	Translation	seq=cds; coord=7:110914449..110916386:1; parent_gene=GRMZM2G418749	1
zm_02_10	gnl|ZmGDB|GRMZM2G108484_T01	0	20.347	1	22	327	348	CCAGACGAUGGUGAGCCGGUGU	ACACCGGCUCACCAUCGUCUGG	Cleavage	seq=cds; coord=7:109389896..109392272:-1; parent_gene=GRMZM2G108484	1
zm_02_10	gnl|ZmGDB|AC233935.1_FGT004	0	19.8	1	22	468	489	CCAGACGAUGGUGAGCCGGUGU	ACACCGGCUCACCAUCGUCUGG	Cleavage	seq=cds; coord=1:40901917..40906800:-1; parent_gene=AC233935.1_FG004	1
zm_02_10	gnl|ZmGDB|GRMZM2G039520_T01	2.5	17.034	1	20	362	381	CCAGACGAUGGUGAGCCGGU	ACCGGUUCACCACCGUCUGC	Cleavage	seq=cds; coord=4:4487207..4491657:1; parent_gene=GRMZM2G039520	1
zm_02_11	gnl|ZmGDB|GRMZM2G083374_T01	2.5	22.621	1	21	3089	3109	CGGAGGGAAUUGGAGGGGCUA	UAGCCUCUUCAAUUCCUUUUG	Cleavage	seq=cds; coord=3:9768559..9803388:-1; parent_gene=GRMZM2G083374	1
zm_02_11	gnl|ZmGDB|GRMZM2G083374_T02	2.5	22.621	1	21	3089	3109	CGGAGGGAAUUGGAGGGGCUA	UAGCCUCUUCAAUUCCUUUUG	Cleavage	seq=cds; coord=3:9772581..9803414:-1; parent_gene=GRMZM2G083374	1
zm_02_11	gnl|ZmGDB|AC213378.3_FGT003	2.5	16.15	1	21	620	640	CGGAGGGAAUUGGAGGGGCUA	UAGCCCCUCCAAUUCCAUCCC	Cleavage	seq=cds; coord=10:78371593..78372845:1; parent_gene=AC213378.3_FG003	1
zm_02_11	gnl|ZmGDB|GRMZM2G526109_T01	2.5	8.28	1	21	50	70	CGGAGGGAAUUGGAGGGGCUA	UAGCUCCUUCAAUUUCCUCCA	Cleavage	seq=cds; coord=3:26772200..26772312:-1; parent_gene=GRMZM2G526109	1
zm_02_11	gnl|ZmGDB|GRMZM2G405439_T01	2.5	21.851	1	20	82	101	CGGAGGGAAUUGGAGGGGCU	CGCCCUUCCAGUUCCCUCUG	Cleavage	seq=cds; coord=9:54429087..54430976:1; parent_gene=GRMZM2G405439	1
zm_02_11	gnl|ZmGDB|AC190841.2_FGT007	3	20.371	1	21	269	289	CGGAGGGAAUUGGAGGGGCUA	UAGUCCCUCUAAUCUCCUUCG	Cleavage	seq=cds; coord=2:229413601..229413924:-1; parent_gene=AC190841.2_FG007	1
zm_02_11	gnl|ZmGDB|GRMZM2G546024_T01	3	6.758	1	20	3	22	CGGAGGGAAUUGGAGGGGCU	UGCCUUUCCAAUUCCCUCCU	Cleavage	seq=cds; coord=7:139705879..139706015:-1; parent_gene=GRMZM2G546024	1
zm_02_11	gnl|ZmGDB|GRMZM2G351145_T01	2.5	23.288	1	20	362	381	CGGAGGGAAUUGGAGGGGCU	AGUCCUUCCACUUCUCUCCG	Translation	seq=cds; coord=7:130776178..130776935:-1; parent_gene=GRMZM2G351145	1
zm_02_11	gnl|ZmGDB|GRMZM2G159290_T02	3	18.62	1	21	1251	1271	CGGAGGGAAUUGGAGGGGCUA	UGGUCCCUGCAUUUCCCUCCG	Translation	seq=cds; coord=1:275027144..275030706:1; parent_gene=GRMZM2G159290	1
zm_02_11	gnl|ZmGDB|GRMZM2G159290_T01	3	18.62	1	21	798	818	CGGAGGGAAUUGGAGGGGCUA	UGGUCCCUGCAUUUCCCUCCG	Translation	seq=cds; coord=1:275027144..275030728:1; parent_gene=GRMZM2G159290	1
zm_03_01	gnl|ZmGDB|GRMZM2G061702_T03	0.5	13.805	1	24	566	589	AAUUUAGGGGACGUUGCUGGAGAC	GUCUCCAGCAGCGUCCCCUAAAUU	Cleavage	seq=cds; coord=7:50111186..50118412:1; parent_gene=GRMZM2G061702	1
zm_03_01	gnl|ZmGDB|GRMZM2G578355_T01	0.5	8.29	1	23	78	100	AAUUUAGGGGACGUUGCUGGAGA	UCUCCAGCAACGUCUCCUAAAUU	Cleavage	seq=cds; coord=3:180756696..180756806:-1; parent_gene=GRMZM2G578355	1
zm_03_01	gnl|ZmGDB|GRMZM2G483578_T01	0.5	7.375	1	23	1	23	AAUUUAGGGGACGUUGCUGGAGA	UUUCCAGCAACGUUCCCUAAAUU	Cleavage	seq=cds; coord=9:4776693..4776804:-1; parent_gene=GRMZM2G483578	1
zm_03_01	gnl|ZmGDB|GRMZM2G539278_T01	1.5	7.095	1	24	38	61	AAUUUAGGGGACGUUGCUGGAGAC	GUCUCCAGCAACGUACUCUAAAUU	Translation	seq=cds; coord=4:130712141..130712249:1; parent_gene=GRMZM2G539278	1
zm_03_01	gnl|ZmGDB|GRMZM2G502286_T01	3	0.705	1	24	6	29	AAUUUAGGGGACGUUGCUGGAGAC	GUCUCCAGCAACGUCUCCUAAAAA	Cleavage	seq=cds; coord=5:3140616..3140698:-1; parent_gene=GRMZM2G502286	1
zm_03_01	gnl|ZmGDB|GRMZM2G528959_T01	1	9.142	1	23	18	40	AAUUUAGGGGACGUUGCUGGAGA	UCUCCAACAACGUCCCCUAAAUU	Cleavage	seq=cds; coord=9:30593152..30593271:1; parent_gene=GRMZM2G528959	1
zm_03_01	gnl|ZmGDB|GRMZM2G551737_T01	1.5	11.323	1	23	54	76	AAUUUAGGGGACGUUGCUGGAGA	UCUCCAGCAACGUACUCUAAAUU	Translation	seq=cds; coord=1:235718036..235718135:-1; parent_gene=GRMZM2G551737	1
zm_03_01	gnl|ZmGDB|GRMZM2G575130_T01	2	4.245	1	23	25	47	AAUUUAGGGGACGUUGCUGGAGA	UCUCCAGCAACGUCCUCUAUAUU	Cleavage	seq=cds; coord=3:125932351..125932463:1; parent_gene=GRMZM2G575130	1
zm_03_01	gnl|ZmGDB|GRMZM2G589781_T01	2.5	6.482	1	23	25	47	AAUUUAGGGGACGUUGCUGGAGA	UCUCCAGCAACGUUCUCUAUAUU	Cleavage	seq=cds; coord=9:144608974..144609077:-1; parent_gene=GRMZM2G589781	1
zm_03_01	gnl|ZmGDB|GRMZM2G539210_T01	2.5	3.673	1	24	9	32	AAUUUAGGGGACGUUGCUGGAGAC	GUCUCCAACAAAGUCCUCUAAAUU	Cleavage	seq=cds; coord=3:140721241..140721345:-1; parent_gene=GRMZM2G539210	1
zm_03_01	gnl|ZmGDB|GRMZM2G560956_T01	3	14.441	1	24	54	77	AAUUUAGGGGACGUUGCUGGAGAC	GUCUCCAGUAAUAUUCUCUAAAUU	Cleavage	seq=cds; coord=10:74452165..74452263:-1; parent_gene=GRMZM2G560956	1
zm_03_01	gnl|ZmGDB|GRMZM2G040600_T01	3	15.566	1	24	168	191	AAUUUAGGGGACGUUGCUGGAGAC	GUCCCCAGCGAAGUCCCCCAAAUU	Cleavage	seq=cds; coord=7:169339817..169345437:-1; parent_gene=GRMZM2G040600	1
zm_03_01	gnl|ZmGDB|GRMZM2G071304_T01	3	19.643	1	24	492	515	AAUUUAGGGGACGUUGCUGGAGAC	GUCCCCAGCGAAGUCCCCCAAAUU	Cleavage	seq=cds; coord=1:229066317..229073217:1; parent_gene=GRMZM2G071304	1
zm_03_04	gnl|ZmGDB|AC190841.2_FGT007	1.5	20.371	1	21	269	289	CGGAGGAGAUUGGAGGGGCUA	UAGUCCCUCUAAUCUCCUUCG	Cleavage	seq=cds; coord=2:229413601..229413924:-1; parent_gene=AC190841.2_FG007	1
zm_03_04	gnl|ZmGDB|GRMZM2G526109_T01	2.5	8.28	1	21	50	70	CGGAGGAGAUUGGAGGGGCUA	UAGCUCCUUCAAUUUCCUCCA	Cleavage	seq=cds; coord=3:26772200..26772312:-1; parent_gene=GRMZM2G526109	1
zm_03_04	gnl|ZmGDB|GRMZM2G179217_T01	2.5	14.264	1	20	1925	1944	CGGAGGAGAUUGGAGGGGCU	AGUCCUUCCAAUCUUCUCCA	Cleavage	seq=cds; coord=8:154992826..154996721:-1; parent_gene=GRMZM2G179217	1
zm_03_04	gnl|ZmGDB|GRMZM2G474537_T01	2.5	17.097	1	20	1904	1923	CGGAGGAGAUUGGAGGGGCU	AGUCCUUCCAAUCUUCUCCU	Cleavage	seq=cds; coord=3:203284732..203289604:1; parent_gene=GRMZM2G474537	1
zm_03_04	gnl|ZmGDB|GRMZM2G346478_T01	2.5	14.282	1	20	1493	1512	CGGAGGAGAUUGGAGGGGCU	AGUCCUUCCAAUCUUCUCCA	Cleavage	seq=cds; coord=3:230530064..230534420:1; parent_gene=GRMZM2G346478	1
zm_03_04	gnl|ZmGDB|GRMZM2G163877_T02	3	18.331	1	21	468	488	CGGAGGAGAUUGGAGGGGCUA	UGGCCUCUCCAUUCUUCUCUG	Translation	seq=cds; coord=9:28847072..28848392:-1; parent_gene=GRMZM2G163877	1
zm_03_04	gnl|ZmGDB|GRMZM2G163877_T03	3	18.881	1	21	447	467	CGGAGGAGAUUGGAGGGGCUA	UGGCCUCUCCAUUCUUCUCUG	Translation	seq=cds; coord=9:28847072..28848389:-1; parent_gene=GRMZM2G163877	1
zm_03_04	gnl|ZmGDB|GRMZM2G163877_T01	3	18.331	1	21	183	203	CGGAGGAGAUUGGAGGGGCUA	UGGCCUCUCCAUUCUUCUCUG	Translation	seq=cds; coord=9:28847046..28848583:-1; parent_gene=GRMZM2G163877	1
zm_03_04	gnl|ZmGDB|GRMZM2G523815_T01	2.5	17.124	1	21	11	31	CGGAGGAGAUUGGAGGGGCUA	UAGCACAUCCAAUCUCCUCUG	Cleavage	seq=cds; coord=7:2877784..2888552:1; parent_gene=GRMZM2G523815	1
zm_03_04	gnl|ZmGDB|GRMZM2G350841_T01	3	20.177	1	20	3053	3072	CGGAGGAGAUUGGAGGGGCU	AGUCCCUCCAAUCUCUAUCG	Cleavage	seq=cds; coord=10:5003131..5007545:-1; parent_gene=GRMZM2G350841	1
zm_03_04	gnl|ZmGDB|GRMZM2G350795_T01	2.5	23.129	1	20	40	59	CGGAGGAGAUUGGAGGGGCU	AGUUCCUCCGCUCUCCUCCG	Translation	seq=cds; coord=2:150384970..150386277:-1; parent_gene=GRMZM2G350795	1
zm_03_04	gnl|ZmGDB|GRMZM2G446052_T01	2.5	23.9	1	20	40	59	CGGAGGAGAUUGGAGGGGCU	AGUUCCUCCGCUCUCCUCCG	Translation	seq=cds; coord=1:118303571..118304879:-1; parent_gene=GRMZM2G446052	1
zm_03_04	gnl|ZmGDB|GRMZM2G381370_T01	2.5	23.129	1	20	40	59	CGGAGGAGAUUGGAGGGGCU	AGUUCCUCCGCUCUCCUCCG	Translation	seq=cds; coord=7:130492170..130493074:1; parent_gene=GRMZM2G381370	1
zm_03_04	gnl|ZmGDB|GRMZM2G170191_T01	2.5	23.548	1	20	40	59	CGGAGGAGAUUGGAGGGGCU	AGUUCCUCCGCUCUCCUCCG	Translation	seq=cds; coord=8:165072948..165074468:1; parent_gene=GRMZM2G170191	1
zm_03_04	gnl|ZmGDB|GRMZM2G020035_T01	2.5	23.28	1	20	120	139	CGGAGGAGAUUGGAGGGGCU	AGUUCCUCCGCUCUCCUCCG	Translation	seq=cds; coord=8:165137051..165137270:1; parent_gene=GRMZM2G020035	1
zm_03_04	gnl|ZmGDB|GRMZM2G104921_T01	2.5	22.646	1	20	40	59	CGGAGGAGAUUGGAGGGGCU	AGUUCCUCCGCUCUCCUCCG	Translation	seq=cds; coord=6:55812558..55813246:1; parent_gene=GRMZM2G104921	1
[truncated: 136 more rows]

## Sheet: rice_known
miRNA_Acc.	Target_Acc.	Expectation	UPE	miRNA_start	miRNA_end	Target_start	Target_end	miRNA_aligned_fragment	Target_aligned_fragment	Inhibition	Target_Desc.	multiplicity
[truncated: 5,014 more rows]

[truncated: 1 more sheets: rice_novel]
